# Supplementary material for: Borane promoted aryl transfer reaction for the synthesis of α-aryl functionalised β-hydroxy and β-keto esters
Source: Royal Society of Chemistry journal article supplement (doi:10.1039/d2ob00643j), 2022-01-01
Supplement: d2ob00643j1.pdf [file d2ob00643j1.pdf]

Supporting Information

## **Borane promoted aryl transfer reaction for the synthesis of $\alpha$ -aryl functionalised $\beta$ -hydroxy and $\beta$ -keto esters**

Tanja Kaehler,<sup>‡a</sup> Jonas Lorenz,<sup>‡a</sup> Darren M. C. Ould,<sup>a,b</sup> Dorothea Engl,<sup>a</sup> Micol Santi,<sup>a,c</sup> Lukas Gierlich,<sup>a</sup>  
Thomas Wirth<sup>a</sup> and Rebecca L. Melen<sup>\*a</sup>

---

<sup>a</sup> Cardiff Catalysis Institute, School of Chemistry, Cardiff University, Main Building, Park Place, Cardiff, CF10 3AT, Cymru/Wales, United Kingdom  
E-mail: [MelenR@cardiff.ac.uk](mailto:MelenR@cardiff.ac.uk)

<sup>b</sup> Current Address: Department of Chemistry, University of Cambridge, Lensfield Road, Cambridge, CB2 1EW, United Kingdom

<sup>c</sup> Current Address: Faculty of Chemistry/Industrial Organic Chemistry and Biotechnology, Universität Bielefeld, Postfach 100131, D-33501 Bielefeld, Germany.

## Table of Content

|                                                                                                                        |             |
|------------------------------------------------------------------------------------------------------------------------|-------------|
| <b>1. Experimental</b> .....                                                                                           | <b>S3</b>   |
| <b>1.1 General experimental</b> .....                                                                                  | <b>S3</b>   |
| <b>2. Product Characterisation</b> .....                                                                               | <b>S4</b>   |
| <b>2.1 General Procedure</b> .....                                                                                     | <b>S4</b>   |
| <b>2.2 Synthesis and spectral characterisation of <math>\alpha</math>-aryl-<math>\beta</math>-hydroxy esters</b> ..... | <b>S4</b>   |
| <b>2.3 Synthesis and spectral characterisation of <math>\alpha</math>-aryl <math>\beta</math>-keto esters</b> .....    | <b>S17</b>  |
| <b>2.4 Synthesis and spectral characterisation of <math>\alpha</math>-aryl ketones</b> .....                           | <b>S21</b>  |
| <b>3. Optimisation of reaction conditions and determination of diastereomeric ratio</b> .....                          | <b>S24</b>  |
| <b>3.1 Variation of solvent, temperature, and time</b> .....                                                           | <b>S24</b>  |
| <b>3.2 Variation of amount of <math>B(C_6F_5)_3</math></b> .....                                                       | <b>S26</b>  |
| <b>3.3 Example of determination of the diastereomeric ratio</b> .....                                                  | <b>S27</b>  |
| <b>4. Side products of reaction of <i>1a</i>, <math>B(C_6F_5)_3</math>, and 4-fluorobenzaldehyde</b> .....             | <b>S29</b>  |
| <b>5. NMR Spectra</b> .....                                                                                            | <b>S30</b>  |
| <b>6. Crystallographic Data</b> .....                                                                                  | <b>S125</b> |
| <b>6.1 Single crystal X-ray diffraction experimental</b> .....                                                         | <b>S125</b> |
| <b>6.2 Solid-state structures</b> .....                                                                                | <b>S125</b> |
| <b>6.3 X-ray refinement data</b> .....                                                                                 | <b>S129</b> |
| <b>7. References</b> .....                                                                                             | <b>S135</b> |

## 1. Experimental

### 1.1 General experimental

Except for the starting materials, all reactions and manipulations were carried out under an atmosphere of dry, O<sub>2</sub>-free nitrogen using standard double-manifold techniques with a rotary oil pump. A nitrogen-filled glove box (MBraun) was used to manipulate solids including the storage of starting materials, ambient temperature reactions, product recovery and sample preparation for analysis. All solvents (toluene, dichloromethane, hexane, dichloroethane) were dried by employing a Grubbs-type column system (Innovative Technology) or a solvent purification system MB SPS-800 and stored under a nitrogen atmosphere. Anhydrous (with Sure/Seal) dichloroethane was purchased from Merck and dried over molecular sieves before use. Deuterated solvents were distilled and/or dried over molecular sieves before use. Chemicals were purchased from commercial suppliers and used as received. All the triarylfluoroboranes and ethyl  $\alpha$ -diazomethylacetate **1b** were prepared as per the standard literature report.<sup>1</sup> Thin-layer chromatography (TLC) was performed on pre-coated aluminium sheets of Merck silica gel 60 F254 (0.20 mm). <sup>1</sup>H, <sup>13</sup>C, and <sup>19</sup>F NMR spectra were recorded on a Bruker Avance II 400 or Bruker Avance 500 spectrometers. Chemical shifts are expressed as parts per million (ppm,  $\delta$ ) downfield of tetramethylsilane (TMS) and are referenced to CDCl<sub>3</sub> (7.26/77.16 ppm) as internal standard. NMR spectra were referenced to CFCl<sub>3</sub> (<sup>19</sup>F)<sup>2</sup>. The description of signals includes s = singlet, d = doublet, t = triplet, vt = virtual triplet, q = quartet, and m = multiplet, br. = broad. All coupling constants are absolute values and are expressed in Hertz (Hz). <sup>13</sup>C NMR was measured as <sup>1</sup>H decoupled. Most <sup>13</sup>C signals for the C<sub>6</sub>F<sub>5</sub> moiety are broadened and not resolved in the <sup>13</sup>C NMR spectrum. However, a broad doublet ( $J_{C-F} = \sim 250$  Hz) is always visible. All spectra were analysed assuming a first order approximation. Yields are given as isolated yields. In case of the  $\beta$ -hydroxy esters, yields combined are the yields for the anti- and the syn-alcohol together, even if collected separately. In case of a mixture of isomers, the integration of the <sup>1</sup>H or the <sup>19</sup>F NMR is fitted for the racemic 2*S*\*,3*S*\*-alcohol. Only the analytic data for the racemic 2*S*\*,3*S*\*-alcohol is reported since the racemic 2*S*\*,3*R*\*-alcohol is formed in low quantities. IR-Spectra were measured on a Shimadzu IRAffinity-1 photo-spectrometer. Mass spectra were measured on a Waters LCT Premier/XE or a Waters GCT Premier spectrometer. Ions were generated by the Atmospheric Solids, Analysis Probe (ASAP), Electrospray (ES) or Electron Ionisation (EI). The molecular ion peaks values quoted for either molecular ion (M<sup>+</sup>), molecular ion plus or minus hydrogen (M+H<sup>+</sup>, M-H<sup>-</sup>), molecular ion plus sodium (M+Na<sup>+</sup>), molecular ion minus hydroxy (M-OH<sup>+</sup>), and molecular ion minus hydrofluoro (M-HF<sup>+</sup>).

## 2. Product Characterisation

**2.1 General Procedure:** The triaryl borane (1 equiv.) was dissolved in 0.65 mL dry CH<sub>2</sub>Cl<sub>2</sub> in a reaction tube which was sealed with a microwave cap in a glovebox under a nitrogen atmosphere. The  $\alpha$ -diazo propanoate (1 equiv.), dissolved in 0.65 mL dry CH<sub>2</sub>Cl<sub>2</sub>, was added dropwise at ambient temperature. Gas evolution was noticed immediately. The reaction mixture was stirred for 10 minutes at room temperature before adding the electrophile (1 equiv.), dissolved in 0.65 mL dry CH<sub>2</sub>Cl<sub>2</sub>. The reaction was heated to 45 °C for 24 h and quenched by adding 1 mL of a 1M aq. NaOH solution. The phases were separated and the aqueous layer was extracted with CH<sub>2</sub>Cl<sub>2</sub> (3  $\times$  3 mL). The combined organic layer was dried over MgSO<sub>4</sub>. All volatiles were removed *in vacuo* and a <sup>19</sup>F NMR spectrum was taken to determine the diastereomeric ratio. Afterwards, the crude compound was purified *via* preparative thin layer chromatography using hexane/ethyl acetate as eluent.

### 2.2 Synthesis and spectral characterisation of $\alpha$ -aryl- $\beta$ -hydroxy esters

*Synthesis of ethyl 3-(4-fluorophenyl)-3-hydroxy-2-(pentafluorophenyl)propanoate (2a)*

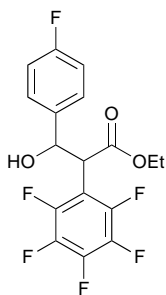

Synthesised in accordance with the *General Procedure* using B(C<sub>6</sub>F<sub>5</sub>)<sub>3</sub> (90 mg, 0.18 mmol), ethyl diazoacetate (**1a**, 20 mg, 0.18 mmol, 15% in toluene), and 4-fluorobenzaldehyde (22 mg, 0.18 mmol) in CH<sub>2</sub>Cl<sub>2</sub> to afford **2a**. The crude reaction mixture was purified *via* preparative thin layer chromatography using hexane/ethyl acetate (95:5 v/v) as eluent. The desired compound **2a** (*dr*: 1:0.07) was obtained as a mixture of diastereomers as a colourless solid. Yield: 49 mg, 0.13 mmol, 74%.

*Note: Some signals of the major ( $\Delta$ ) and the minor ( $*$ ) isomer are overlapping. The carbon signals of the C<sub>6</sub>F<sub>5</sub> substituent of the minor\* compound are too broad to be observed in the <sup>13</sup>C NMR.*

**<sup>1</sup>H NMR** (400.1 MHz, CDCl<sub>3</sub>, 298 K)  $\delta$ : 7.11–7.19 $\Delta*$  (m, 2H, Ar-H), 6.88–6.99 $\Delta*$  (m, 2H, Ar-H), 5.62 $*$  (br. s, 1H, OH), 5.28 $\Delta$  (dd,  $J$  = 9.2, 2.6 Hz, 1H, CH), 4.36 $\Delta$  (d,  $J$  = 2.6 Hz, 1H, CH), 4.17–4.33 $\Delta*$  (m, 3H, OH $\Delta$ , Et-CH<sub>2</sub> $\Delta*$ , CH $*$ ), 3.07 $*$  (d,  $J$  = 2.8 Hz, 1H, CH), 1.20–1.26 $\Delta*$  (m, 3H, CH<sub>3</sub>) ppm. **<sup>13</sup>C NMR** (125.8 MHz, CDCl<sub>3</sub>, 298 K)  $\delta$ : 171.5 $\Delta$ , 170.5 $*$ , 162.7 $\Delta$  (d,  $J_{C-F}$  = 247.5 Hz), 166.3 $*$  (d,  $J_{C-F}$  = 246.9 Hz), 144.7 $\Delta$  (br. d,  $J_{C-F}$  = 247.5 Hz), 140.7 $\Delta$  (br. d,  $J_{C-F}$  = 253.3 Hz), 274.8 $\Delta$  (br. d,  $J_{C-F}$  = 255.5 Hz), 135.6 $*$ , 135.3 $\Delta$  (d,  $J_{C-F}$  = 3.4 Hz), 128.3 $\Delta$  (d,  $J_{C-F}$  = 8.3 Hz), 127.7 $*$  (d,  $J_{C-F}$  = 8.3 Hz), 115.5 $\Delta$  (d,  $J_{C-F}$  = 21.9 Hz), 115.4 $*$  (d,  $J_{C-F}$  = 21.7 Hz), 110.6 $\Delta$  (t,  $J_{C-F}$  = 18.5 Hz), 73.0 $\Delta$ , 71.9 $*$ , 62.6 $\Delta$ , 62.3 $*$ , 48.8 $*$ , 48.3 $\Delta$ , 15.4 $*$ , 14.1 $\Delta$  ppm. **<sup>19</sup>F NMR** (376.5

MHz, CDCl<sub>3</sub>, 298 K)  $\delta$ : -113.04<sup>Δ</sup> (s, 1F, Ar-F), -113.86<sup>\*</sup> (s, 1F, Ar-F), -139.61<sup>\*</sup> (br. s, 2F, Ar-F), -140.98<sup>Δ</sup> (ddd,  $J$  = 20.8, 6.2, 4.0 Hz, 2F, Ar-F), -153.63<sup>Δ</sup> (vt,  $J$  = 20.8 Hz, 1F, Ar-F), -154.17<sup>\*</sup> (vt,  $J$  = 20.8 Hz, 1F, Ar-F), -161.38<sup>Δ</sup> (ddd,  $J$  = 20.8, 6.2, 4.0 Hz, 2F, Ar-F), -162.18<sup>\*</sup> (dt,  $J$  = 20.8, 6.2 Hz, 1F, Ar-F) ppm. **IR**  $\nu_{\max}$  (cm<sup>-1</sup>): 3505 (OH), 3046, 2986, 2932, 2855, 1726 (C=O), 1655, 1605, 1522, 1503, 1369, 1300, 1225, 1184, 1157, 1125, 1043, 1015. **HRMS** (ASAP) [M-H]<sup>+</sup> [C<sub>17</sub>H<sub>11</sub>O<sub>3</sub>F<sub>6</sub>]<sup>+</sup>: calculated 377.0612, found 377.0622.

*Synthesis of ethyl 3-(4-fluorophenyl)-3-hydroxy-2-methyl-2-(pentafluorophenyl)propanoate (2b)*

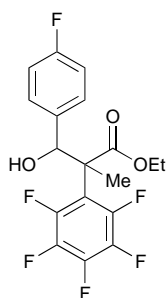

Synthesised in accordance with the *General Procedure* using B(C<sub>6</sub>F<sub>5</sub>)<sub>3</sub> (80 mg, 0.16 mmol), ethyl  $\alpha$ -diazomethylacetate (**1b**, 20 mg, 0.16 mmol), and 4-fluorobenzaldehyde (19 mg, 0.16 mmol) in CH<sub>2</sub>Cl<sub>2</sub> to afford **2b**. The crude reaction mixture was purified *via* preparative thin layer chromatography using hexane/ethyl acetate (95:5 v/v) as eluent. The desired compound **2b** (*dr*: 1:0.1) was obtained as a colourless oil. Yield combined: 44 mg, 0.11 mmol, 72%.

**<sup>1</sup>H NMR** (500.2 MHz, CDCl<sub>3</sub>, 298 K)  $\delta$ : 6.87–6.95 (m, 4H, Ar-H), 5.28 (d,  $J$  = 2.7 Hz, 1H), 4.62 (d,  $J$  = 2.7 Hz, 1H), 4.22–4.28 (m, 2H, CH<sub>2</sub>), 1.74 (t,  $J$  = 3.0 Hz, 3H, CH<sub>3</sub>), 1.23 (t,  $J$  = 7.1 Hz, 3H, CH<sub>3</sub>) ppm. **<sup>13</sup>C NMR** (125.8 MHz, CDCl<sub>3</sub>, 298 K)  $\delta$ : 176.5, 162.7 (d,  $J_{C-F}$  = 247.4 Hz), 146.0 (br. d,  $J_{C-F}$  = 247.7 Hz), 140.4 (br. d,  $J_{C-F}$  = 252.8 Hz), 137.7 (br. d,  $J_{C-F}$  = 251.8 Hz), 133.7 (d,  $J_{C-F}$  = 3.3 Hz), 129.1 (d,  $J_{C-F}$  = 8.0 Hz), 114.8 (d,  $J_{C-F}$  = 21.6 Hz), 114.8 (br. s), 75.2, 62.5, 53.8, 16.7 (t,  $J_{C-F}$  = 6.1 Hz), 14.0 ppm. **<sup>19</sup>F NMR** (470.2 MHz, CDCl<sub>3</sub>, 298 K)  $\delta$ : -113.76–-113.70 (m, 1F, Ar-F), -138.41 (d,  $J$  = 18.9 Hz, 2F, Ar-F), -154.27 (t,  $J$  = 20.9 Hz, 1F, Ar-F), -161.88 (ddd,  $J$  = 20.9, 18.9, 6.7 Hz, 2F, Ar-F) ppm. **IR**  $\nu_{\max}$  (cm<sup>-1</sup>): 3514 (OH), 3048, 2986, 2961, 2941, 2907, 1719 (C=O), 1655, 1607, 1524, 1489, 1395, 1306, 1263, 1225, 1194, 1159, 1125, 1099, 1076, 1015. **HRMS** (GC-MS) [M-HF]<sup>+</sup> [C<sub>18</sub>H<sub>13</sub>O<sub>3</sub>F<sub>5</sub>]<sup>+</sup>: calculated 372.0779, found 372.0791.

*Synthesis of ethyl 2-((4-fluorophenyl)(hydroxy)methyl)-2-methylbutanoate (2r)*

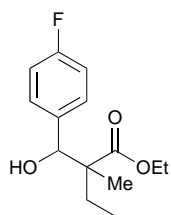

Synthesised in accordance with the *General Procedure* using  $\text{BEt}_3$  (0.16 mL, 0.16 mmol, 1M in hexane), ethyl  $\alpha$ -diazomethylacetate (**1b**, 20 mg, 0.16 mmol), and 4-fluorobenzaldehyde (19 mg, 0.16 mmol) in  $\text{CH}_2\text{Cl}_2$  to afford **2r**. The crude reaction mixture was purified *via* preparative thin layer chromatography using hexane/ethyl acetate (90:10 v/v) as eluent. The desired compound **2r** (*dr*: 1:0.58) was obtained as a colourless oil. Yield combined: 30 mg, 0.12 mmol, 76%.

**$^1\text{H}$  NMR** (500.2 MHz,  $\text{CDCl}_3$ , 298 K)  $\delta$ : 7.25–7.28 (m, 2H, Ar-H), 6.99–7.02 (m, 2H, Ar-H), 4.88 (d,  $J = 4.9$  Hz, 1H), 4.13–5.25 (m, 2H,  $\text{CH}_2$ ), 4.17 (d,  $J = 4.9$  Hz, 1H), 1.72–1.79 (m, 1H), 1.23–1.31 (m, 4H,  $\text{CH}_2$  and  $\text{CH}_3$ ), 1.02 (s, 3H,  $\text{CH}_3$ ), 0.84 ppm (t,  $J = 7.5$  Hz, 3H,  $\text{CH}_3$ ).  **$^{13}\text{C}$  NMR** (125.8 MHz,  $\text{CDCl}_3$ , 298 K)  $\delta$ : 177.1, 162.4 (d,  $J_{\text{C-F}} = 245.8$  Hz), 136.2 (d,  $J_{\text{C-F}} = 3.2$  Hz), 129.3 (d,  $J_{\text{C-F}} = 7.9$  Hz), 114.8 (d,  $J_{\text{C-F}} = 20.8$  Hz), 77.7, 61.0, 52.1, 30.1, 15.7, 14.4, 9.0 ppm.  **$^{19}\text{F}$  NMR** (470.6 MHz,  $\text{CDCl}_3$ , 298 K)  $\delta$ : -114.87–114.81 ppm. **IR**  $\nu_{\text{max}}$  ( $\text{cm}^{-1}$ ): 3390 (OH), 2974, 2929 2881, 1716 (C=O), 1604, 1508, 1460, 1384, 1367, 1222, 1155, 1130, 1099, 1062, 1033, 1014, 1001. **HRMS** (GC-MS)  $[\text{M-OH}]^+$   $[\text{C}_{14}\text{H}_{18}\text{O}_2\text{F}]^+$ : calculated 237.12853, found 237.1285.

*Synthesis of ethyl 3-hydroxy-2-methyl-2-(pentafluorophenyl)-3-(4-(trifluoromethyl)phenyl)propanoate (2c)*

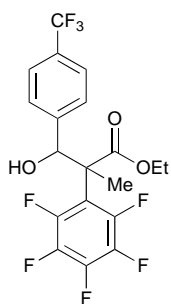

Synthesised in accordance with the *General Procedure* using  $\text{B}(\text{C}_6\text{F}_5)_3$  (80 mg, 0.16 mmol), ethyl  $\alpha$ -diazomethylacetate (**1b**, 20 mg, 0.16 mmol), and 4-trifluoromethylbenzaldehyde (27 mg, 0.16 mmol) in  $\text{CH}_2\text{Cl}_2$  to afford **2c**. The crude reaction mixture was purified *via* preparative thin layer chromatography using hexane/ethyl acetate (95:5 v/v) as eluent. The desired compound **2c** (*dr*: 1:0.28) was obtained as a colourless oil. Yield combined: 35 mg, 0.08 mmol, 51%.

**$^1\text{H}$  NMR** (400.1 MHz,  $\text{CDCl}_3$ , 298 K)  $\delta$ : 7.46–7.48 (m, 2H, Ar-CH), 7.07–7.10 (m, 2H, Ar-CH), 5.35 (d,  $J = 2.8$  Hz, 1H), 4.69 (d,  $J = 2.8$  Hz, 1H), 4.23–4.29 (m, 2H,  $\text{CH}_2$ ), 1.75 (t,  $J = 3.0$  Hz, 3H,  $\text{CH}_3$ ), 1.24 (t,  $J = 7.1$  Hz, 3H,  $\text{CH}_3$ ) ppm.  **$^{13}\text{C}$  NMR** (125.8 MHz,  $\text{CDCl}_3$ , 298 K)  $\delta$ : 176.1, 145.9 (br. d,  $J_{\text{C-F}} = 248.1$  Hz), 141.7, 140.6 (br. d,  $J_{\text{C-F}} = 256.1$  Hz), 137.7 (br. d,  $J_{\text{C-F}} = 253.5$  Hz), 130.5 (q,  $J_{\text{C-F}} = 32.8$  Hz), 127.8, 124.6 (q,  $J_{\text{C-F}} = 3.9$  Hz), 123.9 (q,  $J_{\text{C-F}} = 271.2$  Hz), 114.3 (br. s), 75.3, 62.5, 53.4, 16.6 (t,  $J_{\text{C-F}} = 6.4$  Hz), 13.8 ppm.  **$^{19}\text{F}$  NMR** (376.5 MHz,

CDCl<sub>3</sub>, 298 K)  $\delta$ : -62.66 (s, 3F, CF<sub>3</sub>), -138.34 (dd,  $J$  = 21.4, 7.0 Hz, 2F, Ar-F), -153.60 (vt,  $J$  = 21.4 Hz, 1F, Ar-F), -161.53 (dt,  $J$  = 21.4, 7.0 Hz, 2F, Ar-F) ppm. **IR**  $\nu_{\max}$  (cm<sup>-1</sup>): 3509 (OH), 2988, 2941, 2909, 1719 (C=O), 1653, 1622, 1524, 1489, 1416, 1323, 1252, 1165, 1125, 1078, 1067, 1016. **HRMS** (GC-MS) [M-F]<sup>+</sup> [C<sub>19</sub>H<sub>14</sub>O<sub>3</sub>F<sub>7</sub>]<sup>+</sup>: calculated 423.0826, found 423.0819.

*Synthesis of ethyl 3-hydroxy-3-(4-methoxyphenyl)-2-methyl-2-(pentafluorophenyl)propanoate (2d)*

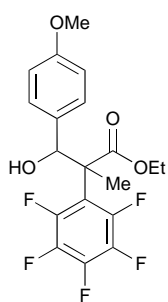

Synthesised in accordance with the *General Procedure* using B(C<sub>6</sub>F<sub>5</sub>)<sub>3</sub> (80 mg, 0.16 mmol), ethyl  $\alpha$ -diazomethylacetate (**1b**, 20 mg, 0.16 mmol), and 4-methoxybenzaldehyde (21 mg, 0.16 mmol) in CH<sub>2</sub>Cl<sub>2</sub> to afford **2d**. The crude reaction mixture was purified *via* preparative thin layer chromatography using hexane/ethyl acetate (90:10 v/v) as eluent. The desired compound **2d** (*one diastereomer*) was obtained as a colourless oil. Yield combined: 23 mg, 0.06

mmol, 36%.

**<sup>1</sup>H NMR** (400.1 MHz, CDCl<sub>3</sub>, 298 K)  $\delta$ : 6.85–6.89 (m, 2H, Ar-H), 6.70–6.74 (m, 2H, Ar-H), 5.25 (d,  $J$  = 2.8 Hz, 1H), 4.57 (d,  $J$  = 2.8 Hz, 1H), 4.21–4.28 (m, 2H, CH<sub>2</sub>), 3.76 (s, 3H, OCH<sub>3</sub>), 1.75 (t,  $J$  = 3.1 Hz, 3H, CH<sub>3</sub>), 1.23 (t,  $J$  = 7.4 Hz, 3H, CH<sub>3</sub>) ppm. **<sup>13</sup>C NMR** (125.8 MHz, CDCl<sub>3</sub>, 298 K)  $\delta$ : 176.6, 159.5, 146.1 (br. d,  $J_{C-F}$  = 255.4 Hz), 140.3 (br. d,  $J_{C-F}$  = 250.3 Hz), 137.3 (br. d,  $J_{C-F}$  = 250.3 Hz), 129.9, 128.5, 115.1 3 (br. t,  $J_{C-F}$  = 13.6 Hz), 113.2, 75.4, 62.3, 55.3, 54.0, 16.8 (t,  $J_{C-F}$  = 6.1 Hz), 14.0 ppm. **<sup>19</sup>F NMR** (376.5 MHz, CDCl<sub>3</sub>, 298 K)  $\delta$ : -138.44 (dd,  $J$  = 22.0, 7.0 Hz, 2F, Ar-F), -154.68 (vt,  $J$  = 22.0 Hz, 1F, Ar-F), -162.20 (dt,  $J$  = 22.0, 7.0 Hz, 2F, Ar-F) ppm. **IR**  $\nu_{\max}$  (cm<sup>-1</sup>): 3520 (OH), 3057, 2986, 2961, 2907, 2809 (OCH<sub>3</sub>), 1719 (C=O), 1655, 1612, 1524, 1489, 1304, 1248, 1175, 1125, 1103, 1076, 1034. **HRMS** (ES<sup>+</sup>) [M-OH]<sup>+</sup> [C<sub>19</sub>H<sub>16</sub>O<sub>3</sub>F<sub>5</sub>]<sup>+</sup>: calculated 387.1020, found 387.1040.

*Synthesis of ethyl 3-(3,5-dimethoxyphenyl)-3-hydroxy-2-methyl-2-(pentafluorophenyl)propanoate (2e)*

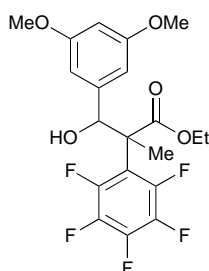

Synthesised in accordance with the *General Procedure* using B(C<sub>6</sub>F<sub>5</sub>)<sub>3</sub> (80 mg, 0.16 mmol), ethyl  $\alpha$ -diazomethylacetate (**1b**, 20 mg, 0.16 mmol), and 3,5-dimethoxybenzaldehyde (26 mg, 0.16 mmol) in CH<sub>2</sub>Cl<sub>2</sub> to afford **2e**. The crude reaction mixture was purified *via* preparative thin layer chromatography using hexane/ethyl acetate (90:10 v/v) as eluent. The

desired compound **2e** (*dr*: 1:0.11) was obtained as a colourless solid. Yield combined: 22 mg, 0.05 mmol, 32%.

**<sup>1</sup>H NMR** (400.1 MHz, CDCl<sub>3</sub>, 298 K)  $\delta$ : 6.34 (vt,  $J$  = 2.3 Hz, 1H, Ar-H), 6.11 (d,  $J$  = 2.3 Hz, 2H, Ar-H), 5.22 (d,  $J$  = 2.9 Hz, 1H), 4.59 (d,  $J$  = 2.9 Hz, 1H), 4.21–4.29 (m, 2H, CH<sub>2</sub>), 3.68 (s, 6H OCH<sub>3</sub>), 1.78 (t,  $J$  = 2.9 Hz, 3H, CH<sub>3</sub>), 1.23 (t,  $J$  = 7.4 Hz, 3H, CH<sub>3</sub>) ppm. **<sup>13</sup>C NMR** (125.8 MHz, CDCl<sub>3</sub>, 298 K)  $\delta$ : 176.5, 160.2, 146.2 (br. d,  $J_{C-F}$  = 248.9 Hz), 140.4 (br. d,  $J_{C-F}$  = 243.1 Hz), 140.1, 137.7 (br. d,  $J_{C-F}$  = 251.8 Hz), 115.2 (br. s), 105.8, 100.2, 75.9, 62.4, 55.4, 53.9, 17.0, (t,  $J_{C-F}$  = 6.0 Hz), 14.0 ppm. **<sup>19</sup>F NMR** (376.5 MHz, CDCl<sub>3</sub>, 298 K)  $\delta$ : -138.28 (dd,  $J$  = 22.0, 7.0 Hz, 2F, Ar-F), -154.73 (vt,  $J$  = 22.0 Hz, 1F, Ar-F), -162.22 (dt,  $J$  = 22.0, 7.0 Hz, 2F, Ar-F) ppm. **IR**  $\nu_{\max}$  (cm<sup>-1</sup>): 3512 (OH), 2997, 2957, 2938, 2839 (OCH<sub>3</sub>), 1719 (C=O), 1653, 1597, 1524, 1489, 1460, 1429, 1246, 1204, 1155, 1123, 1103, 1090, 1065. **HRMS** (ES<sup>+</sup>) [M-OH]<sup>+</sup> [C<sub>20</sub>H<sub>18</sub>O<sub>4</sub>F<sub>5</sub>]<sup>+</sup>: calculated 417.1125, found 417.1124.

#### Synthesis of ethyl -3-hydroxy-2-methyl-2-(pentafluorophenyl)-3-(*o*-tolyl)propanoate (**2f**)

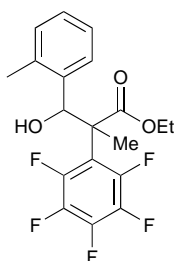

Synthesised in accordance with the *General Procedure* using B(C<sub>6</sub>F<sub>5</sub>)<sub>3</sub> (80 mg, 0.16 mmol), ethyl  $\alpha$ -diazomethylacetate (**1b**, 20 mg, 0.16 mmol), and 2-methylbenzaldehyde (19 mg, 0.16 mmol) in CH<sub>2</sub>Cl<sub>2</sub> to afford **2f**. The crude reaction mixture was purified *via* preparative thin layer chromatography using hexane/ethyl acetate (95:5 v/v) as eluent. The desired compound **2f** (*dr*: 1:0.20)

was obtained as a colourless solid. Yield combined: 44 mg, 0.11 mmol, 73%.

**<sup>1</sup>H NMR** (400.1 MHz, CDCl<sub>3</sub>, 298 K)  $\delta$ : 7.61 (dd,  $J$  = 7.8, 1.5 Hz, 1H, Ar-H), 7.22 (dt,  $J$  = 7.6, 1.5 Hz, 1H, Ar-H), 7.15 (dt,  $J$  = 7.6, 1.5 Hz, 1H, Ar-H), 6.95 (dd,  $J$  = 7.8, 1.5 Hz, 1H, Ar-H), 5.68 (s, 1H), 4.51 (bs, 1H), 4.27 (q,  $J$  = 7.2 Hz, 2H, CH<sub>2</sub>), 1.85 (t,  $J$  = 2.5 Hz, 3H, CH<sub>3</sub>), 1.80 (s, 3H, *o*-CH<sub>3</sub>), 1.25 (t,  $J$  = 7.2 Hz, 3H, CH<sub>3</sub>) ppm. **<sup>13</sup>C NMR** (125.8 MHz, CDCl<sub>3</sub>, 298 K)  $\delta$ : 176.6, 146.3 (br. d,  $J_{C-F}$  = 250.0 Hz), 140.5 (br. d,  $J_{C-F}$  = 254.1 Hz), 137.5 (br. d,  $J_{C-F}$  = 251.2 Hz), 136.1, 135.2, 130.3, 128.5, 128.2, 125.8, 114.9, (br. t,  $J_{C-F}$  = 13.8 Hz), 70.8, 62.4, 53.7, 18.9, 17.3 (t,  $J_{C-F}$  = 5.8 Hz), 13.9 ppm. **<sup>19</sup>F NMR** (376.5 MHz, CDCl<sub>3</sub>, 298 K)  $\delta$ : -137.59 (dd,  $J$  = 21.4, 5.2 Hz, 2F, Ar-F), -154.53 (vt,  $J$  = 21.4 Hz, 1F, Ar-F), -162.15 (dt,  $J$  = 21.4, 5.2 Hz, 2F, Ar-F) ppm. **IR**  $\nu_{\max}$  (cm<sup>-1</sup>): 3520 (OH), 3057, 2983, 2940, 1719 (C=O), 1653, 1524, 1489, 1381, 1304, 1234, 1119, 1099, 1070, 1043. **HRMS** (ES<sup>+</sup>) [M-OH]<sup>+</sup> [C<sub>19</sub>H<sub>16</sub>O<sub>2</sub>F<sub>5</sub>]<sup>+</sup>: calculated 371.1070, found 371.1057.



### Synthesis of ethyl 3-hydroxy-2-methyl-2-(pentafluorophenyl)-3-phenylpropanoate (**2g**)

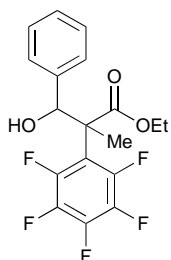

Synthesised in accordance with the *General Procedure* using  $B(C_6F_5)_3$  (80 mg, 0.16 mmol), ethyl  $\alpha$ -diazomethylacetate (**1b**, 20 mg, 0.16 mmol), and benzaldehyde (17 mg, 0.16 mmol) in  $CH_2Cl_2$  to afford **2g**. The crude reaction mixture was purified *via* preparative thin layer chromatography using hexane/ethyl acetate (95:5 v/v) as eluent. The desired compound **2g** (*dr*: 1:0.09)

was obtained as a colourless oil. Yield combined: 24 mg, 0.06 mmol, 41%.

**$^1H$  NMR** (500.2 MHz,  $CDCl_3$ , 298 K)  $\delta$ : 7.17–7.26 (m, 3H, Ar-H), 6.94 (m, 2H, Ar-H), 5.30 (d,  $J = 2.8$  Hz, 1H), 4.58 (d,  $J = 2.8$  Hz, 1H), 4.22–4.29 (m, 2H,  $CH_2$ ), 1.76 (t,  $J = 2.9$  Hz, 3H,  $CH_3$ ), 1.24 (t,  $J = 7.2$  Hz, 3H,  $CH_3$ ) ppm.  **$^{13}C$  NMR** (125.8 MHz,  $CDCl_3$ , 298 K)  $\delta$ : 176.6, 146.1 (br. d,  $J_{C-F} = 247.8$  Hz), 140.4 (br. d,  $J_{C-F} = 256.6$  Hz), 137.6 (br. d,  $J_{C-F} = 252.2$  Hz), 137.7, 128.4, 127.8, 127.4, 115.0 (br. s), 75.8, 62.4, 53.9, 16.8 (t,  $J_{C-F} = 6.1$  Hz), 14.0 ppm.  **$^{19}F$  NMR** (376.5 MHz,  $CDCl_3$ , 298 K)  $\delta$ : -138.48 (dd,  $J = 21.2, 5.7$  Hz, 2F, Ar-F), -154.60 (vt,  $J = 21.2$  Hz, 1F, Ar-F), -162.23 (dt,  $J = 21.2, 5.2$  Hz, 2F, Ar-F) ppm. **IR**  $\nu_{max}$  ( $cm^{-1}$ ): 3522 (OH), 3065, 3032, 2984, 2959, 2907, 1721 (C=O), 1653, 1524, 1489, 1250, 1229, 1125, 1105, 1069. **HRMS** (ASAP+)  $[M-OH]^+$   $[C_{18}H_{14}O_2F_5]^+$ : calculated 357.0914, found 257.0920.

### Synthesis of ethyl (*E*)-3-hydroxy-2-methyl-2-(pentafluorophenyl)hex-4-enoate (**2h**)

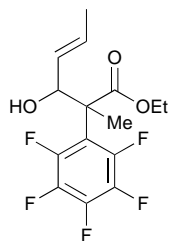

Synthesised in accordance with *General Procedure* using  $B(C_6F_5)_3$  (80 mg, 0.16 mmol), ethyl  $\alpha$ -diazomethylacetate (**1b**, 20 mg, 0.16 mmol), and crotonaldehyde (11 mg, 0.16 mmol) in  $CH_2Cl_2$  to afford **2h**. The crude reaction mixture was purified *via* preparative thin layer chromatography using hexane/ethyl acetate (95:5 v/v) as eluent. The desired compound **2h** (*dr*: 1:0.22)

was obtained as a colourless oil. Yield combined: 30 mg, 0.09 mmol, 57%.

**$^1H$  NMR** (400.1 MHz,  $CDCl_3$ , 298 K)  $\delta$ : 5.54–5.61 (m, 1H, CH), 5.40–5.46 (m, 1H, CH), 4.57 (vt,  $J = 6.2, 5.3$  Hz, 1H), 4.23 (q,  $J = 7.7$  Hz, 2H,  $CH_2$ ), 3.83 (d,  $J = 5.3$  Hz, 1H), 1.69 (t,  $J = 3.0, 3H, CH_3$ ), 1.63 (dd,  $J = 6.4, 1.3, 3H, CH_3$ ), 1.24 (t,  $J = 7.7, 3H, CH_3$ ) ppm.  **$^{13}C$  NMR** (125.8 MHz,  $CDCl_3$ , 298 K)  $\delta$ : 175.4, 145. (br. d,  $J_{C-F} = 248.7$  Hz), 140.2 (br. d,  $J_{C-F} = 254.3$  Hz), 137.8 (br. d,  $J_{C-F} = 250.2$  Hz), 131.0, 127.3, 115.7 (br. s), 75.5, 62.1, 53.1, 18.7 (t,  $J_{C-F} = 6.4$  Hz), 17.9, 14.0 ppm.  **$^{19}F$  NMR** (376.5 MHz,  $CDCl_3$ , 298 K)  $\delta$ : -138.22 (d,  $J = 17.9$  Hz, 2F, Ar-F), -155.23 (t,  $J = 22.5$  Hz, 1F, Ar-F), -162.28 (ddd,  $J = 22.5, 17.8, 5.7$  Hz, 2F, Ar-F) ppm. **IR**  $\nu_{max}$  ( $cm^{-1}$ ): 3522 (OH), 2986, 2941, 2920, 2860, 1721 (C=O), 1655, 1524, 1487, 1383,

1302, 1248, 1231, 1175, 1126, 1098, 1067, 1018. **HRMS** (ES+) [M-OH]<sup>+</sup> [C<sub>15</sub>H<sub>14</sub>O<sub>2</sub>F<sub>5</sub>]<sup>+</sup>: calculated 321.0914, found 321.0916.

#### Synthesis of ethyl (*E*)-2-ethyl-3-hydroxy-2-methylhex-4-enoate (**2s**)

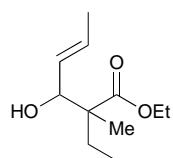

Synthesised in accordance with the *General Procedure* using BEt<sub>3</sub> (0.16 mL, 0.16 mmol, 1M in hexane), ethyl  $\alpha$ -diazomethylacetate (**1b**, 20 mg, 0.16 mmol), and crotonaldehyde (11 mg, 0.16 mmol) in CH<sub>2</sub>Cl<sub>2</sub> to afford **2s**. The crude reaction mixture was purified *via* preparative thin layer chromatography using hexane/ethyl acetate (90:10 v/v) as eluent. The desired compound **2s** (*dr*: 1:0.68) was obtained as a colourless oil. Yield combined: 9 mg, 0.5 mmol, 29%.

**<sup>1</sup>H NMR** (500.2 MHz, CDCl<sub>3</sub>, 298 K)  $\delta$ : 5.67–5.74 (m, 1H, CH), 5.49–5.54 (m, 1H, CH), 4.11–4.19 (m, 3H), 2.39 (d, *J* = 4.8 Hz, 1H), 1.80–1.87 (m, 1H, CH<sub>2</sub>), 1.71 (dd, *J* = 6.0, 1.0 Hz, 3H, CH<sub>3</sub>), 1.46–1.52 (m, 1H, CH<sub>2</sub>), 1.26 (t, *J* = 7.1 Hz, 3H, CH<sub>3</sub>), 1.13 (s, 3H, CH<sub>3</sub>), 0.87 ppm (t, *J* = 7.5 Hz, 3H, CH<sub>3</sub>). **<sup>13</sup>C NMR** (125.8 MHz, CDCl<sub>3</sub>, 298 K)  $\delta$  176.5, 129.7, 129.4, 77.8, 60.6, 51.0, 28.1, 18.0, 17.4, 14.4, 9.1 ppm. **IR**  $\nu_{\max}$  (cm<sup>-1</sup>): 3500 (OH), 2970, 2935, 2879, 2856, 1718 (C=O), 1458, 1381, 1323, 1300, 1323, 1300, 1232, 1155, 1139, 1112, 1091, 1026. **HRMS** (ASAP) [M-OH]<sup>+</sup> [C<sub>11</sub>H<sub>19</sub>O<sub>2</sub>]<sup>+</sup>: calculated 183.1385, found 183.1394.

#### Synthesis of ethyl 3-(4-fluorophenyl)-3-hydroxy-2-methyl-2-(2,4,6-trifluorophenyl)propanoate (**2i**)

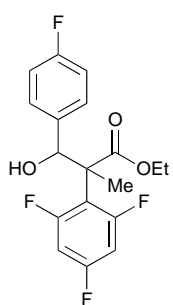

Synthesised in accordance with the *General Procedure* using B(2,4,6-F<sub>3</sub>C<sub>6</sub>H<sub>2</sub>)<sub>3</sub> (63 mg, 0.16 mmol), ethyl  $\alpha$ -diazomethylacetate (**1b**, 20 mg, 0.16 mmol), and 4-fluorobenzaldehyde (19 mg, 0.16 mmol) in CH<sub>2</sub>Cl<sub>2</sub> to afford **2i**. The crude reaction mixture was purified *via* preparative thin layer chromatography using hexane/ethyl acetate (95:5 v/v) as eluent. The desired compound **2i** (*dr*: 1:0.13) was obtained as a colourless oil. Yield combined: 31 mg, 0.09 mmol, 56%.

**<sup>1</sup>H NMR** (400.1 MHz, CDCl<sub>3</sub>, 298 K)  $\delta$ : 6.81–6.92 (m, 4H, Ar-H), 6.50–6.57 (m, 2H, Ar-H), 5.27 (d, *J* = 2.4 Hz, 1H), 4.74 (d, *J* = 2.4 Hz, 1H), 4.17–4.29 (m, 2H, CH<sub>2</sub>), 1.70 (t, *J* = 3.1 Hz, 3H, CH<sub>3</sub>), 1.22 (t, *J* = 7.1 Hz, 3H, CH<sub>3</sub>) ppm. **<sup>13</sup>C NMR** (125.8 MHz, CDCl<sub>3</sub>, 298 K)  $\delta$ : 177.8, 162.45 (d, *J*<sub>C-F</sub> = 249.2 Hz), 160.8–163.0 (m, 2C), 134.1 (d, *J*<sub>C-F</sub> = 3.3 Hz), 129.2 (d, *J*<sub>C-F</sub> = 8.1 Hz), 114.4 (d, *J*<sub>C-F</sub> = 21.4 Hz), 113.4 (dt, *J*<sub>C-F</sub> = 15.4, 5.2 Hz), 100.8 (ddd, *J*<sub>C-F</sub> = 25.2, 25.2, 3.1 Hz), 75.3, 62.0, 52.8 (t, *J*<sub>C-F</sub> = 3.2 Hz), 16.5 (t, *J*<sub>C-F</sub> = 6.3 Hz), 14.0 ppm. **<sup>19</sup>F NMR** (376.5 MHz,

CDCl<sub>3</sub>, 298 K)  $\delta$ : -105.60 (d,  $J = 7.4$  Hz, 2F, Ar-F), -108.65 (vt,  $J = 7.4$  Hz, 1F, Ar-F), -114.61 (s, 1F, Ar-F) ppm. **IR**  $\nu_{\max}$  (cm<sup>-1</sup>): 3516 (OH), 3103, 3061, 2986, 2905, 1713 (C=O), 1634, 1597, 1510, 1489, 1435, 1254, 1225, 1157, 1121, 1099, 1070, 1043, 1015, 1003. **HRMS** (ES+) [M-OH]<sup>+</sup> [C<sub>18</sub>H<sub>16</sub>O<sub>2</sub>F<sub>4</sub>]<sup>+</sup>: calculated 339.1008, found 339.1007.

*Synthesis of ethyl 3-(4-fluorophenyl)-3-hydroxy-2-methyl-2-(3,4,5-trifluorophenyl)propanoate (2j)*

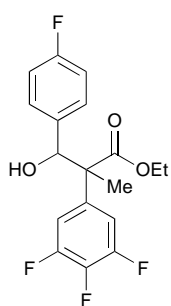

Synthesised in accordance with the *General Procedure* using B(3,4,5-F<sub>3</sub>C<sub>6</sub>H<sub>2</sub>)<sub>3</sub> (63 mg, 0.16 mmol), ethyl  $\alpha$ -diazomethylacetate (**1b**, 20 mg, 0.16 mmol), and 4-fluorobenzaldehyde (19 mg, 0.16 mmol) in CH<sub>2</sub>Cl<sub>2</sub> to afford **2j**. The crude reaction mixture was purified *via* preparative thin layer chromatography using hexane/ethyl acetate (95:5 v/v) as eluent. The desired compound **2j** (*dr*: 1:0.78) was obtained as a mixture of diastereomers as a colourless oil. Yield: 40 mg,

0.11 mmol, 72%.

*Note: Some signals of the major ( $\Delta$ ) and the minor (\*) isomer are overlapping.*

**<sup>1</sup>H NMR** (500.2 MHz, CDCl<sub>3</sub>, 298 K)  $\delta$ : 6.74–6.91 $\Delta$ \* (m, 6H, Ar-H), 6.31\* (s, 1H), 5.24 $\Delta$  (s, 1H), 4.16–4.29 (m, 2H, CH<sub>2</sub>), 3.63\* (br. s, 1H), 3.52 $\Delta$  (br. s, 1H), 1.46\* (s, 3H, CH<sub>3</sub>), 1.42 $\Delta$  (s, 3H, CH<sub>3</sub>), 1.20–1.24 $\Delta$ \* (m, 3H, CH<sub>3</sub>) ppm. **<sup>13</sup>C NMR** (125.8 MHz, CDCl<sub>3</sub>, 298 K)  $\delta$ : 175.9\*, 175.7 $\Delta$ , 162.6 $\Delta$  (d,  $J_{C-F} = 246.6$  Hz), 162.4\* (d,  $J_{C-F} = 246.6$  Hz), 151.1\* (ddd,  $J_{C-F} = 250.8, 9.9, 10.2$  Hz), 150.5 $\Delta$  (ddd,  $J_{C-F} = 248.6, 9.6, 9.8$  Hz), 137.9–140.2 $\Delta$ \* (m,  $J_{C-F} = 251.8$  Hz), 136.5–136.6\* (m), 136.5–136.6\* (m), 134.4–134.6 $\Delta$  (m), 134.1 $\Delta$  (d,  $J_{C-F} = 3.3$  Hz), 133.7\* (d,  $J_{C-F} = 3.3$  Hz), 129.8 $\Delta$  (d,  $J_{C-F} = 8.2$  Hz), 129.1\* (d,  $J_{C-F} = 8.1$  Hz), 114.7 $\Delta$  (d,  $J_{C-F} = 21.3$  Hz), 114.5\* (d,  $J_{C-F} = 21.3$  Hz), 112.9 $\Delta$  (dd,  $J_{C-F} = 17.2, 5.1$  Hz), 111.5\* (dd,  $J_{C-F} = 17.3, 5.1$  Hz), 77.8\*, 77.7 $\Delta$ , 62.2\*, 62.0 $\Delta$ , 56.1\*, 55.4 $\Delta$ , 19.9 $\Delta$ \*, 14.8\*, 14.0 $\Delta$  ppm. **<sup>19</sup>F NMR** (470.6 MHz, CDCl<sub>3</sub>, 298 K)  $\delta$ : -113.86–-113.80 $\Delta$  (m, 1F, Ar-F), -114.47–-114.41\* (m, 1F, Ar-F), -133.44\* (dd,  $J = 20.7, 8.8$  Hz, 2F, Ar-F), -135.05 $\Delta$  (dd,  $J = 20.6, 9.4$  Hz, 2F, Ar-F), -161.08–-160.97\* (m, 1F, Ar-F), -161.87–-161.75 $\Delta$  (m, 1F, Ar-F) ppm. **IR**  $\nu_{\max}$  (cm<sup>-1</sup>): 3501 (OH), 3086, 3049, 2986, 2938, 2909, 1713 (C=O), 1620, 1605, 1530, 1510, 1466, 1433, 1342, 1225, 1159, 1107, 1076, 1036. **HRMS** (ASAP+) [M-OH]<sup>+</sup> [C<sub>18</sub>H<sub>15</sub>O<sub>2</sub>F<sub>4</sub>]<sup>+</sup>: calculated 339.1008, found 339.1020.

Synthesis of ethyl 3-hydroxy-2-methyl-3-(4-(trifluoromethyl)phenyl)-2-(3,4,5-trifluorophenyl)propanoate (**2k**)

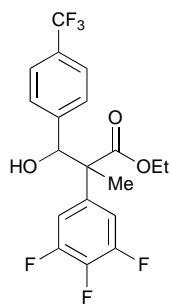

Synthesised in accordance with the *General Procedure* using B(3,4,5-F<sub>3</sub>C<sub>6</sub>H<sub>2</sub>)<sub>3</sub> (63 mg, 0.16 mmol), ethyl  $\alpha$ -diazomethylacetate (**1b**, 20 mg, 0.16 mmol), and 4-trifluoromethylbenzaldehyde (27 mg, 0.16 mmol) in CH<sub>2</sub>Cl<sub>2</sub> to afford **2k**. The crude reaction mixture was purified *via* preparative thin layer chromatography using hexane/ethyl acetate (95:5 v/v) as eluent. The desired compound **2k** (*dr*: 1:1) was obtained as a mixture of diastereomers as a colourless oil. Yield: 34 mg, 0.08 mmol, 54%.

*Note: Some signals of the one ( $\Delta$ ) and the other (\*) isomer are overlapping.*

**<sup>1</sup>H NMR** (400.1 MHz, CDCl<sub>3</sub>, 298 K)  $\delta$ : 7.56 $\Delta$  (d,  $J$  = 8.3 Hz, 2H, Ar-H), 7.41\* (d,  $J$  = 8.2 Hz, 2H, Ar-H), 7.04\* (d,  $J$  = 8.2 Hz, 2H, Ar-H), 6.94 $\Delta$  (d,  $J$  = 8.3 Hz, 2H, Ar-H), 6.76–6.85 $\Delta$ \* (m, 2H, Ar-H), 5.40 $\Delta$  (d,  $J$  = 3.6 Hz, 1H), 5.32\* (d,  $J$  = 3.2 Hz, 1H), 4.16–4.31 $\Delta$ \* (m, 2H, CH<sub>2</sub>), 3.72 $\Delta$  (d,  $J$  = 3.6 Hz, 1H), 3.59\* (d,  $J$  = 3.2 Hz, 1H), 1.46 $\Delta$  (s, 3H, CH<sub>3</sub>), 1.44\* (s, 3H, CH<sub>3</sub>), 1.20–1.25 $\Delta$ \* (m, 3H, CH<sub>3</sub>) ppm. **<sup>13</sup>C NMR** (125.8 MHz, CDCl<sub>3</sub>, 298 K)  $\delta$ : 175.8 $\Delta$ , 175.5\*, 151.2 $\Delta$  (dd,  $J_{C-F}$  = 250.3, 9.8 Hz), 150.6\* (dd,  $J_{C-F}$  = 249.4, 9.7 Hz), 142.3\* (d,  $J_{C-F}$  = 1.4 Hz), 142.0 $\Delta$  (d,  $J_{C-F}$  = 1.4 Hz), 139.2 $\Delta$  (dd,  $J_{C-F}$  = 252.3, 9.7 Hz), 139.2\* (dd,  $J_{C-F}$  = 252.3, 9.7 Hz), 136.1–136.3\* (m), 134.3 $\Delta$  (m), 130.5\* (q,  $J_{C-F}$  = 32.8 Hz), 130.1 $\Delta$  (q,  $J_{C-F}$  = 32.5 Hz), 128.5\*, 127.9 $\Delta$ , 124.7\* (q,  $J_{C-F}$  = 3.8 Hz), 124.5 $\Delta$  (q,  $J_{C-F}$  = 3.8 Hz), 124.1\* (q,  $J_{C-F}$  = 272.3 Hz), 124.1 $\Delta$  (q,  $J_{C-F}$  = 272.3 Hz), 112.9 $\Delta$  (dd,  $J_{C-F}$  = 16.5, 5.4 Hz), 111.5\* (dd,  $J_{C-F}$  = 16.5, 5.2 Hz), 77.9\*, 77.8 $\Delta$ , 62.3 $\Delta$ , 62.2\*, 56.0 $\Delta$ , 55.2\*, 19.7 $\Delta$ , 19.7\*, 14.7\*, 14.0 $\Delta$  ppm. **<sup>19</sup>F NMR** (376.5 MHz, CDCl<sub>3</sub>, 298 K)  $\delta$ : -62.60 $\Delta$  (s, 3F, CF<sub>3</sub>), -62.61\* (s, 3F, CF<sub>3</sub>), -133.01 $\Delta$  (d,  $J$  = 20.8 Hz, 2F, Ar-F), -134.69\* (d,  $J$  = 20.9 Hz, 2F, Ar-F), -160.52 $\Delta$  (vt,  $J$  = 20.8 Hz, 1F, Ar-F), -161.39\* (vt,  $J$  = 20.9 Hz, 1F, Ar-F) ppm. **IR**  $\nu_{max}$  (cm<sup>-1</sup>): 3505 (OH), 3057, 2988, 2941, 2907, 1703 (C=O), 1620, 1531, 1435, 1323, 1244, 1165, 1125, 1067, 1038, 1016. **HRMS** (ASAP+) [M+Na]<sup>+</sup> [C<sub>19</sub>H<sub>16</sub>O<sub>3</sub>F<sub>6</sub>]<sup>+</sup>: calculated 429.0901, found 429.0907.

Synthesis of ethyl 3-hydroxy-3-(4-methoxyphenyl)-2-methyl-2-(3,4,5-trifluorophenyl)propanoate (**2l**)

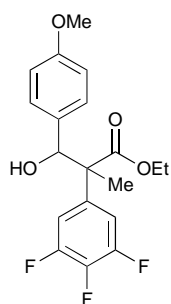

Synthesised in accordance with the *General Procedure* using B(3,4,5-F<sub>3</sub>C<sub>6</sub>H<sub>2</sub>)<sub>3</sub> (63 mg, 0.16 mmol), ethyl  $\alpha$ -diazomethylacetate (**1b**, 20 mg, 0.16 mmol), and 4-methoxybenzaldehyde (21 mg, 0.16 mmol) in CH<sub>2</sub>Cl<sub>2</sub> to afford **2l**. The crude reaction mixture was purified *via* preparative thin layer chromatography using hexane/ethyl acetate (90:10 v/v) as eluent. The desired compound **2l** (*dr*: 1:0.61) was obtained as a colourless oil. Yield: 29 mg, 0.08 mmol, 50%.

*Note: Some signals of the one ( $\Delta$ ) and the other (\*) isomer overlap.*

**<sup>1</sup>H NMR** (500.2 MHz, CDCl<sub>3</sub>, 298 K)  $\delta$ : 6.67–6.87 $\Delta$ \* (m, 6H, Ar-H), 5.28\* (d,  $J$  = 3.6 Hz, 1H), 5.22 $\Delta$  (d,  $J$  = 3.0 Hz, 1H), 4.15–4.28 $\Delta$ \* (m, 2H, CH<sub>2</sub>), 3.76 $\Delta$  (s, 3H, OCH<sub>3</sub>), 3.75\* (s, 3H, OCH<sub>3</sub>), 3.52\* (d,  $J$  = 3.6 Hz, 1H), 3.38 $\Delta$  (d,  $J$  = 3.0 Hz, 1H), 1.47\* (s, 3H, CH<sub>3</sub>), 1.42 $\Delta$  (s, 3H, CH<sub>3</sub>), 1.20–1.24 $\Delta$ \* (m, 3H, CH<sub>3</sub>) ppm. **<sup>13</sup>C NMR** (125.8 MHz, CDCl<sub>3</sub>, 298 K)  $\delta$ : 175.9\*, 175.7 $\Delta$ , 159.5 $\Delta$ , 159.2\*, 151.0\* (ddd,  $J_{C-F}$  = 249.6, 9.8, 4.2 Hz), 150.4 $\Delta$  (ddd,  $J_{C-F}$  = 248.2, 9.9, 4.1 Hz), 139.0 $\Delta$ \* (br. d.  $J_{C-F}$  = 248.2 and 249.6 Hz), 136.8–137.0\* (m), 134.9–135.0 $\Delta$  (m), 130.5 $\Delta$ , 130.0\*, 129.2 $\Delta$ , 128.6\*, 113.1 $\Delta$ , 130.0 $\Delta$  (dd,  $J_{C-F}$  = 17.3, 4.9 Hz), 111.5\* (dd, 17.2, 5.4 Hz), 78.0\*, 78.0 $\Delta$ , 62.0\*, 61.9 $\Delta$ , 56.2\*, 55.5 $\Delta$ , 55.3 $\Delta$ , 55.3\*, 20.0 $\Delta$ \*, 15.0\*, 14.0 $\Delta$  ppm. **<sup>19</sup>F NMR** (470.6 MHz, CDCl<sub>3</sub>, 298 K)  $\delta$ : -133.88\* (dd,  $J$  = 21.4, 10.2 Hz, 2F, Ar-F), -135.45 $\Delta$  (dd,  $J$  = 20.8, 10.0 Hz, 2F, Ar-F), -161.53\* (tt,  $J$  = 21.4, 6.5 Hz, 1F, Ar-F), -162.29 $\Delta$  (tt,  $J$  = 20.8, 6.7 Hz, 1F, Ar-F) ppm. **IR**  $\nu_{max}$  (cm<sup>-1</sup>): 3501 (OH), 3080, 3040, 2984, 2957, 2938, 2907, 2839 (OCH<sub>3</sub>), 1717 (C=O), 1612, 1530, 1514, 1466, 1433, 1341, 1246, 1175, 1105, 1076, 1034. **HRMS** (ASAP+) [M-OH]<sup>+</sup> [C<sub>19</sub>H<sub>18</sub>O<sub>3</sub>F<sub>3</sub>]<sup>+</sup>: calculated 351.1208, found 351.1210.

Synthesis of ethyl 2,3-bis(4-fluorophenyl)-3-hydroxy-2-methylpropanoate (**2m**)

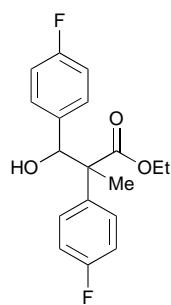

Synthesised in accordance with the *General Procedure* using B(4-FC<sub>6</sub>H<sub>4</sub>)<sub>3</sub> (46 mg, 0.16 mmol), ethyl  $\alpha$ -diazomethylacetate (**1b**, 20 mg, 0.16 mmol), and 4-fluorobenzaldehyde (19 mg, 0.16 mmol) in CH<sub>2</sub>Cl<sub>2</sub> to afford **2m**. The crude reaction mixture was purified *via* preparative thin layer chromatography using hexane/ethyl acetate (95:5 v/v) as eluent. The desired compound **2m** (*dr*: 1:0.81) was obtained as a colourless oil. Yield: 33 mg, 0.10 mmol, 66%.

*Note: Some signals of the major ( $\Delta$ ) and the minor (\*) isomer overlap.*

**<sup>1</sup>H NMR** (500.2 MHz, CDCl<sub>3</sub>, 298 K) δ: 7.07–7.12<sup>Δ</sup> (m, 2H, Ar-H), 7.02–7.05\* (m, 2H, Ar-H), 6.93–6.99<sup>Δ\*</sup> (m, 2H, Ar-H), 6.76–6.86<sup>Δ\*</sup> (m, 4H<sup>Δ</sup> and 2H\*, Ar-H), 6.70–6.74<sup>Δ\*</sup> (m, 2H, Ar-H), 5.36\* (d, *J* = 3.4 Hz, 1H), 5.24<sup>Δ</sup> (d, *J* = 2.9 Hz, 1H), 4.15–4.27<sup>Δ\*</sup> (m, 2H, CH<sub>2</sub>), 3.79\* (d, *J* = 3.4 Hz, 1H), 3.70<sup>Δ</sup> (d, *J* = 2.9 Hz, 1H), 1.49\* (s, 3H, CH<sub>3</sub>), 1.46<sup>Δ</sup> (s, 3H, CH<sub>3</sub>), 1.19–1.22<sup>Δ\*</sup> (m, 3H, CH<sub>3</sub>) ppm. **<sup>13</sup>C NMR** (125.8 MHz, CDCl<sub>3</sub>, 298 K) δ: 177.2\*, 176.9<sup>Δ</sup>, 162.5<sup>Δ</sup> (d, *J*<sub>C-F</sub> = 246.2 Hz), 162.4<sup>Δ</sup> (d, *J*<sub>C-F</sub> = 246.6 Hz), 162.2\* (d, *J*<sub>C-F</sub> = 245.9 Hz), 162.1\* (d, *J*<sub>C-F</sub> = 245.9 Hz), 135.8<sup>Δ</sup> (d, *J*<sub>C-F</sub> = 3.4 Hz), 134.5<sup>Δ</sup> (d, *J*<sub>C-F</sub> = 3.1 Hz), 134.1\* (d, *J*<sub>C-F</sub> = 3.2 Hz), 133.5\* (d, *J*<sub>C-F</sub> = 3.3 Hz), 130.0<sup>Δ</sup> (d, *J*<sub>C-F</sub> = 8.1 Hz), 129.9<sup>Δ</sup> (d, *J*<sub>C-F</sub> = 8.2 Hz), 129.3\* (d, *J*<sub>C-F</sub> = 8.2 Hz), 128.6\* (d, *J*<sub>C-F</sub> = 8.2 Hz), 115.4\* (d, *J*<sub>C-F</sub> = 21.2 Hz), 114.6<sup>Δ</sup> (d, *J*<sub>C-F</sub> = 21.2 Hz), 114.3<sup>Δ</sup> (d, *J*<sub>C-F</sub> = 21.3 Hz), 114.1\* (d, *J*<sub>C-F</sub> = 21.4 Hz), 78.0\*, 78.0<sup>Δ</sup>, 61.7\*, 61.7<sup>Δ</sup>, 56.0\*, 55.1<sup>Δ</sup>, 20.0<sup>Δ\*</sup>, 14.7\*, 14.1<sup>Δ</sup> ppm. **<sup>19</sup>F NMR** (470.6 MHz, CDCl<sub>3</sub>, 298 K) δ: -114.58–-114.52<sup>Δ</sup> (m, 1F, Ar-F), -114.86–-114.80\* (m, 1F, Ar-F), -115.33–-115.25<sup>Δ\*</sup> (m, 1F, Ar-F) ppm. **IR** *v*<sub>max</sub> (cm<sup>-1</sup>): 3510 (OH), 3075, 3049, 2984, 2938, 2907, 1705 (C=O), 1603, 1508, 1466, 1296, 1223, 1157, 1111, 1092, 1042, 1015. **HRMS** (ASAP+) [M-OH]<sup>+</sup> [C<sub>18</sub>H<sub>17</sub>O<sub>2</sub>F<sub>2</sub>]<sup>+</sup>: calculated 303.1197, found 303.1202.

*Synthesis of ethyl 3-(4-fluorophenyl)-3-hydroxy-2-methyl-2-(pentafluorophenyl)butanoate (2n)*

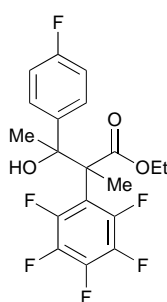

Synthesised in accordance with the *General Procedure* using B(C<sub>6</sub>F<sub>5</sub>)<sub>3</sub> (80 mg, 0.16 mmol), ethyl α-diazomethylacetate (**1b**, 20 mg, 0.16 mmol), and 4-fluoroacetophenone (22 mg, 0.16 mmol) in CH<sub>2</sub>Cl<sub>2</sub> to afford **2n**. The crude reaction mixture was purified *via* preparative thin layer chromatography using hexane/ethyl acetate (95:5 v/v) as eluent. The desired compound **2n** (*dr*: 1:0.85) was obtained as a colourless oil. Yield combined: 34 mg, 0.08 mmol,

54%.

**<sup>1</sup>H NMR** (500.2 MHz, CDCl<sub>3</sub>, 298 K) δ: 7.08–7.11 (m, 2H, Ar-H), 6.84–6.88 (m, 2H, Ar-H), 4.51 (s, 1H, OH), 4.18–4.29 (m, 2H, CH<sub>2</sub>), 1.92 (s, 3H, CH<sub>3</sub>), 1.81 (t, *J* = 3.2 Hz, 3H, CH<sub>3</sub>), 1.23 (t, *J* = 7.0 Hz, 3H, CH<sub>3</sub>) ppm. **<sup>13</sup>C NMR** (125.8 MHz, CDCl<sub>3</sub>, 298 K) δ: 175.3, 162.3 (d, *J*<sub>C-F</sub> = 248.1 Hz), 146.5 (br. d, *J*<sub>C-F</sub> = 246.7 Hz), 140.1 (br. d, *J*<sub>C-F</sub> = 253.4 Hz), 138.4 (d, *J*<sub>C-F</sub> = 2.9 Hz), 137.4 (br. d, *J*<sub>C-F</sub> = 250.1 Hz), 128.7 (d, *J*<sub>C-F</sub> = 7.9 Hz), 115.4 (br. s), 114.2 (d, *J*<sub>C-F</sub> = 21.2 Hz), 78.7, 62.1, 56.7, 24.7, 22.0 (t, *J*<sub>C-F</sub> = 6.1 Hz), 14.0 ppm. **<sup>19</sup>F NMR** (470.2 MHz, CDCl<sub>3</sub>, 298 K) δ: -115.24 (s, 1F, Ar-F), -135.48\* (br. s, 2F, Ar-F), -154.97 (t, *J* = 22.4 Hz, 1F, Ar-F), -163.16 (dt, *J* = 22.4, 6.9 Hz, 2F, Ar-F) ppm. \*Note: signal is very broad and the integration does not fit. **IR** *v*<sub>max</sub> (cm<sup>-1</sup>): 3537 (OH), 3051, 2992, 2957, 2930, 2857, 1724 (C=O),

1653, 1605, 1524, 1508, 1485, 1366, 1302, 1229, 1163, 1134, 1094, 1015. **HRMS** (ASAP+) [M-OH]<sup>+</sup> [C<sub>19</sub>H<sub>15</sub>O<sub>2</sub>F<sub>6</sub>]<sup>+</sup>: calculated 389.0976, found 389.0984.

#### Synthesis of ethyl 2-ethyl-3-(4-fluorophenyl)-3-hydroxy-2-methylbutanoate (**2t**)

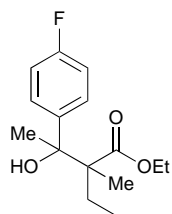

Synthesised in accordance with the *General Procedure* using BEt<sub>3</sub> (0.16 mL, 0.16 mmol, 1M in hexane), ethyl  $\alpha$ -diazomethylacetate (**1b**, 20 mg, 0.16 mmol), and 4-fluoroacetophenone (22 mg, 0.16 mmol) in CH<sub>2</sub>Cl<sub>2</sub> to afford **2t**. The crude reaction mixture was purified *via* preparative thin layer chromatography using hexane/ethyl acetate (95:5 v/v) as eluent. The desired compound **2t** (*dr*: 1:0.61) was obtained as a colourless oil. Yield combined: 28 mg, 0.10 mmol, 67%.

**<sup>1</sup>H NMR** (500.2 MHz, CDCl<sub>3</sub>, 298 K)  $\delta$ : 7.30–7.35 (m, 2H, Ar-H), 6.94–6.99 (m, 2H, Ar-H), 4.58 (s, 1H, OH), 3.97–4.08 (m, 2H, CH<sub>2</sub>), 2.21–2.28 (m, 1H, CH<sub>2</sub>), 1.56 (s, 3H, CH<sub>3</sub>) 1.35–1.43 (m, 2H, CH<sub>2</sub>), 1.12 (t, *J* = 7.1 Hz, 3H, CH<sub>3</sub>), 1.09 (s, 3H, CH<sub>3</sub>), 0.82 ppm (t, *J* = 7.5 Hz, 3H, CH<sub>3</sub>). **<sup>13</sup>C NMR** (125.8 MHz, CDCl<sub>3</sub>, 298 K)  $\delta$ : 177.2, 161.9 (d, *J*<sub>C-F</sub> = 245.8 Hz), 141.0 (d, *J*<sub>C-F</sub> = 3.3 Hz), 128.6 (d, *J*<sub>C-F</sub> = 8.2 Hz), 114.3 (d, *J*<sub>C-F</sub> = 21.4 Hz), 77.5, 61.0, 54.9, 27.2, 24.0, 16.9, 14.1, 9.7 ppm. **<sup>19</sup>F NMR** (470.6 MHz, CDCl<sub>3</sub>, 298 K)  $\delta$ : -116.65–-116.59 ppm. **IR**  $\nu_{\max}$  (cm<sup>-1</sup>): 3300 (OH), 2982, 2943 2883, 1714 (C=O), 1689, 1600, 1508, 1462, 1382, 1367, 1307, 1224, 1188, 1145, 1089, 1047, 1014. **HRMS** (GC-MS) [M-OH]<sup>+</sup> [C<sub>15</sub>H<sub>20</sub>O<sub>2</sub>F]<sup>+</sup>: calculated 251.14418, found 251.1442.

#### Synthesis of ethyl 2-(1-hydroxycyclohexyl)-2-(pentafluorophenyl)propanoate (**2o**)

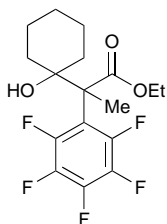

Synthesised in accordance with the *General Procedure* using B(C<sub>6</sub>F<sub>5</sub>)<sub>3</sub> (80 mg, 0.16 mmol), ethyl  $\alpha$ -diazomethylacetate (**1b**, 20 mg, 0.16 mmol), and cyclohexanone (15 mg, 0.16 mmol) in CH<sub>2</sub>Cl<sub>2</sub> to afford **2o**. The crude reaction mixture was purified *via* preparative thin layer chromatography using hexane/ethyl acetate (95:5 v/v) as eluent. The desired compound **2o** was obtained as a colourless oil. Yield: 23 mg, 0.06 mmol, 40%.

**<sup>1</sup>H NMR** (400.1 MHz, CDCl<sub>3</sub>, 298 K)  $\delta$ : 4.12–4.24 (m, 2H, CH<sub>2</sub>), 3.58 (br. s, 1H, OH), 2.13 (d, *J* = 13.1 Hz, 1H, Cy-H), 1.79 (t, *J* = 3.1 Hz, 3H, CH<sub>3</sub>), 1.60–1.75 (m, 4H, Cy-H), 1.43–1.54 (m, 2H, Cy-H), 1.19–1.34 (m, 5H, Cy-H, CH<sub>3</sub>), 0.95–1.06 (m, 1H, Cy-H) ppm. **<sup>13</sup>C NMR** (128.5 MHz, CDCl<sub>3</sub>, 298 K)  $\delta$ : 175.3, 146.4 (br. d, *J*<sub>C-F</sub> = 247.7 Hz), 140.2 (br. d, *J*<sub>C-F</sub> = 254.3

Hz), 137.2 (br. d,  $J_{C-F} = 249.2$  Hz), 115.9 (t,  $J_{C-F} = 13.7$  Hz), 76.5, 61.7, 56.5, 32.0, 31.5, 25.8, 21.7, 21.5, 21.1 (t,  $J_{C-F} = 6.0$  Hz), 14.0 ppm.  $^{19}\text{F}$  NMR (376.5 MHz,  $\text{CDCl}_3$ , 298 K)  $\delta$ : -135.12\* (br. s, 2F, Ar-F), -155.25 (t,  $J = 21.0$  Hz, 1F, Ar-F), -162.37 (s, 2F, Ar-F) ppm. \*Note: signal is very broad and the integration does not fit. IR  $\nu_{\text{max}}$  ( $\text{cm}^{-1}$ ): 3532 (OH), 2938, 2862, 1721 (C=O), 1653, 1524, 1483, 1387, 1300, 1238, 1150, 1119, 1099, 1074, 1032. HRMS (ES+)  $[\text{M-OH}]^+$   $[\text{C}_{17}\text{H}_{18}\text{O}_2\text{F}_5]^+$ : calculated 349.1227, found 349.1218.

#### Synthesis of ethyl 3-hydroxy-2,3-dimethyl-2-(pentafluorophenyl)butanoate (**2p**)

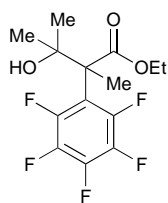

Synthesised in accordance with the *General Procedure* using  $\text{B}(\text{C}_6\text{F}_5)_3$  (80 mg, 0.16 mmol), ethyl  $\alpha$ -diazomethylacetate (**1b**, 20 mg, 0.16 mmol), and acetone (9 mg, 0.16 mmol) in  $\text{CH}_2\text{Cl}_2$  to afford **2p**. The crude reaction mixture was purified *via* preparative thin layer chromatography using hexane/ethyl acetate (90:10 v/v) as eluent. The desired compound **2p** was obtained as a colourless oil. Yield: 25 mg, 0.08 mmol, 49%.

$^1\text{H}$  NMR (400.1 MHz,  $\text{CDCl}_3$ , 298 K)  $\delta$ : 4.14–4.27 (m, 2H, Et- $\text{CH}_2$ ), 3.90 (br. s, 1H, OH), 1.80 (t,  $J = 3.1$  Hz, 3H,  $\text{CH}_3$ ), 1.35 (s, 3H,  $\text{CH}_3$ ), 1.20–1.23 (m, 6H, 2  $\times$   $\text{CH}_3$ ) ppm.  $^{13}\text{C}$  NMR (125.8 MHz,  $\text{CDCl}_3$ , 298 K)  $\delta$ : 175.2, 146.4 (br. d,  $J_{C-F} = 246.6$  Hz), 140.2 (br. d,  $J_{C-F} = 252.8$  Hz), 137.8 (br. d,  $J_{C-F} = 250.2$  Hz), 116.0 (t,  $J_{C-F} = 17.7$  Hz), 75.5, 61.8, 55.7, 25.9, 25.4, 21.8 (t,  $J_{C-F} = 6.4$  Hz), 14.0 ppm.  $^{19}\text{F}$  NMR (376.5 MHz,  $\text{CDCl}_3$ , 298 K)  $\delta$ : -134.53\* (br. s 2F, Ar-F), -155.16 (s, 1F, Ar-F), -162.35 (s, 2F, Ar-F) ppm. \*Note: signal is very broad and the integration does not fit. IR  $\nu_{\text{max}}$  ( $\text{cm}^{-1}$ ): 3534 (OH), 2986, 2945, 2911, 1722 (C=O), 1653, 1524, 1485, 1375, 1302, 1236, 1152, 1096, 1059, 1020. HRMS (ASAP+)  $[\text{M-OH}]^+$   $[\text{C}_{14}\text{H}_{14}\text{O}_2\text{F}_5]^+$ : calculated 309.0914, found 309.0919.

#### Synthesis of ethyl 3-hydroxy-2,3-dimethyl-2-(pentafluorophenyl)pent-4-enoate (**2q**)

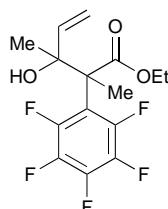

Synthesised in accordance with the *General Procedure* using  $\text{B}(\text{C}_6\text{F}_5)_3$  (80 mg, 0.16 mmol), ethyl  $\alpha$ -diazomethylacetate (**1b**, 20 mg, 0.16 mmol), and 3-buten-2-one (11 mg, 0.16 mmol) in  $\text{CH}_2\text{Cl}_2$  to afford **2q**. The crude reaction mixture was purified *via* preparative thin layer chromatography using hexane/ethyl acetate (95:5 v/v) as eluent. The desired compound **2q** (*dr*: 1:0.18) was obtained as a mixture of diastereomers as a colourless oil. Yield combined: 21 mg, 0.06 mmol, 40%.



Note: Some signals of the major ( $\Delta$ ) and the minor ( $*$ ) isomer overlap. The carbon signals of the  $C_6F_5$  substituent of the minor  $*$  compound are too broad to be observed in the  $^{13}C$  NMR.

$^1H$  NMR (400.1 MHz,  $CDCl_3$ , 298 K)  $\delta$ : 6.05 $*$  (dd,  $J = 16.3, 10.8$  Hz, 1H, CH), 5.95 $\Delta$  (dd,  $J = 16.5, 10.9$  Hz, 1H, CH), 5.32 $\Delta$  (dd,  $J = 16.5, 1.1$  Hz, 1H,  $CH_2$ ), 5.19 $\Delta$  (dd,  $J = 10.9, 1.3$  Hz, 1H,  $CH_2$ ), 5.12 $*$  (dd,  $J = 16.3, 1.4$  Hz, 1H,  $CH_2$ ), 5.04 $*$  (dd,  $J = 10.8, 1.4$  Hz, 1H,  $CH_2$ ), 4.15–4.26 $\Delta*$  (m, 2H,  $CH_2$ ), 3.95 $\Delta$  (br. s, 1H, OH), 3.88 $*$  (br. s, 1H, OH), 1.81 $*$  (t,  $J = 3.2$  Hz, 3H,  $CH_3$ ), 1.78 $\Delta$  (t,  $J = 3.2$  Hz, 3H,  $CH_3$ ), 1.43 $*$  (s, 3H,  $CH_3$ ), 1.33 $\Delta$  (s, 3H,  $CH_3$ ), 1.22 $\Delta*$  (t,  $J = 7.2$  Hz, 3H,  $CH_3$ ) ppm.  $^{13}C$  NMR (125.8 MHz,  $CDCl_3$ , 298 K)  $\delta$ : 175.1 $\Delta$ , 174.9 $*$ , 146.3 $\Delta$  (br. d,  $J_{C-F} = 247.2$  Hz), 140.3 $\Delta$  (br. d,  $J_{C-F} = 250.6$  Hz), 140.0 $*$ , 139.8 $\Delta$ , 137.8 $\Delta$  (br. d,  $J_{C-F} = 253.4$  Hz), 115.5 $\Delta$  (br. s), 115.2 $\Delta$ , 114.6 $*$ , 77.4 $\Delta*$ , 66.0 $*$ , 61.9 $\Delta$ , 55.7 $*$ , 55.3 $\Delta$ , 24.1 $\Delta$ , 23.2 $*$ , 21.9 $\Delta$  (t,  $J_{C-F} = 6.4$  Hz), 21.6 $*$  (t,  $J_{C-F} = 6.2$  Hz), 15.4 $*$ , 14.0 $\Delta$  ppm.  $^{19}F$  NMR (376.5 MHz,  $CDCl_3$ , 298 K)  $\delta$ : -133.82 $\Delta*$  (br. s, 2F, Ar-F), -154.88 $\Delta$  (t,  $J = 21.0$  Hz, 1F, Ar-F), -155.25 $*$  (t,  $J = 21.0$  Hz, 1F, Ar-F), -162.30 $\Delta$  (br. s, 2F, Ar-F), -162.74 $*$  (br. s, 2F, Ar-F) ppm. IR  $\nu_{max}$  ( $cm^{-1}$ ): 3524 (OH), 3092, 2988, 2943, 2911, 1721 (C=O), 1653, 1524, 1485, 1414, 1369, 1302, 1238, 1084. HRMS (ES+)  $[M-OH]^+$   $[C_{15}H_{14}O_2F_5]^+$ : calculated 321.0914, found 321.0913.

### 2.3 Synthesis and spectral characterisation of $\alpha$ -aryl $\beta$ -keto esters

#### Synthesis of ethyl 2-methyl-3-oxo-2-(pentafluorophenyl)-3-phenylpropanoate (**3b**)

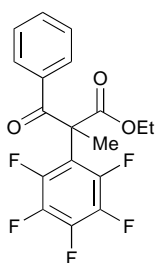

Synthesised in accordance with the *General Procedure* using  $B(C_6F_5)_3$  (80 mg, 0.16 mmol), ethyl  $\alpha$ -diazomethylacetate (**1b**, 20 mg, 0.16 mmol), and benzoic anhydride (35 mg, 0.16 mmol) in  $CH_2Cl_2$  to afford **3b**. The crude reaction mixture was purified *via* preparative thin layer chromatography using hexane/ethyl acetate (95:5 v/v) as eluent. The desired compound **3b** was obtained as a colourless oil. Yield: 35 mg, 0.09 mmol, 60%.

Note: **3b** can also be synthesised using benzoyl chloride (22 mg, 0.16 mmol) in 9% yield, or benzonitrile (16 mg, 0.16 mmol) after an additional acidic work up with HCl (1 M) in 36% yield.

$^1H$  NMR (500.2 MHz,  $CDCl_3$ , 298 K)  $\delta$ : 7.77–7.79 (m, 2H, Ar-H), 7.50–7.53 (m, 1H, Ar-H), 7.35–7.39 (m, 2H, Ar-H), 4.16–4.26 (m, 2H,  $CH_2$ ), 1.95 (s, 3H,  $CH_3$ ), 1.14 (t,  $J = 7.2$  Hz, 3H,  $CH_3$ ) ppm.  $^{13}C$  NMR (125.8 MHz,  $CDCl_3$ , 298 K)  $\delta$ : 194.0, 169.4, 144.9 (br. d,  $J_{C-F} = 251.5$  Hz), 140.8 (br. d,  $J_{C-F} = 256.0$  Hz), 136.2 (br. d,  $J_{C-F} = 253.3$  Hz), 153.3, 133.1, 129.0, 128.4, 116.0 (br. s), 63.0, 59.3, 23.1, 13.7 ppm.  $^{19}F$  NMR (470.2 MHz,  $CDCl_3$ , 298 K)  $\delta$ : -134.82 (d,  $J = 17.8$  Hz, 2F, Ar-F), -154.11 (t,  $J = 22.5$  Hz, 1F, Ar-F), -161.26–161.14 (m, 2F, Ar-F) ppm.

**IR**  $\nu_{\max}$  (cm<sup>-1</sup>): 3061, 2986, 2945, 2907, 1742 (C=O), 1692 (C=O), 1655, 1597, 1524, 1489, 1449, 1381, 1306, 1244, 1215, 1163, 1099, 1076. **HRMS** (ES<sup>+</sup>) [M+H]<sup>+</sup> [C<sub>18</sub>H<sub>14</sub>O<sub>3</sub>F<sub>5</sub>]<sup>+</sup>: calculated 373.0863, found 373.0865.

#### Synthesis of ethyl 2-benzoyl-2-methylbutanoate (**3g**)

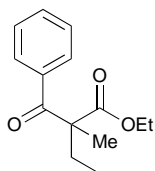

Synthesised in accordance with the *General Procedure* using BEt<sub>3</sub> (0.16 mL, 0.16 mmol, 1M in hexane), ethyl  $\alpha$ -diazomethylacetate (**1b**, 20 mg, 0.16 mmol), and benzoic anhydride (35 mg, 0.16 mmol) in CH<sub>2</sub>Cl<sub>2</sub> to afford **3g**. The crude reaction mixture was purified *via* preparative thin layer chromatography using hexane/ethyl acetate (95:5 v/v) as eluent. The desired compound **3g** was obtained as a colourless oil. Yield: 21 mg, 0.9 mmol, 57%.

**<sup>1</sup>H NMR** (500.2 MHz, CDCl<sub>3</sub>, 298 K)  $\delta$ : 7.81–7.84 (m, 2H, Ar-H), 7.48–7.52 (m, 1H, Ar-H), 7.37–7.42 (m, 2H, Ar-H), 4.11 (q,  $J$  = 7.1 Hz, 2H, CH<sub>2</sub>), 2.07 (dq,  $J$  = 7.5, 1.8 Hz, 2H, CH<sub>2</sub>), 1.50 (s, 3H, CH<sub>3</sub>), 1.04 (t,  $J$  = 7.1 Hz, 3H, CH<sub>3</sub>), 0.83 ppm (t,  $J$  = 7.5 Hz, 3H, CH<sub>3</sub>). **<sup>13</sup>C NMR** (125.8 MHz, CDCl<sub>3</sub>, 298 K)  $\delta$ : 197.9, 174.5, 135.9, 132.7, 128.6, 128.5, 61.3, 57.4, 29.4, 20.6, 13.9, 8.4 ppm. **IR**  $\nu_{\max}$  (cm<sup>-1</sup>): 2978, 2939, 2881, 1732 (C=O), 1681 (C=O), 1598, 1581, 1508, 1446, 1386, 1375, 1301, 1244, 1220, 1172, 1149, 1126, 1095, 1053, 1033, 1024, 1010. **HRMS** (GC–MS) [M+H]<sup>+</sup> [C<sub>14</sub>H<sub>19</sub>O<sub>3</sub>]<sup>+</sup>: calculated 235.13287, found 235.1330.

#### Synthesis of ethyl 2-methyl-3-oxo-2-(pentafluorophenyl)pent-4-ynoate (**3c**)

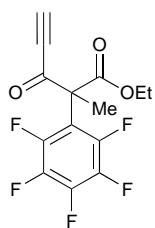

Synthesised in accordance with the *General Procedure* using B(C<sub>6</sub>F<sub>5</sub>)<sub>3</sub> (80 mg, 0.16 mmol), ethyl  $\alpha$ -diazomethylacetate (**1b**, 20 mg, 0.16 mmol), and methyl propiolate (13 mg, 0.16 mmol) in CH<sub>2</sub>Cl<sub>2</sub> to afford **3c**. The crude reaction mixture was purified by filtering over a short plug of silica gel with CHCl<sub>3</sub> as eluent. Afterwards the crude compound was washed with pentane (1  $\times$  1 mL). The desired compound **3c** was obtained as a colourless solid. Yield: 18 mg, 0.09 mmol, 36%. *Note: Compound 3c decomposes on silica gel and in CDCl<sub>3</sub> solution.*

**<sup>1</sup>H NMR** (400.1 MHz, CDCl<sub>3</sub>, 298 K)  $\delta$ : 4.24–4.36 (m, 2H, Et-CH<sub>2</sub>), 3.34 (s, 1H, CH), 1.91 (t,  $J$  = 1.3 Hz, 3H, CH<sub>3</sub>), 1.29 (t,  $J$  = 7.2 Hz, 3H, CH<sub>3</sub>) ppm. **<sup>13</sup>C NMR** (125.8 MHz, CDCl<sub>3</sub>, 298 K)  $\delta$ : 179.8, 167.9, 145.4 (br. d,  $J_{C-F}$  = 251.3 Hz), 141.1 (br. d,  $J_{C-F}$  = 253.9 Hz), 138.0 (br. d,  $J_{C-F}$  = 255.8 Hz), 113.4 (br. s), 82.3, 78.8, 63.3, 60.9, 20.9, 13.8 ppm. **<sup>19</sup>F NMR** (376.5 MHz, CDCl<sub>3</sub>, 298 K)  $\delta$ : -135.83 (d,  $J$  = 20.0 Hz, 2F, Ar-F), -153.35 (t,  $J$  = 20.8 Hz, 1F, Ar-F), -

161.27–161.15 (m, 2F, Ar-F) ppm. **IR**  $\nu_{\max}$  (cm<sup>-1</sup>): 3005, 2989, 2100 (C≡C), 1745 (C=O), 1523, 1492, 1450, 1274, 1261, 1143. **HRMS** (GC-MS) [M+H]<sup>+</sup> [C<sub>14</sub>H<sub>10</sub>O<sub>3</sub>F<sub>5</sub>]<sup>+</sup>: calculated 321.05446, found 321.0544.

*Synthesis of ethyl 2-methyl-3-oxo-2-(pentafluorophenyl)-3-((4-(trifluoromethyl)phenyl)amino) propanoate (3d)*

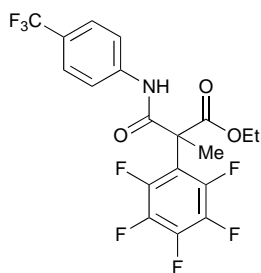

Synthesised in accordance with the *General Procedure* using B(C<sub>6</sub>F<sub>5</sub>)<sub>3</sub> (80 mg, 0.16 mmol), ethyl  $\alpha$ -diazomethylacetate (**1b**, 20 mg, 0.16 mmol), and 4-trifluoromethylphenyl isocyanate (29 mg, 0.16 mmol) in CH<sub>2</sub>Cl<sub>2</sub> to afford **3d**. The crude reaction mixture was purified *via* preparative thin layer chromatography using hexane/ethyl acetate (90:10 v/v) as eluent. The desired compound **3d** was obtained as a colourless solid. Yield: 12 mg, 0.03 mmol, 17%.

**<sup>1</sup>H NMR** (500.2 MHz, CDCl<sub>3</sub>, 298 K)  $\delta$ : 9.73 (s, 1H, NH), 7.66 (d,  $J$  = 8.6 Hz, 2H, Ar-H), 7.60 (d,  $J$  = 8.6 Hz, 2H, Ar-H), 4.26–4.39 (m, 2H, CH<sub>2</sub>), 2.04 (t,  $J$  = 1.9 Hz, 3H, CH<sub>3</sub>), 1.29 (t,  $J$  = 7.2 Hz, 3H, CH<sub>3</sub>) ppm. **<sup>13</sup>C NMR** (125.8 MHz, CDCl<sub>3</sub>, 298 K)  $\delta$ : 173.2, 166.7, 145.9 (br. d,  $J_{\text{C-F}}$  = 252.3 Hz), 141.0 (br. d,  $J_{\text{C-F}}$  = 255.3 Hz), 140.5, 137.9 (br. d,  $J_{\text{C-F}}$  = 253.7 Hz), 126.8 (q,  $J_{\text{C-F}}$  = 32.2 Hz), 126.5 (q,  $J_{\text{C-F}}$  = 3.8 Hz), 124.2 (q,  $J_{\text{C-F}}$  = 270.6 Hz), 199.9, 114.8 (br. s), 63.8, 55.5, 23.5 (t,  $J_{\text{C-F}}$  = 4.4 Hz), 13.9 ppm. **<sup>19</sup>F NMR** (376.5 MHz, CDCl<sub>3</sub>, 298 K)  $\delta$ : -62.20 (s, 3F, CF<sub>3</sub>), -139.35–139.27 (m, 2F, Ar-F), -153.78 (t,  $J$  = 21.6 Hz, 1F, Ar-F), -161.43–161.28 (m, 2F, Ar-F) ppm. **IR**  $\nu_{\max}$  (cm<sup>-1</sup>): 3323 (NH), 3047, 2988, 2943, 2880, 1738 (C=O), 1676 (C=O), 1603, 1524, 1491, 1452, 1408, 1317, 1248, 1184, 1169, 1155, 1119, 1105, 1067, 1016. **HRMS** (ES+) [M+H]<sup>+</sup> [C<sub>19</sub>H<sub>14</sub>O<sub>3</sub>F<sub>8</sub>]<sup>+</sup>: calculated 456.0846, found 456.0846.

*Synthesis of ethyl 3-((4-methoxyphenyl)amino)-2-methyl-3-oxo-2-(pentafluorophenyl) propanoate (3e)*

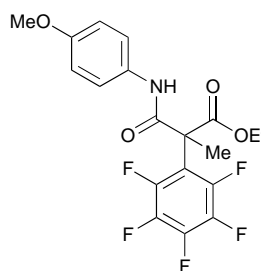

Synthesised in accordance with the *General Procedure* using B(C<sub>6</sub>F<sub>5</sub>)<sub>3</sub> (80 mg, 0.16 mmol), ethyl  $\alpha$ -diazomethylacetate (**1b**, 20 mg, 0.16 mmol), and 4-methoxyphenyl isocyanate (23 mg, 0.16 mmol) in CH<sub>2</sub>Cl<sub>2</sub> to afford **3e**. The crude reaction mixture was purified *via* preparative thin layer chromatography using hexane/ethyl acetate (90:10 v/v) as eluent. The desired compound **3e** was obtained as a colourless solid. Yield: 35 mg, 0.08 mmol, 54%.

**<sup>1</sup>H NMR** (500.2 MHz, CDCl<sub>3</sub>, 298 K) δ: 9.27 (s, 1H, NH), 7.41–7.44 (m, 2H, Ar-H), 6.85–6.88 (m, 2H, Ar-H), 4.24–4.38 (m, 2H, CH<sub>2</sub>), 3.79 (s, 3H, OCH<sub>3</sub>), 2.01 (t, *J* = 2.0 Hz, 3H, CH<sub>3</sub>), 1.29 (t, *J* = 7.2 Hz, 3H, CH<sub>3</sub>) ppm. **<sup>13</sup>C NMR** (125.8 MHz, CDCl<sub>3</sub>, 298 K) δ: 173.0, 166.0, 156.9, 146.0 (br. d, *J*<sub>C-F</sub> = 249.6 Hz), 140.8 (br. d, *J*<sub>C-F</sub> = 256.7 Hz), 137.9 (br. d, *J*<sub>C-F</sub> = 252.3 Hz), 130.6, 122.0, 115.3 (br. s), 114.3, 63.4, 55.6, 55.3, 23.4 (t, *J*<sub>C-F</sub> = 4.2 Hz), 13.9 ppm. **<sup>19</sup>F NMR** (470.2 MHz, CDCl<sub>3</sub>, 298 K) δ: -139.14 (d, *J* = 16.5 Hz, 2F, Ar-F), -154.49 (t, *J* = 16.5 Hz, 1F, Ar-F), -161.83–161.73 (m, 2F, Ar-F) ppm. **IR** *v*<sub>max</sub> (cm<sup>-1</sup>): 3335 (NH), 3310 (NH), 3057, 2988, 2940, 2911, 2839 (OCH<sub>3</sub>), 1719 (C=O), 1684 (C=O), 1655, 1599, 1522, 1512, 1493, 1414, 1383, 1300, 1246, 1167, 1126, 1111, 1080, 1061, 1034, 1015. **HRMS** (ES+) [M+H]<sup>+</sup> [C<sub>19</sub>H<sub>17</sub>NO<sub>4</sub>F<sub>5</sub>]<sup>+</sup>: calculated 418.1078, found 418.1077.

*Synthesis of ethyl 2-((4-methoxyphenyl)carbamoyl)-2-methylbutanoate (3h)*

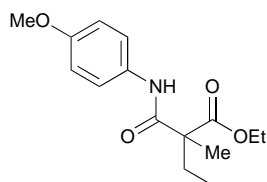

Synthesised in accordance with the *General Procedure* using BEt<sub>3</sub> (0.16 mL, 0.16 mmol, 1M in hexane), ethyl α-diazomethylacetate (**1b**, 20 mg, 0.16 mmol), and 4-methoxyphenyl isocyanate (23 mg, 0.16 mmol) in CH<sub>2</sub>Cl<sub>2</sub> to afford **3h**. The crude reaction mixture was purified *via* preparative thin layer chromatography using hexane/ethyl acetate (90:10 v/v) as eluent. The desired compound **3h** was obtained as a colourless oil. Yield: 6 mg, 0.2 mmol, 14%.

**<sup>1</sup>H NMR** (500.2 MHz, CDCl<sub>3</sub>, 298 K) δ: 9.09 (s, 1H, NH), 7.44–7.47 (m, 2H, Ar-H), 6.84–6.87 (m, 2H, Ar-H), 4.20–4.30 (m, 2H, CH<sub>2</sub>), 3.79 (s, 3H, OCH<sub>3</sub>), 2.06–2.13 (m, 1H, CH<sub>2</sub>), 1.89–1.96 (m, 1H, CH<sub>2</sub>), 1.50 (s, 3H, CH<sub>3</sub>), 1.32 (t, *J* = 7.1 Hz, 3H, CH<sub>3</sub>), 0.91 ppm (t, *J* = 7.8 Hz, 3H, CH<sub>3</sub>). **<sup>13</sup>C NMR** (125.8 MHz, CDCl<sub>3</sub>, 298 K) δ: 175.9, 169.3, 156.5, 131.2, 121.9, 114.2, 61.9, 55.7, 54.7, 32.2, 20.8, 14.2, 9.7 ppm. **IR** *v*<sub>max</sub> (cm<sup>-1</sup>): 3330 (NH), 2976, 2937, 2881, 2837, 1734 (C=O), 1712, 1681, 1598, 1512, 1462, 1444, 1411, 1377, 1300, 1246, 1174, 1151, 1128, 1112, 1055, 1033. **HRMS** (ASAP) [M+H]<sup>+</sup> [C<sub>15</sub>H<sub>22</sub>O<sub>4</sub>N]<sup>+</sup>: calculated 280.1549, found 280.1557.

### Synthesis of ethyl 2-methyl-3-oxo-2-(pentafluorophenyl)-3-(phenylamino)propanoate (**3f**)

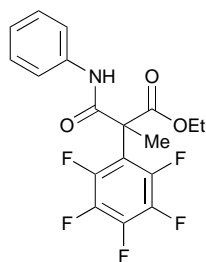

Synthesised in accordance with the *General Procedure* using  $B(C_6F_5)_3$  (80 mg, 0.16 mmol), ethyl  $\alpha$ -diazomethylacetate (**1b**, 20 mg, 0.16 mmol), and phenyl isocyanate (19 mg, 0.16 mmol) in  $CH_2Cl_2$  to afford **3f**. The crude reaction mixture was purified *via* preparative thin layer chromatography using hexane/ethyl acetate (90:10 v/v) as eluent. The desired compound **3f** was obtained as a colourless solid. Yield: 17 mg, 0.04 mmol, 28%.

**$^1H$  NMR** (500.2 MHz,  $CDCl_3$ , 298 K)  $\delta$ : 9.41 (s, 1H, NH), 7.51–7.54 (m, 2H, Ar-H), 7.32–7.36 (m, 2H, Ar-H), 7.12–7.16 (m, 1H, Ar-H), 4.25–4.38 (m, 2H,  $CH_2$ ), 2.02 (t,  $J = 2.0$  Hz, 3H,  $CH_3$ ), 1.29 (t,  $J = 7.2$  Hz, 3H,  $CH_3$ ) ppm.  **$^{13}C$  NMR** (125.8 MHz,  $CDCl_3$ , 298 K)  $\delta$ : 173.0, 166.1, 145.9 (br. d,  $J_{C-F} = 247.4$  Hz), 140.9 (br. d,  $J_{C-F} = 254.2$  Hz), 137.9 (br. d,  $J_{C-F} = 256.1$  Hz), 137.5, 129.2, 125.0, 120.3, 115.2 (br. s), 63.5, 55.5, 23.4 (t,  $J_{C-F} = 3.9$  Hz), 14.0 ppm.  **$^{19}F$  NMR** (470.2 MHz,  $CDCl_3$ , 298 K)  $\delta$ : -139.09 (d,  $J = 16.9$  Hz, 2F, Ar-F), -154.32 (t,  $J = 20.5$  Hz, 1F, Ar-F), -161.66 (dt,  $J = 20.5, 16.9$  Hz, 2F, Ar-F) ppm. **IR**  $\nu_{max}$  ( $cm^{-1}$ ): 3335 (NH), 3310 (NH), 3063, 2986, 2941, 2853, 1721 (C=O), 1684 (C=O), 1655, 1599, 1524, 1491, 1443, 1383, 1308, 1246, 1165, 1125, 1098, 1078, 1061, 1015. **HRMS** (ES+)  $[M+H]^+$   $[C_{18}H_{15}NO_3F_5]^+$ : calculated 388.0972, found 388.0970.

## 2.4 Synthesis and spectral characterisation of $\alpha$ -aryl ketones

### Synthesis of 1-(4-fluorophenyl)-2-(pentafluorophenyl)propan-1-one (**7a**)

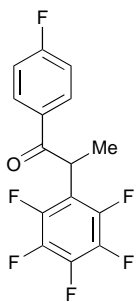

Synthesised in accordance with the *General Procedure* using  $B(C_6F_5)_3$  (80 mg, 0.16 mmol), ethyl  $\alpha$ -diazomethylacetate (**1b**, 20 mg, 0.16 mmol), and 4-fluorobenzoyl chloride (25 mg, 0.16 mmol) in  $CH_2Cl_2$  to afford **7a**. The crude reaction mixture was purified *via* preparative thin layer chromatography using hexane/ethyl acetate (90:10 v/v) as eluent. The desired compound **7a** was obtained as a colourless oil. Yield: 16 mg, 0.05 mmol, 32%. *Note: 7a is contaminated with a small amount of the  $\beta$ -keto ester.*

**$^1H$  NMR** (400.1 MHz,  $CDCl_3$ , 298 K)  $\delta$ : 7.84–7.87 (m, 2H, Ar-H), 7.08–7.11 (m, 2H, Ar-H), 4.80 (q,  $J = 7.4$  Hz, 1H, CH), 1.60 (d,  $J = 7.4$  Hz, 3H,  $CH_3$ ) ppm.  **$^{13}C$  NMR** (125.8 MHz,  $CDCl_3$ , 298 K)  $\delta$ : 195.3, 165.9 (d,  $J_{C-F} = 255.5$  Hz), 144.8 (br. d,  $J_{C-F} = 247.9$  Hz), 140.6 (br. d,  $J_{C-F} = 259.3$  Hz), 137.9 (br. d,  $J_{C-F} = 252.9$  Hz), 132.0 (d,  $J_{C-F} = 2.9$  Hz), 131.0 (d,  $J_{C-F} = 9.4$  Hz), 116.2 (d,  $J_{C-F} = 22.7$  Hz), 115.2 (br. s), 38.2, 16.1 ppm.  **$^{19}F$  NMR** (376.5 MHz,  $CDCl_3$ , 298 K)  $\delta$ : -104.42–104.36 (m, 1F, Ar-F), -142.14 (dd,  $J = 21.2, 6.7$  Hz, 2F, Ar-F), -154.89 (t,

$J = 20.9$  Hz, 1F, Ar-F),  $-161.08$  (dd,  $J = 20.9, 21.2$  Hz, 2F, Ar-F) ppm. **IR**  $\nu_{\max}$  ( $\text{cm}^{-1}$ ): 3076, 2988, 2941, 2884, 1746, 1694 (C=O), 1655, 1599, 1522, 1499, 1456, 1408, 1381, 1306, 1296, 1225, 1157, 1148, 1128, 1070, 1030. **HRMS** (ES+)  $[M+H]^+$   $[\text{C}_{15}\text{H}_9\text{OF}_6]^+$ : calculated 319.0558, found 319.0565.

#### Synthesis of 1-(4-methoxyphenyl)-2-(pentafluorophenyl)propan-1-one (**7b**)

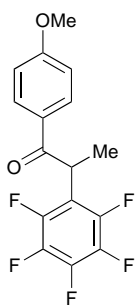

Synthesised in accordance with the *General Procedure* using  $\text{B}(\text{C}_6\text{F}_5)_3$  (80 mg, 0.16 mmol), ethyl  $\alpha$ -diazomethylacetate (**1b**, 20 mg, 0.16 mmol), and 4-methoxybenzoyl chloride (27 mg, 0.16 mmol) in  $\text{CH}_2\text{Cl}_2$  to afford **7b**. The crude reaction mixture was purified *via* preparative thin layer chromatography using hexane/ethyl acetate (90:10 v/v) as eluent. The desired compound **7b** was obtained as a colourless oil. Yield: 22 mg, 0.07 mmol, 43%.

**$^1\text{H}$  NMR** (400.1 MHz,  $\text{CDCl}_3$ , 298 K)  $\delta$ : 7.82 (d,  $J = 8.7$  Hz, 2H, Ar-H), 6.89 (d,  $J = 8.7$  Hz, 2H, Ar-H), 4.81 (q,  $J = 7.9$  Hz, 1H, CH), 3.84 (s, 3H,  $\text{OCH}_3$ ), 1.59 (d,  $J = 7.9$  Hz, 3H,  $\text{CH}_3$ ) ppm.  **$^{13}\text{C}$  NMR** (125.8 MHz,  $\text{CDCl}_3$ , 298 K)  $\delta$ : 195.2, 163.7, 144.9 (br. d,  $J_{\text{C-F}} = 247.9$  Hz), 140.4 (br. d,  $J_{\text{C-F}} = 253.7$  Hz), 137.8 (br. d,  $J_{\text{C-F}} = 253.7$  Hz), 130.6, 128.4, 115.7 (br. s), 114.1, 55.6, 37.9, 16.2 ppm.  **$^{19}\text{F}$  NMR** (376.5 MHz,  $\text{CDCl}_3$ , 298 K)  $\delta$ :  $-142.10$  (dd,  $J = 21.1, 6.7$  Hz, 2F, Ar-F),  $-155.56$  (t,  $J = 21.2$  Hz, 1F, Ar-F),  $-161.46$  (ddd,  $J = 21.2, 21.1, 6.7$  Hz, 2F, Ar-F) ppm. **IR**  $\nu_{\max}$  ( $\text{cm}^{-1}$ ): 3057, 2986, 2940, 2843 ( $\text{OCH}_3$ ), 1686 (C=O), 1655, 1599, 1574, 1520, 1499, 1458, 1420, 1379, 1312, 1258, 1219, 1171, 1148, 1128, 1069, 1030. **HRMS** (ES+)  $[M+H]^+$   $[\text{C}_{16}\text{H}_{12}\text{O}_2\text{F}_5]^+$ : calculated 331.0757, found 331.0764.

#### Synthesis of 2-(pentafluorophenyl)-1-(*o*-tolyl)propan-1-one (**7c**)

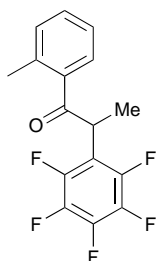

Synthesised in accordance with *General Procedure* using  $\text{B}(\text{C}_6\text{F}_5)_3$  (80 mg, 0.16 mmol), ethyl  $\alpha$ -diazomethylacetate (**1b**, 20 mg, 0.16 mmol), and 2-methylbenzoyl chloride (24 mg, 0.16 mmol) in  $\text{CH}_2\text{Cl}_2$  to afford **7c**. The crude reaction mixture was purified *via* preparative thin layer chromatography using hexane/ethyl acetate (90:10 v/v) as eluent. The desired compound **7c** was obtained as a colourless solid. Yield: 9 mg, 0.03 mmol, 18%.

**$^1\text{H}$  NMR** (400.1 MHz,  $\text{CDCl}_3$ , 298 K)  $\delta$ : 7.44 (dd,  $J = 7.8, 1.2$  Hz, 1H, Ar-H), 7.32 (dt,  $J = 7.8, 1.3$  Hz, 1H, Ar-H), 7.22–7.25 (m, 1H, Ar-H), 7.15–7.19 (m, 1H, Ar-H), 4.76 (q,  $J = 7.2$  Hz, 1H, CH), 2.46 (s, 3H, *o*- $\text{CH}_3$ ), 1.56 (d,  $J = 7.2$  Hz, 3H,  $\text{CH}_3$ ) ppm.  **$^{13}\text{C}$  NMR** (125.8 MHz,

CDCl<sub>3</sub>, 298 K)  $\delta$ : 200.5, 144.9 (br. d,  $J_{C-F}$  = 246.1 Hz), 140.9 9 (br. d,  $J_{C-F}$  = 254.3 Hz), 138.8, 137.7 9 (br. d,  $J_{C-F}$  = 250.4 Hz), 136.4, 132.3, 131.5, 127.3, 125.7, 115.2, 40.3, 25.5, 20.6, 15.6 ppm. **<sup>19</sup>F NMR** (376.5 MHz, CDCl<sub>3</sub>, 298 K)  $\delta$ : -142.45 (dd,  $J$  = 22.1, 7.2 Hz, 2F, Ar-F), -155.37 (t,  $J$  = 22.1 Hz, 1F, Ar-F), -161.53 (ddd,  $J$  = 22.1, 22.1 7.2 Hz, 2F, Ar-F) ppm. **IR**  $\nu_{\max}$  (cm<sup>-1</sup>): 3067, 3019, 2994, 2959, 2926, 2853, 1701 (C=O), 1655, 1599, 1520, 1501, 1456, 1383, 1354, 1298, 1273, 1217, 1198, 1153, 1125, 1082, 1059, 1016. **HRMS** (AP+) [M+H]<sup>+</sup> [C<sub>16</sub>H<sub>12</sub>OF<sub>5</sub>]<sup>+</sup>: calculated 315.0808, found 315.0808.

*Synthesis of 2-(pentafluorophenyl)-1-phenylpropan-1-one (7d)*

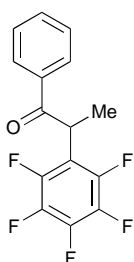

Synthesised in accordance with the *General Procedure* using B(C<sub>6</sub>F<sub>5</sub>)<sub>3</sub> (80 mg, 0.16 mmol), ethyl  $\alpha$ -diazomethylacetate (**1b**, 20 mg, 0.16 mmol), and benzoyl chloride (22 mg, 0.16 mmol) in CH<sub>2</sub>Cl<sub>2</sub> to afford **7d**. The crude reaction mixture was purified *via* preparative thin layer chromatography using hexane/ethyl acetate (95:5 v/v) as eluent. The desired compound **7d** was obtained as a colourless solid.

Yield: 20 mg, 0.07 mmol, 43%.

**<sup>1</sup>H NMR** (400.1 MHz, CDCl<sub>3</sub>, 298 K)  $\delta$ : 7.81–7.83 (m, 2H, Ar-H), 7.51–7.55 (m, 1H, Ar-H), 7.40–7.44 (m, 2H, Ar-H), 4.85 (q,  $J$  = 7.2 Hz, 1H, CH), 1.61 (d,  $J$  = 7.2 Hz, 3H, CH<sub>3</sub>) ppm. **<sup>13</sup>C NMR** (125.8 MHz, CDCl<sub>3</sub>, 298 K)  $\delta$ : 196.9, 144.9 (br. d,  $J_{C-F}$  = 246.9 Hz), 140.5 (br. d,  $J_{C-F}$  = 252.6 Hz), 137.8 (br. d,  $J_{C-F}$  = 250.2 Hz), 135.7, 133.4, 128.9, 128.3, 155.4 (br. s), 38.3, 16.1 ppm. **<sup>19</sup>F NMR** (376.5 MHz, CDCl<sub>3</sub>, 298 K)  $\delta$ : -142.13 (dd,  $J$  = 22.1, 7.2 Hz, 2F, Ar-F), -155.26 (t,  $J$  = 22.1 Hz, 1F, Ar-F), -161.36 (ddd,  $J$  = 22.1, 22.1 7.2 Hz, 2F, Ar-F) ppm. **IR**  $\nu_{\max}$  (cm<sup>-1</sup>): 3055, 2941, 2916, 2855, 1697(C=O), 1657, 1597, 1522, 1499, 1454, 1447, 1379, 1225, 1128, 1069, 1026. **HRMS** (ES+) [M+H]<sup>+</sup> [C<sub>15</sub>H<sub>10</sub>OF<sub>5</sub>]<sup>+</sup>: calculated 301.0652, found 301.0657.

### 3. Optimisation of reaction conditions and determination of diastereomeric ratio

#### 3.1 Variation of solvent, temperature, and time

Following the *General Procedure* using  $B(C_6F_5)_3$  (80 mg, 0.16 mmol), ethyl  $\alpha$ -diazomethylacetate (**1b**, 20 mg, 0.16 mmol), and 4-fluorobenzaldehyde (19 mg, 0.16 mmol) in  $CH_2Cl_2$  to afford **2b**. A  $^{19}F$  NMR spectrum was recorded of the crude reaction mixture to determine the diastereomeric ratio (see below) before it was purified *via* preparative thin layer chromatography using hexane/ethyl acetate (95:05 v/v) as eluent. Yields reported are isolated yields.

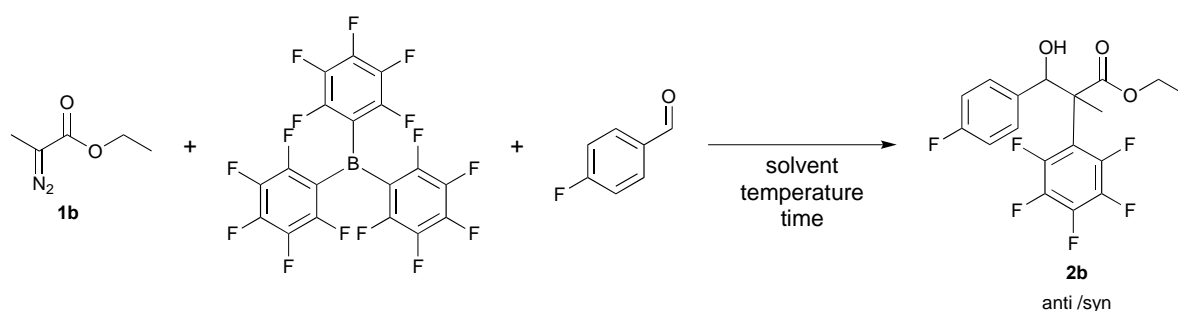

| Entry | Solvent      | Temperature | Time | Yield anti | Yield syn | <i>dr</i> | Yield combined |
|-------|--------------|-------------|------|------------|-----------|-----------|----------------|
| 1     | $CH_2Cl_2$   | 45 °C       | 20 h | 53%        | 9%        | 1:0.10    | 62%            |
| 2     | Toluene      | 45 °C       | 20 h | 35%        | 6%        | 1:0.14    | 41%            |
| 3     | Hexane       | 45 °C       | 20 h | 37%        | 3%        | 1:0.12    | 40%            |
| 4     | $CH_2Cl_2$   | 20 °C       | 20 h | 35%        | 8%        | 1:0.10    | 43%            |
| 5     | $C_2H_4Cl_2$ | 60 °C       | 20 h | 23%        | 8%        | 1:0.26    | 31%            |
| 6     | $CH_2Cl_2$   | 45 °C       | 24 h | 60%        | 12%       | 1:0.10    | 72%            |
| 7     | $CH_2Cl_2$   | 45 °C       | 30 h | 60%        | 10%       | 1:0.10    | 70%            |

Upon longer reaction times, the consumption of the 4-fluorobenzaldehyde starting material increases (see Figure S1). However, the isolated yields of entry 6 and 7 are almost identical.



Figure S1: Comparison of the  $^{19}\text{F}$  NMR (376.5 MHz,  $\text{CDCl}_3$ , 298 K) spectra of the crude reaction mixture from the reactions of entry 1, 6, and 7.

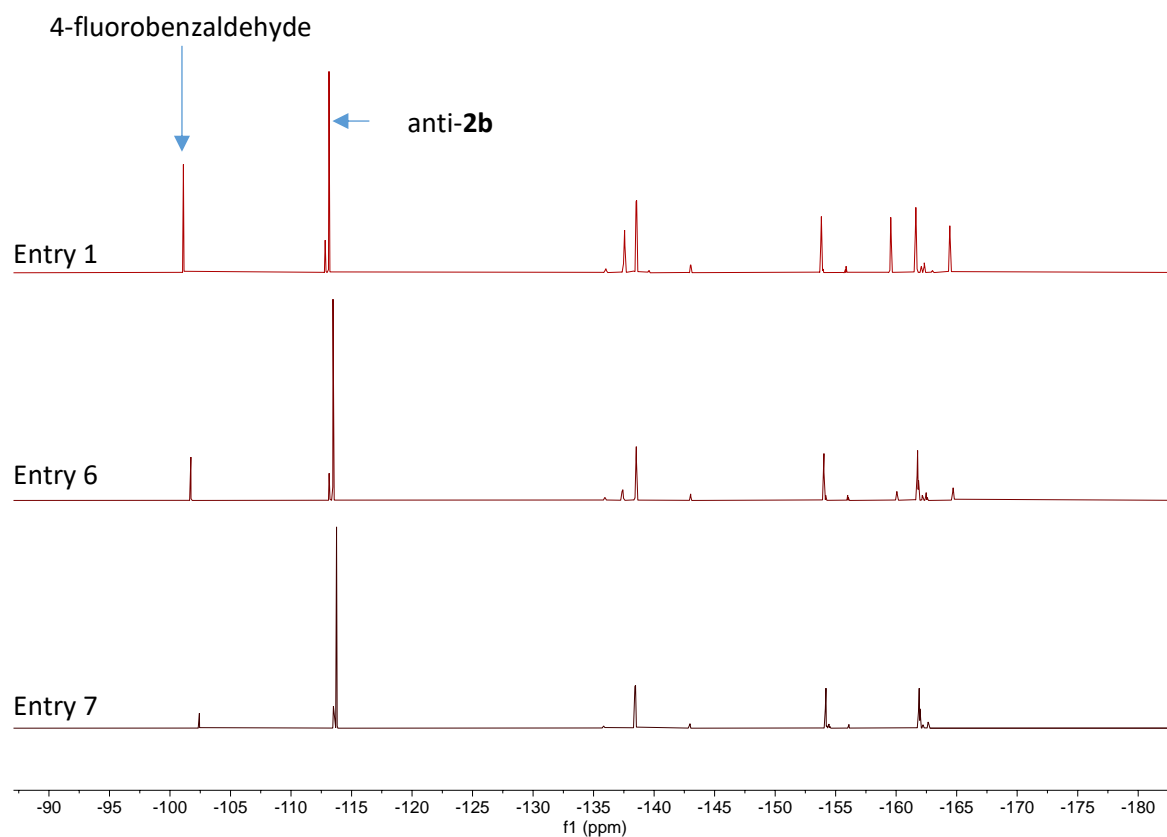

### 3.2 Variation of amount of B(C<sub>6</sub>F<sub>5</sub>)<sub>3</sub>

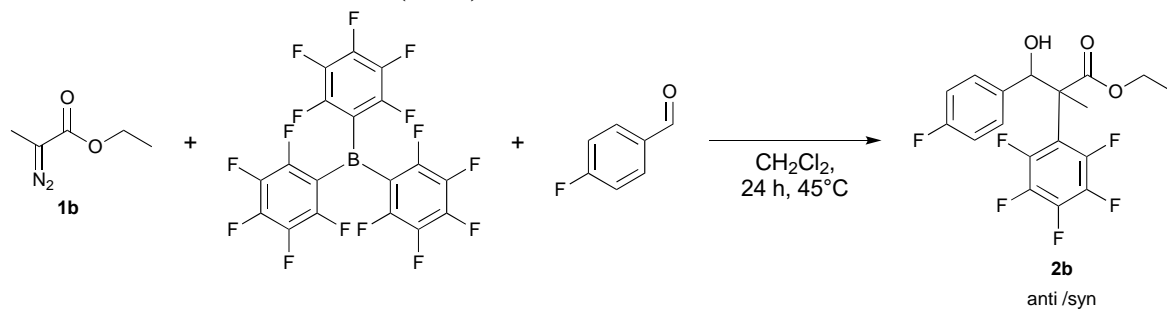

| Entry | Eq. BCF | Yield anti | Yield syn | <i>dr</i> | Yield combiend |
|-------|---------|------------|-----------|-----------|----------------|
| 8     | 0.8     | 45%        | 11%       | 1:0.15    | 56%            |
| 9     | 0.6     | 37%        | 8%        | 1:0.15    | 45%            |
| 10    | 1.2     | 46%        | 6%        | 1:0.15    | 52%            |

Following the *General Procedure* using B(C<sub>6</sub>F<sub>5</sub>)<sub>3</sub>, ethyl  $\alpha$ -diazomethylacetate (**1b**, 20 mg, 0.16 mmol), and 4-fluorobenzaldehyde (19 mg, 0.16 mmol) in CH<sub>2</sub>Cl<sub>2</sub> to afford **2b**. A <sup>19</sup>F NMR spectrum was recorded of the crude reaction mixture to determine the diastereomeric ratio (see below) before it was purified *via* preparative thin layer chromatography using hexane/ethyl acetate (95:05 v/v) as eluent. Yields reported are isolated yields.

### 3.3 Example of determination of the diastereomeric ratio

For the determination of the diastereomeric ratio of **2b**, the  $^{19}\text{F}$  signals belonging to syn- and anti-**2b** in the  $^{19}\text{F}$  NMR spectrum of the crude reaction mixture from the reaction of **1b**,  $\text{B}(\text{C}_6\text{F}_5)_3$ , and 4-fluorobenzaldehyde (entry 7) were integrated after identification from the crude reaction mixture (see Figure S2 and S3).

Figure S2: Comparison of the  $^{19}\text{F}$  NMR (376.5 MHz,  $\text{CDCl}_3$ , 298 K) spectra of pure syn-**2b**, anti-**2b** and the crude reaction mixture from the reaction of entry 7.

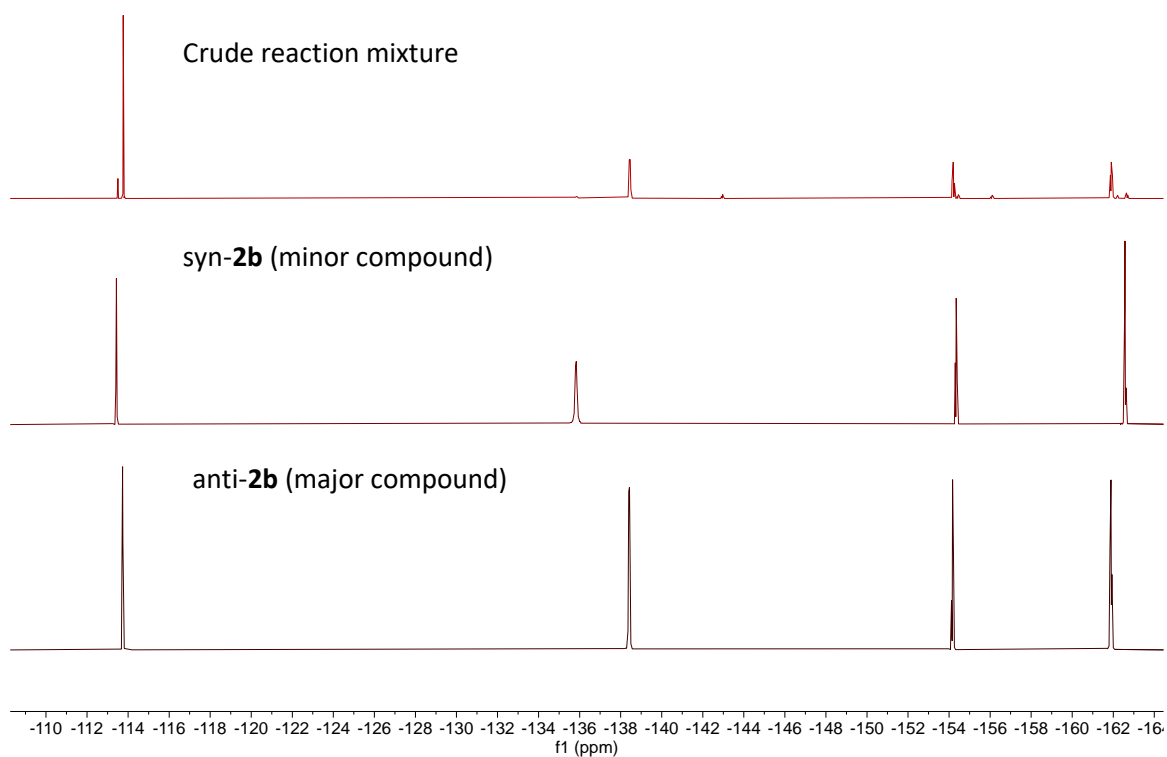

Figure S3:  $^{19}\text{F}$  NMR (376.5 MHz,  $\text{CDCl}_3$ , 298 K) spectrum of the crude reaction mixture from the reaction of entry 7.

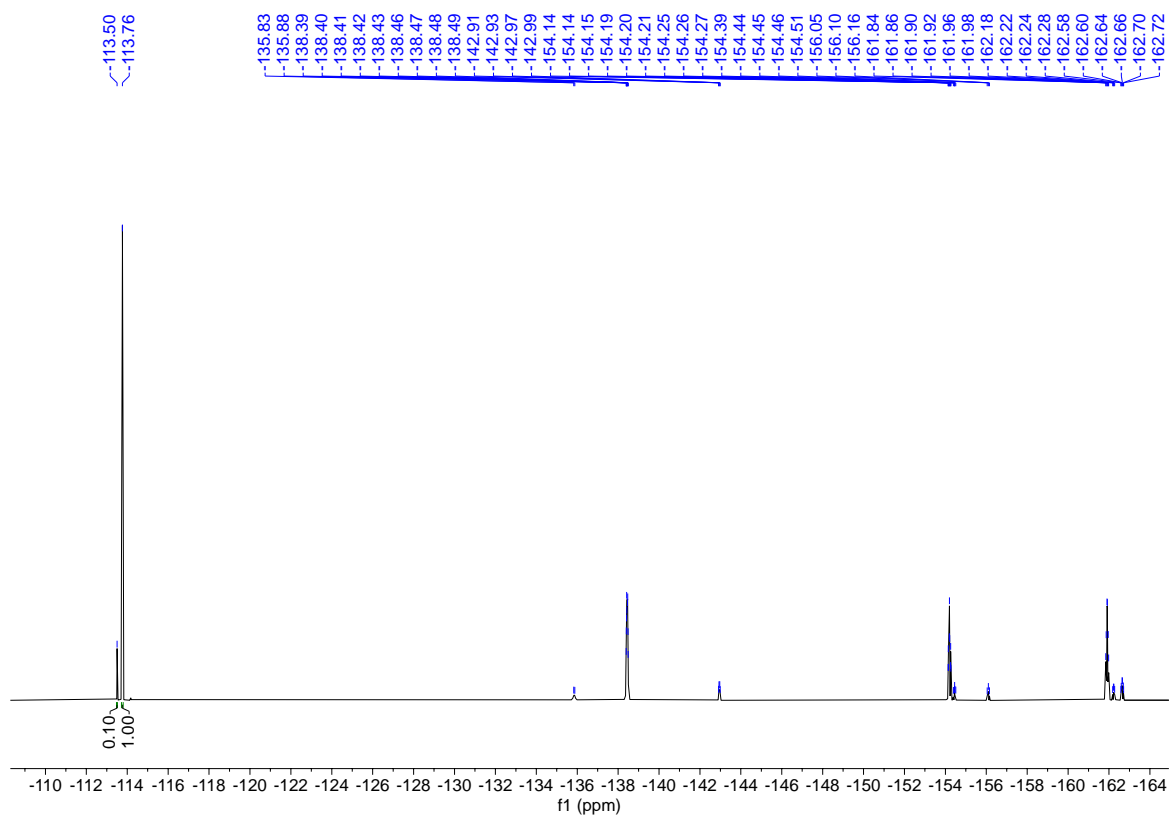

#### 4. Side products of reaction of **1a**, B(C<sub>6</sub>F<sub>5</sub>)<sub>3</sub>, and 4-fluorobenzaldehyde

Following the *General Procedure* using B(C<sub>6</sub>F<sub>5</sub>)<sub>3</sub> (90 mg, 0.18 mmol), ethyl diazoacetate (**1a**, 20 mg, 0.18 mmol, 15% in toluene), and 4-fluorobenzaldehyde (22 mg, 0.18 mmol) in CH<sub>2</sub>Cl<sub>2</sub>, a mixture of compounds **4** and **6** (in addition to **2a**) could be isolated *via* preparative thin layer chromatography using hexane/ethyl acetate (95:5 v/v) as eluent. Total amount of the mixture of **4** and **6**: 8 mg, ratio **4**:**6** = 0.2:1. *Note: In this reaction, 2a was formed in 30 mg (45%, 0.08 mmol).*

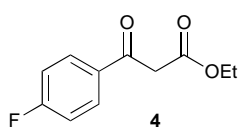

**<sup>1</sup>H NMR** (400.1 MHz, CDCl<sub>3</sub>, 298 K) δ: 7.96–8.01 (m, 2H, Ar-H), 7.16–7.20 (m, 2H, Ar-H), 4.22 (q, *J* = 7.4 Hz, 2H, CH<sub>2</sub>), 3.96 (s, 2H, CH<sub>2</sub>), 1.26 (t, *J* = 7.4 Hz, 3H, CH<sub>3</sub>) ppm. The values are in agreement with the literature.<sup>3</sup>

A clean sample of **6** could be generated by repeated preparative thin layer chromatography using hexane/ethyl acetate (95:5 v/v) as eluent. Single crystals of **6** could be obtained by slow evaporation of a concentrated solution of **6** in CHCl<sub>3</sub>. *Note: The quantities of 6 obtained were too small for measuring the <sup>13</sup>C NMR spectrum.*

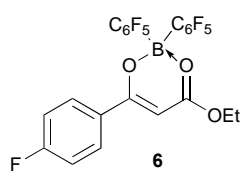

**<sup>1</sup>H NMR** (400.1 MHz, CDCl<sub>3</sub>, 298 K) δ: 7.97–8.01 (m, 2H, Ar-H), 7.16–7.20 (m, 2H, Ar-H), 5.90 (s, 1H, CH), 4.61 (q, *J* = 7.2 Hz, CH<sub>2</sub>), 1.46 (t, *J* = 7.2 Hz, CH<sub>3</sub>) ppm. **<sup>11</sup>B NMR** (157.4 MHz, CDCl<sub>3</sub>, 298 K) δ: 6.2 ppm. **<sup>19</sup>F NMR** (470.2 MHz, CDCl<sub>3</sub>, 298 K) δ: -103.14–103.08 (m, 1F, Ar-F), -136.31 (dd, *J* = 23.8, 8.5 Hz, 4F, Ar-F), -156.12 (t, *J* = 23.8, Hz, 2F, Ar-F), -163.36 (dt, *J* = 23.8, 8.5 Hz, 4F, Ar-F) ppm.

Following the *General Procedure* using catalytic amounts of B(C<sub>6</sub>F<sub>5</sub>)<sub>3</sub> (9 mg, 0.02 mmol), ethyl diazoacetate (**1a**, 20 mg, 0.18 mmol, 15% in toluene), and 4-fluorobenzaldehyde (22 mg, 0.18 mmol) in CH<sub>2</sub>Cl<sub>2</sub>, additional to compounds **4** and **6**, **5** could be identified in the crude reaction mixture.

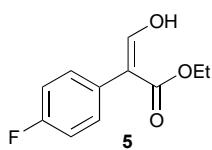

**<sup>1</sup>H NMR** (400.1 MHz, CDCl<sub>3</sub>, 298 K) δ: 12.08 (d, *J* = 12.6 Hz, 1H, OH), 7.18–7.25 (m, 3H, CH and Ar-H), 6.99–7.04 (m, 2H, Ar-H), 4.28 (q, *J* = 7.2 Hz, CH<sub>2</sub>), 1.28 (t, *J* = 7.2 Hz, H<sub>3</sub>) ppm. The values are in agreement with the literature.<sup>4</sup>

## 5. NMR Spectra

Figure S4:  $^1\text{H}$  NMR (400.1 MHz,  $\text{CDCl}_3$ , 298 K) spectrum of **2a**.

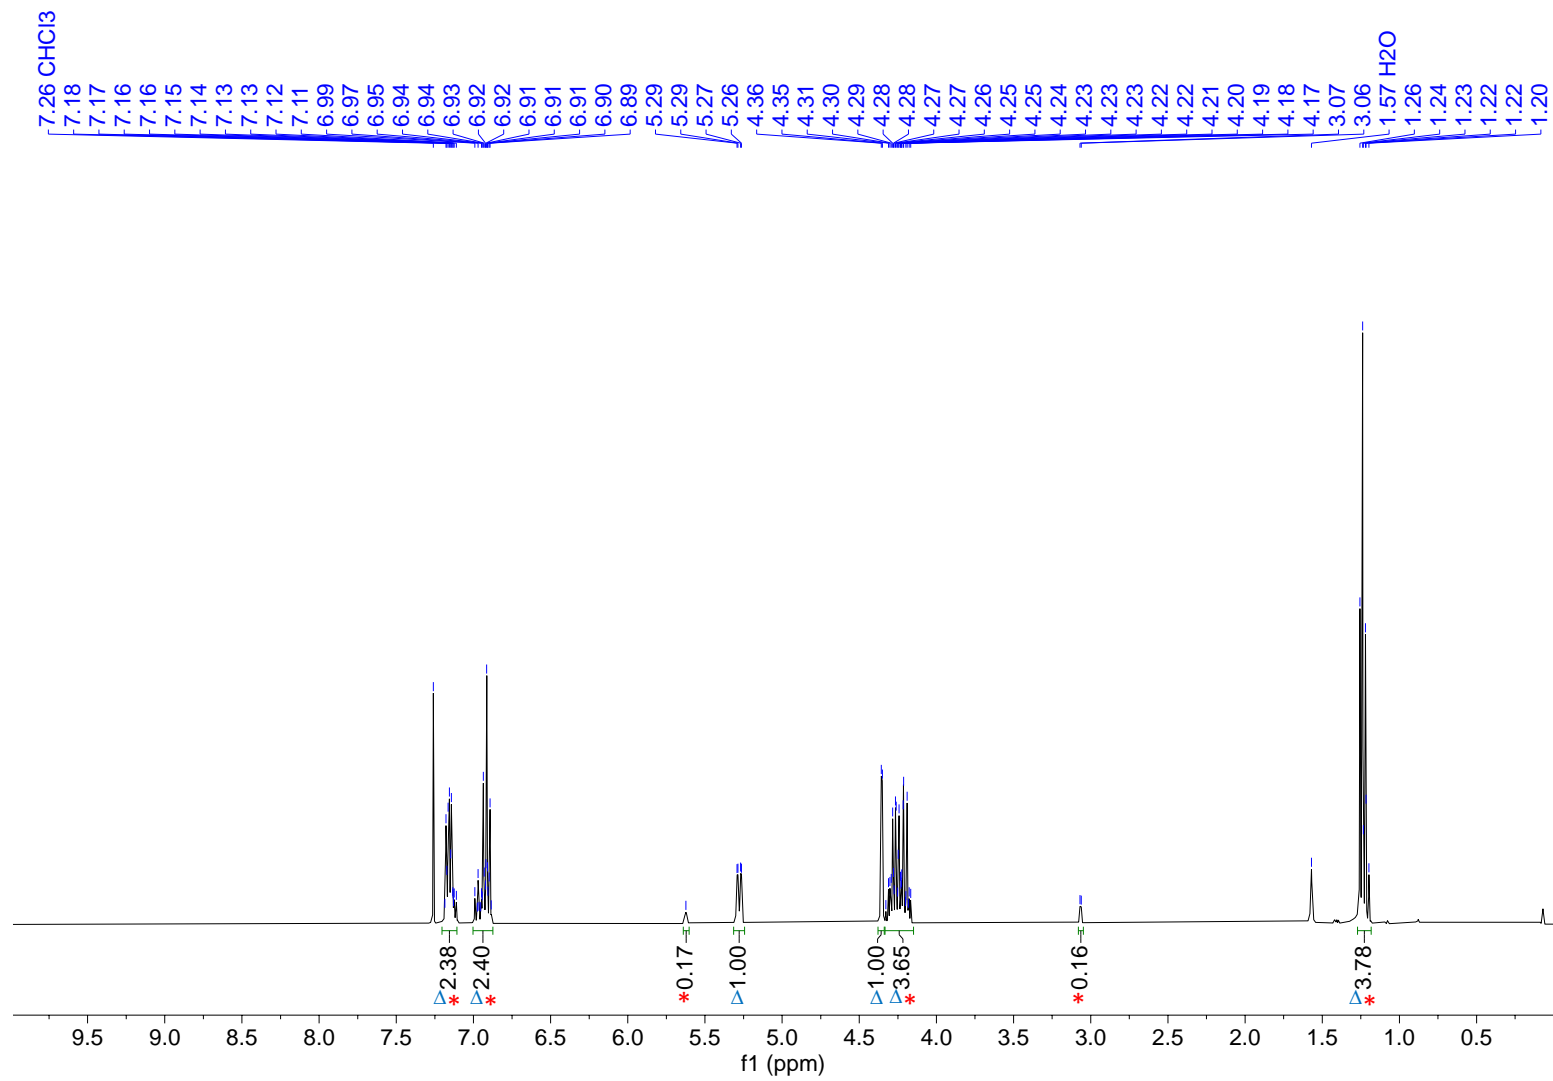

Figure S5:  $^{13}\text{C}$  NMR (125.8 MHz,  $\text{CDCl}_3$ , 298 K) spectrum of **2a**.

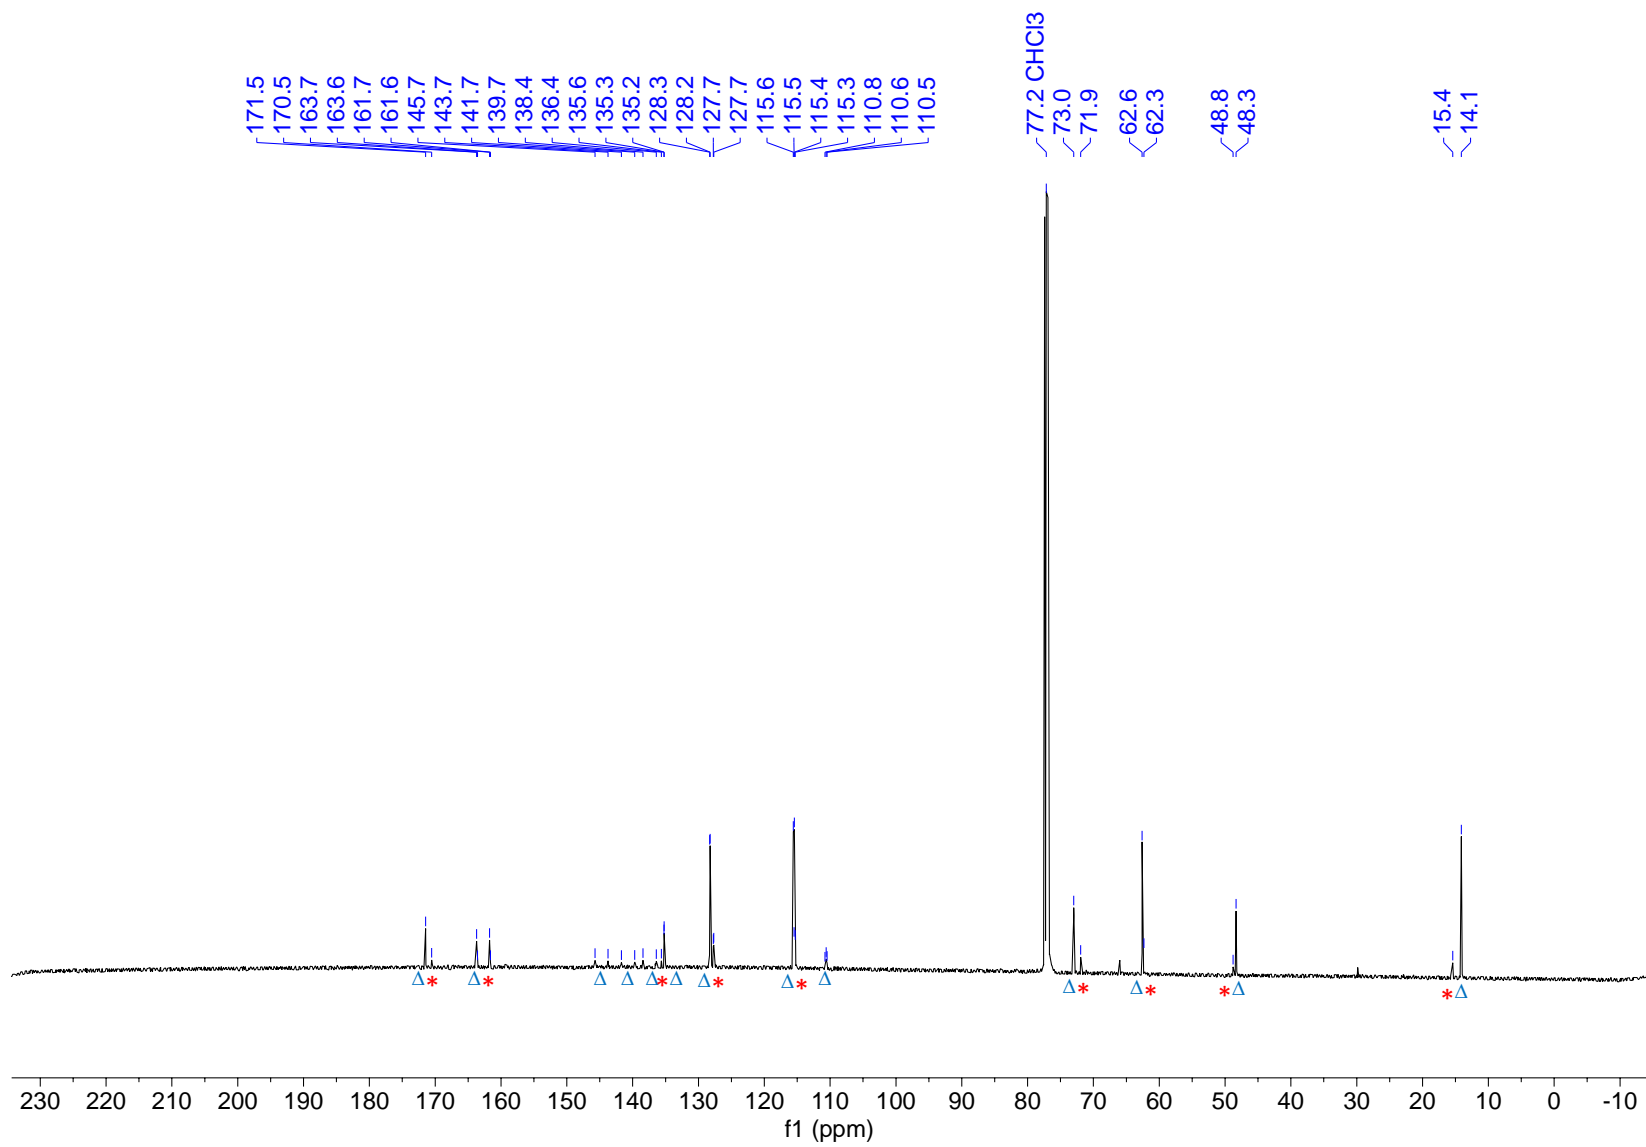

Figure S6:  $^{19}\text{F}$  NMR (376.5 MHz,  $\text{CDCl}_3$ , 298 K) spectrum of the diastereomeric mixture of **2a**. Signals of the minor compound are marked with \*.

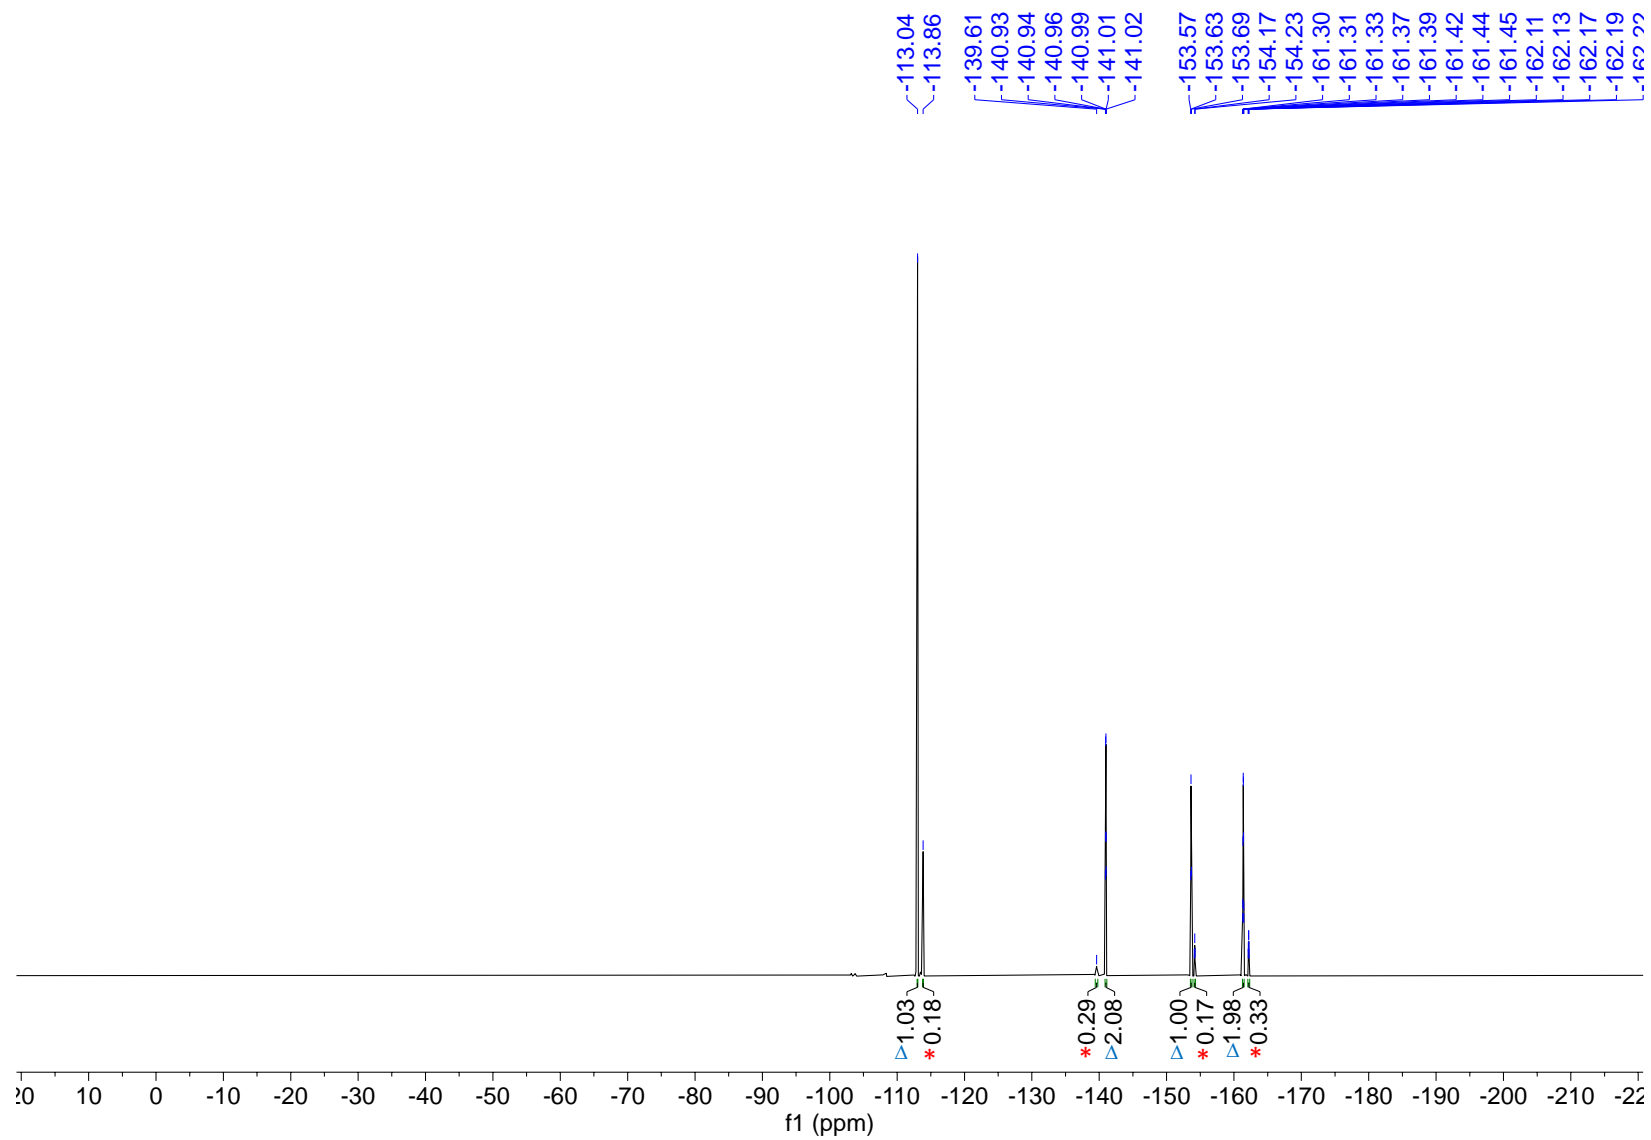



Figure S7:  $^1\text{H}$  NMR (500.2 MHz,  $\text{CDCl}_3$ , 298 K) spectrum of **2b**.

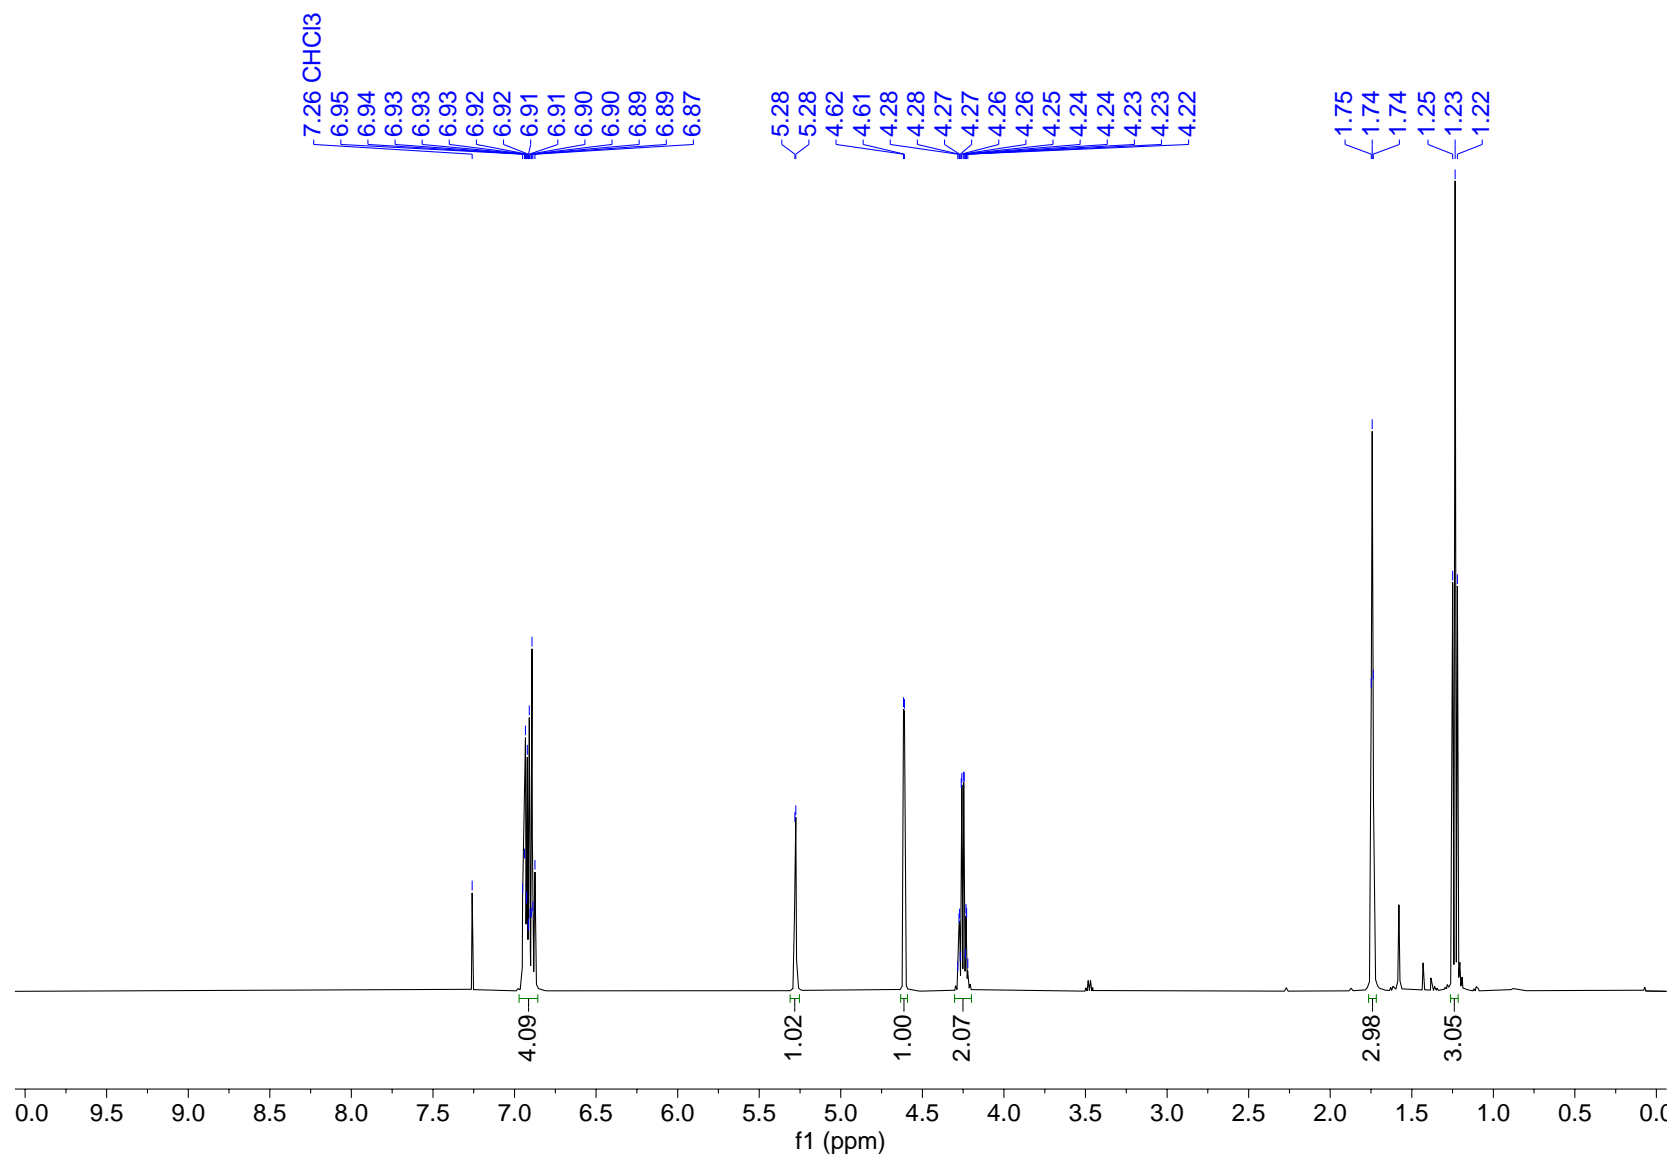

Figure S8:  $^{13}\text{C}$  NMR (125.8 MHz,  $\text{CDCl}_3$ , 298 K) spectrum of **2b**.

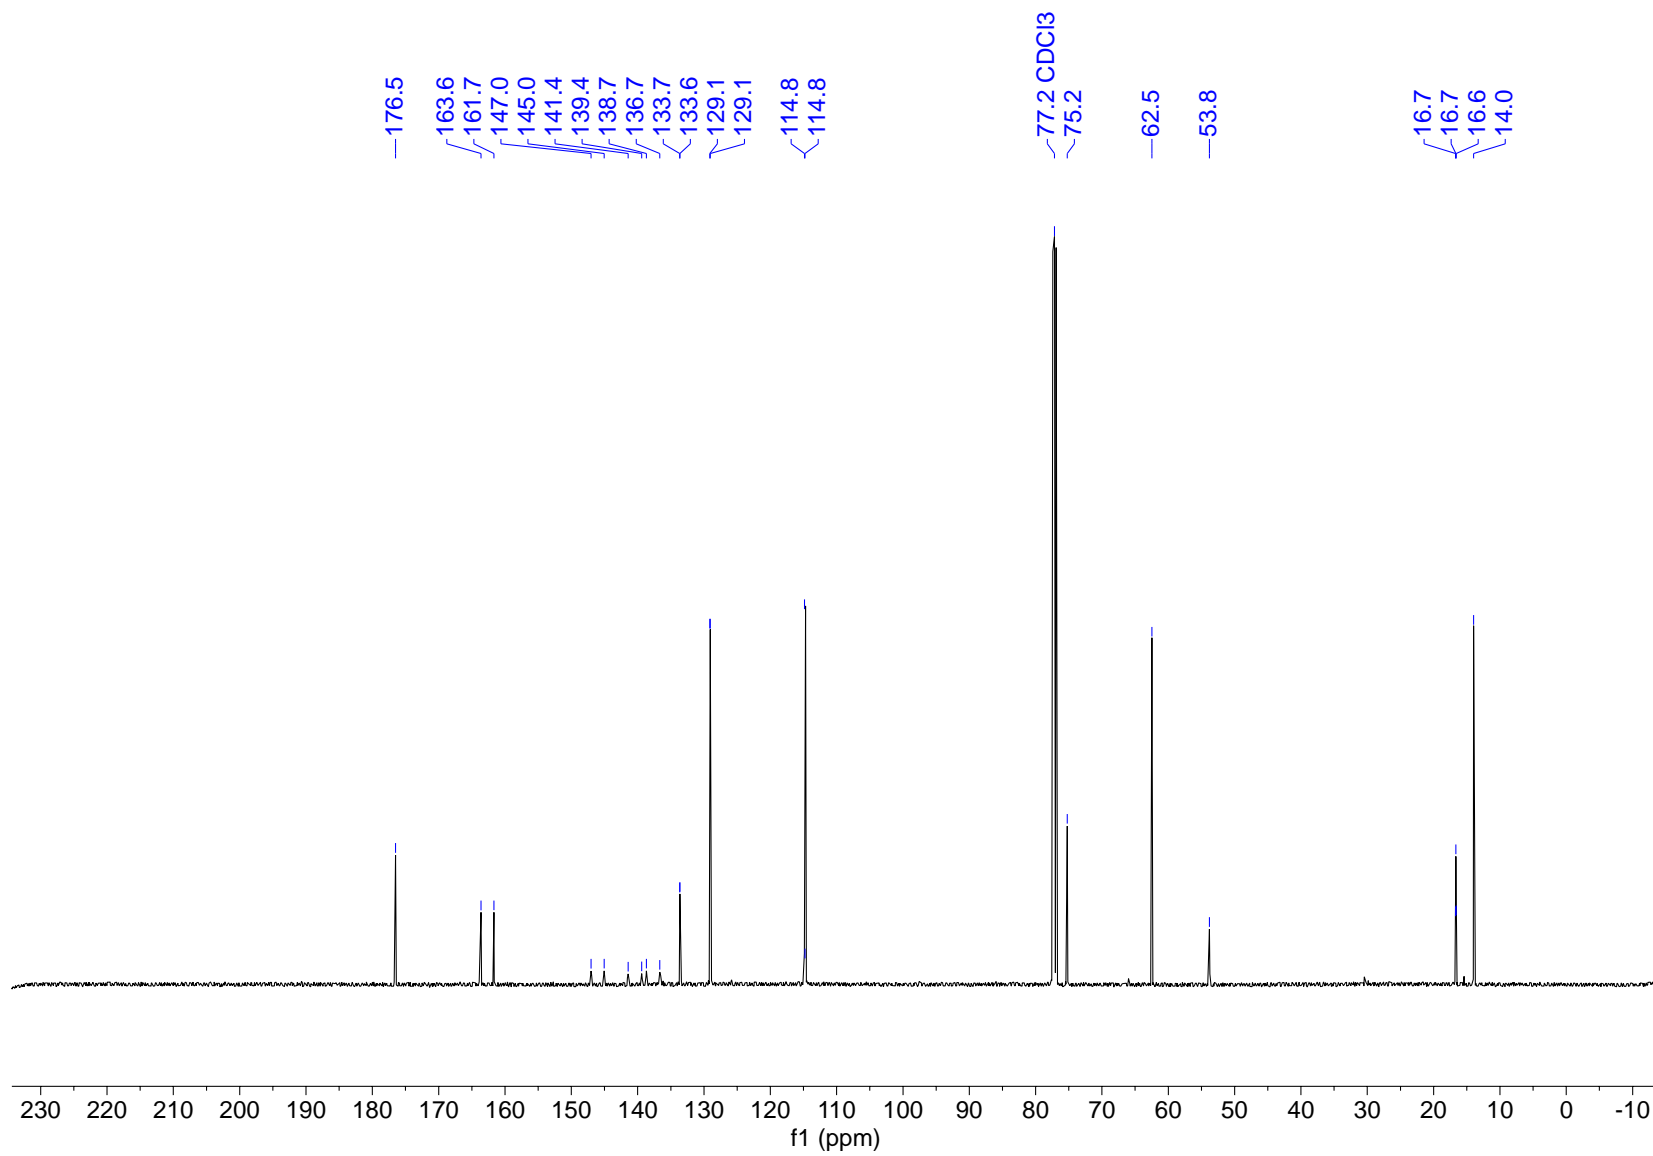

Figure S9:  $^{19}\text{F}$  NMR (470.2 MHz,  $\text{CDCl}_3$ , 298 K) spectrum of **2b**.

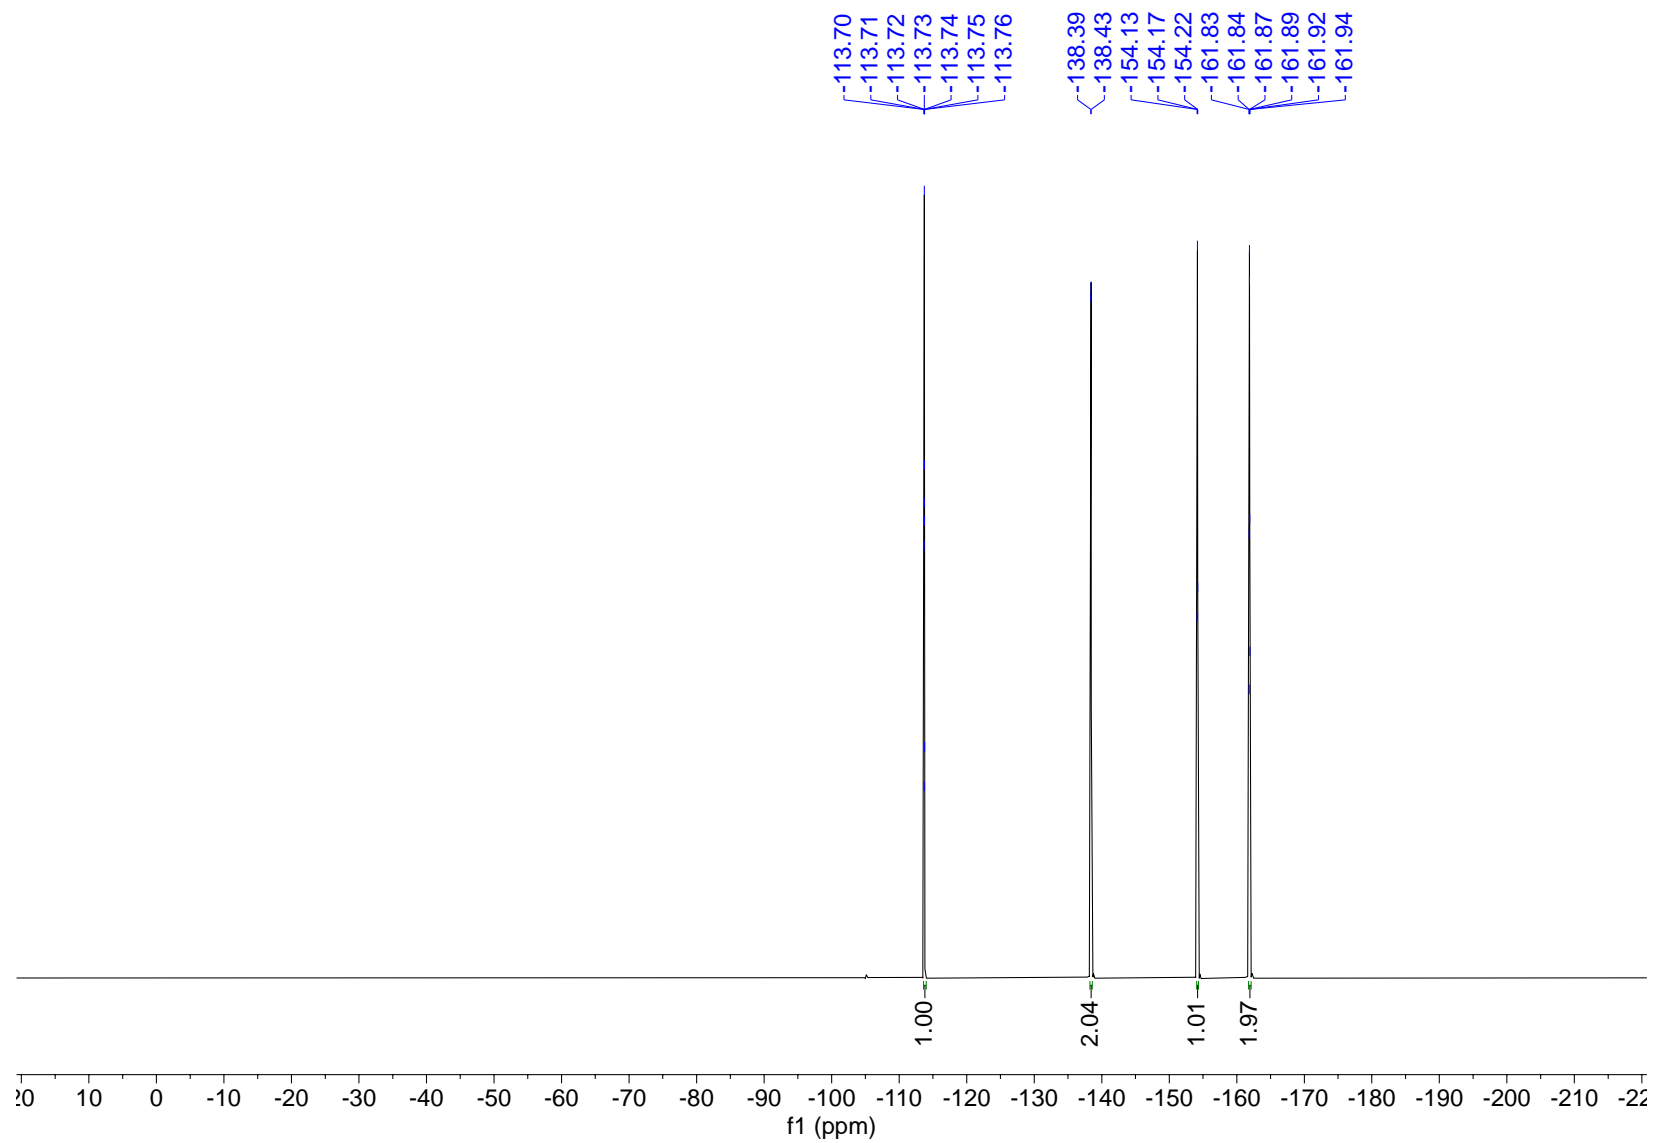

Figure S10:  $^1\text{H}$  NMR (500.2 MHz,  $\text{CDCl}_3$ , 298 K) spectrum of **2r**.

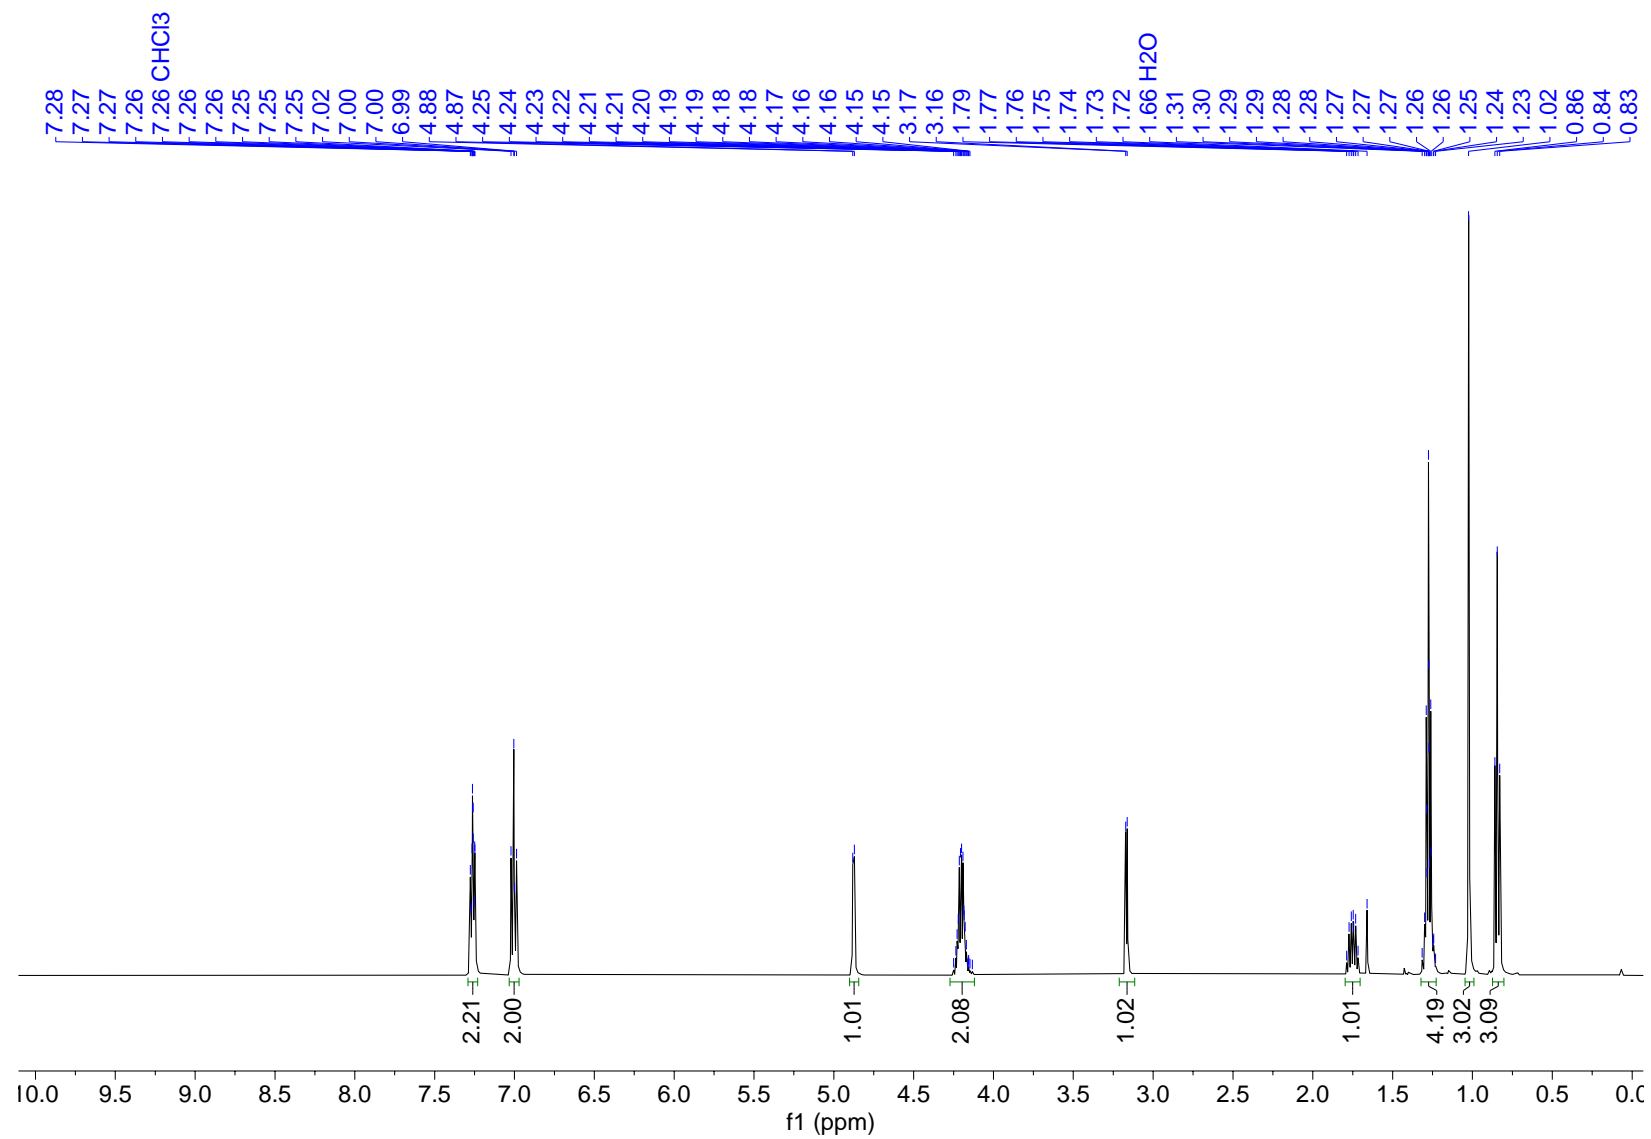

Figure S11:  $^{13}\text{C}$  NMR (125.8 MHz,  $\text{CDCl}_3$ , 298 K) spectrum of **2r**.

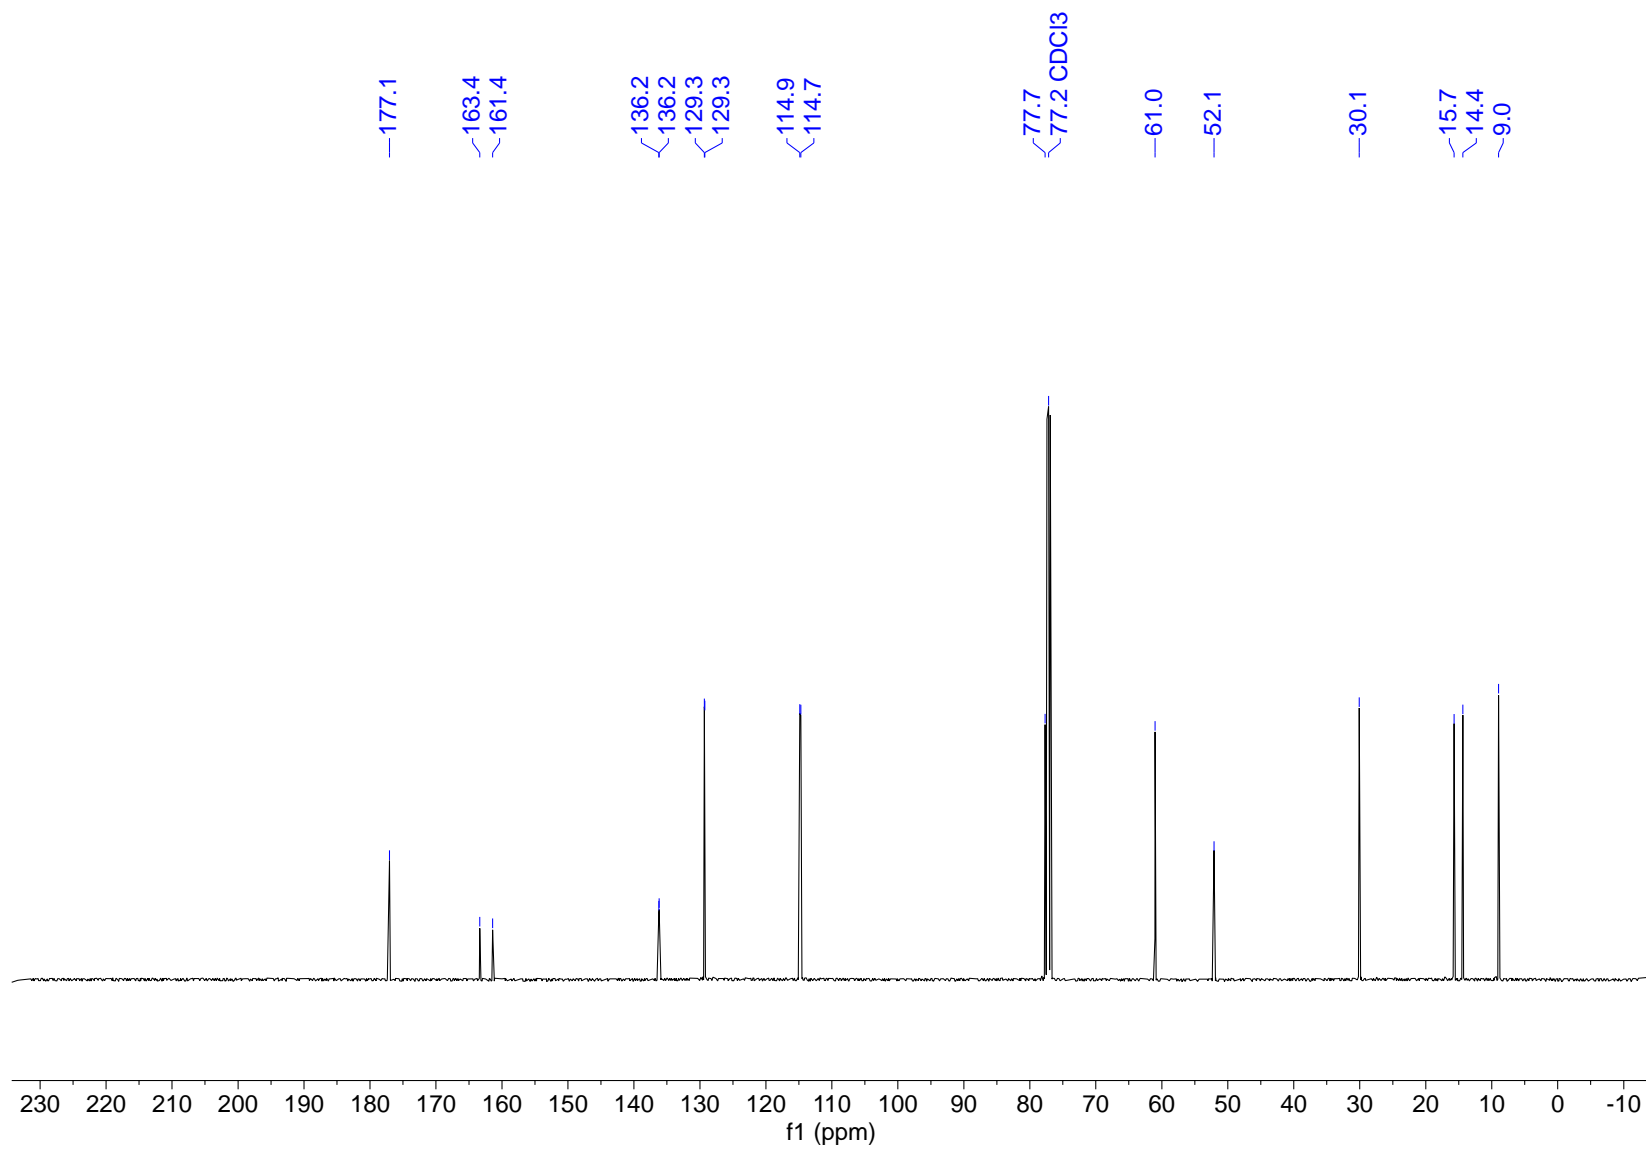

Figure S12:  $^{19}\text{F}$  NMR (470.2 MHz,  $\text{CDCl}_3$ , 298 K) spectrum of **2r**.

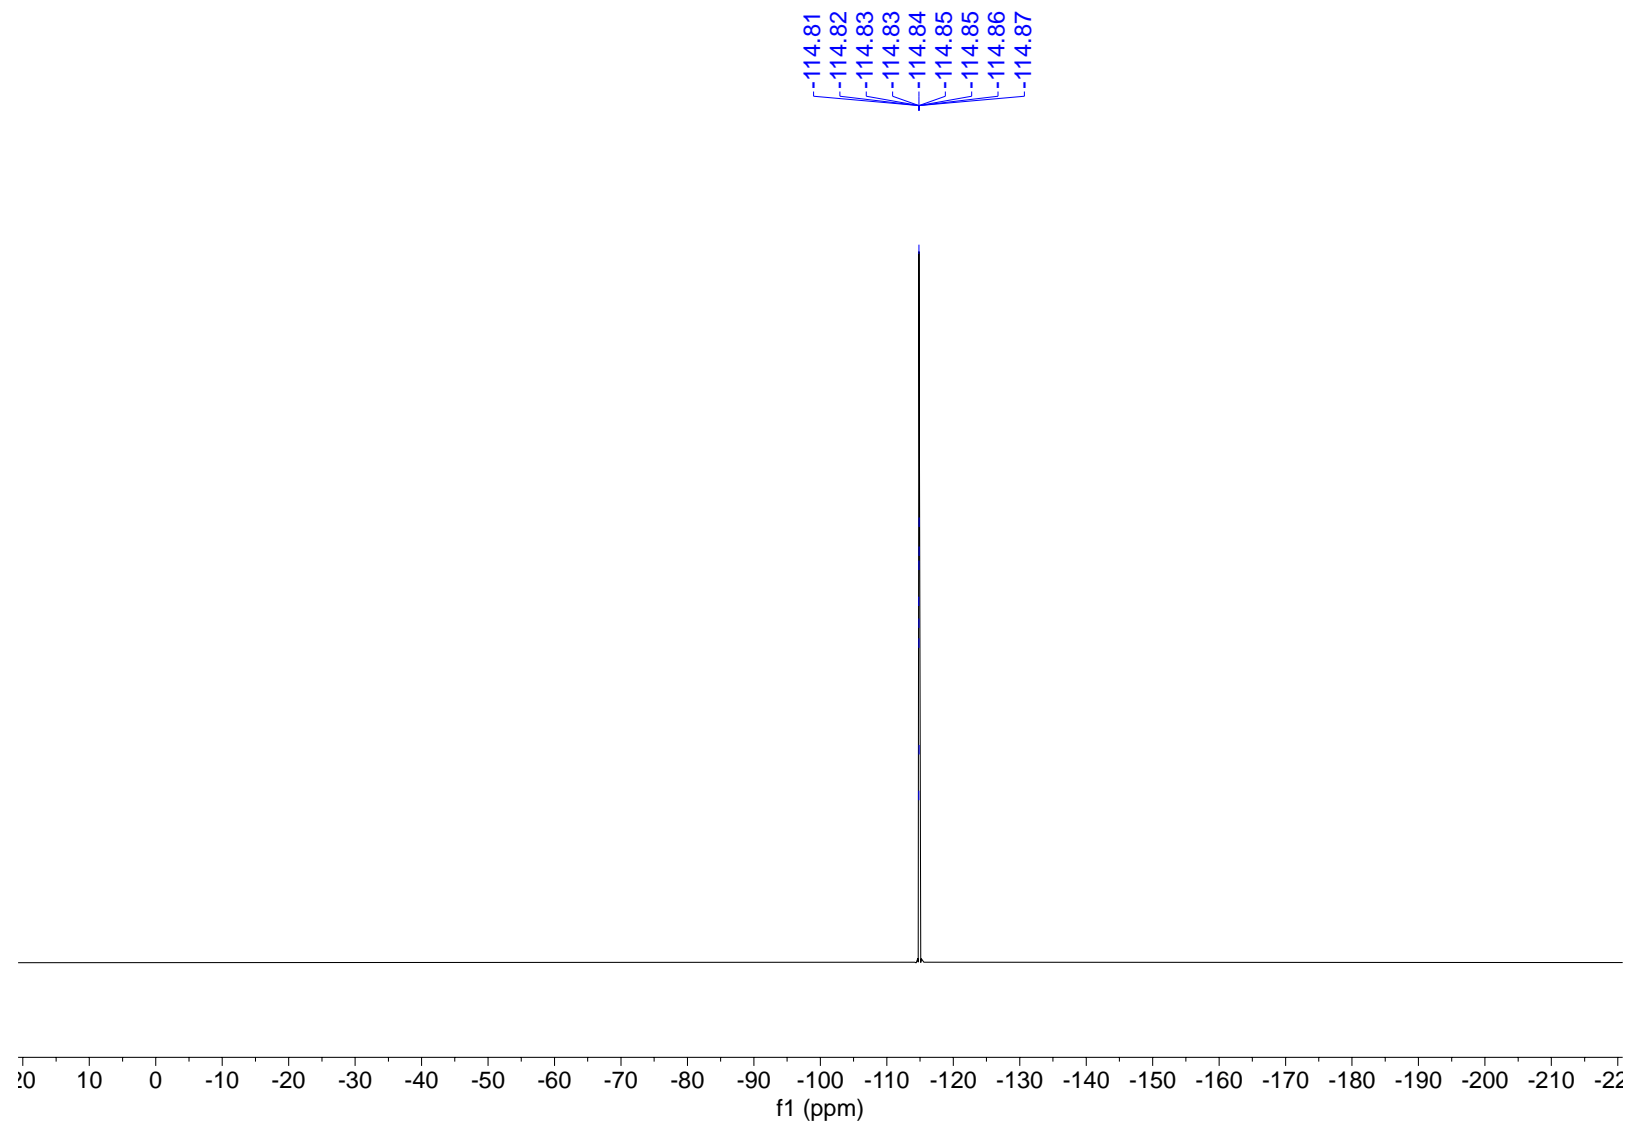

Figure S13:  $^1\text{H}$  NMR (400.1 MHz,  $\text{CDCl}_3$ , 298 K) spectrum of **2c**.

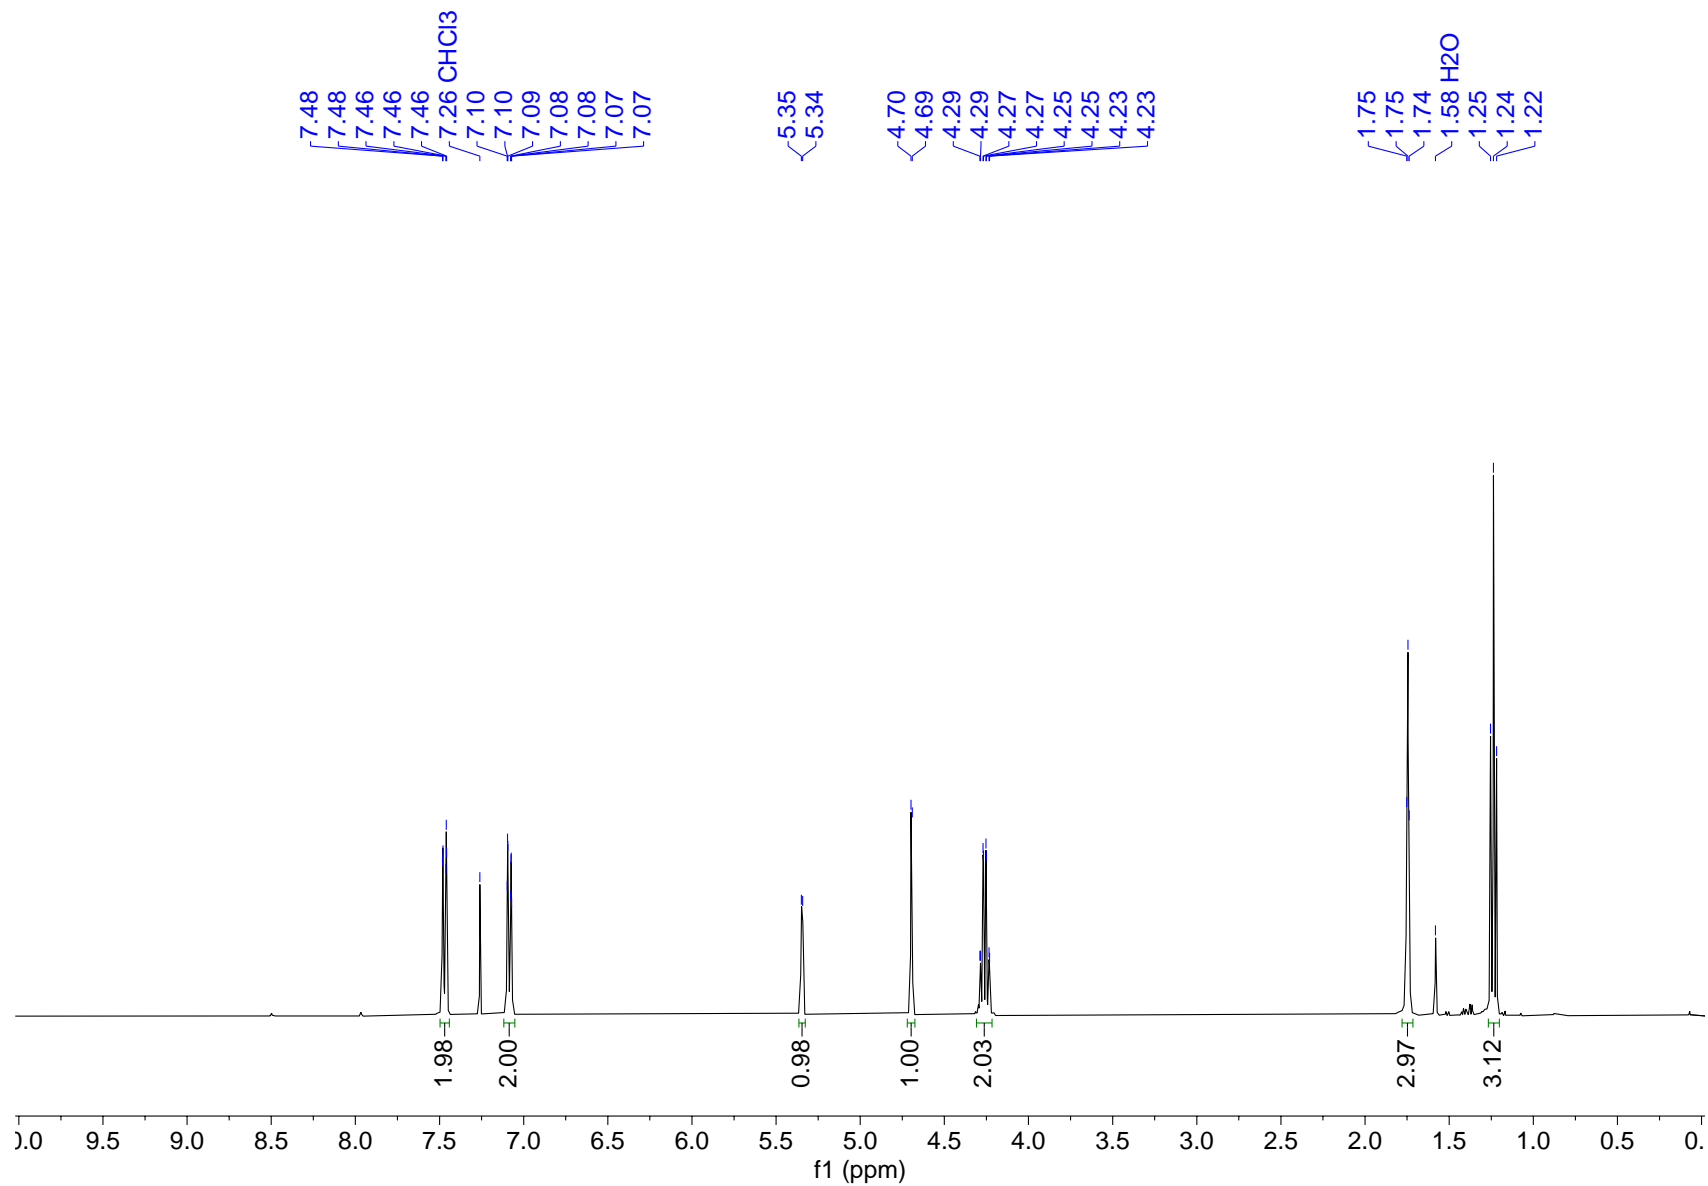

Figure S14:  $^{13}\text{C}$  NMR (125.8 MHz,  $\text{CDCl}_3$ , 298 K) spectrum of **2c**.

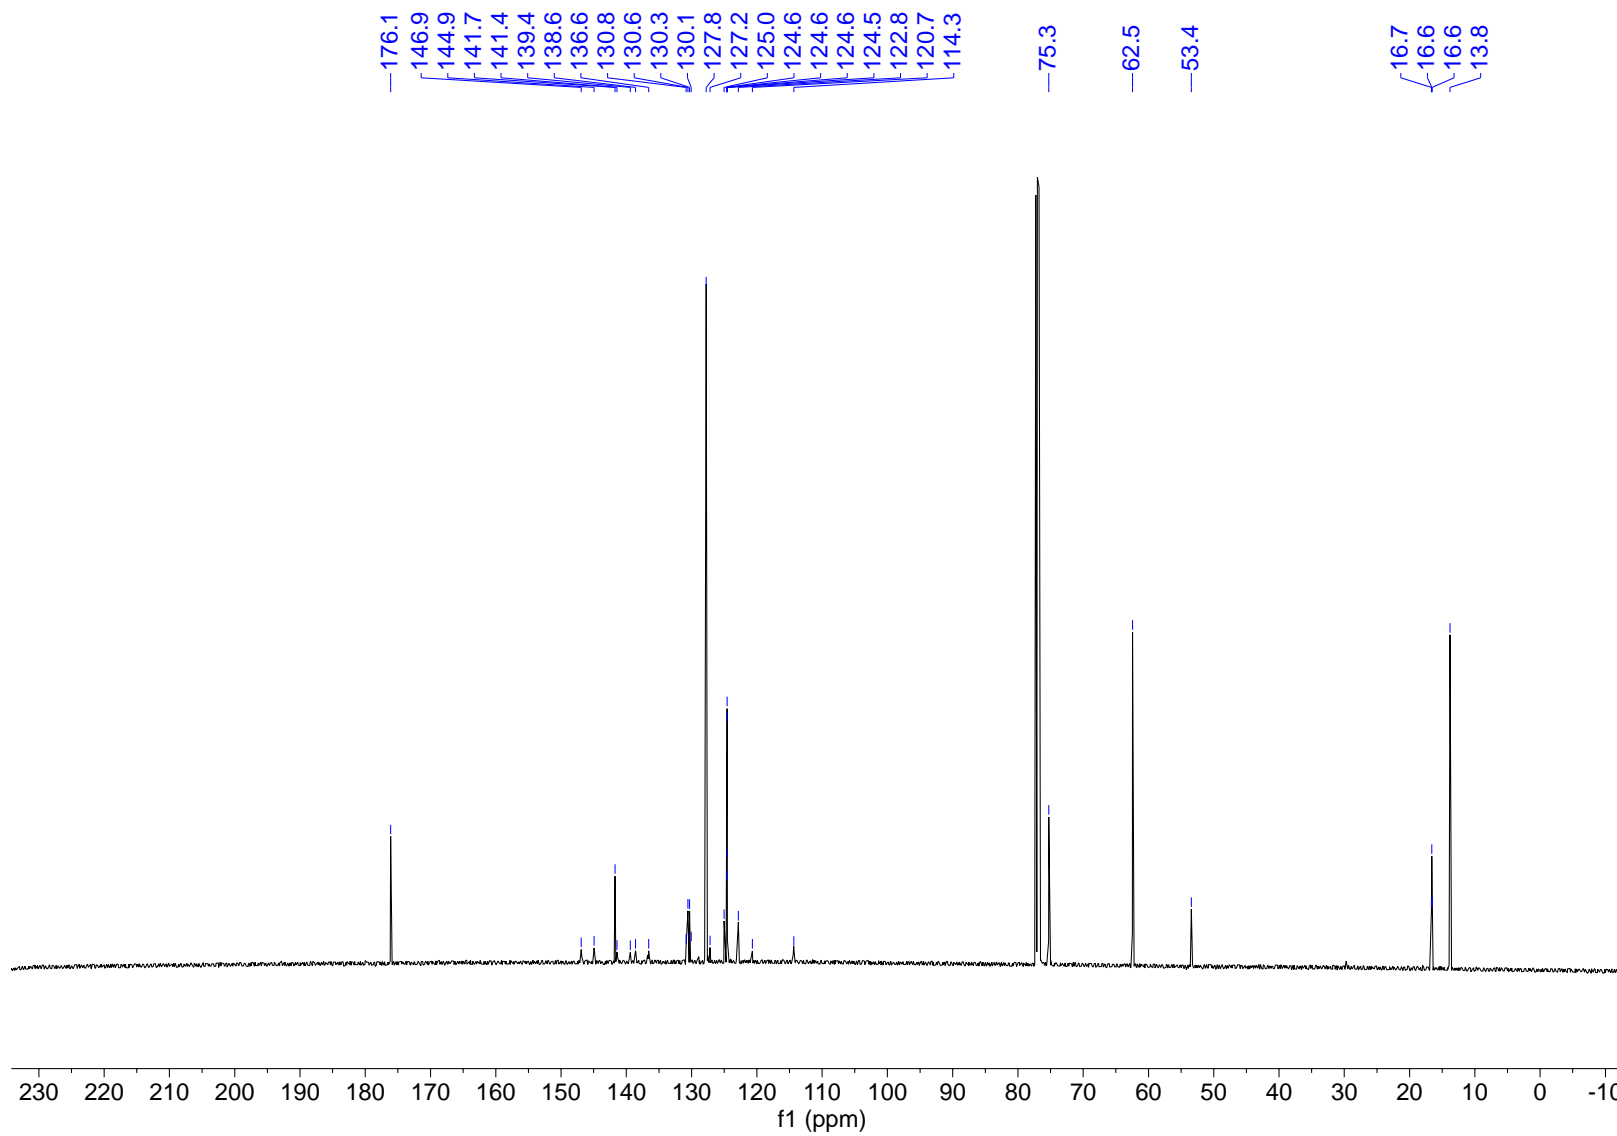



Figure S15:  $^{19}\text{F}$  NMR (376.5 MHz,  $\text{CDCl}_3$ , 298 K) spectrum of **2c**.

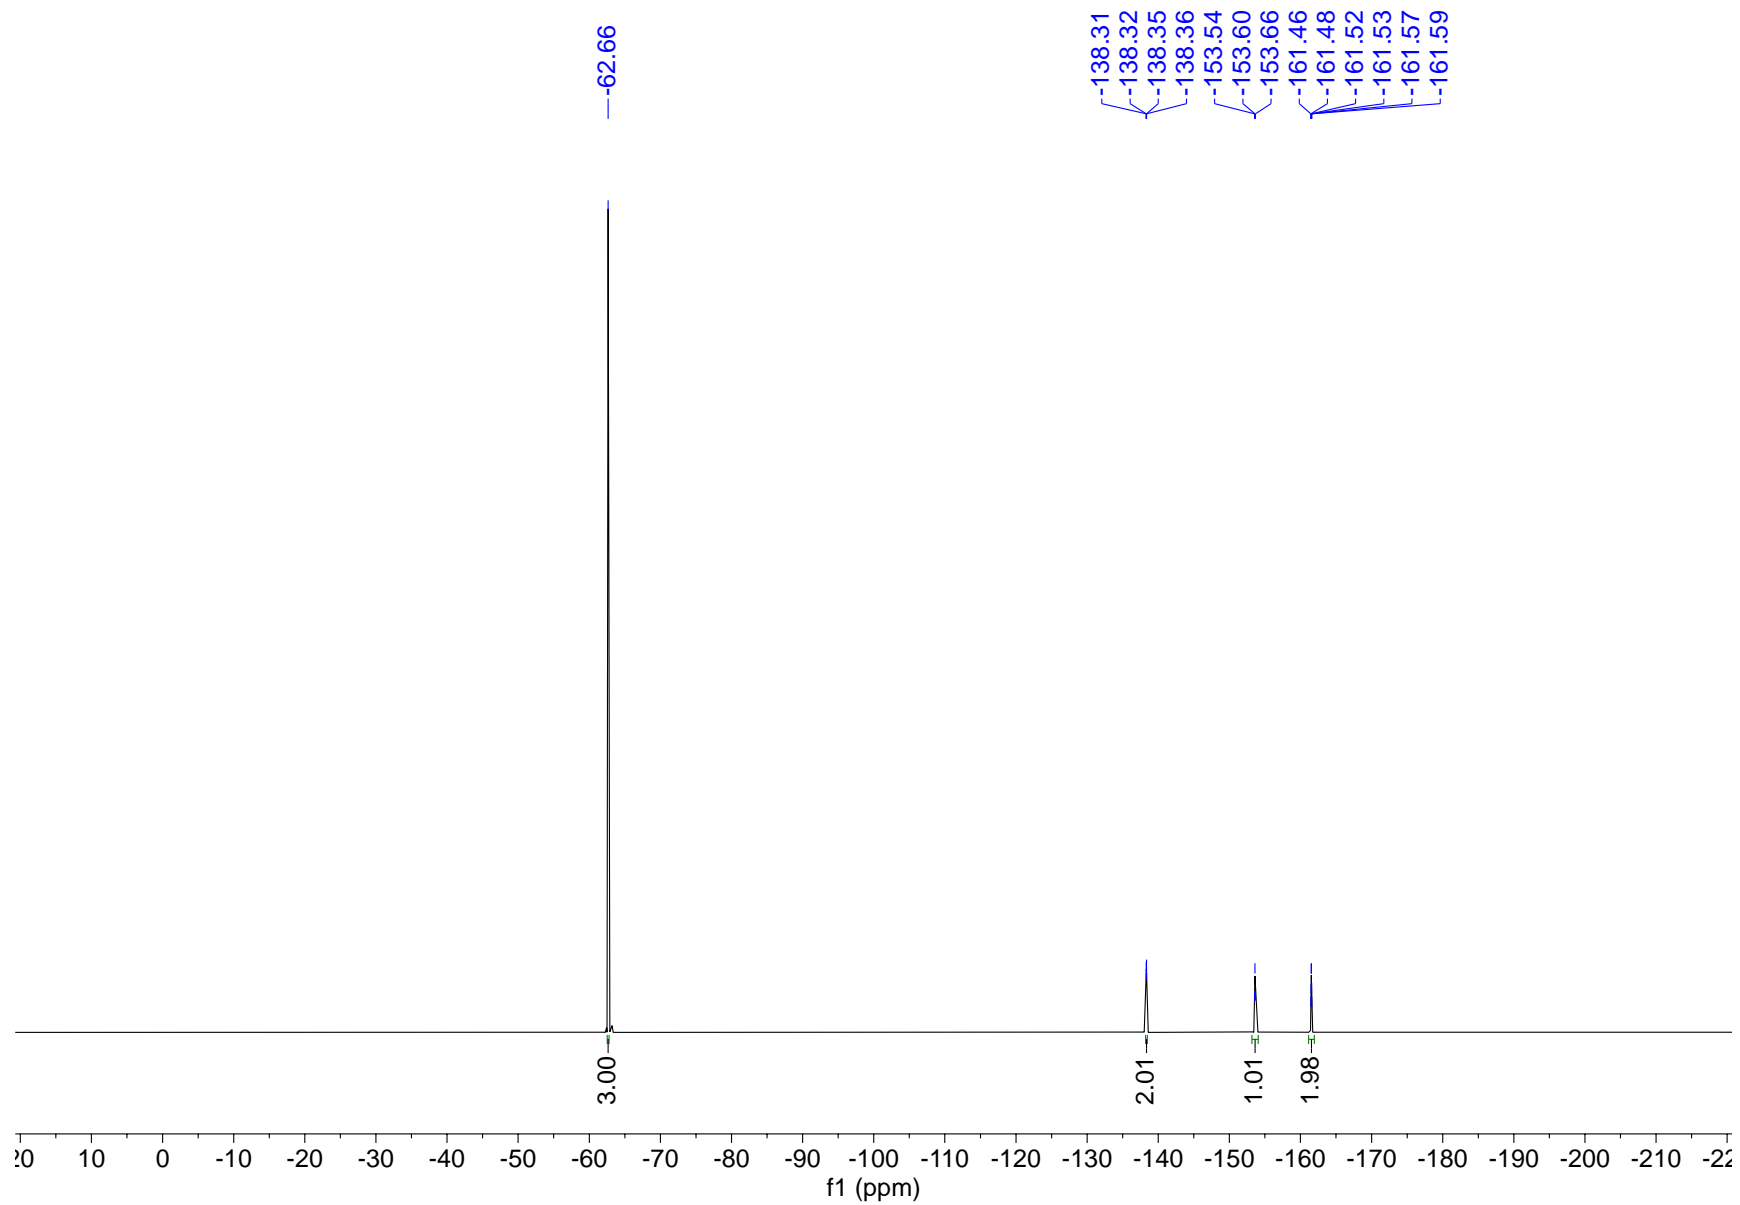

Figure S16:  $^1\text{H}$  NMR (400.1 MHz,  $\text{CDCl}_3$ , 298 K) spectrum of **2d**.

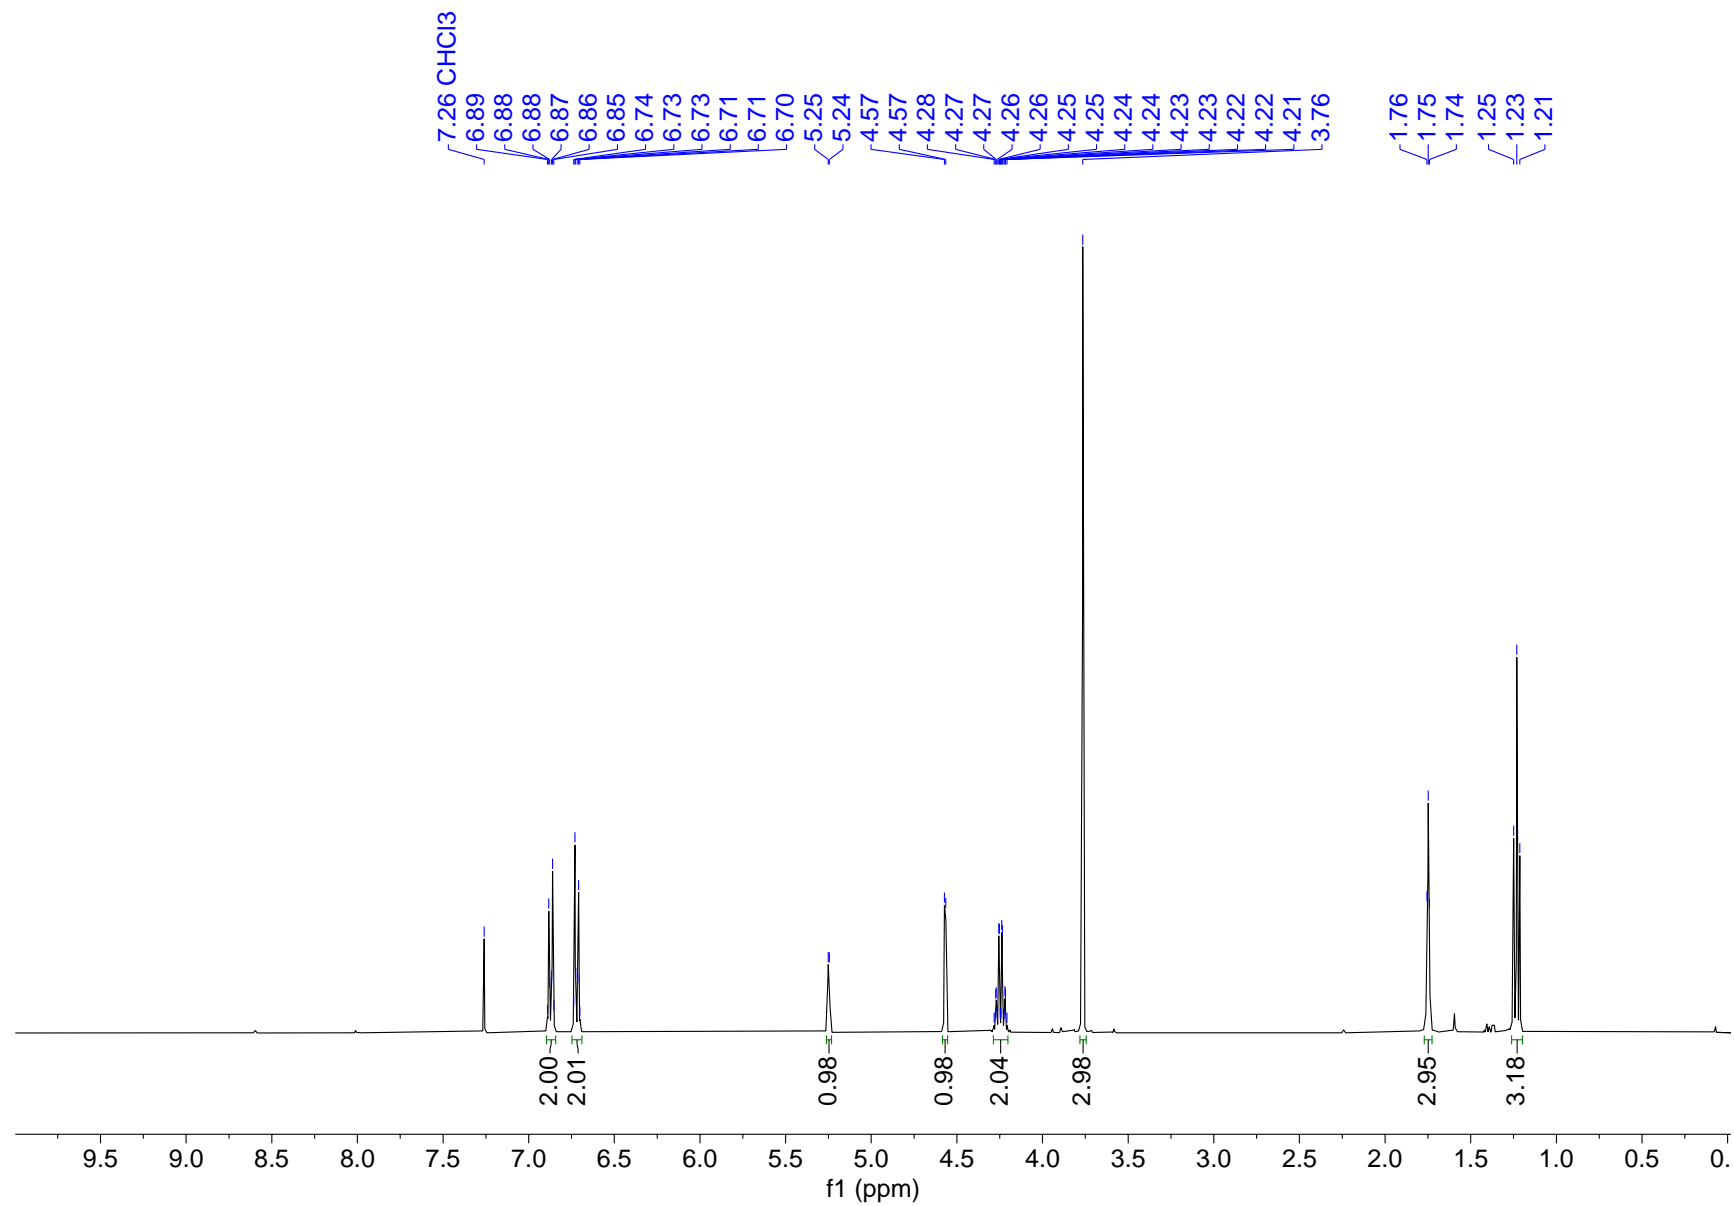

Figure S17:  $^{13}\text{C}$  NMR (125.8 MHz,  $\text{CDCl}_3$ , 298 K) spectrum of **2d**.

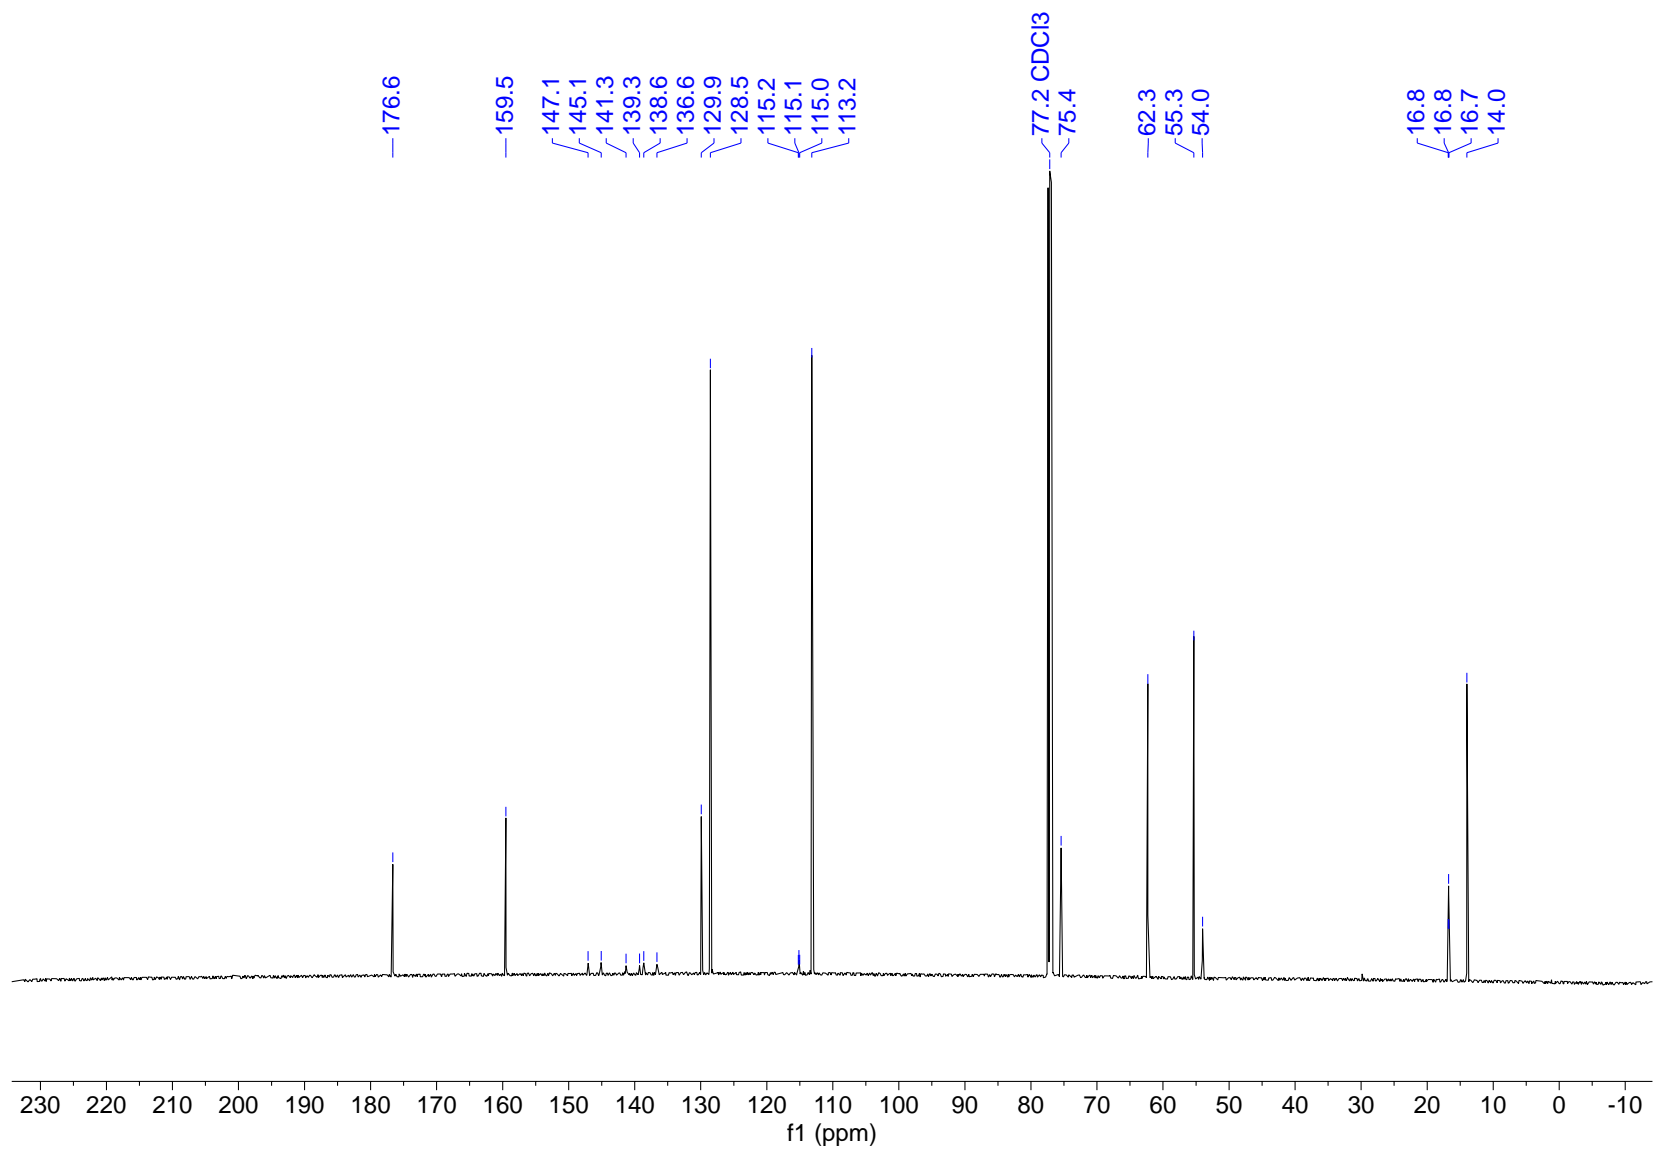

Figure S18:  $^{19}\text{F}$  NMR (376.5 MHz,  $\text{CDCl}_3$ , 298 K) spectrum of **2d**.

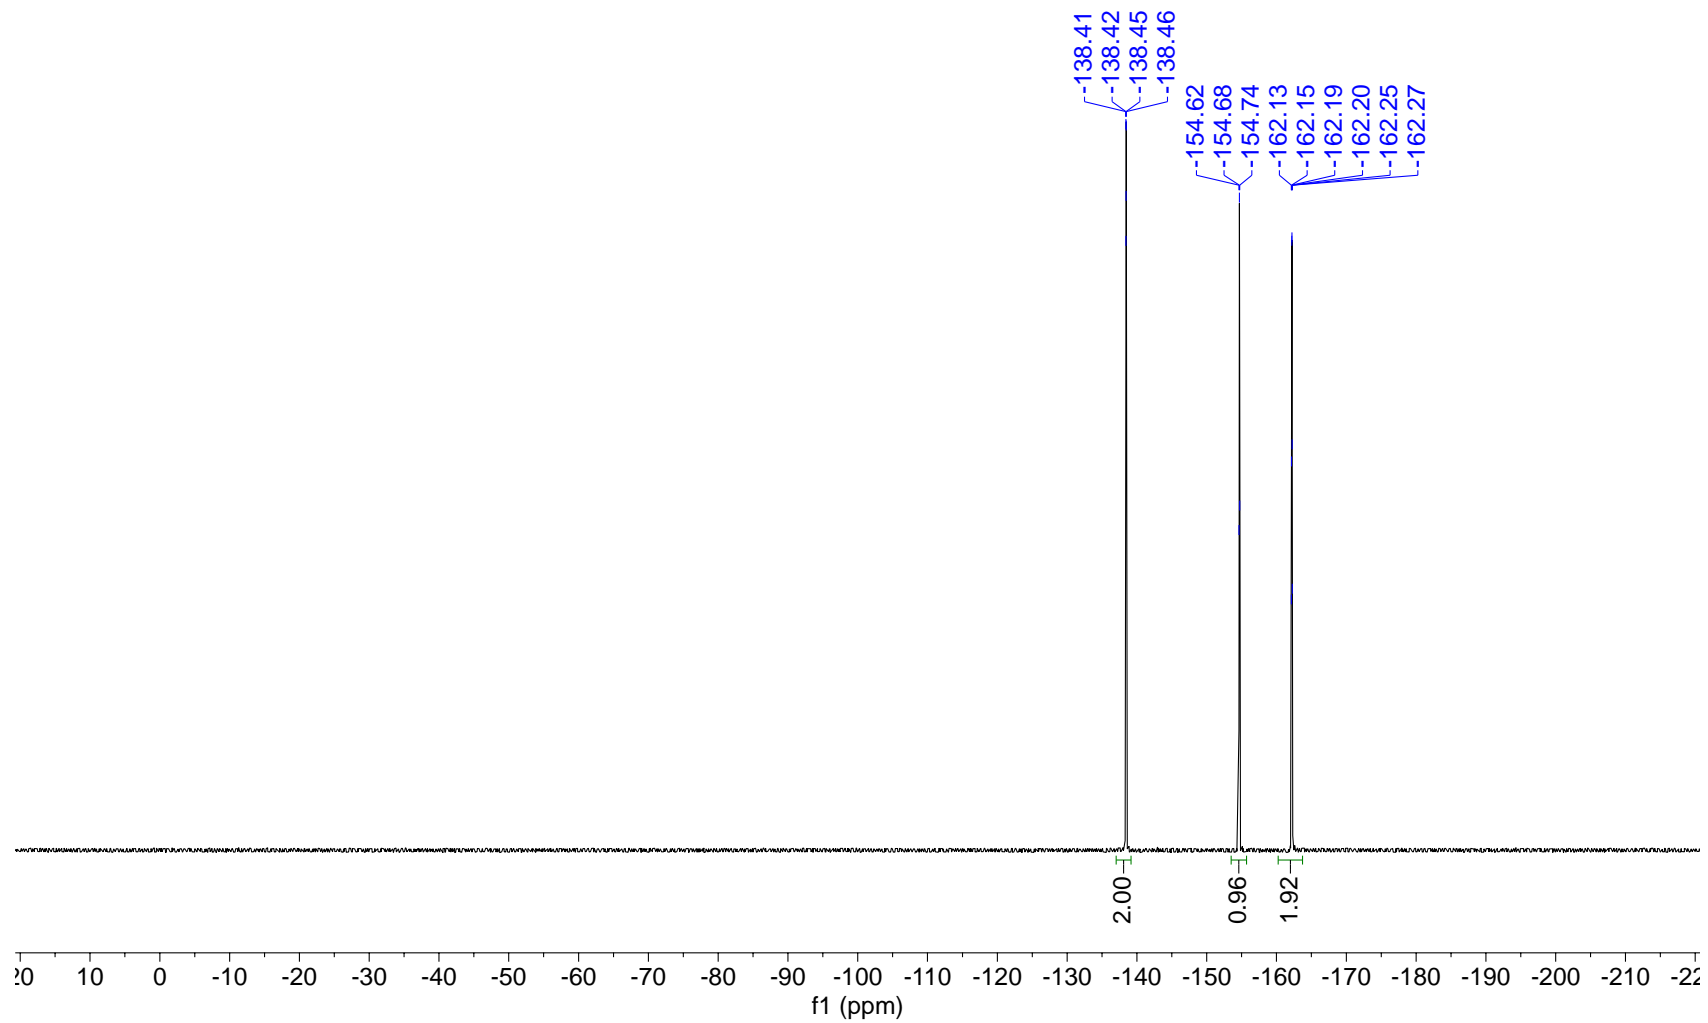

Figure S19:  $^1\text{H}$  NMR (400.1 MHz,  $\text{CDCl}_3$ , 298 K) spectrum of **2e**.

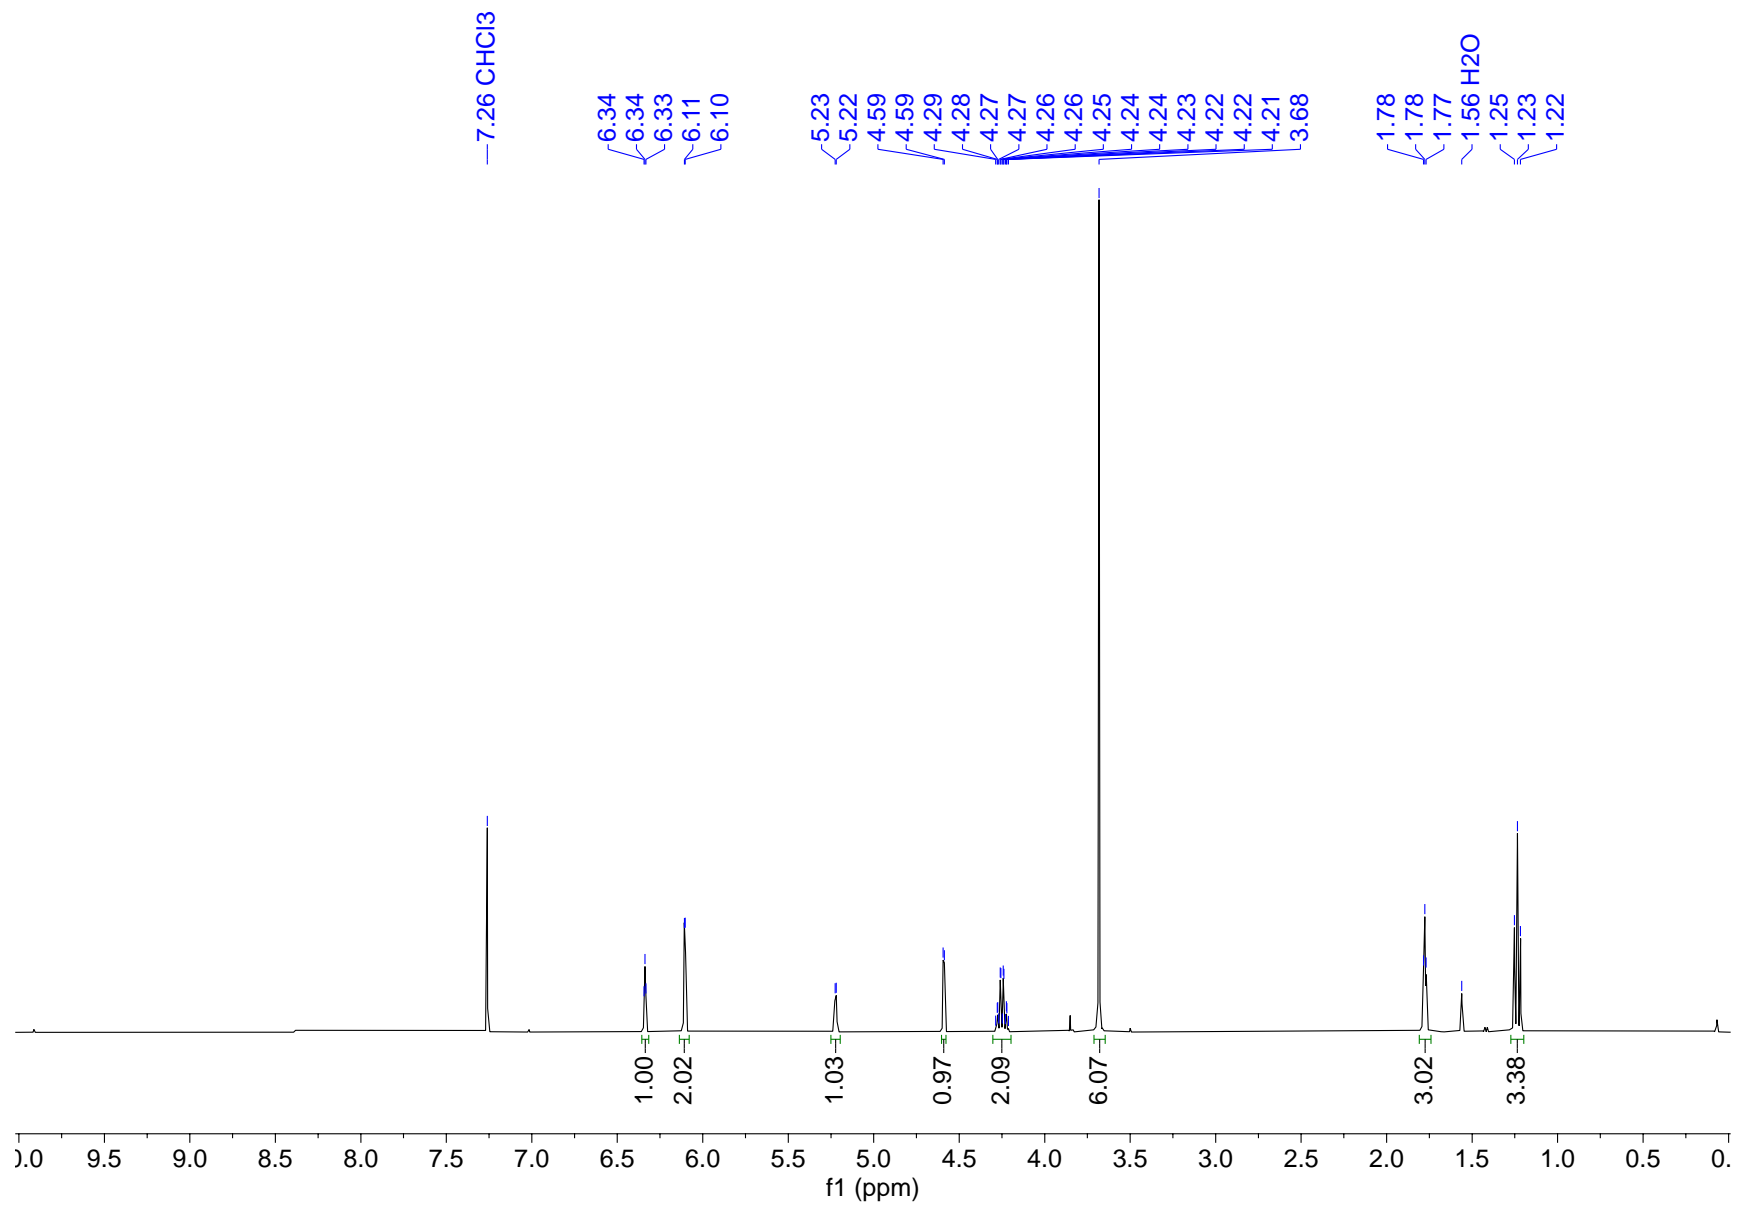

Figure S20:  $^{13}\text{C}$  NMR (125.8 MHz,  $\text{CDCl}_3$ , 298 K) spectrum of **2e**.

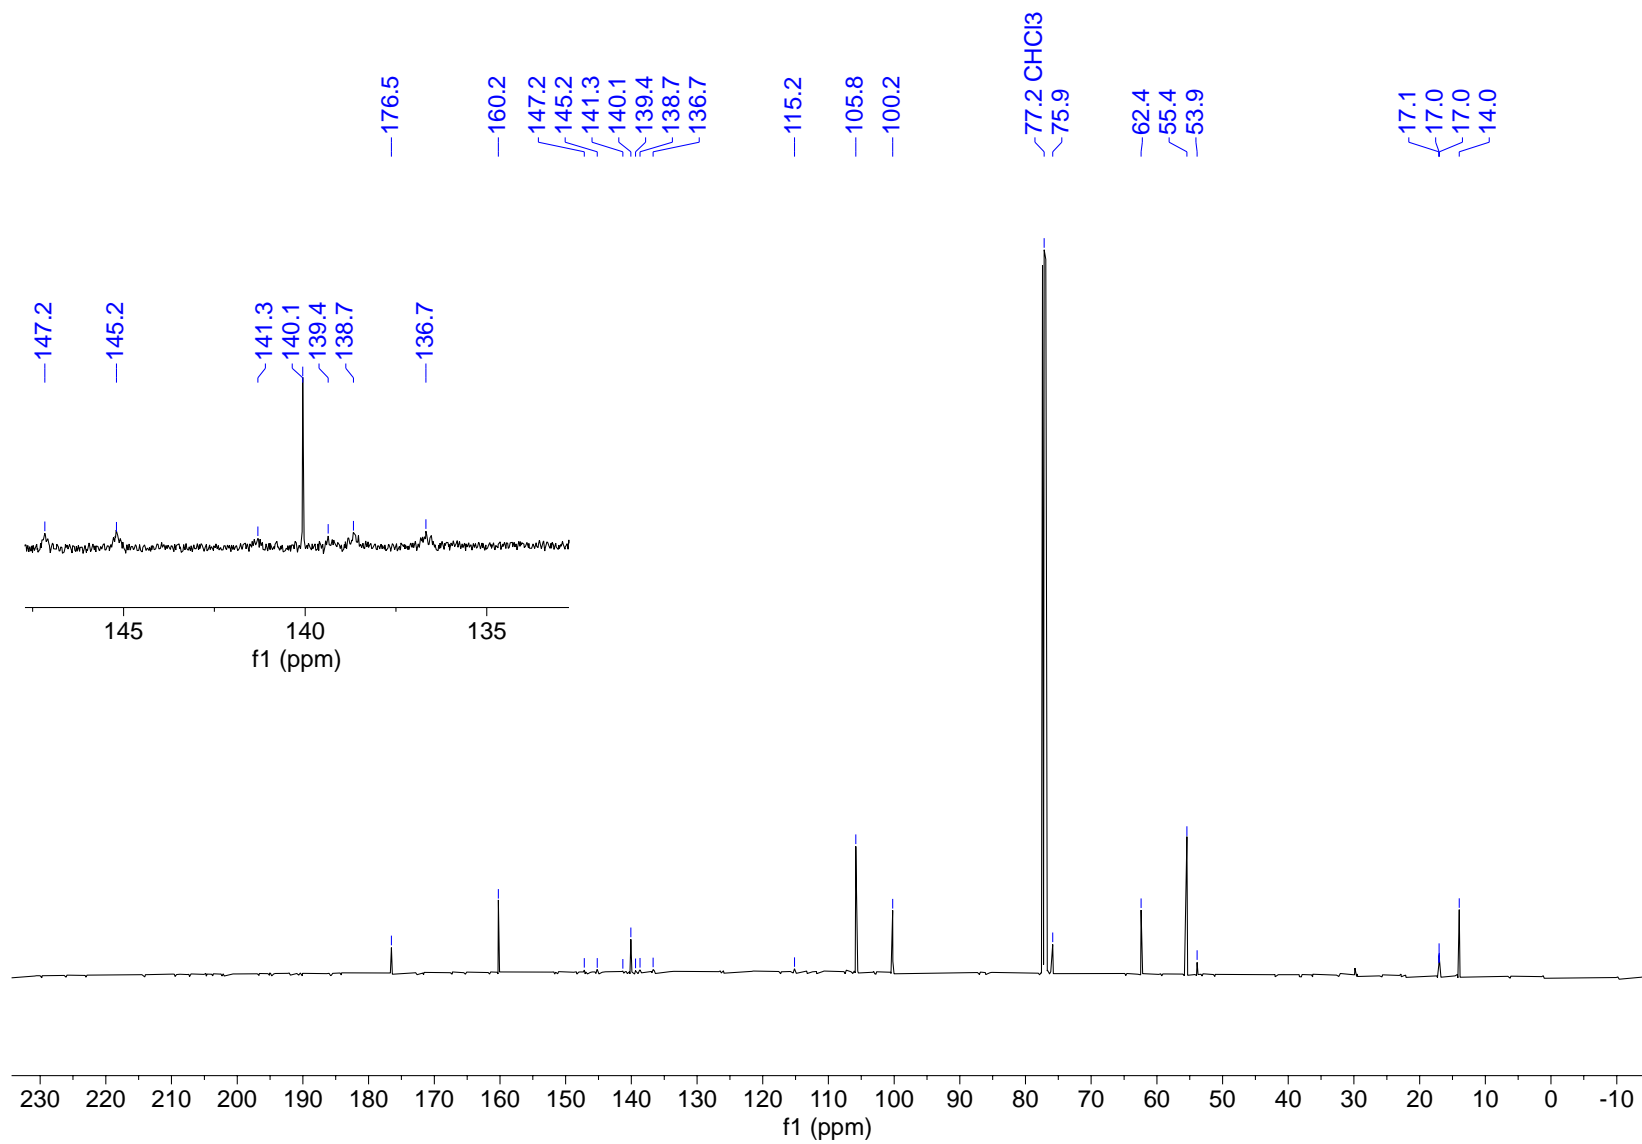

Figure S21:  $^{19}\text{F}$  NMR (376.5 MHz,  $\text{CDCl}_3$ , 298 K) spectrum of **2e**.

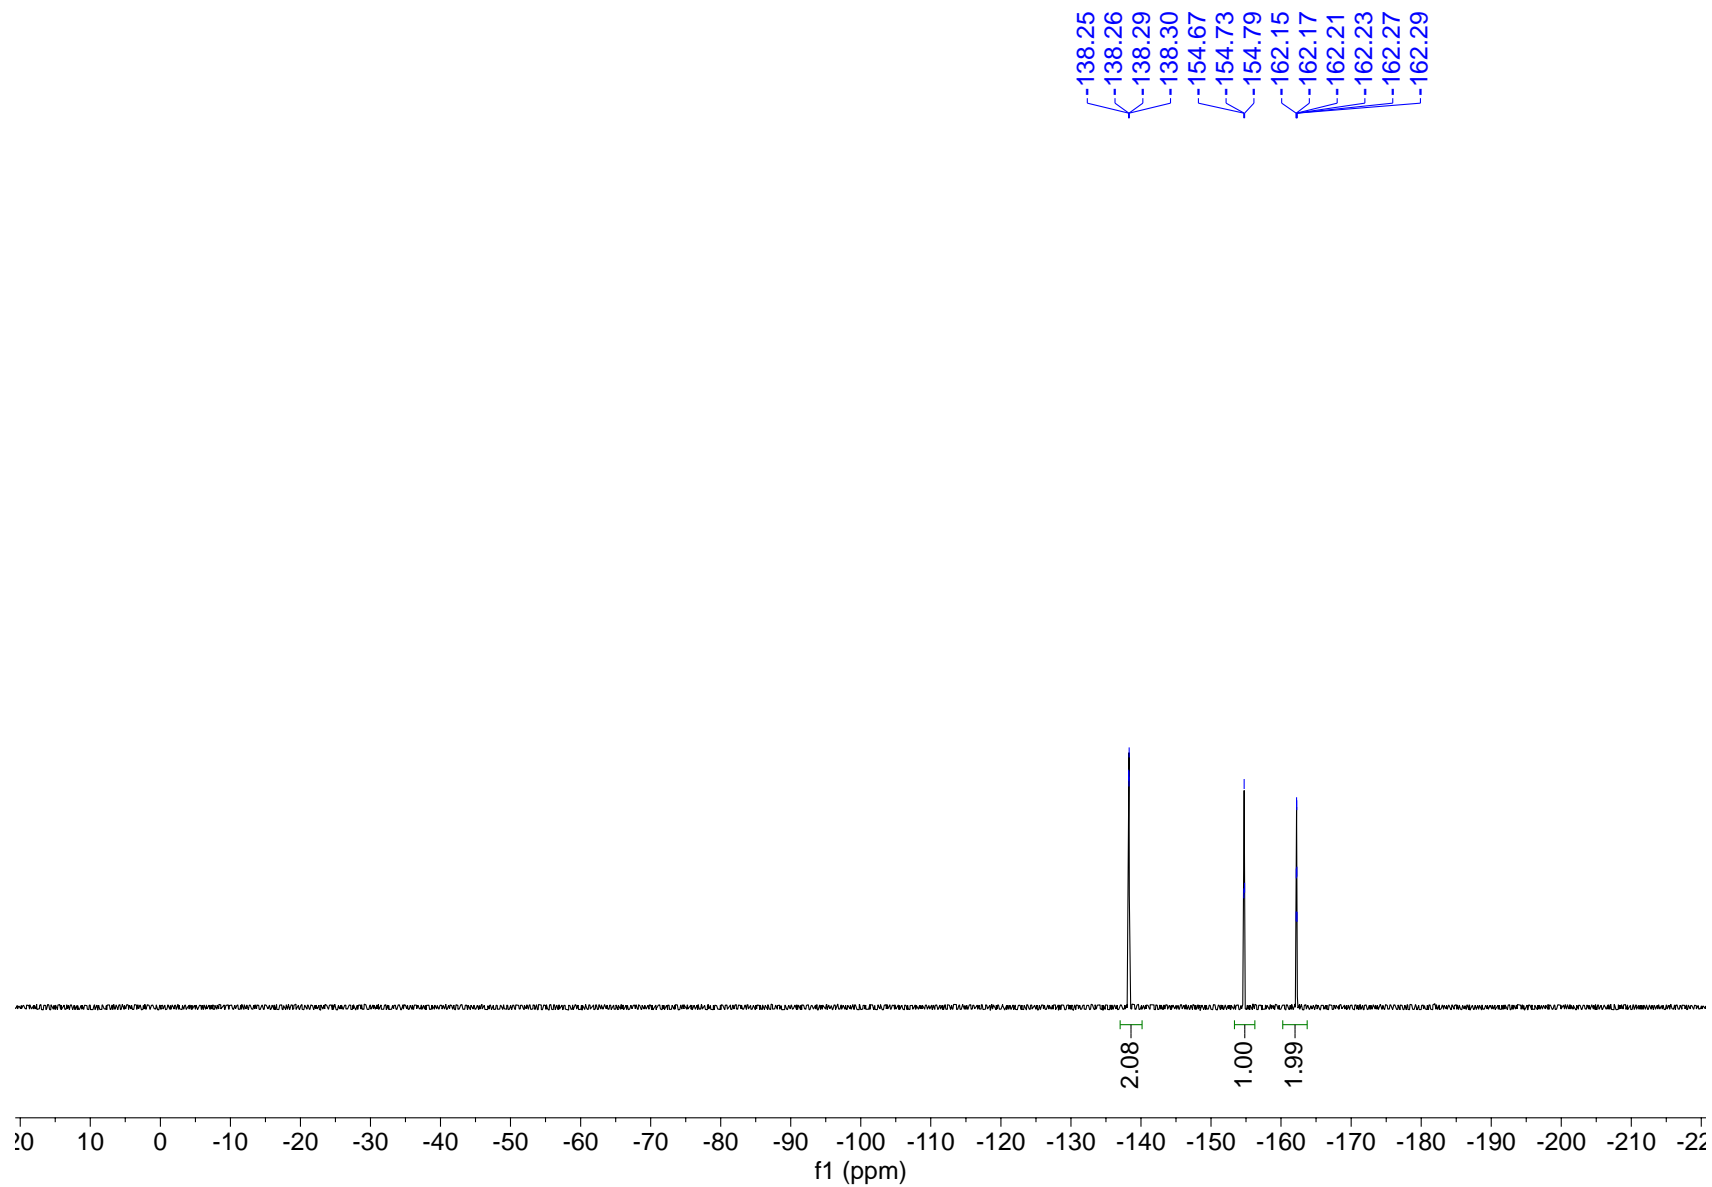

Figure S22:  $^1\text{H}$  NMR (400.1 MHz,  $\text{CDCl}_3$ , 298 K) spectrum of **2f**.

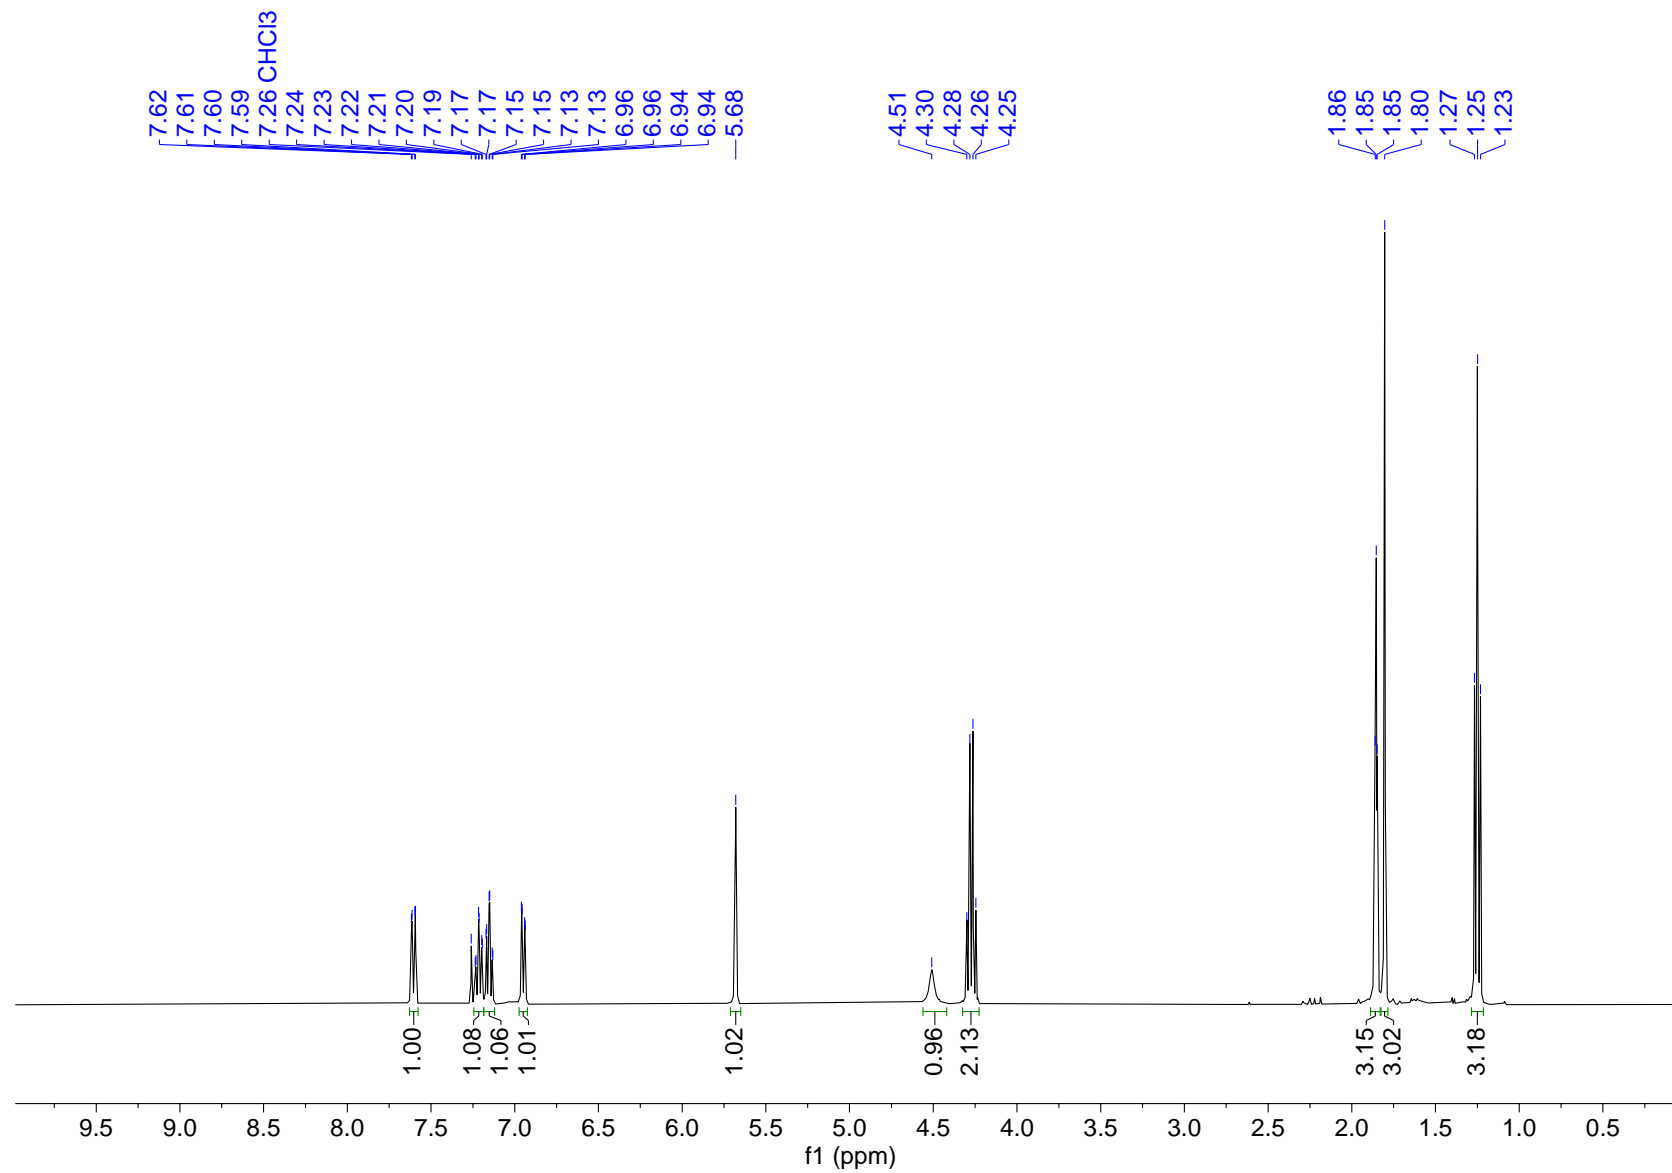



Figure S23:  $^{13}\text{C}$  NMR (125.8 MHz,  $\text{CDCl}_3$ , 298 K) spectrum of **2f**.

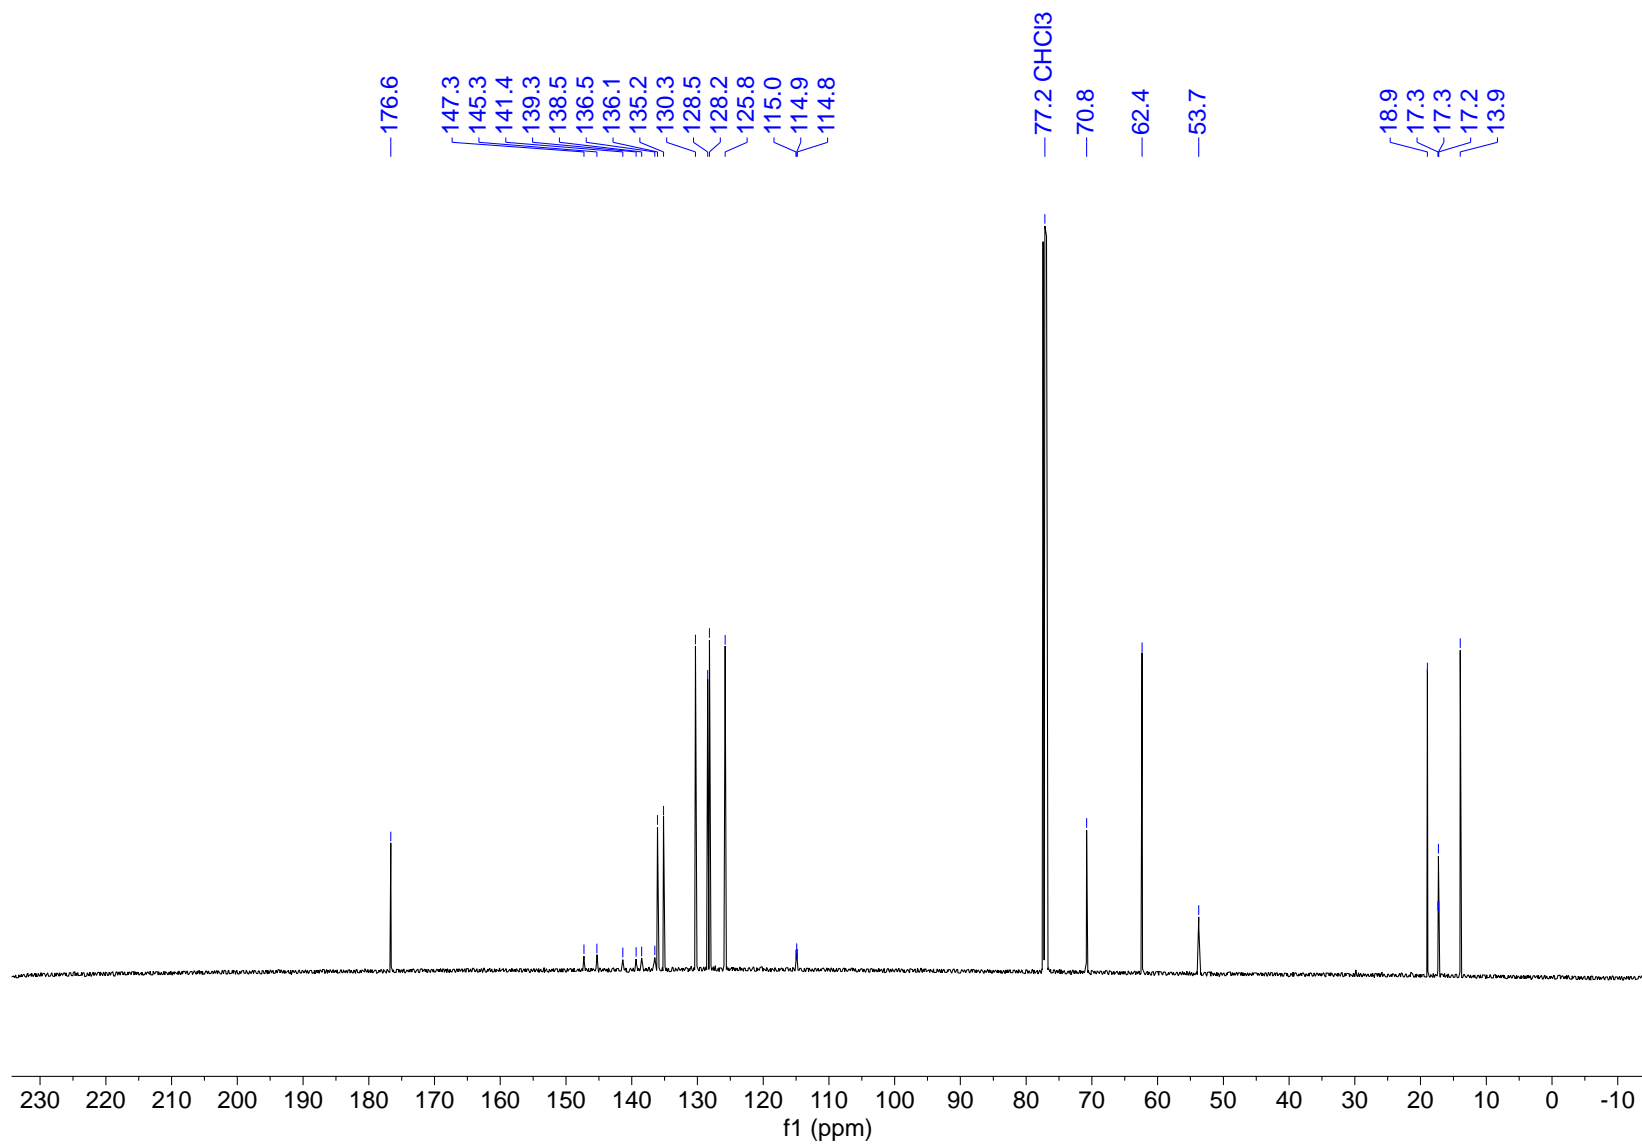

Figure S24:  $^{19}\text{F}$  NMR (376.5 MHz,  $\text{CDCl}_3$ , 298 K) spectrum of **2f**.

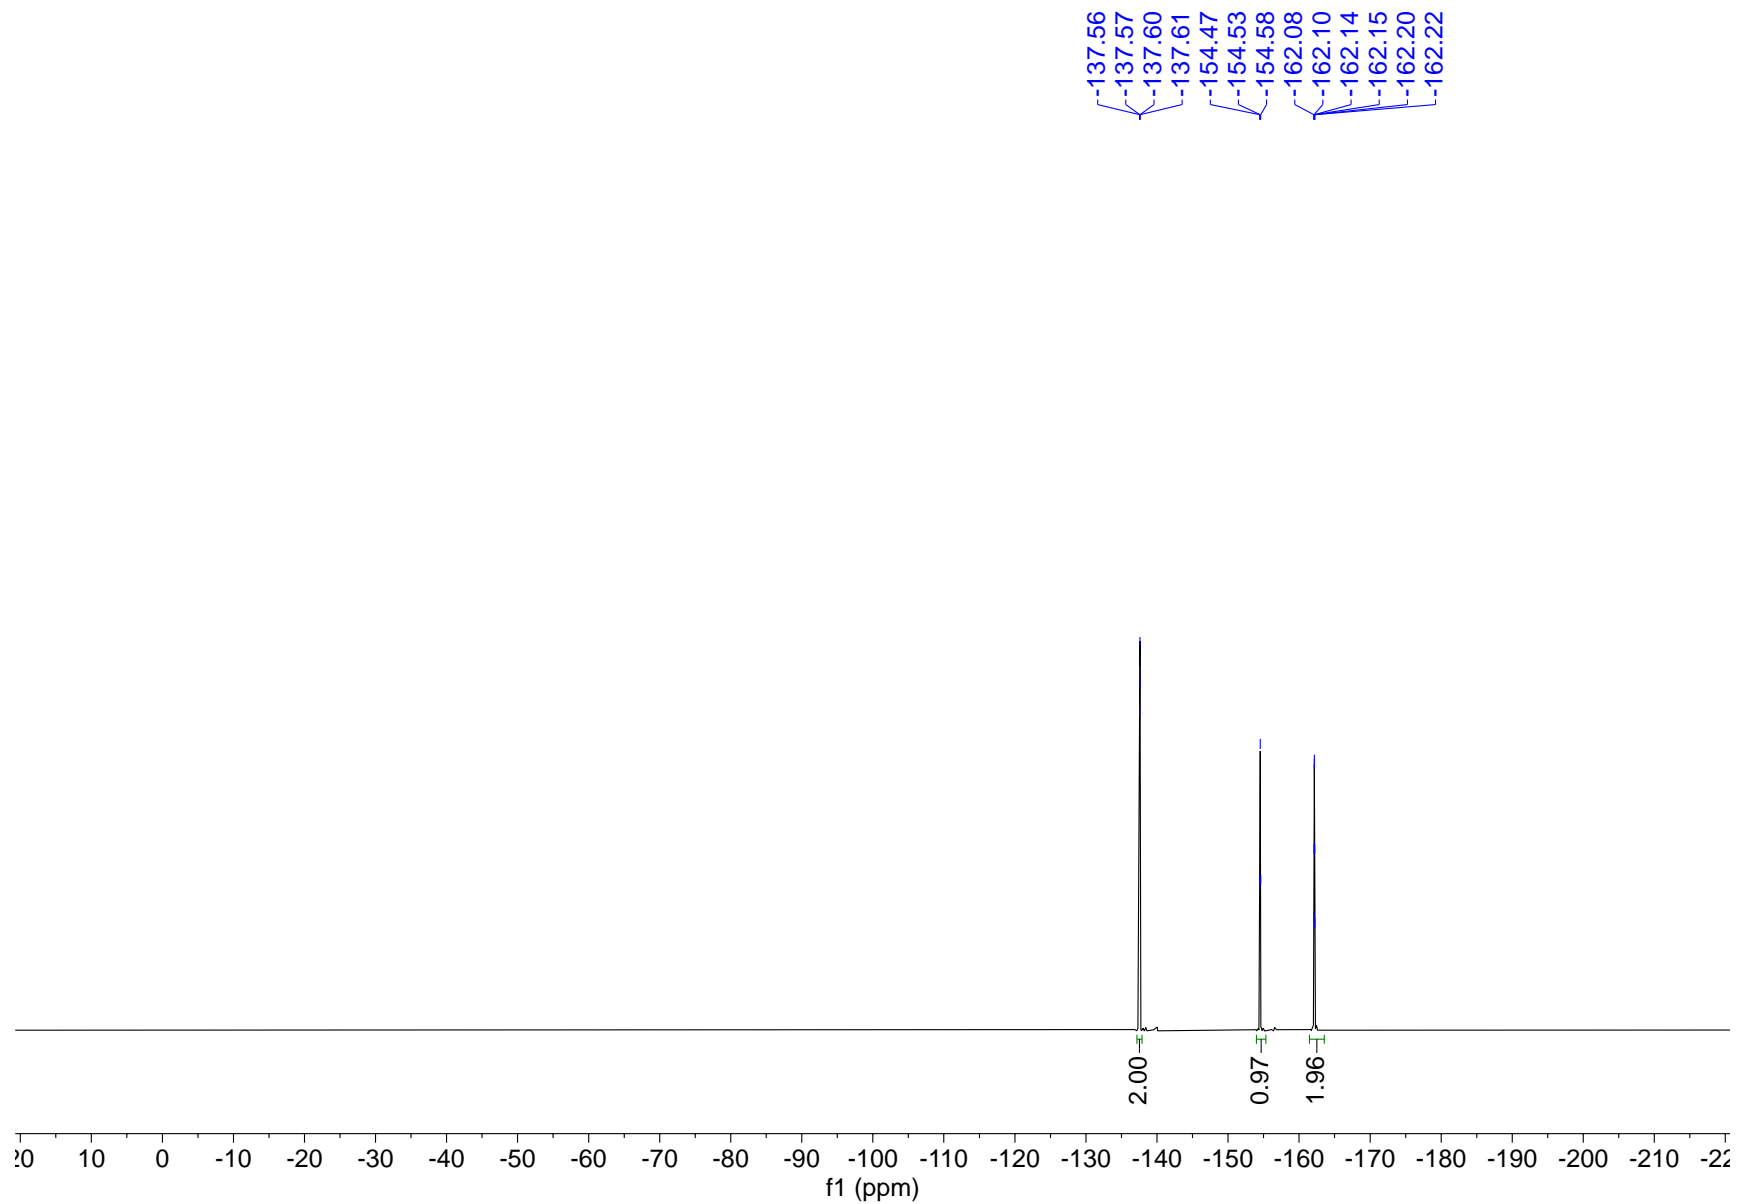

Figure S25:  $^1\text{H}$  NMR (500.2 MHz,  $\text{CDCl}_3$ , 298 K) spectrum of **2g**.

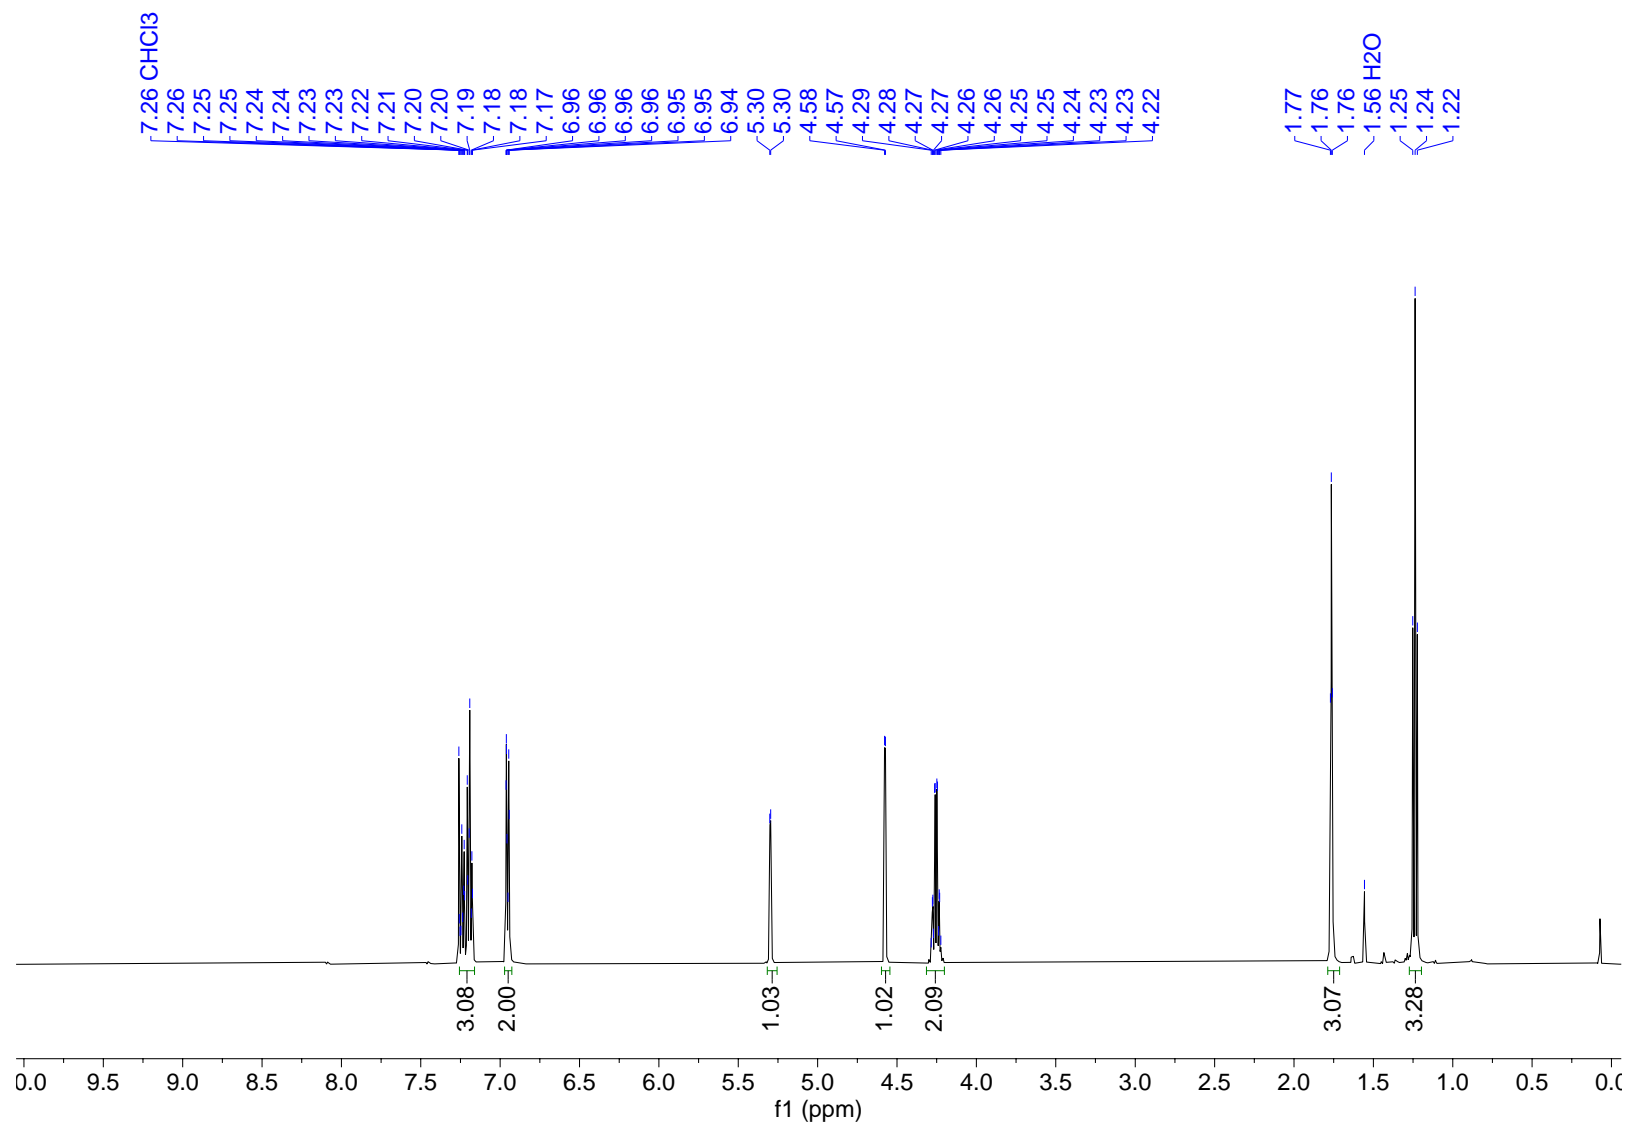

Figure S26:  $^{13}\text{C}$  NMR (125.8 MHz,  $\text{CDCl}_3$ , 298 K) spectrum of **2g**.

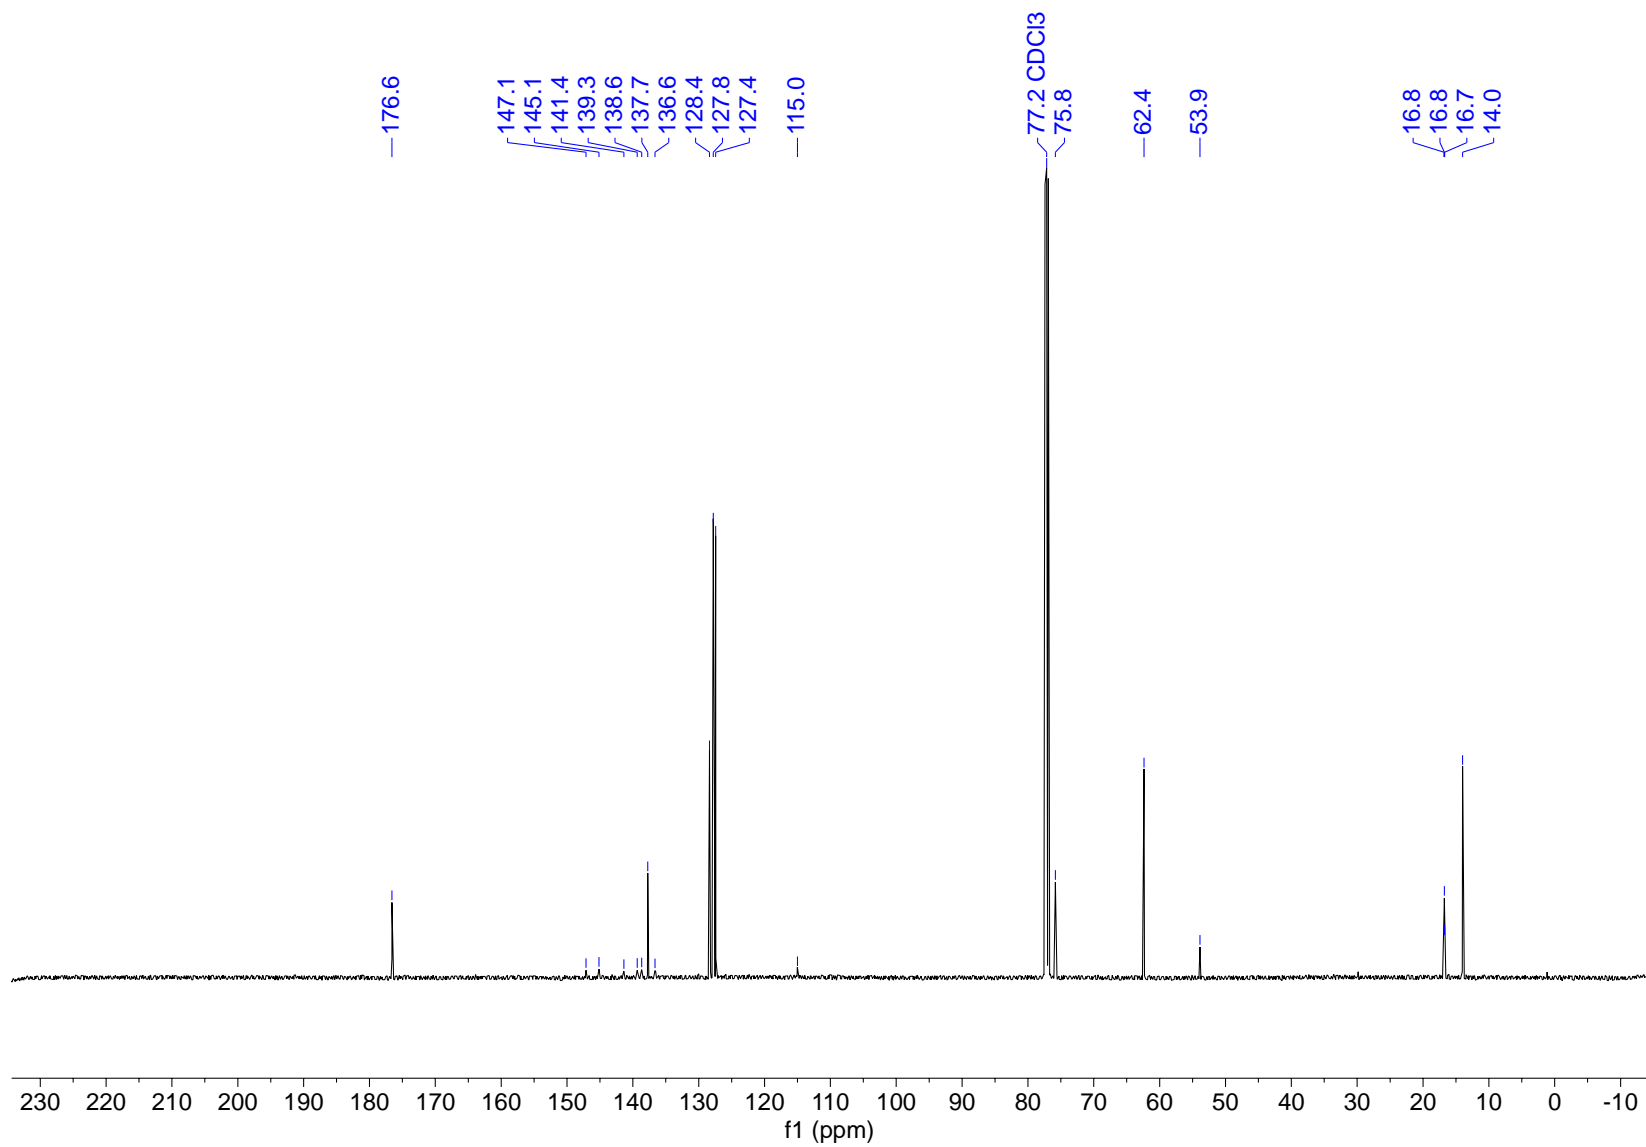

Figure S27:  $^{19}\text{F}$  NMR (376.5 MHz,  $\text{CDCl}_3$ , 298 K) spectrum of **2g**.

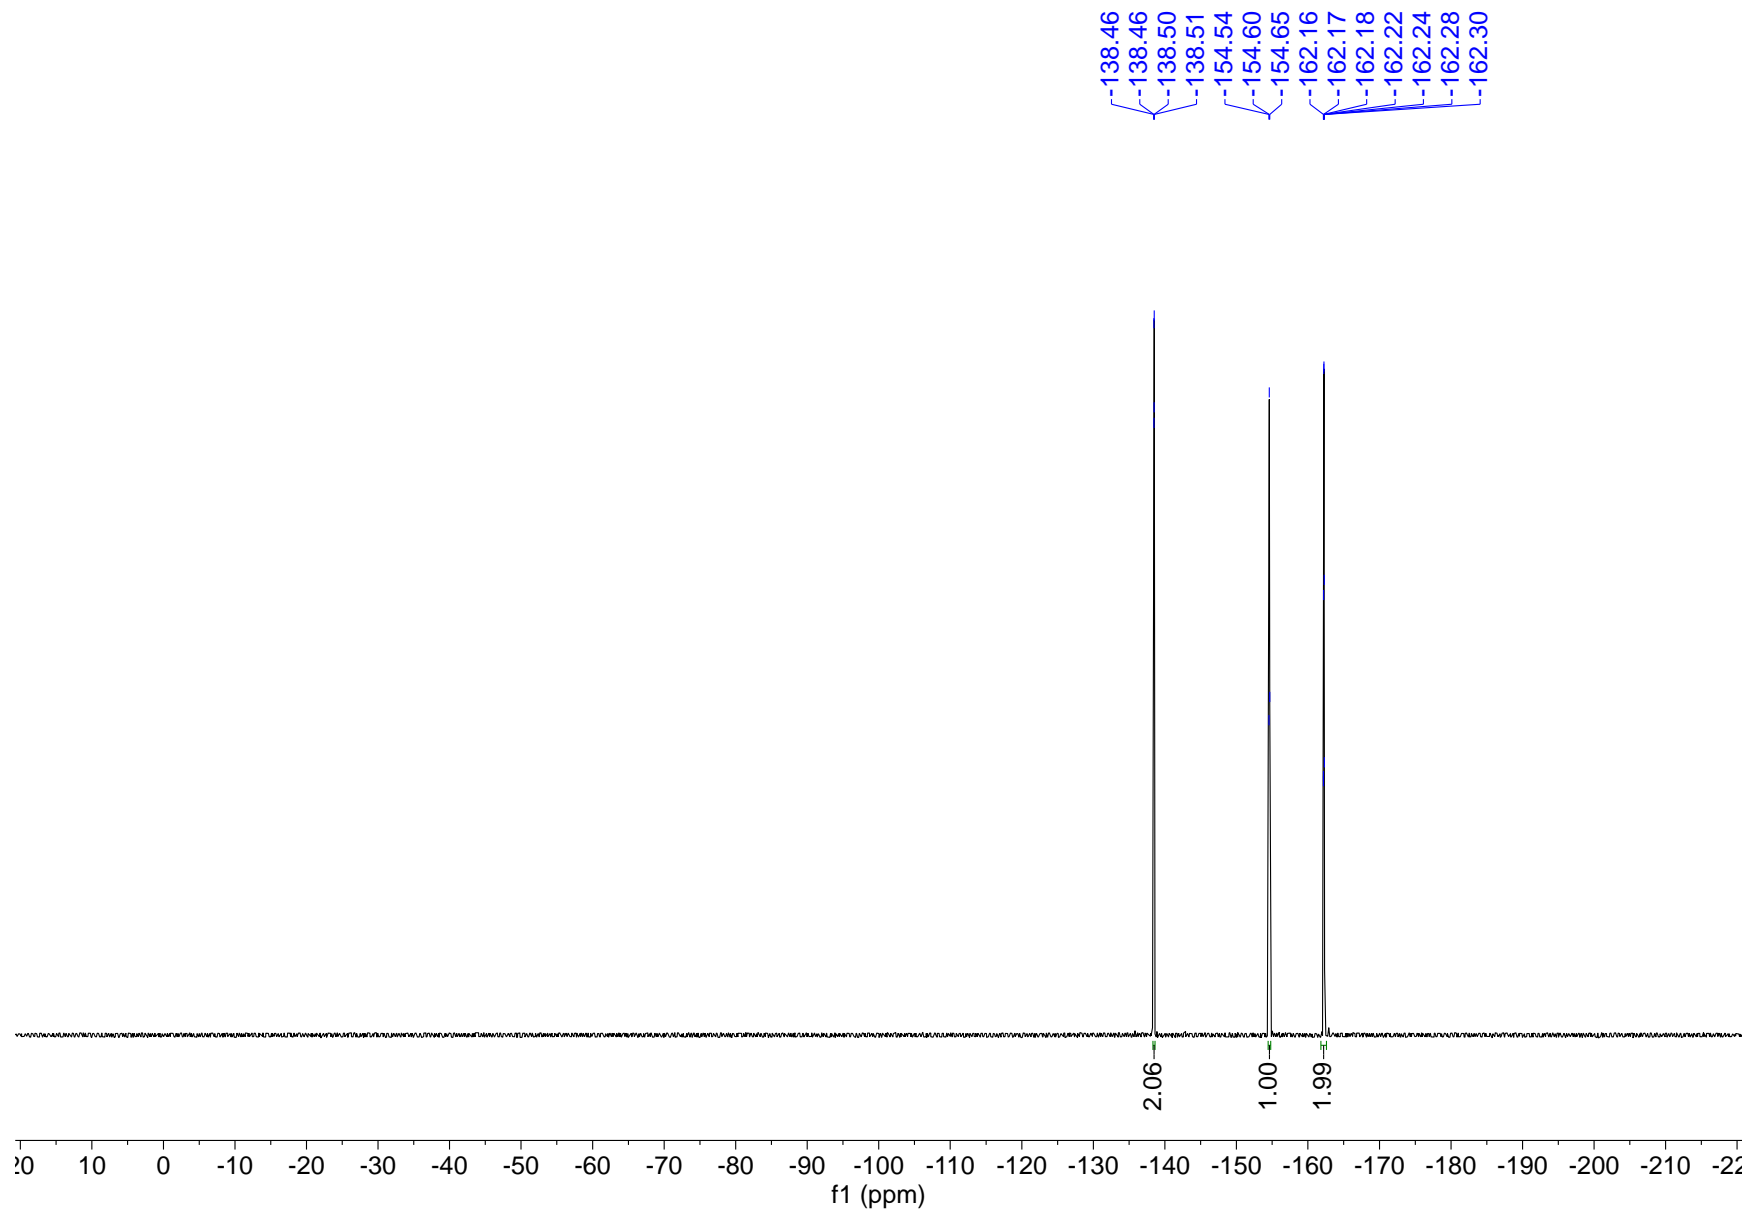

Figure S28:  $^1\text{H}$  NMR (500.2 MHz,  $\text{CDCl}_3$ , 298 K) spectrum of **2h**.

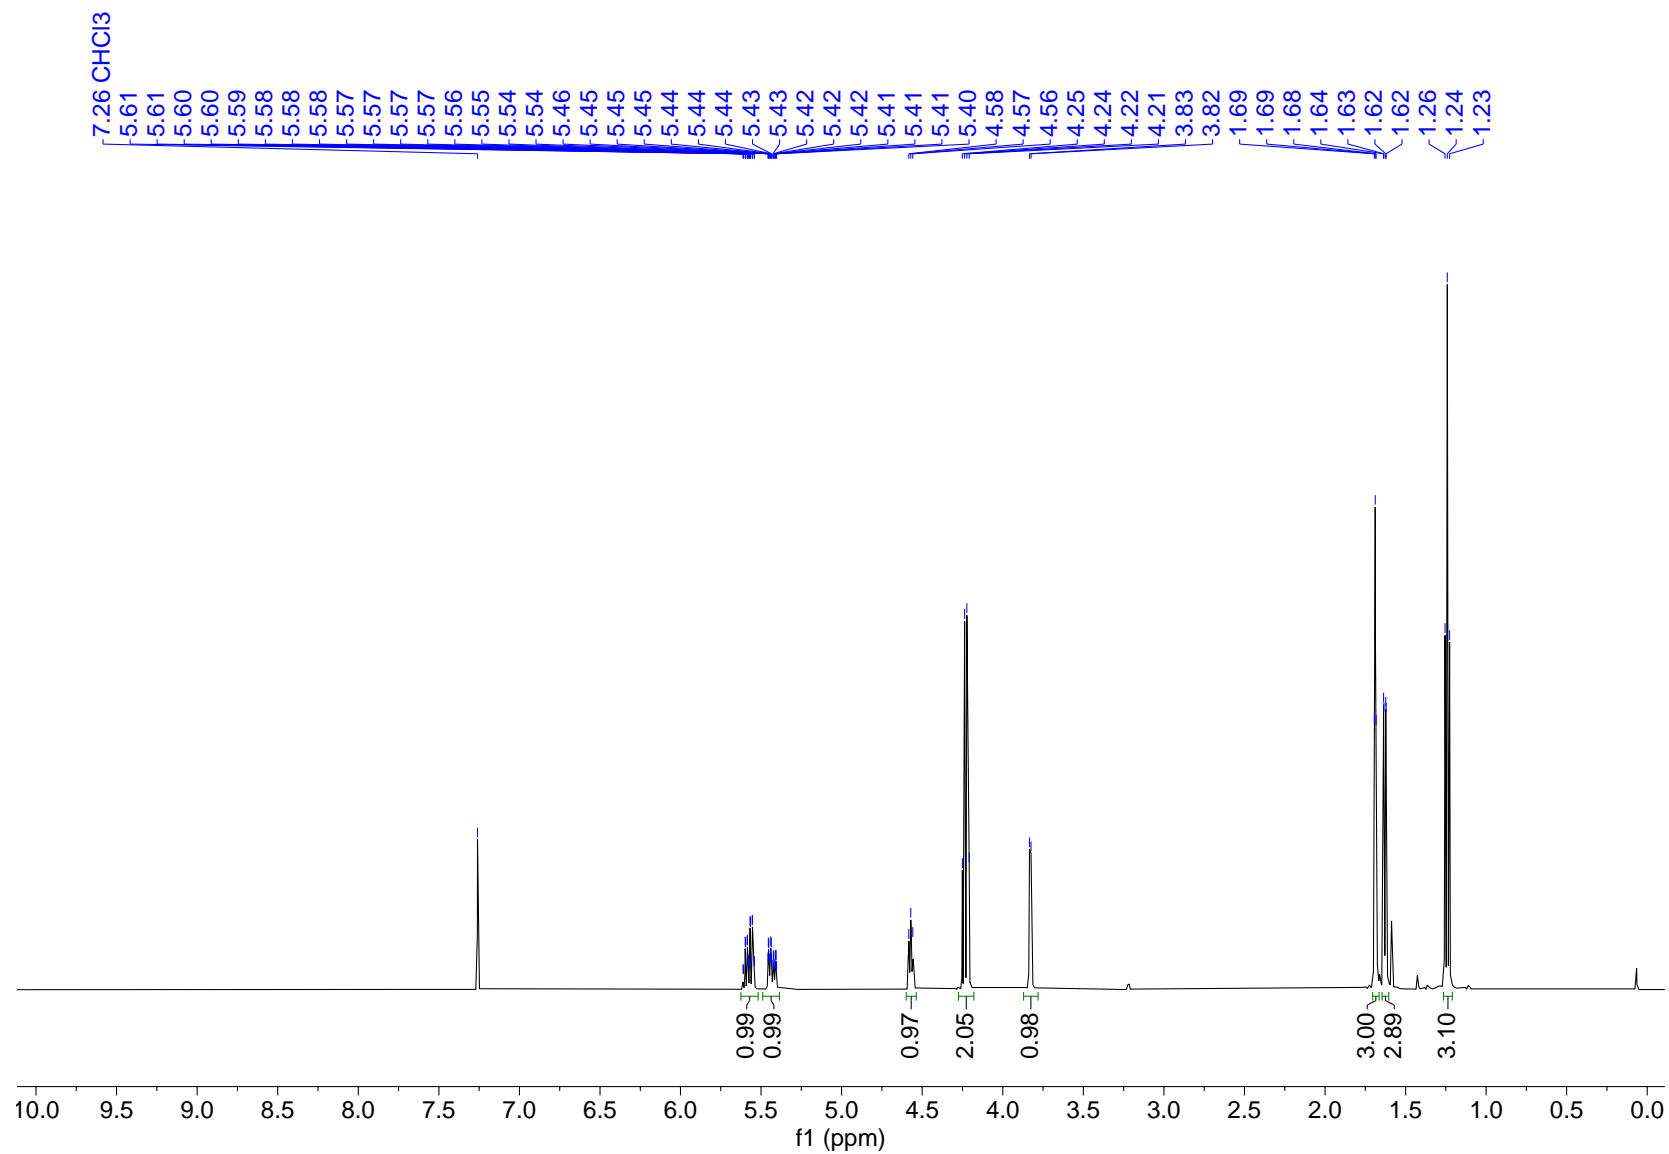

Figure S29:  $^{13}\text{C}$  NMR (125.8 MHz,  $\text{CDCl}_3$ , 298 K) spectrum of **2h**.

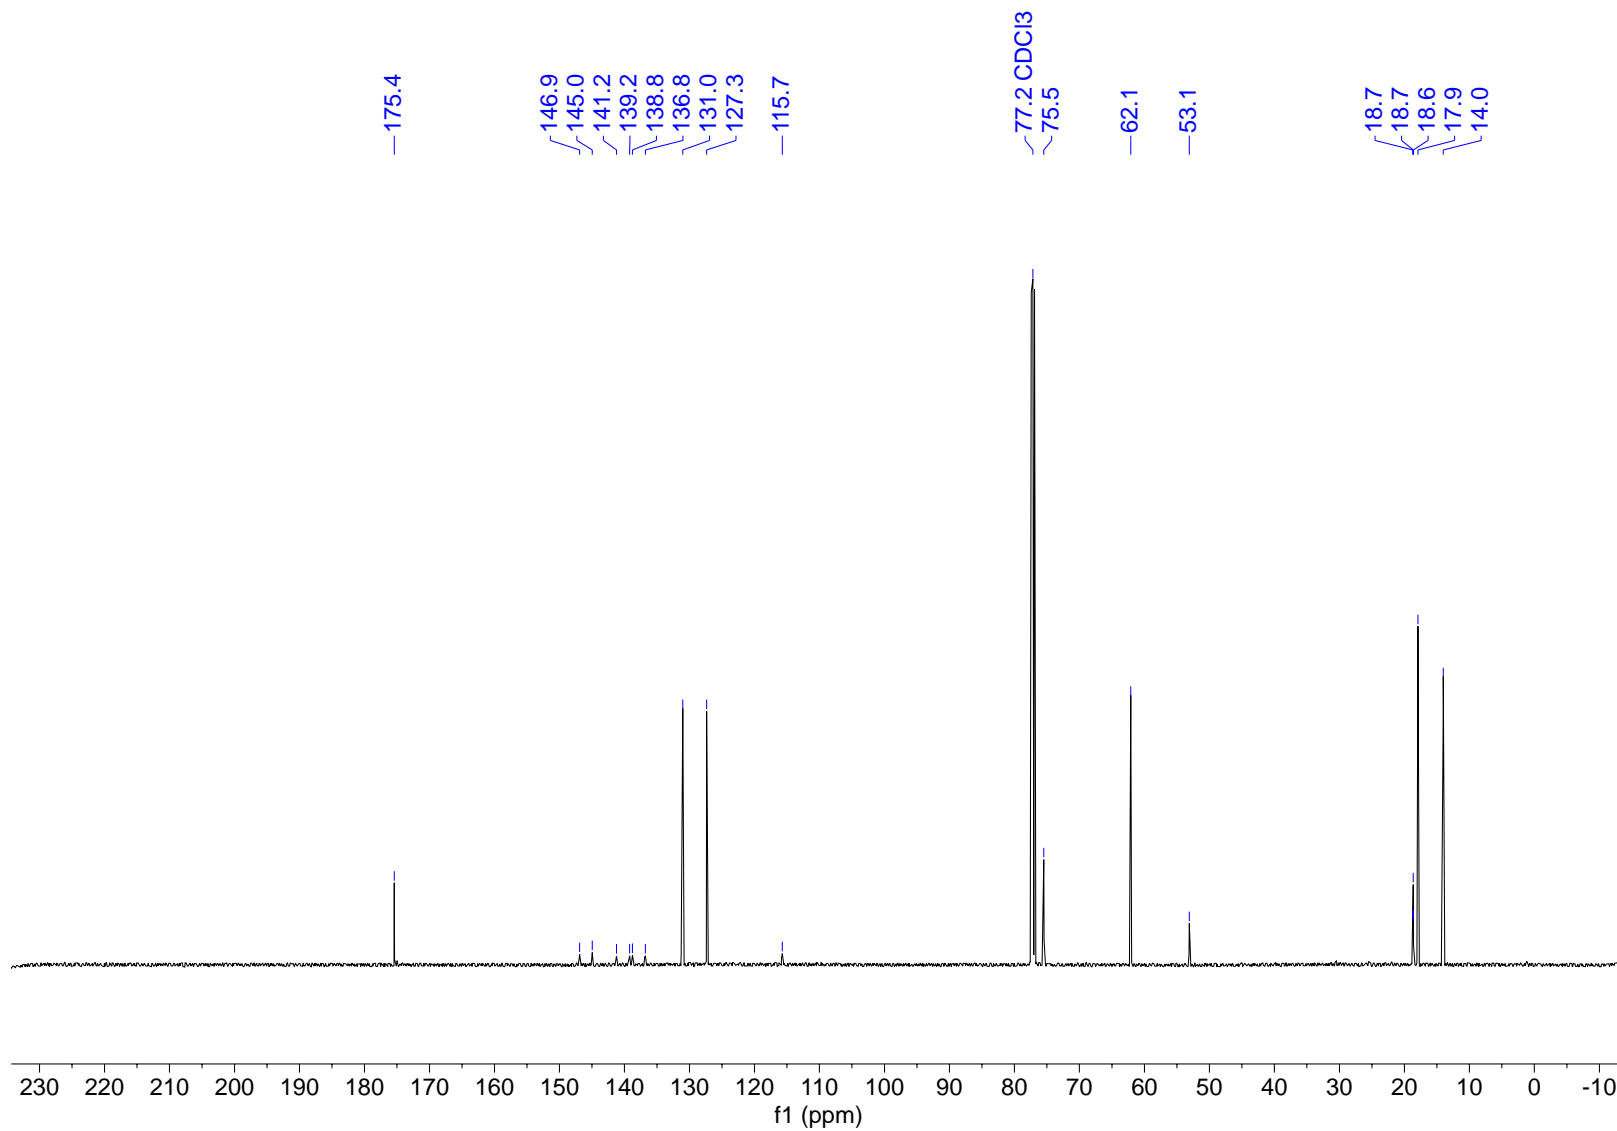

Figure S30:  $^{19}\text{F}$  NMR (470.6 MHz,  $\text{CDCl}_3$ , 298 K) spectrum of **2h**.

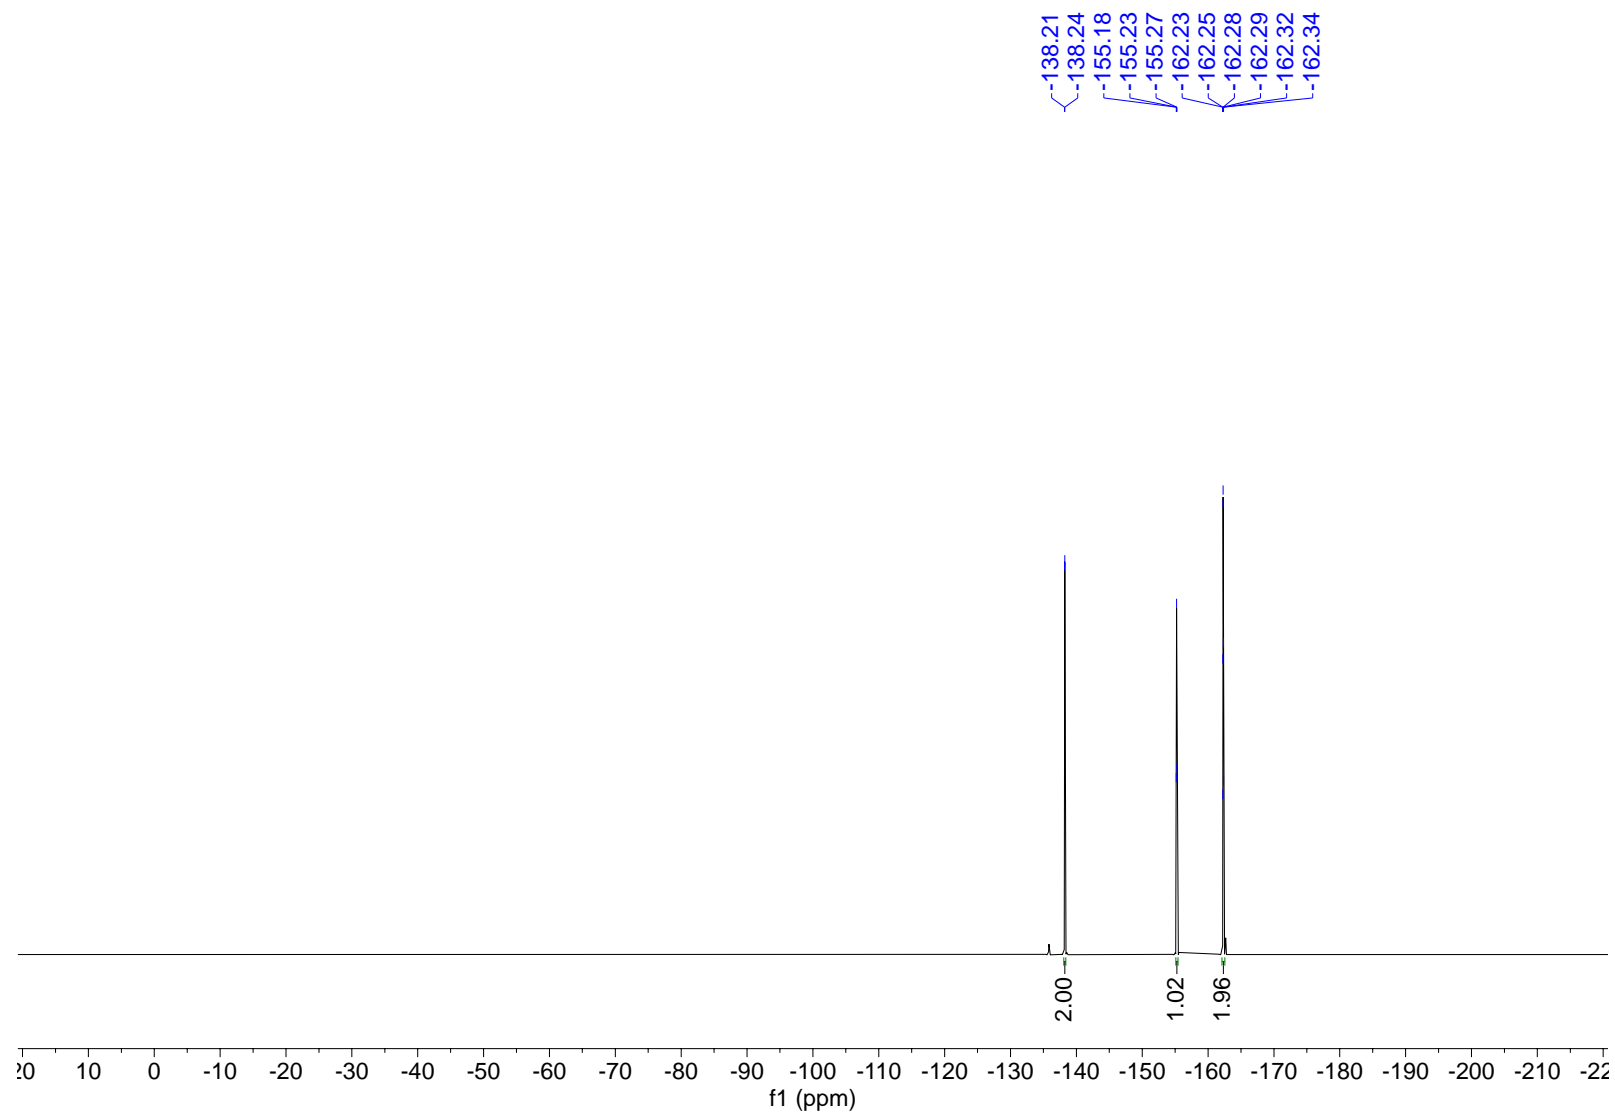



Figure S31:  $^1\text{H}$  NMR (500.2 MHz,  $\text{CDCl}_3$ , 298 K) spectrum of **2s**.

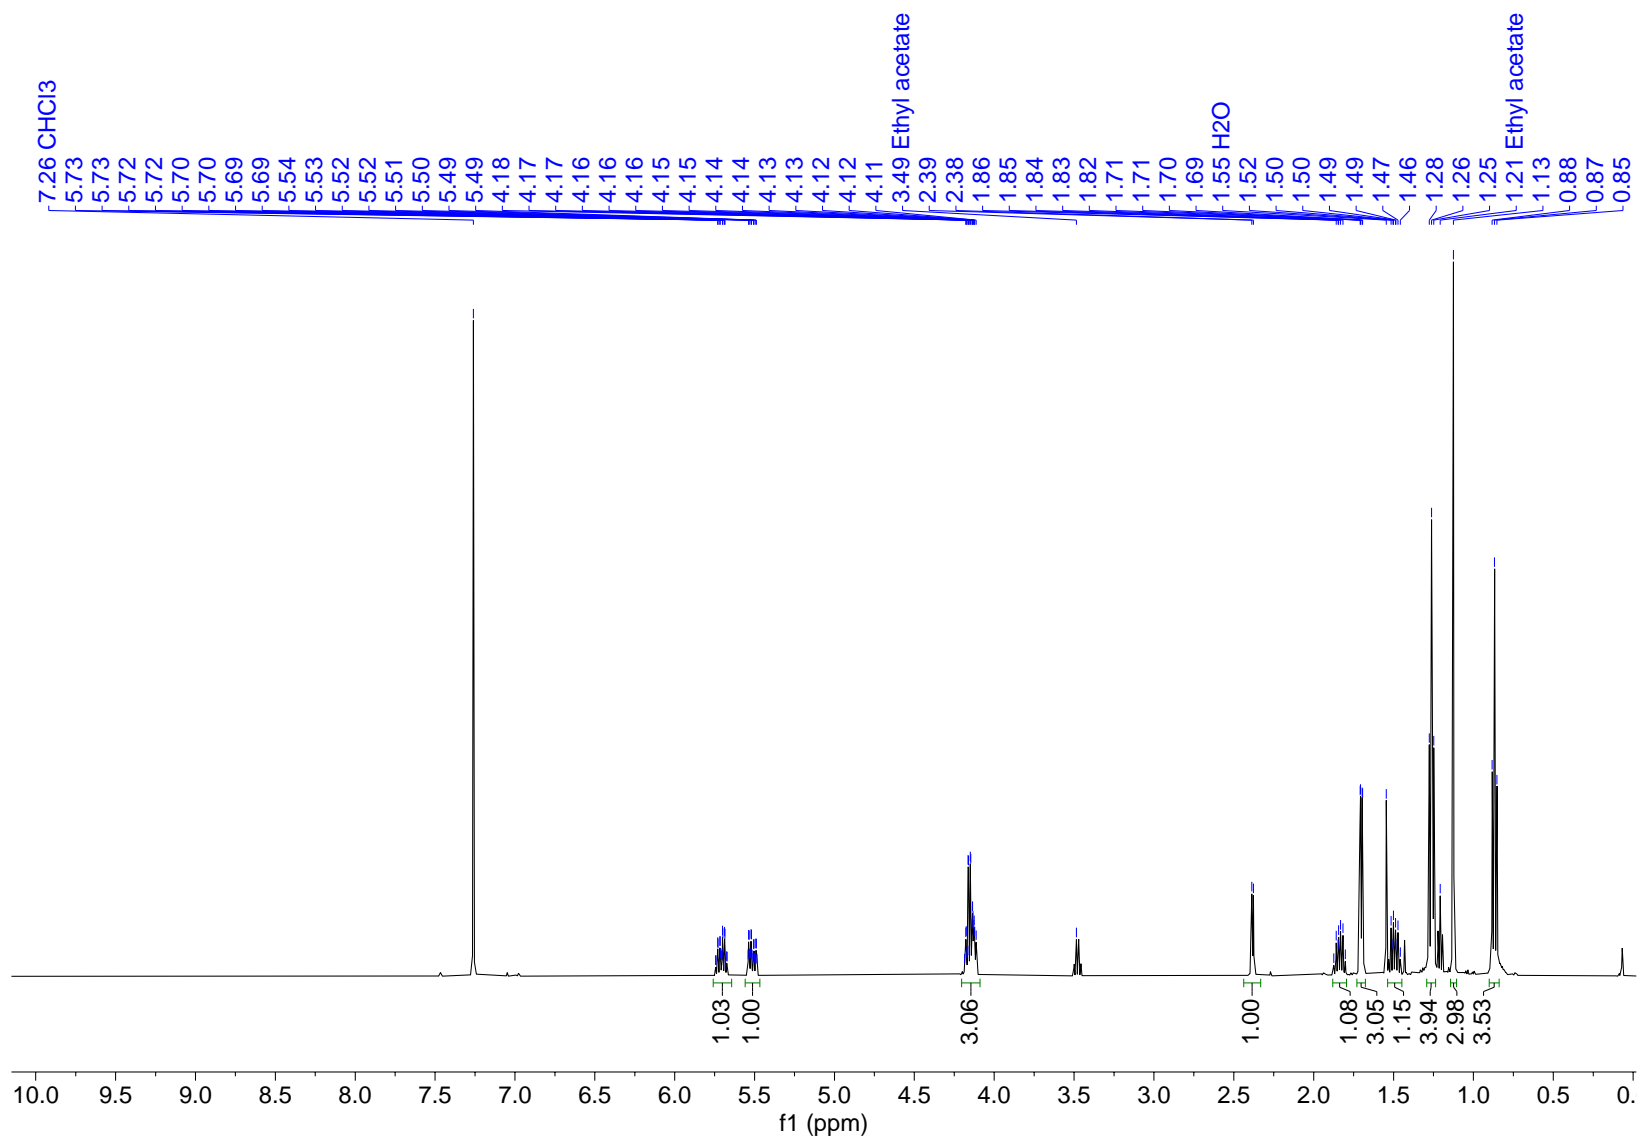

Figure S32:  $^{13}\text{C}$  NMR (125.8 MHz,  $\text{CDCl}_3$ , 298 K) spectrum of **2s**.

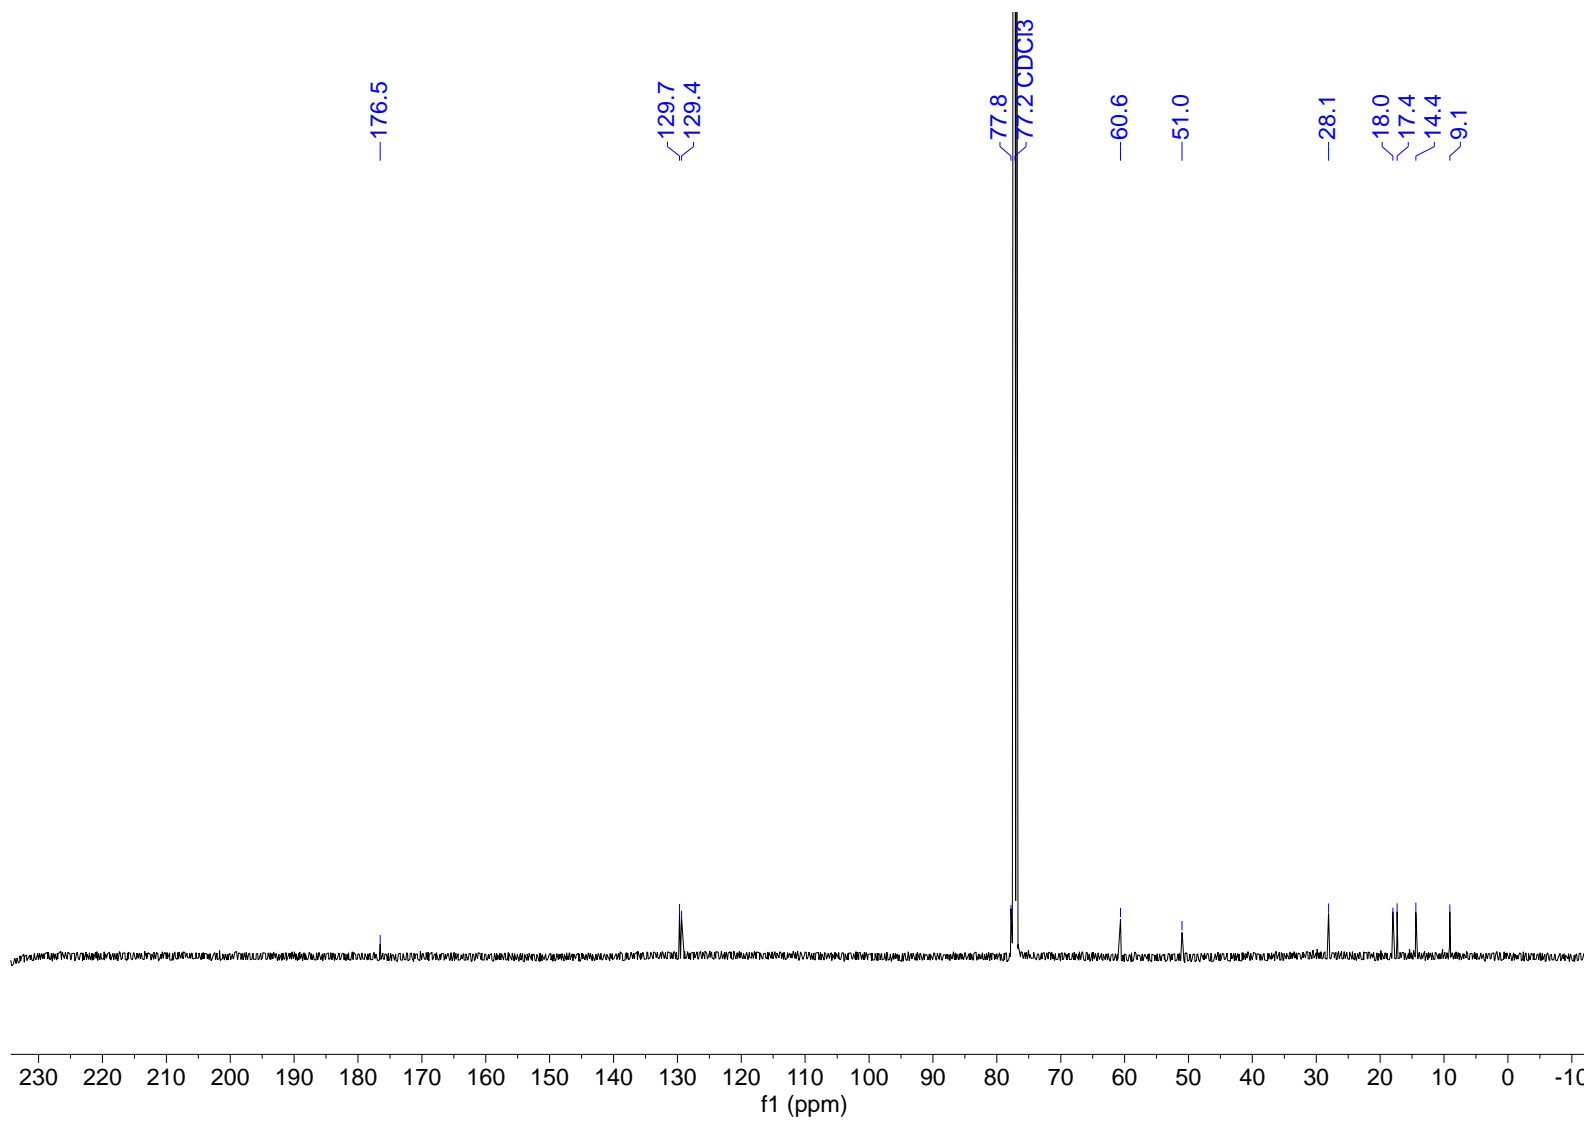

Figure S33:  $^1\text{H}$  NMR (400.1 MHz,  $\text{CDCl}_3$ , 298 K) spectrum of **2i**.

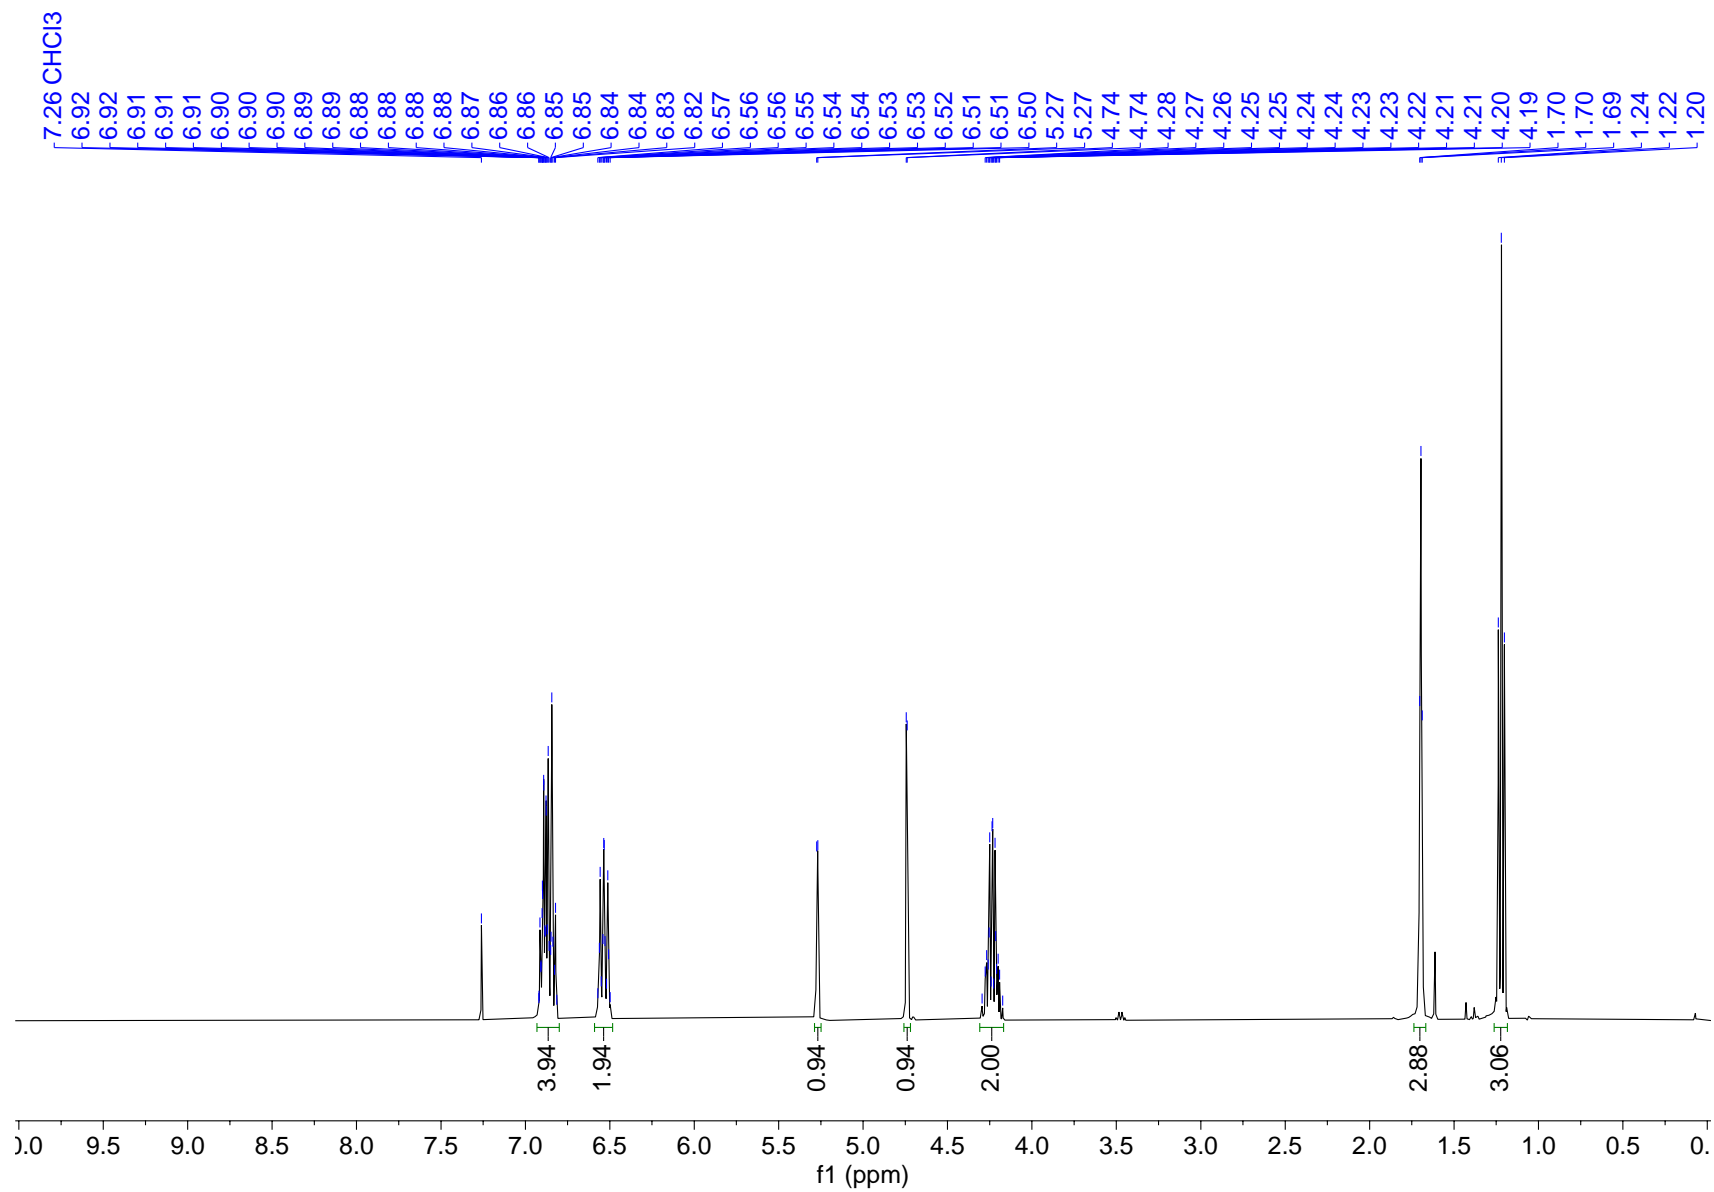

Figure S34:  $^{13}\text{C}$  NMR (125.8 MHz,  $\text{CDCl}_3$ , 298 K) spectrum of **2i**.

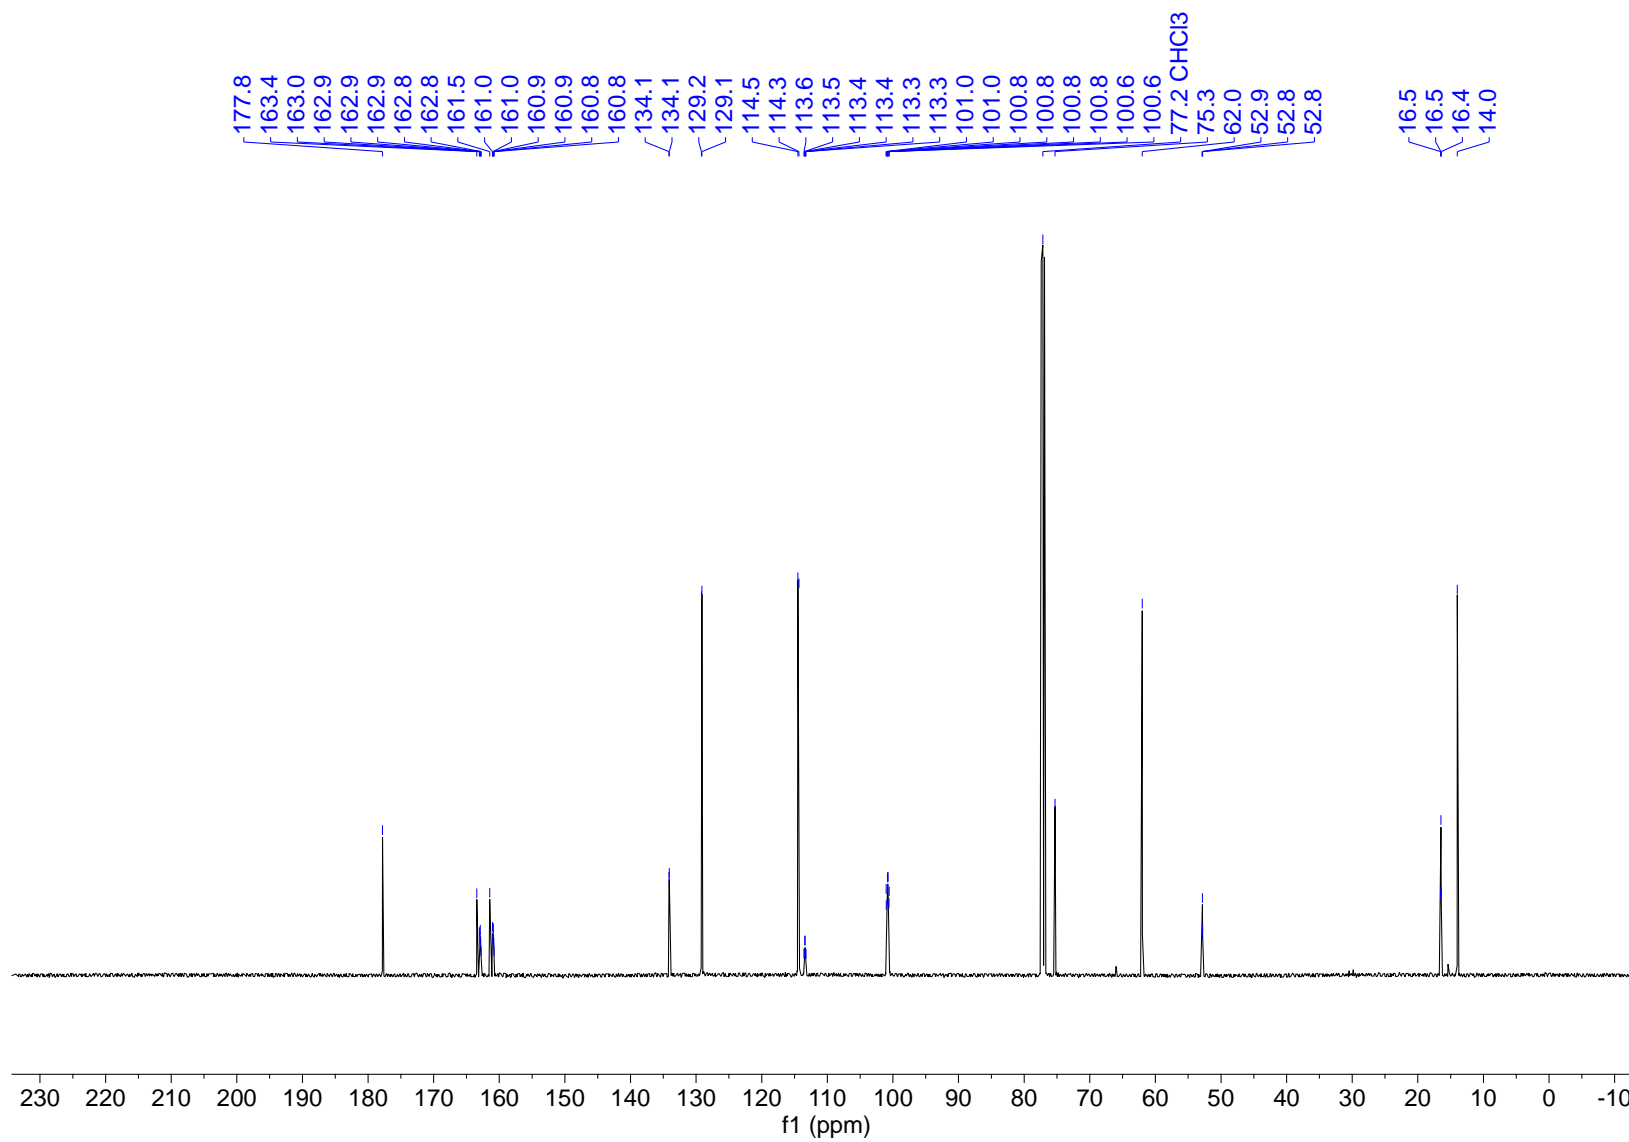

Figure S35:  $^{19}\text{F}$  NMR (376.5 MHz,  $\text{CDCl}_3$ , 298 K) spectrum of **2i**.

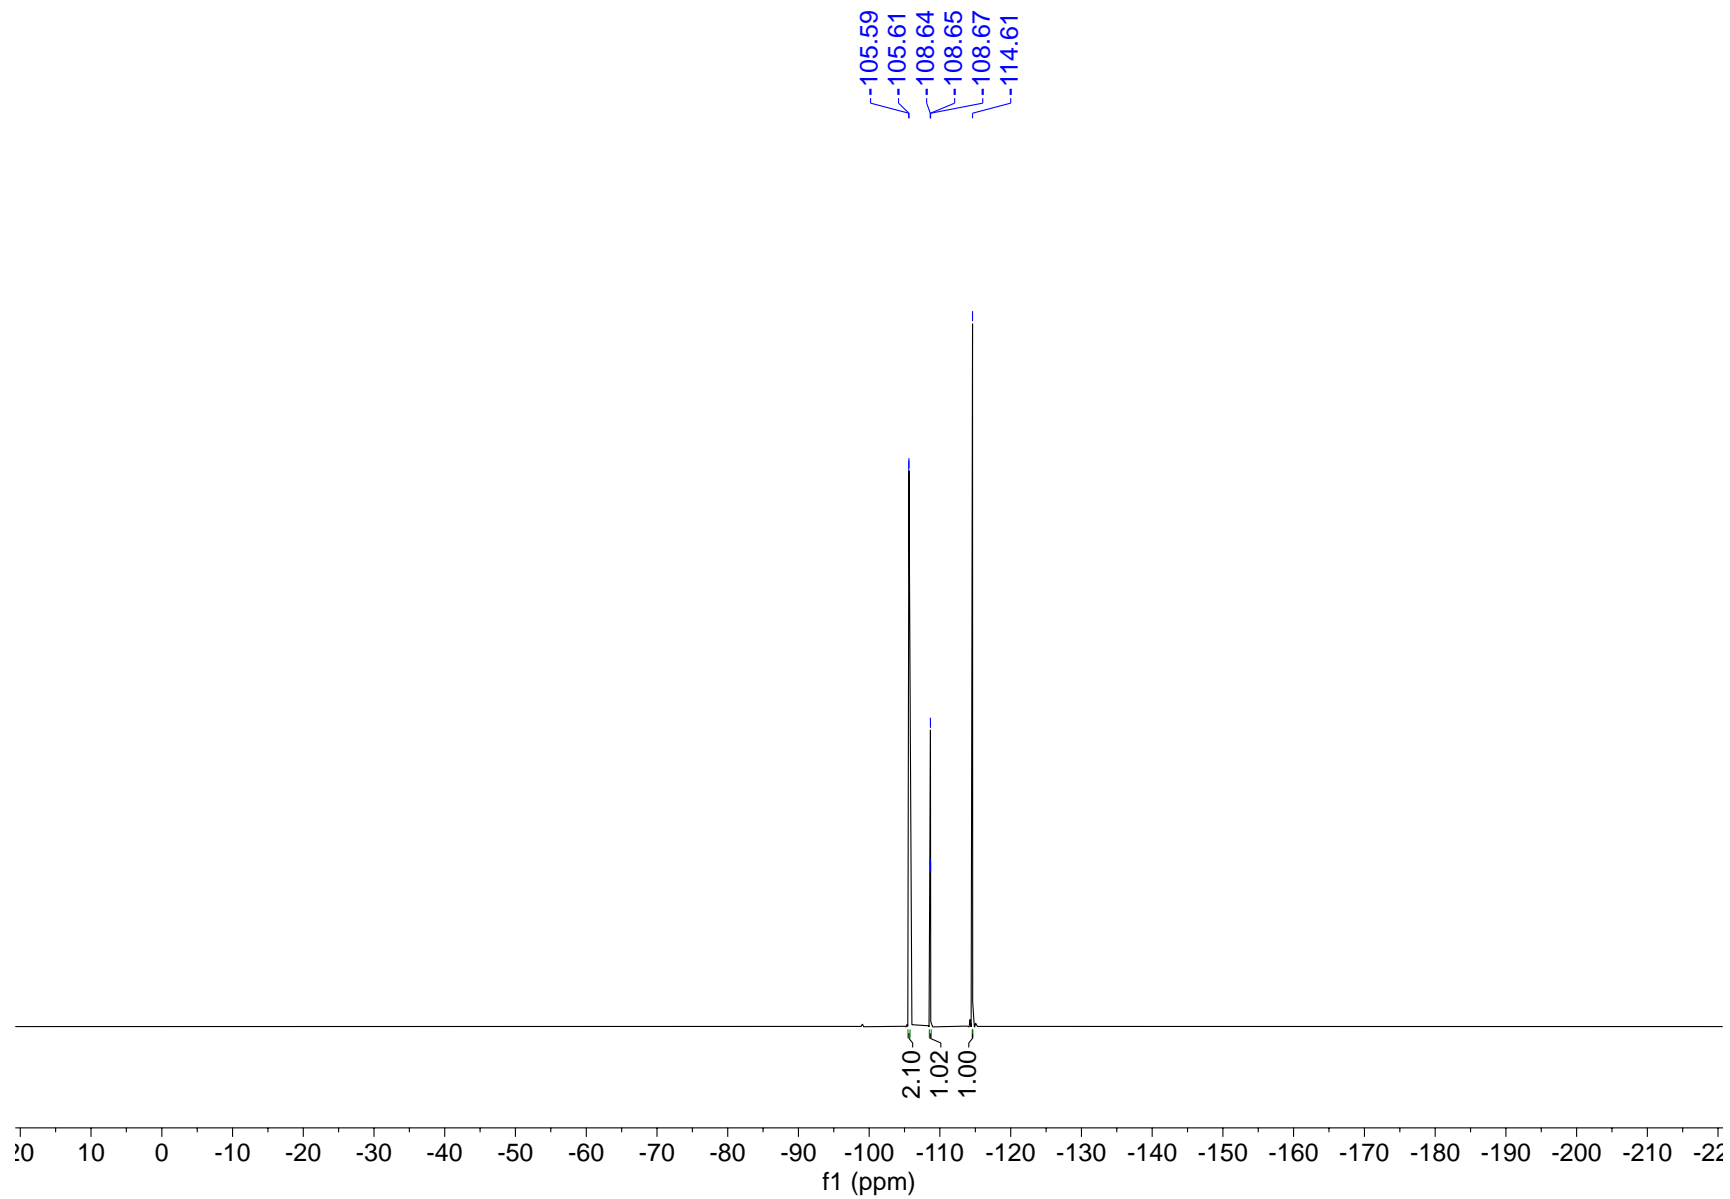

Figure S36:  $^1\text{H}$  NMR (500.2 MHz,  $\text{CDCl}_3$ , 298 K) spectrum of **2j**.

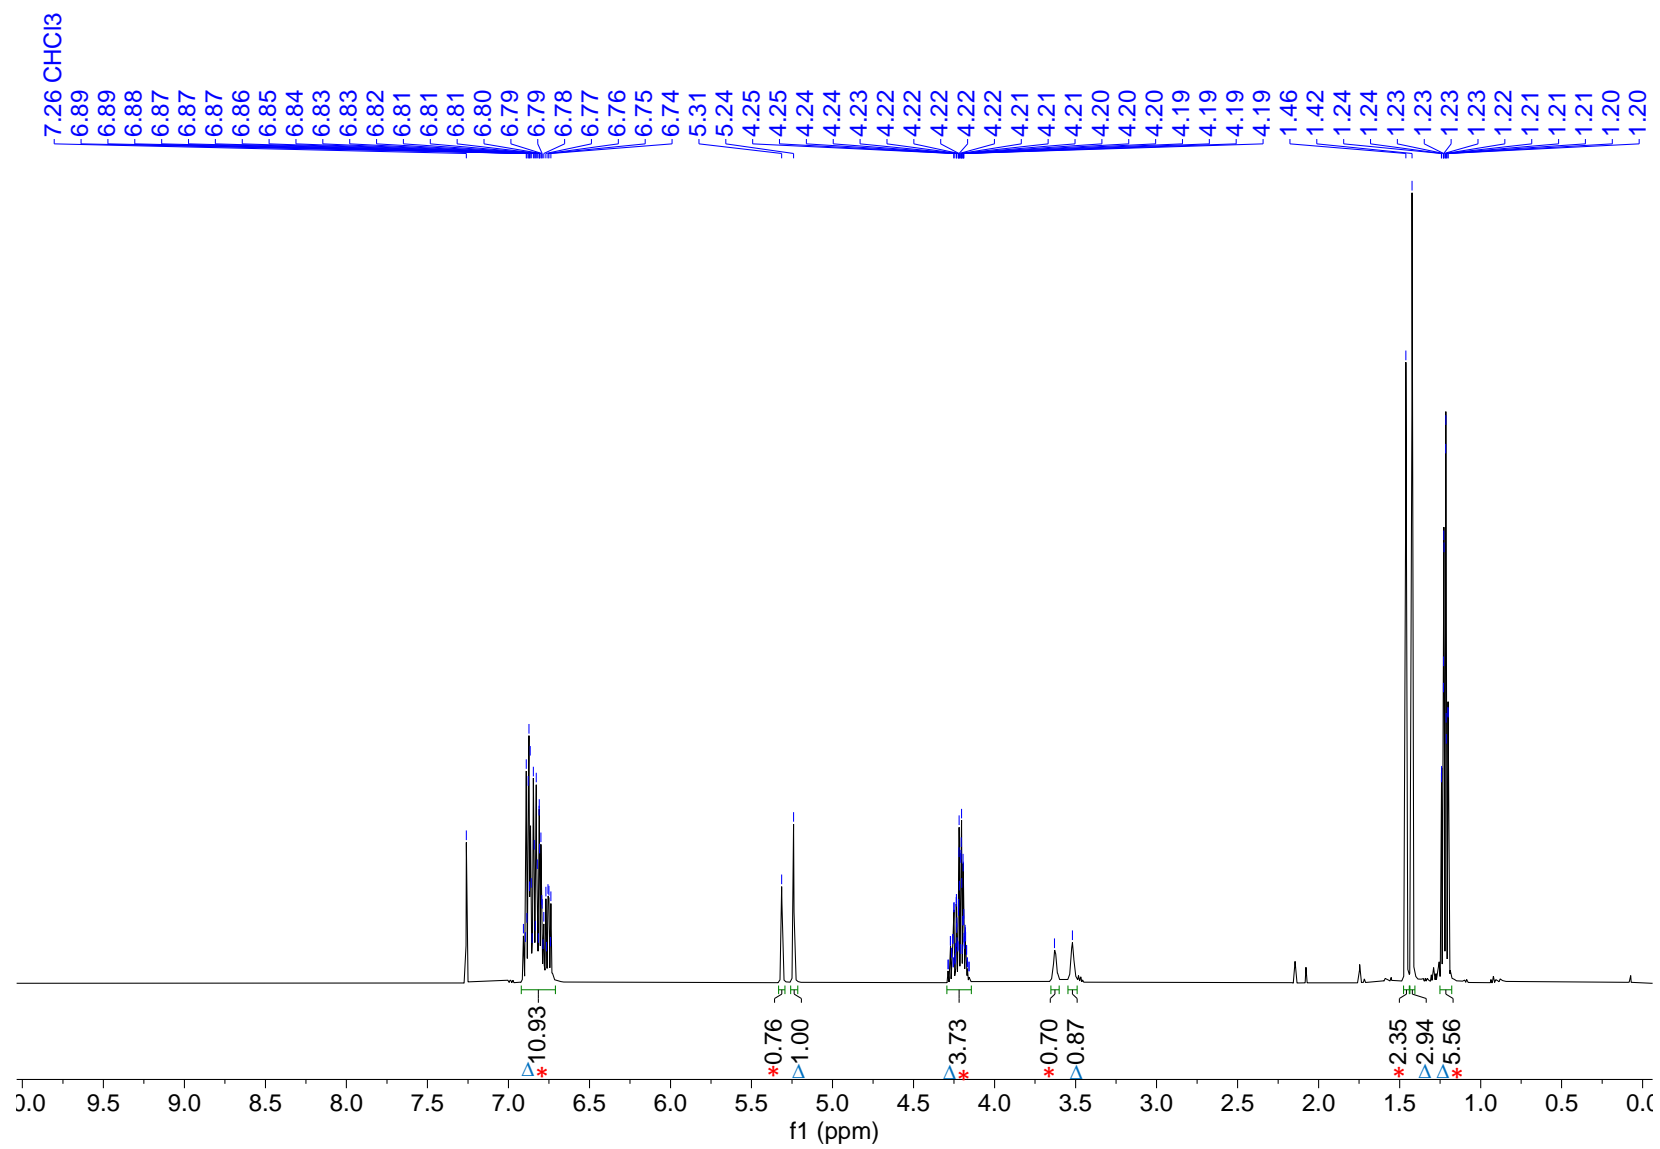

Figure S37:  $^{13}\text{C}$  NMR (125.8 MHz,  $\text{CDCl}_3$ , 298 K) spectrum of **2j**.

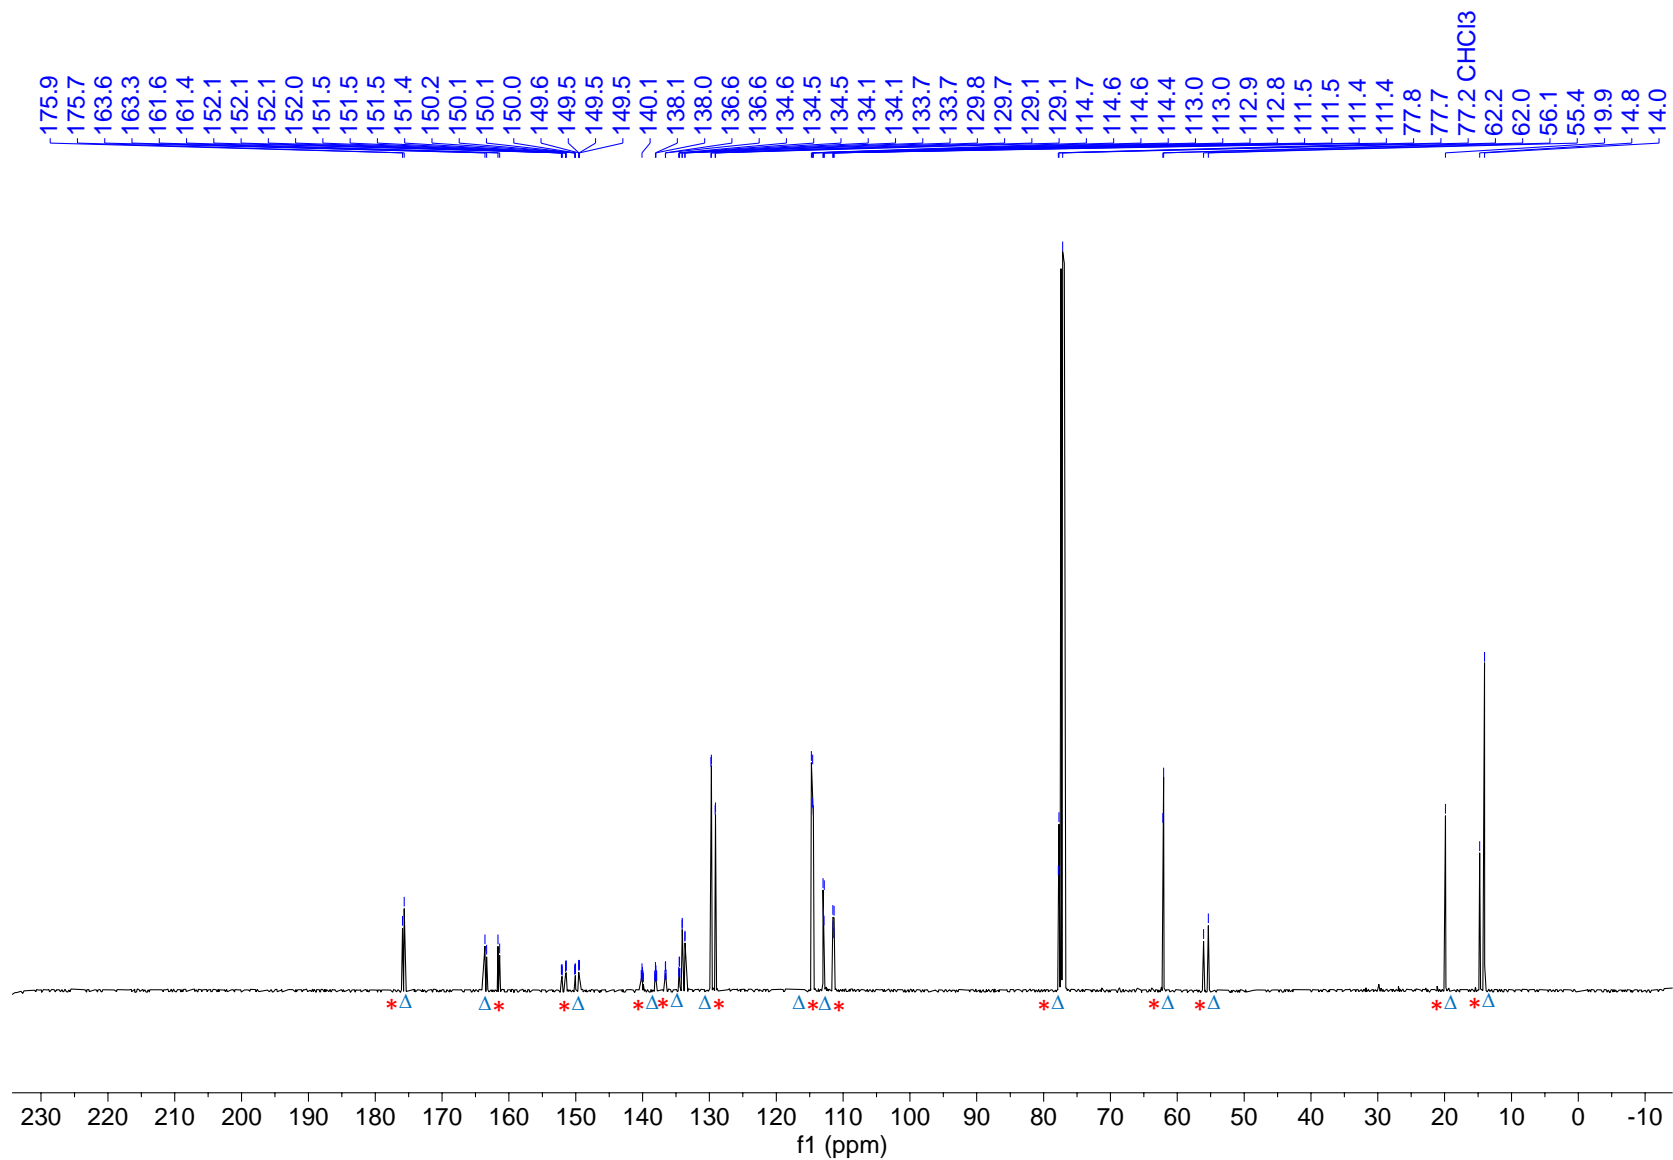

Figure S38:  $^{19}\text{F}$  NMR (470.6 MHz,  $\text{CDCl}_3$ , 298 K) spectrum of **2j**.

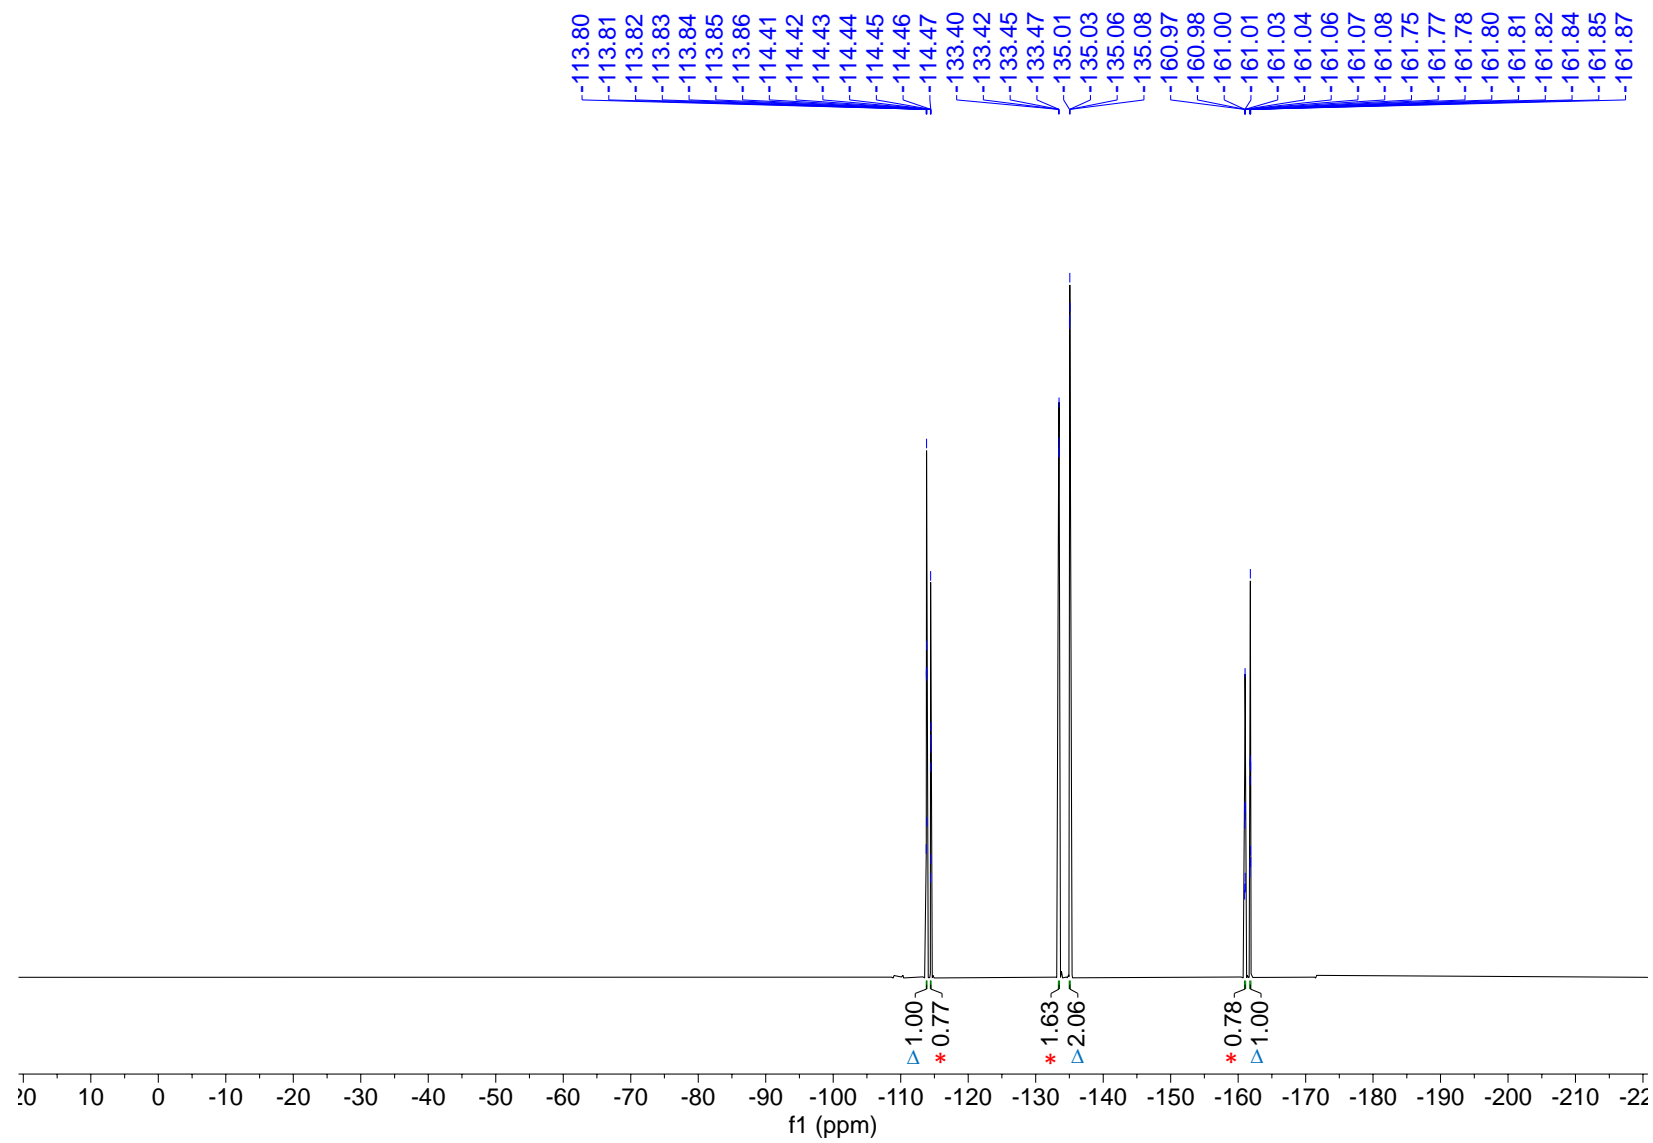



Figure S39:  $^1\text{H}$  NMR (400.1 MHz,  $\text{CDCl}_3$ , 298 K) spectrum of **2k**.

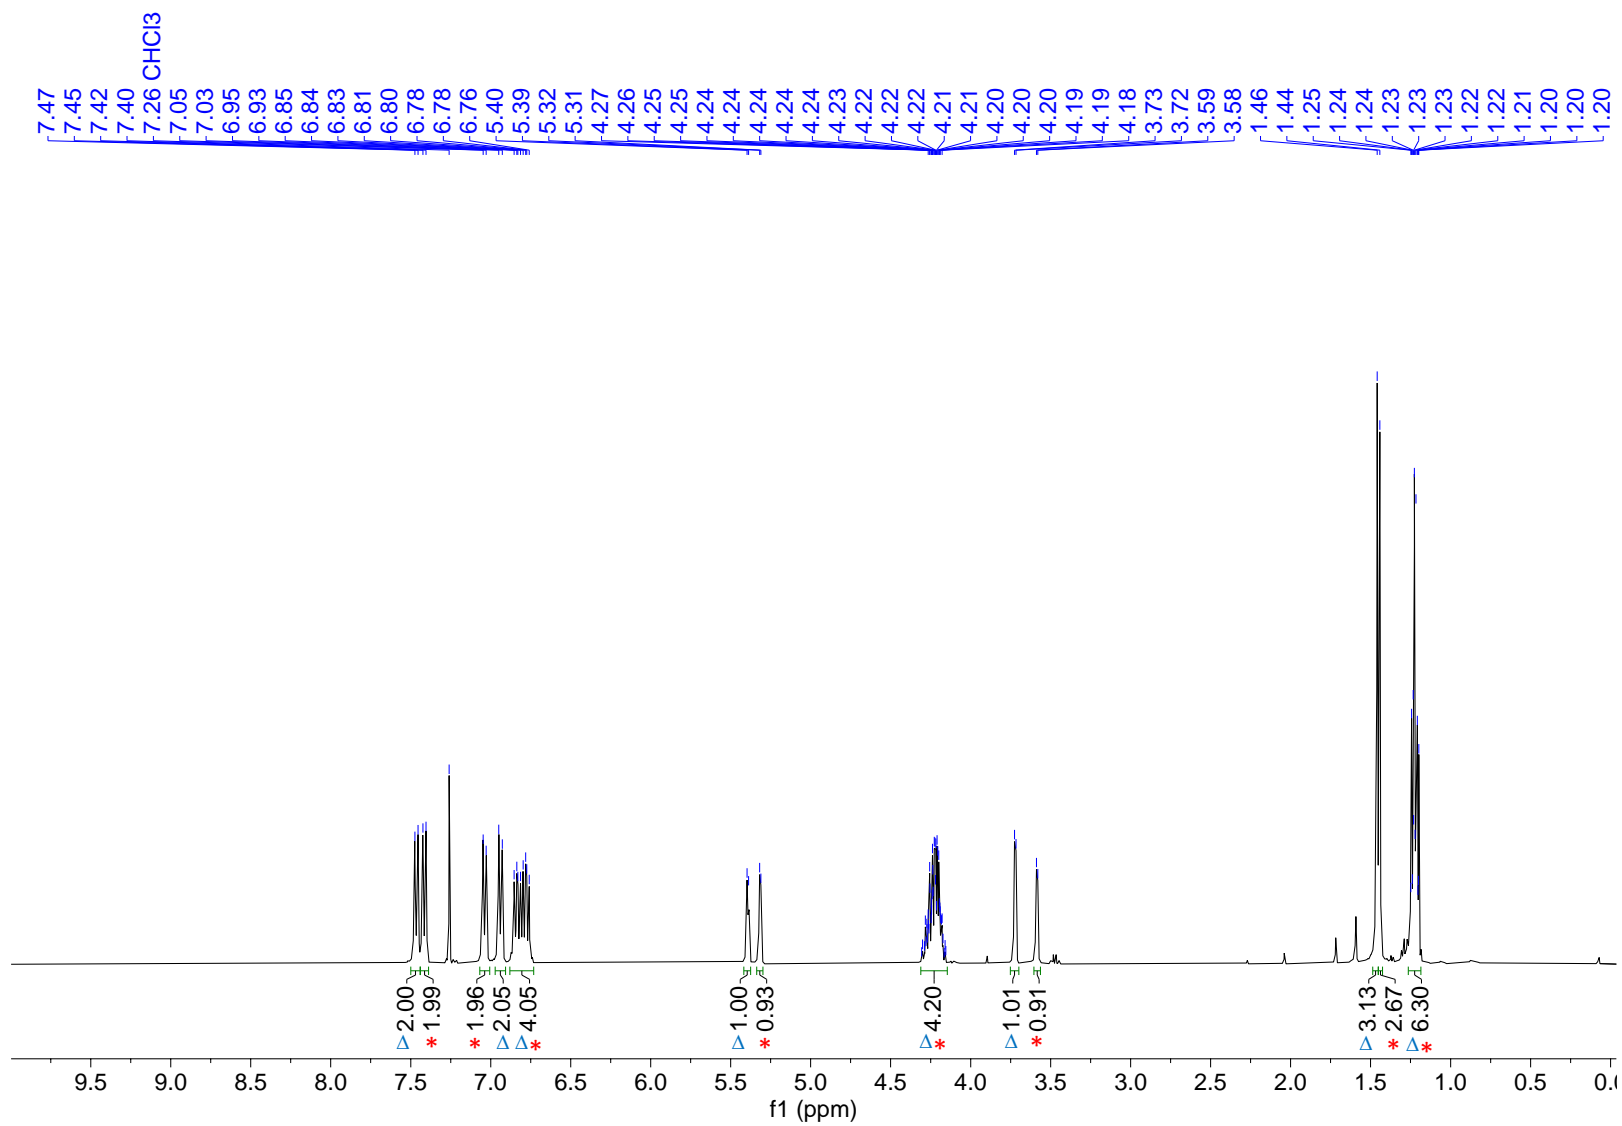

Figure S40:  $^{13}\text{C}$  NMR (101 MHz,  $\text{CDCl}_3$ , 298 K) spectrum of **2k**.

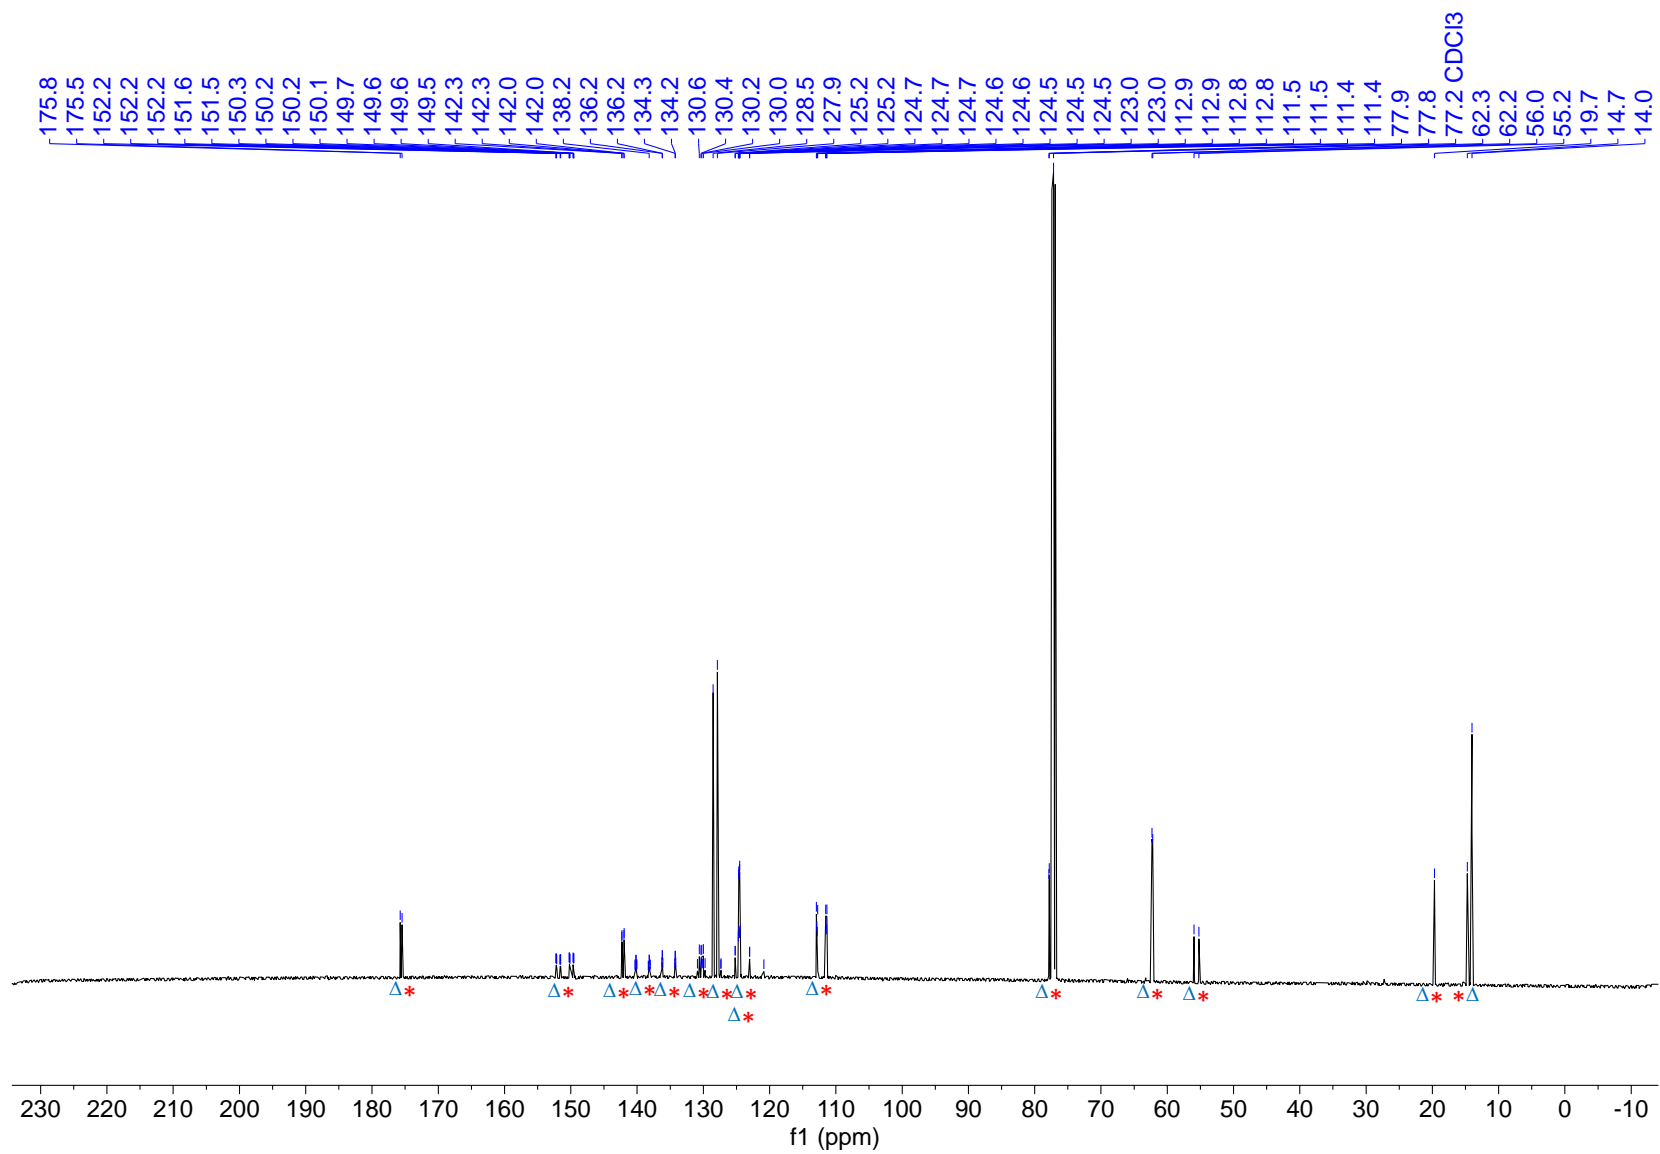

Figure S41:  $^{19}\text{F}$  NMR (376.5 MHz,  $\text{CDCl}_3$ , 298 K) spectrum of **2k**.

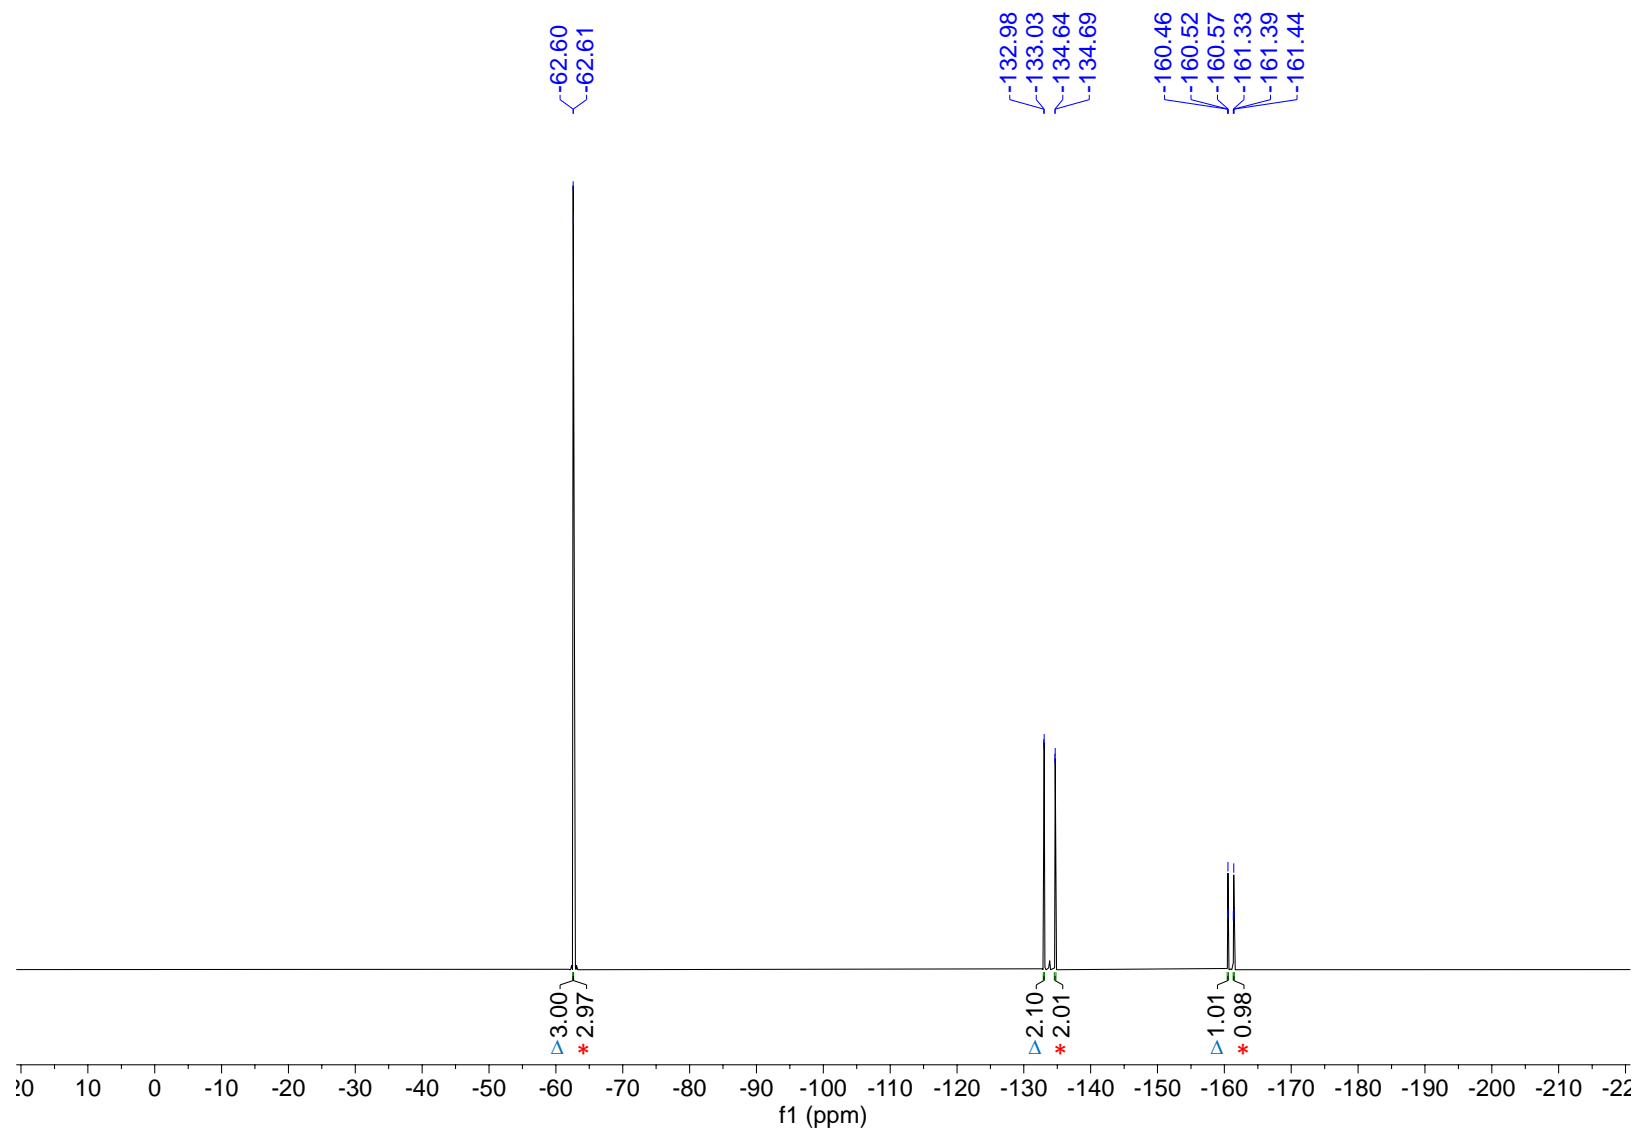

Figure S42:  $^1\text{H}$  NMR (500.2 MHz,  $\text{CDCl}_3$ , 298 K) spectrum of **2l**.

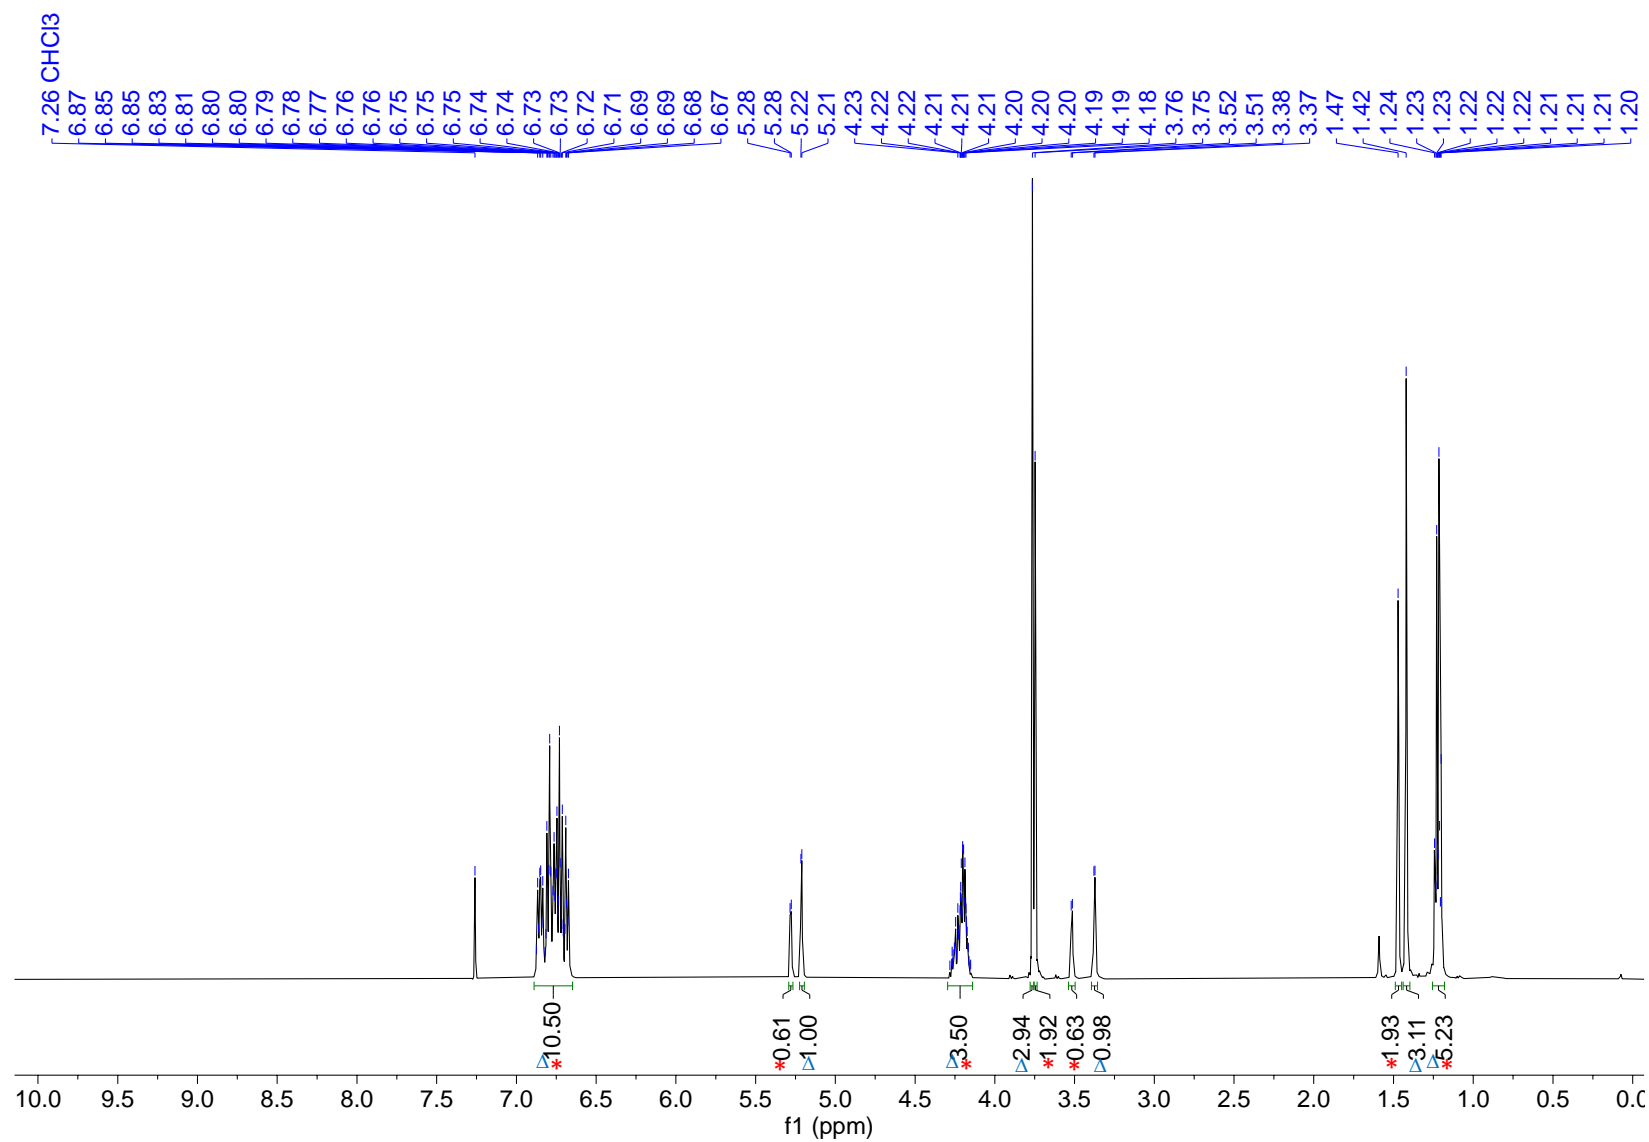

Figure S43:  $^{13}\text{C}$  NMR (125.8 MHz,  $\text{CDCl}_3$ , 298 K) spectrum of **2l**.

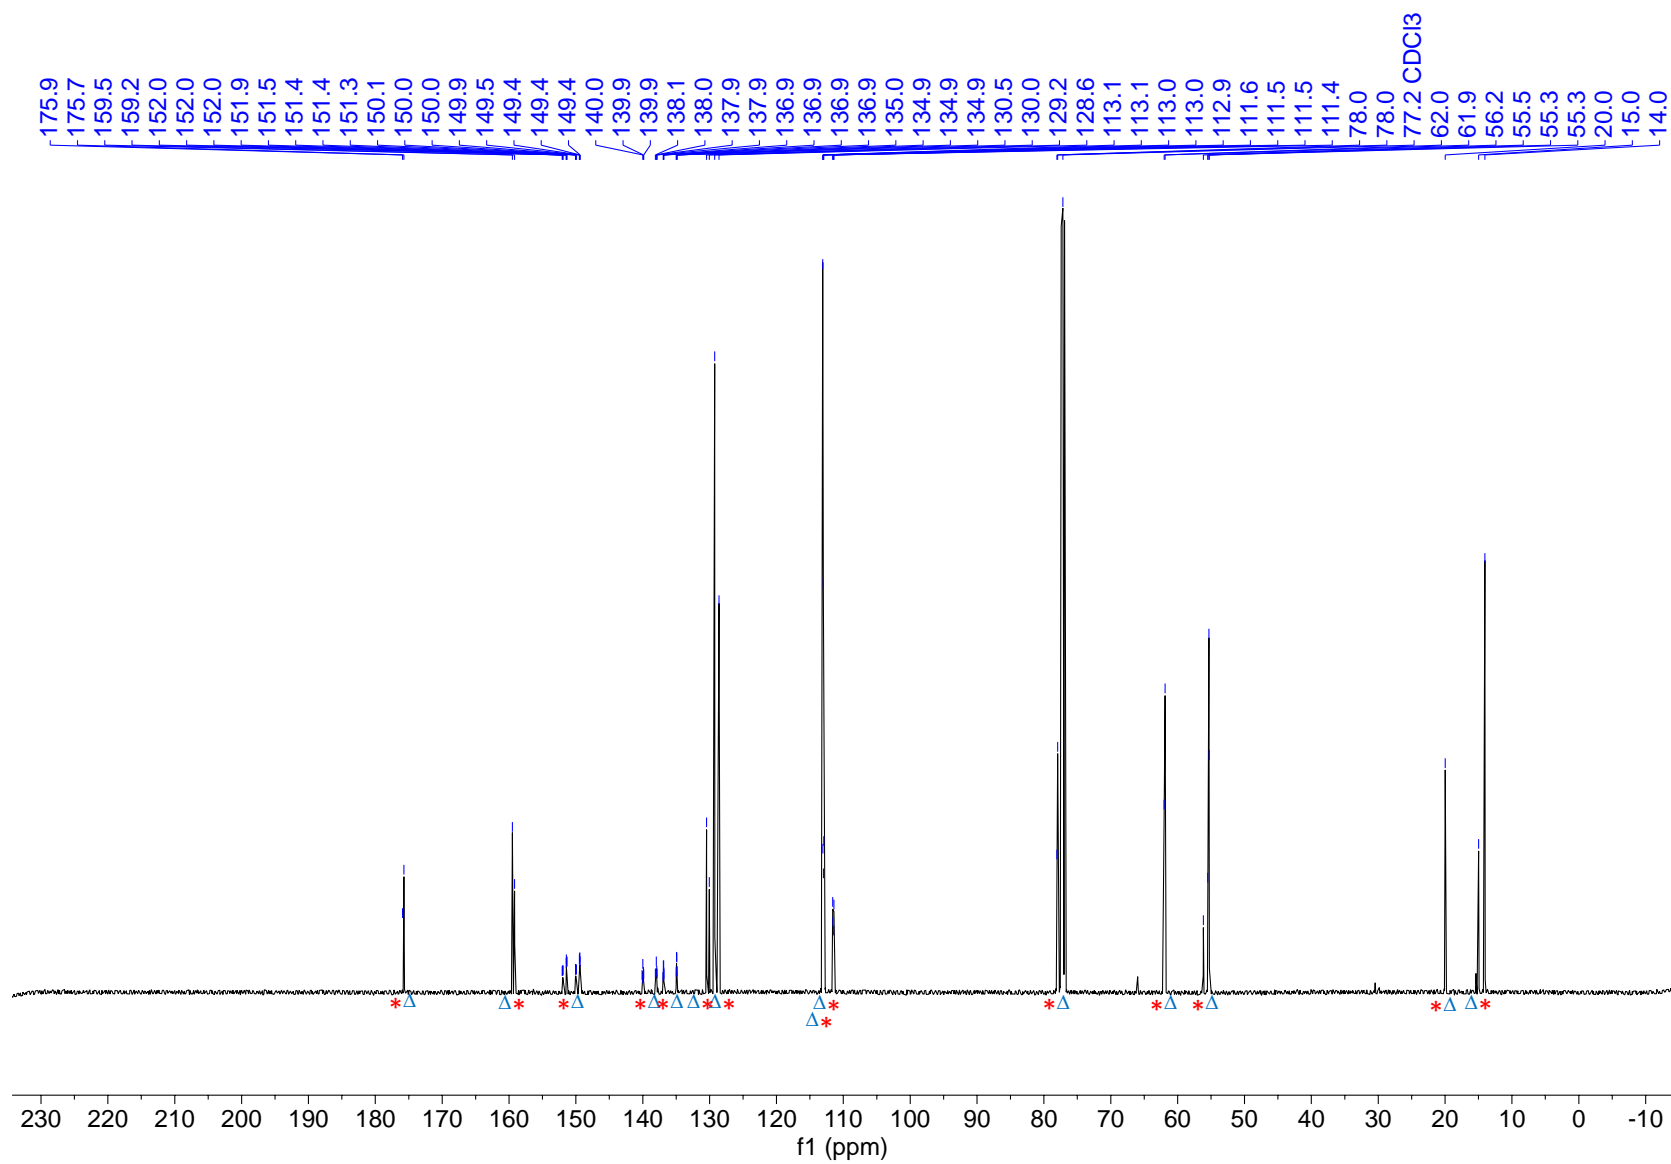

Figure S44:  $^{19}\text{F}$  NMR (470.6 MHz,  $\text{CDCl}_3$ , 298 K) spectrum of **21**.

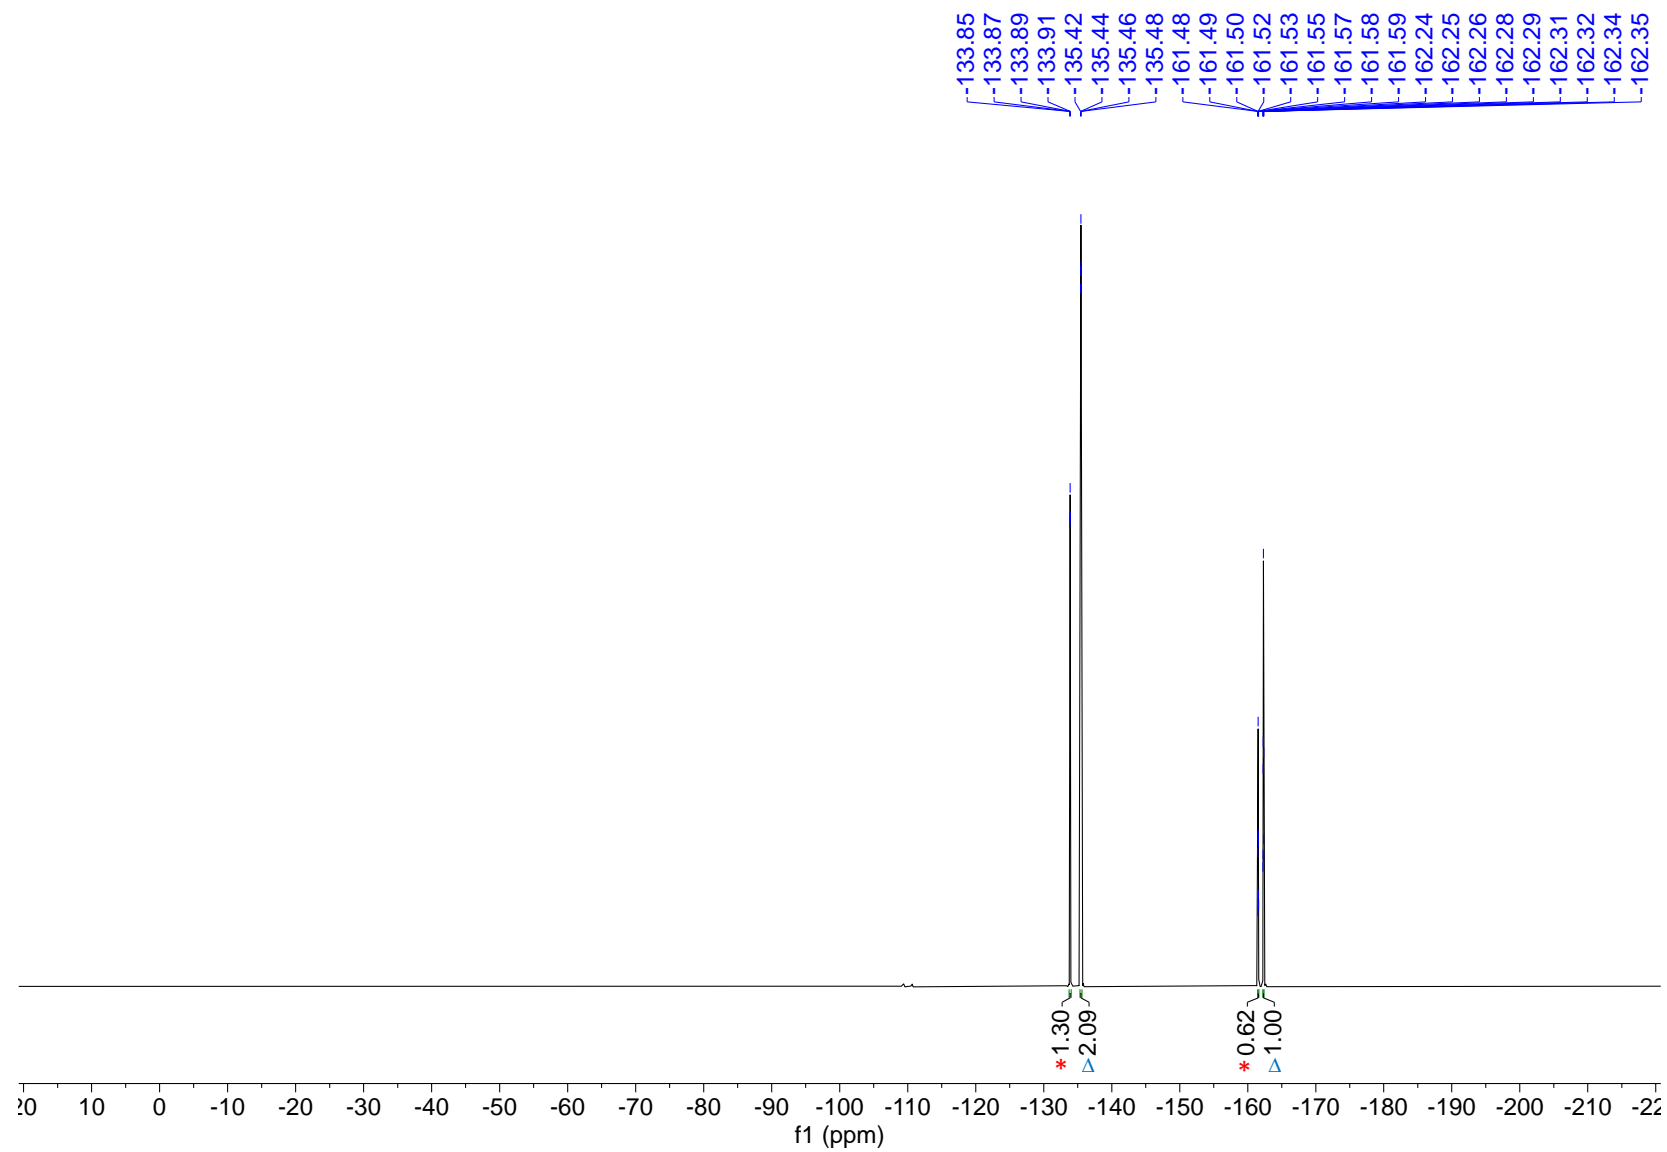

Figure S45:  $^1\text{H}$  NMR (500.2 MHz,  $\text{CDCl}_3$ , 298 K) spectrum of **2m**.

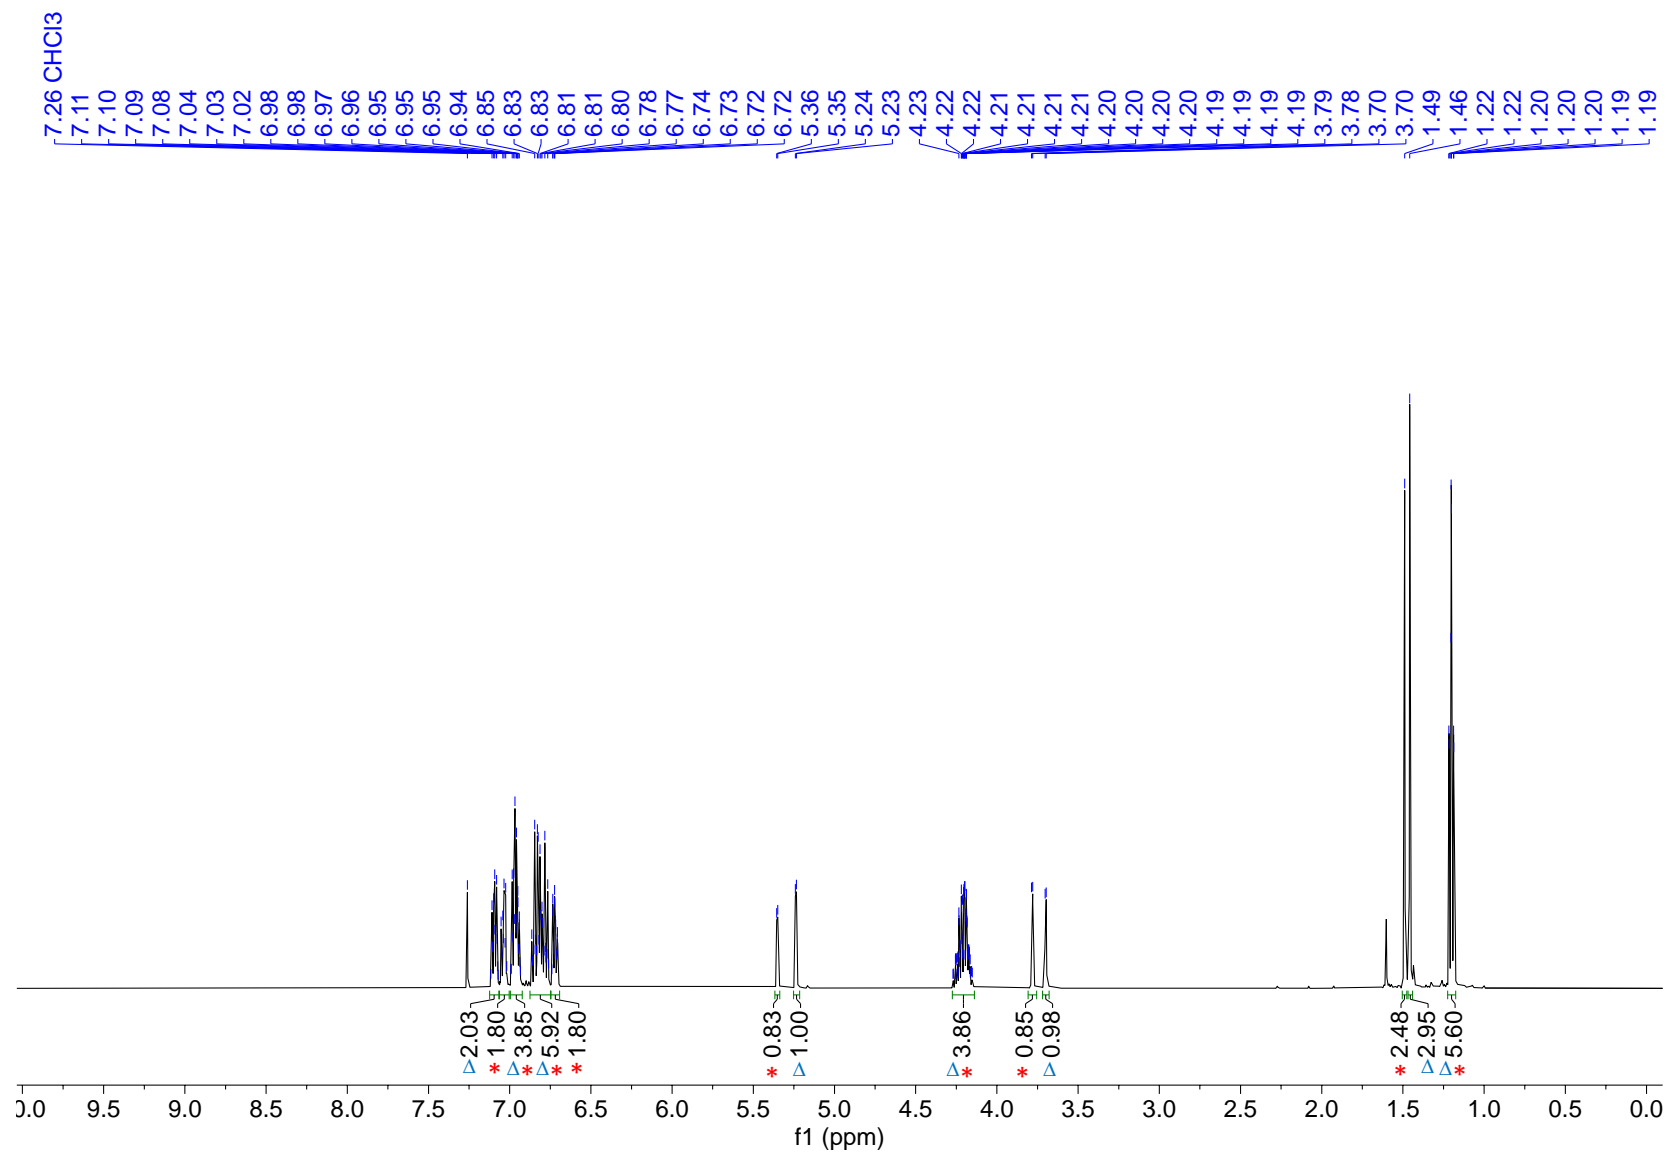

Figure S46:  $^{13}\text{C}$  NMR (125.8 MHz,  $\text{CDCl}_3$ , 298 K) spectrum of **2m**.

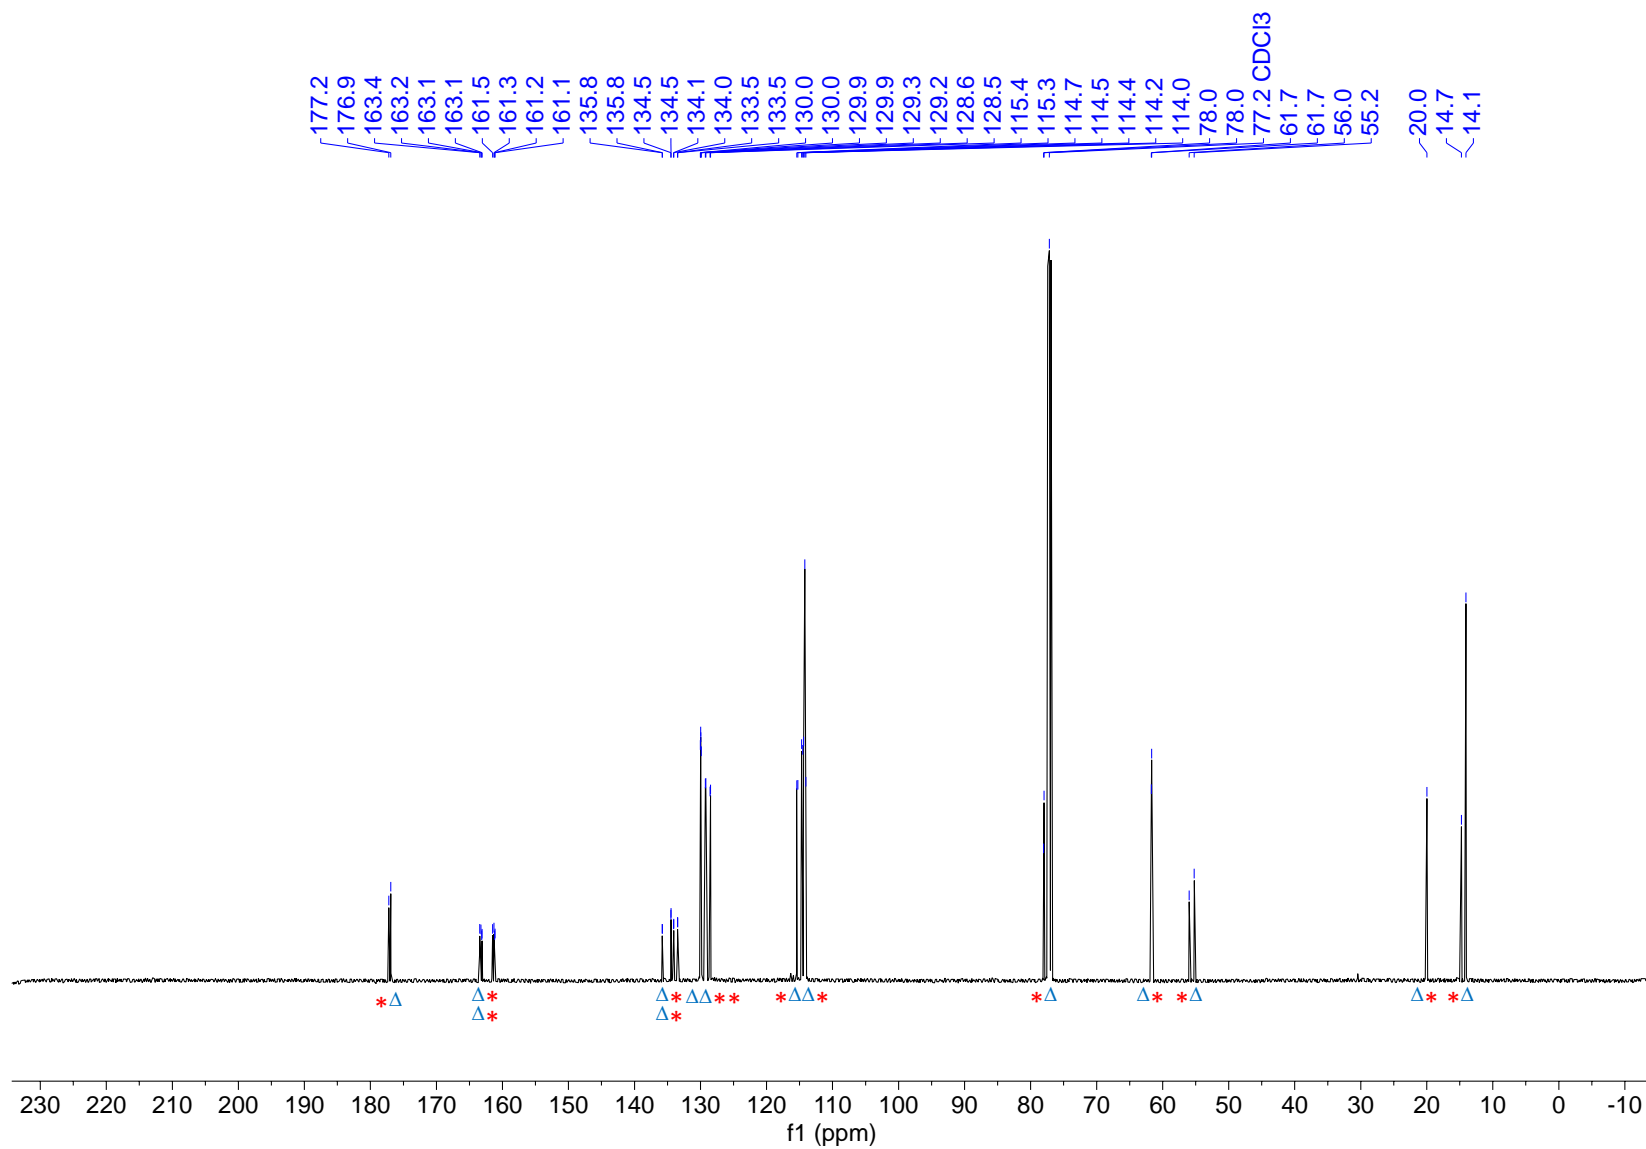



Figure S47:  $^{19}\text{F}$  NMR (470.6 MHz,  $\text{CDCl}_3$ , 298 K) spectrum of **2m**.

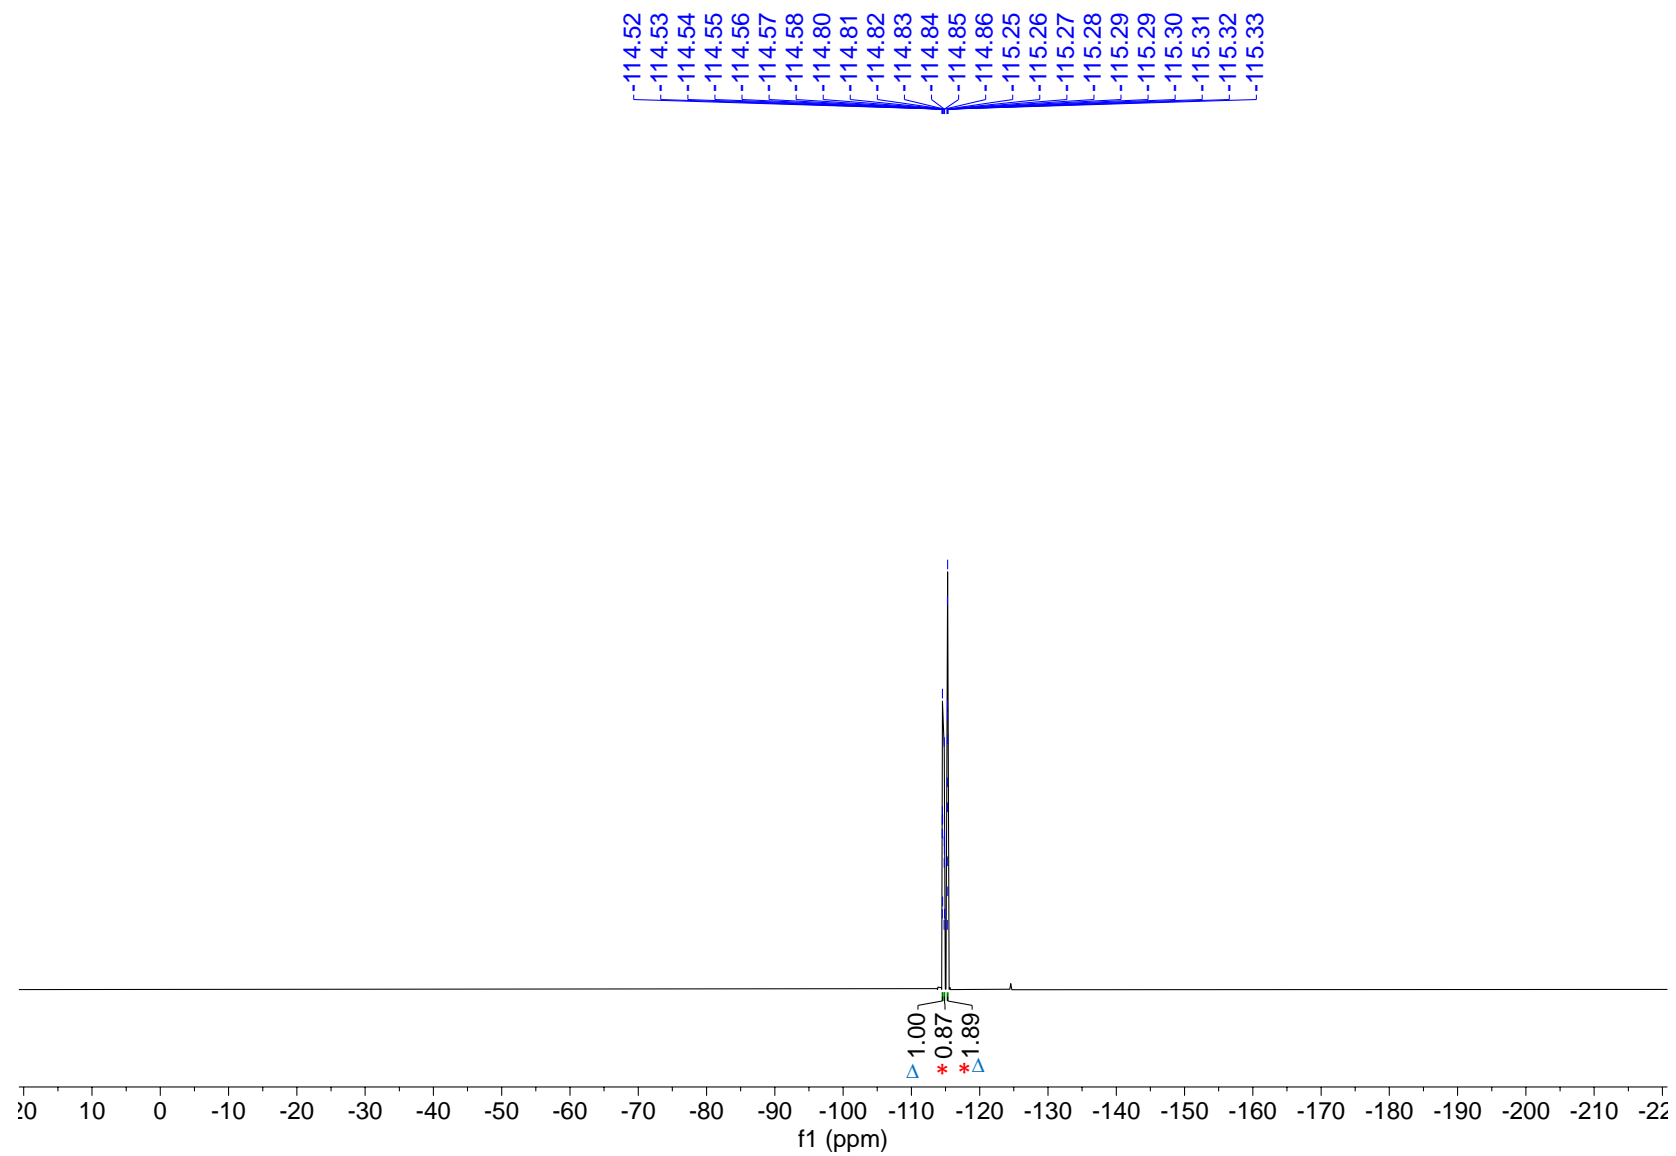

Figure S48:  $^1\text{H}$  NMR (500.2 MHz,  $\text{CDCl}_3$ , 298 K) spectrum of **2n**.

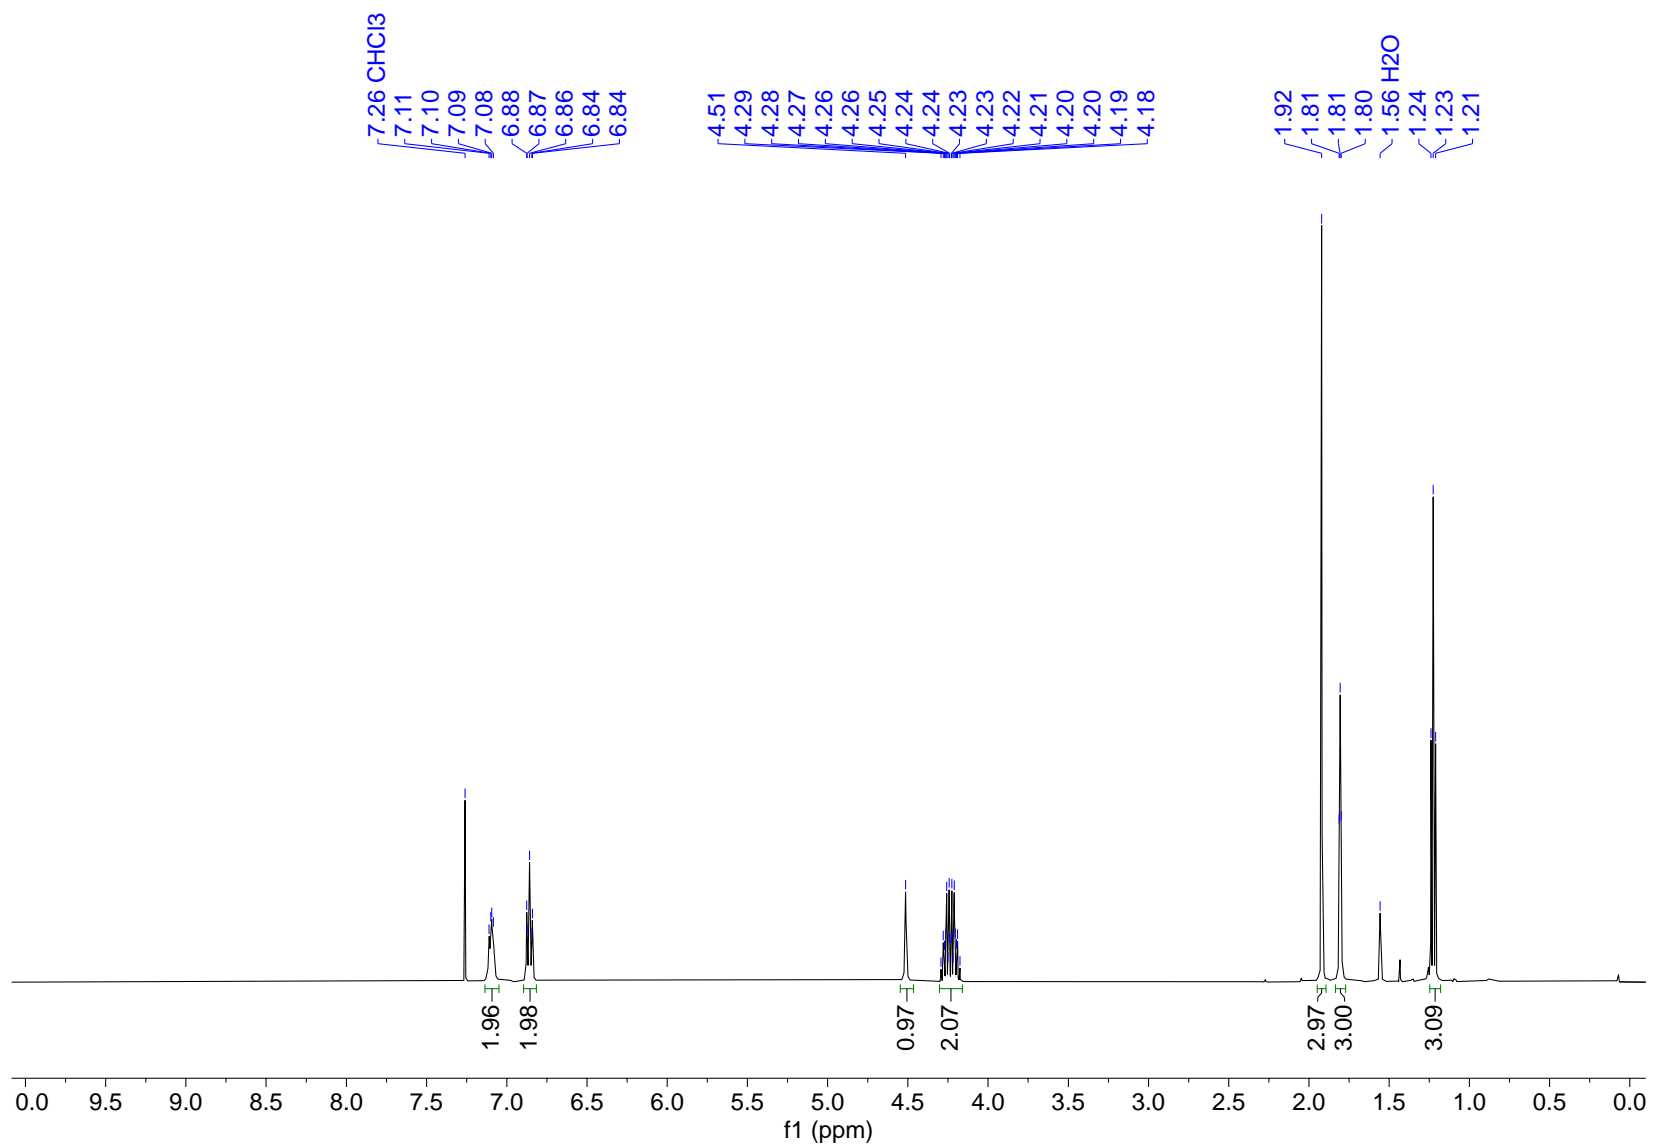

Figure S49:  $^{13}\text{C}$  NMR (125.8 MHz,  $\text{CDCl}_3$ , 298 K) spectrum of **2n**.

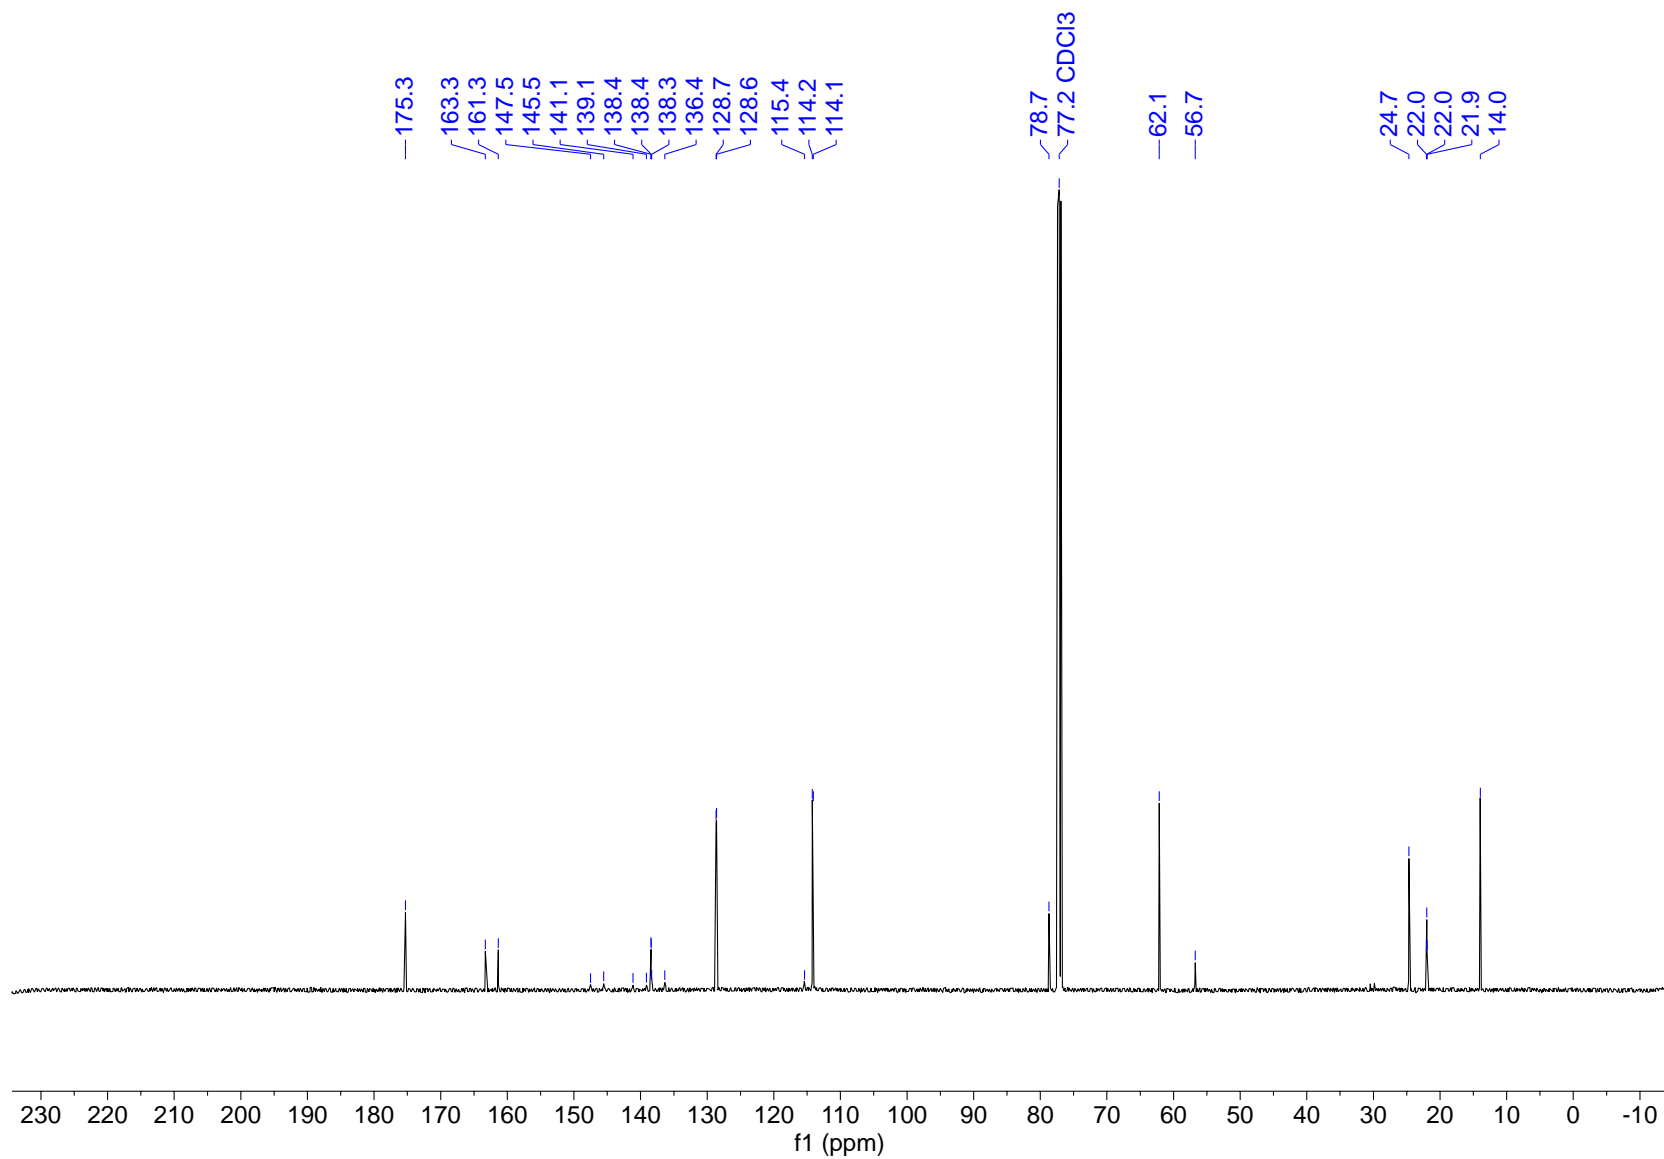

Figure S50:  $^{19}\text{F}$  NMR (470.2 MHz,  $\text{CDCl}_3$ , 298 K) spectrum of **2n**.

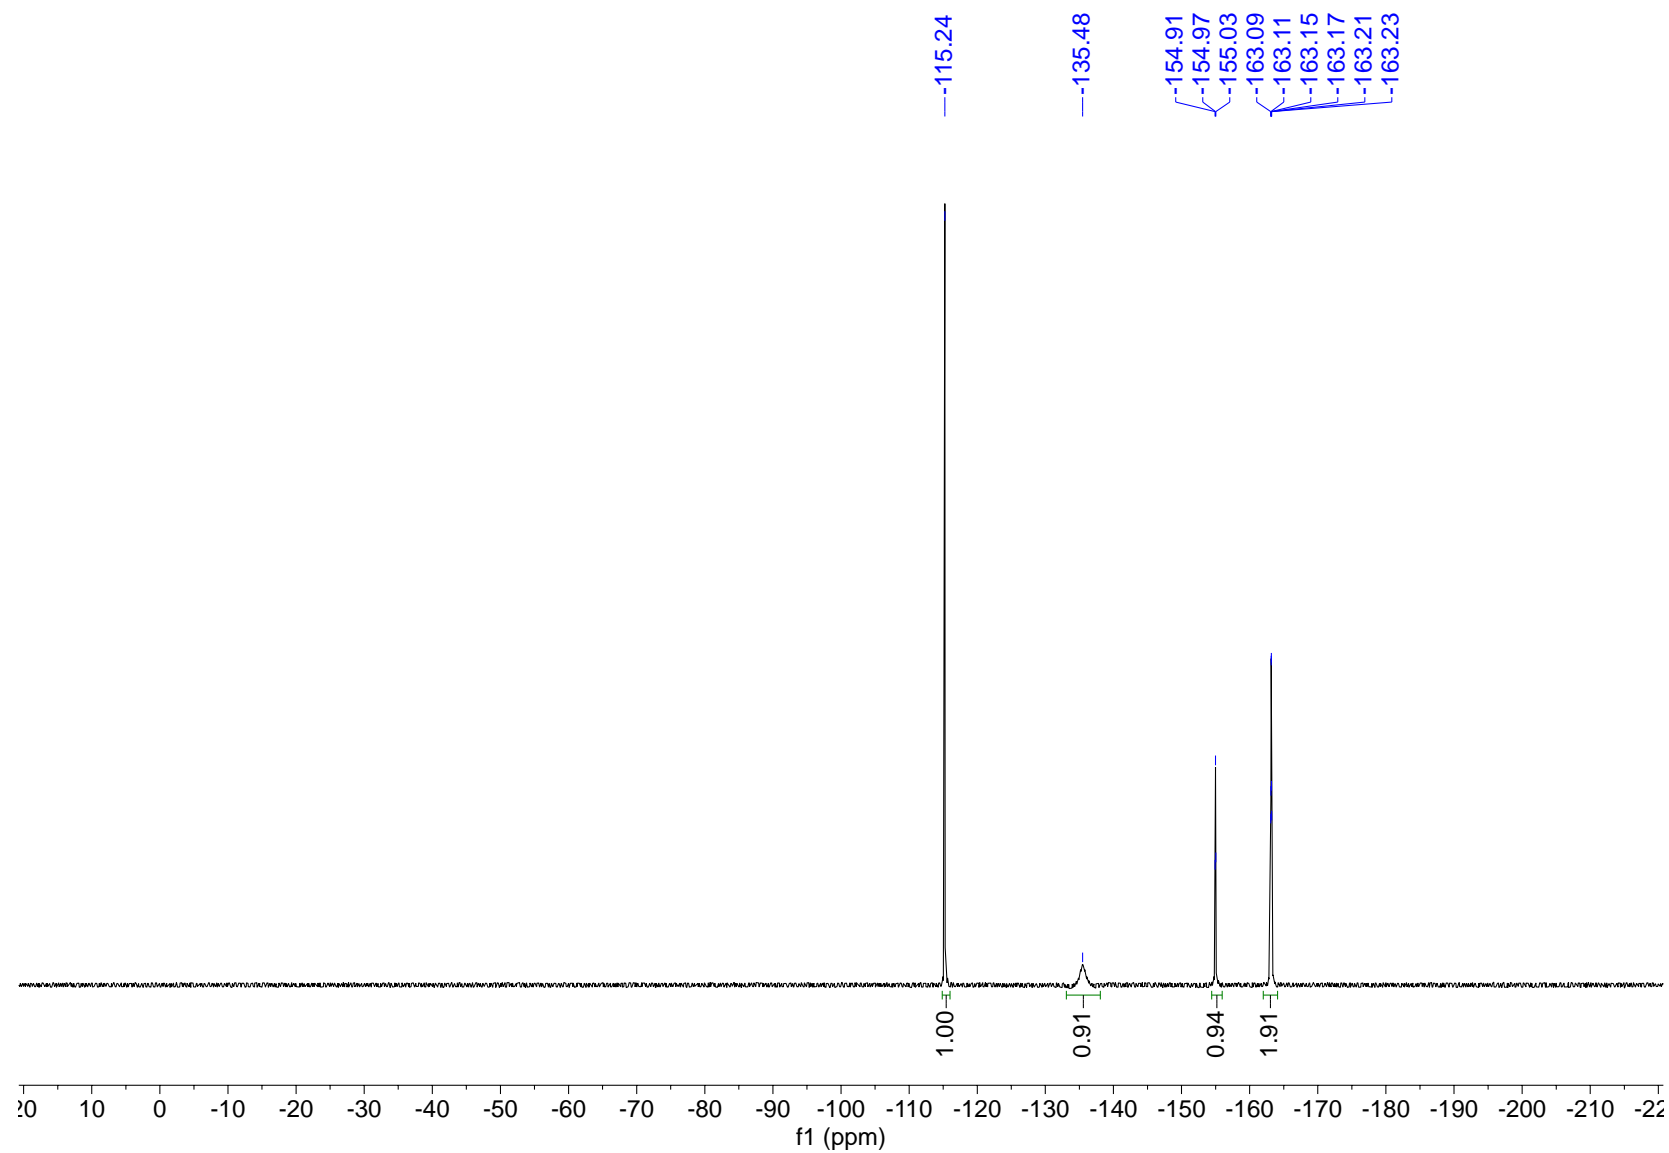

Figure S51:  $^1\text{H}$  NMR (500.2 MHz,  $\text{CDCl}_3$ , 298 K) spectrum of **2t**.

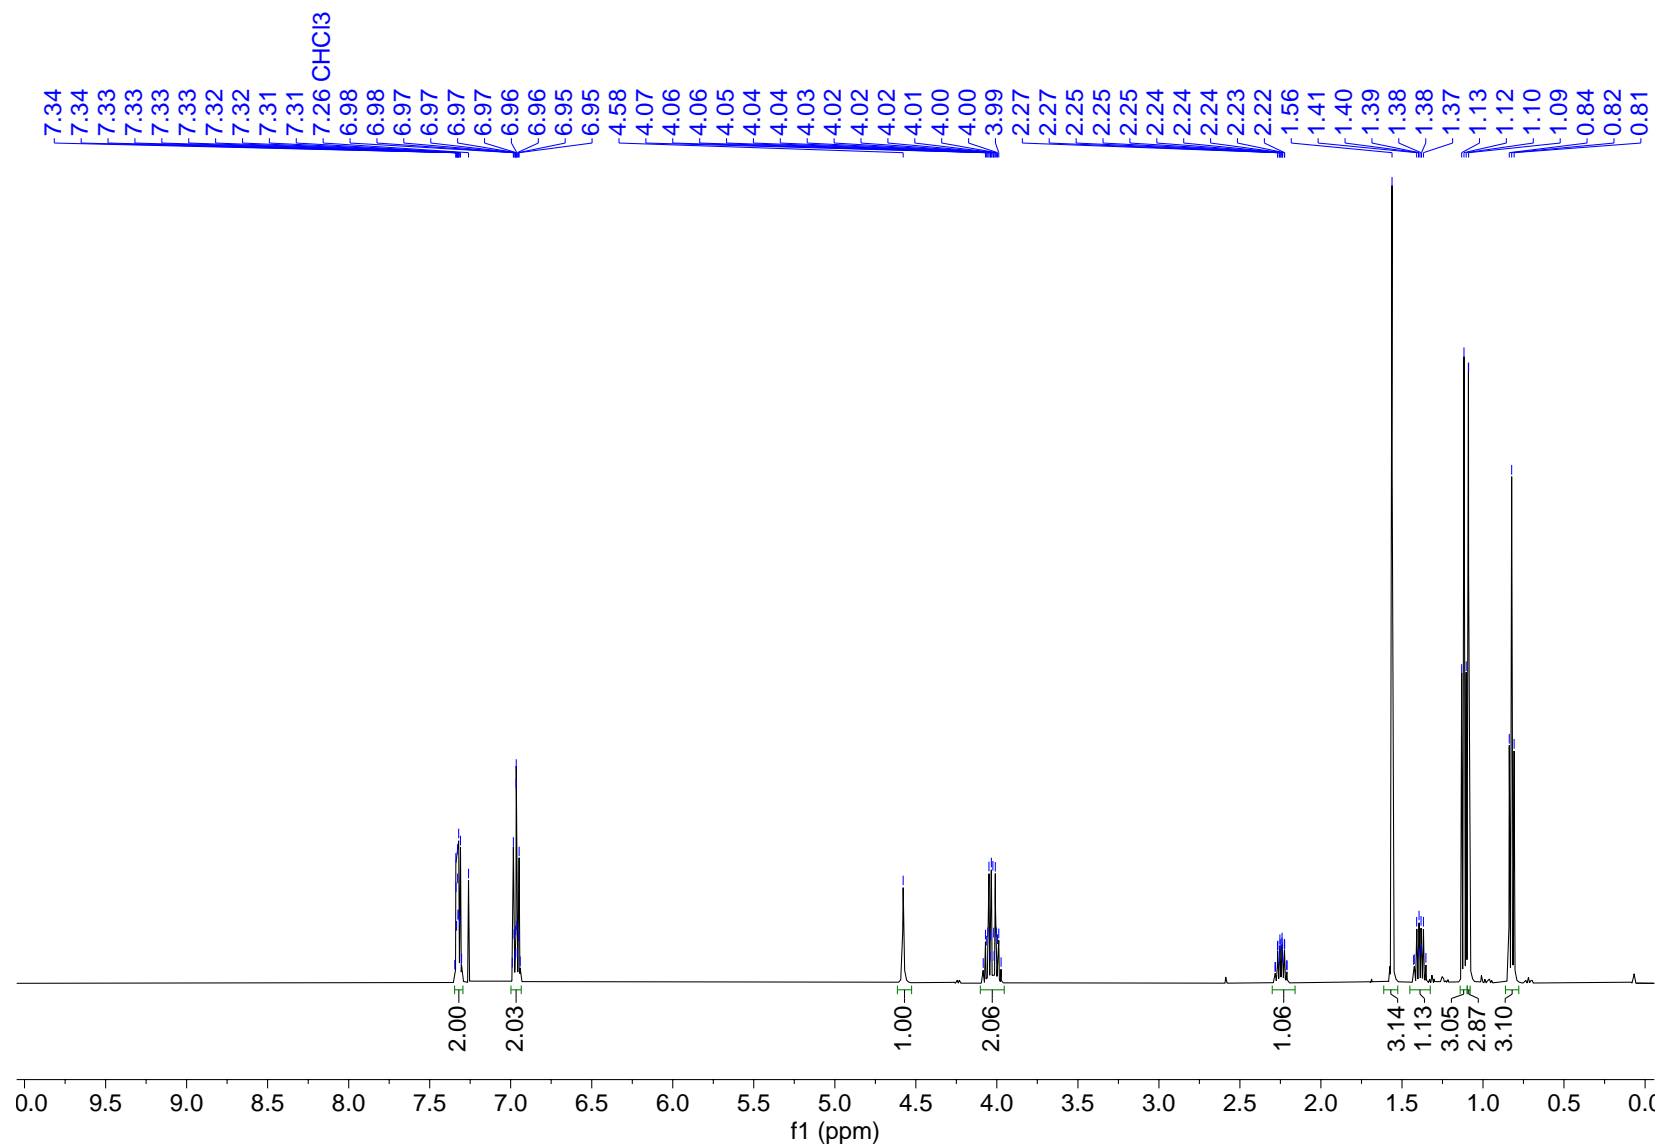

Figure S52:  $^{13}\text{C}$  NMR (125.8 MHz,  $\text{CDCl}_3$ , 298 K) spectrum of **2t**.

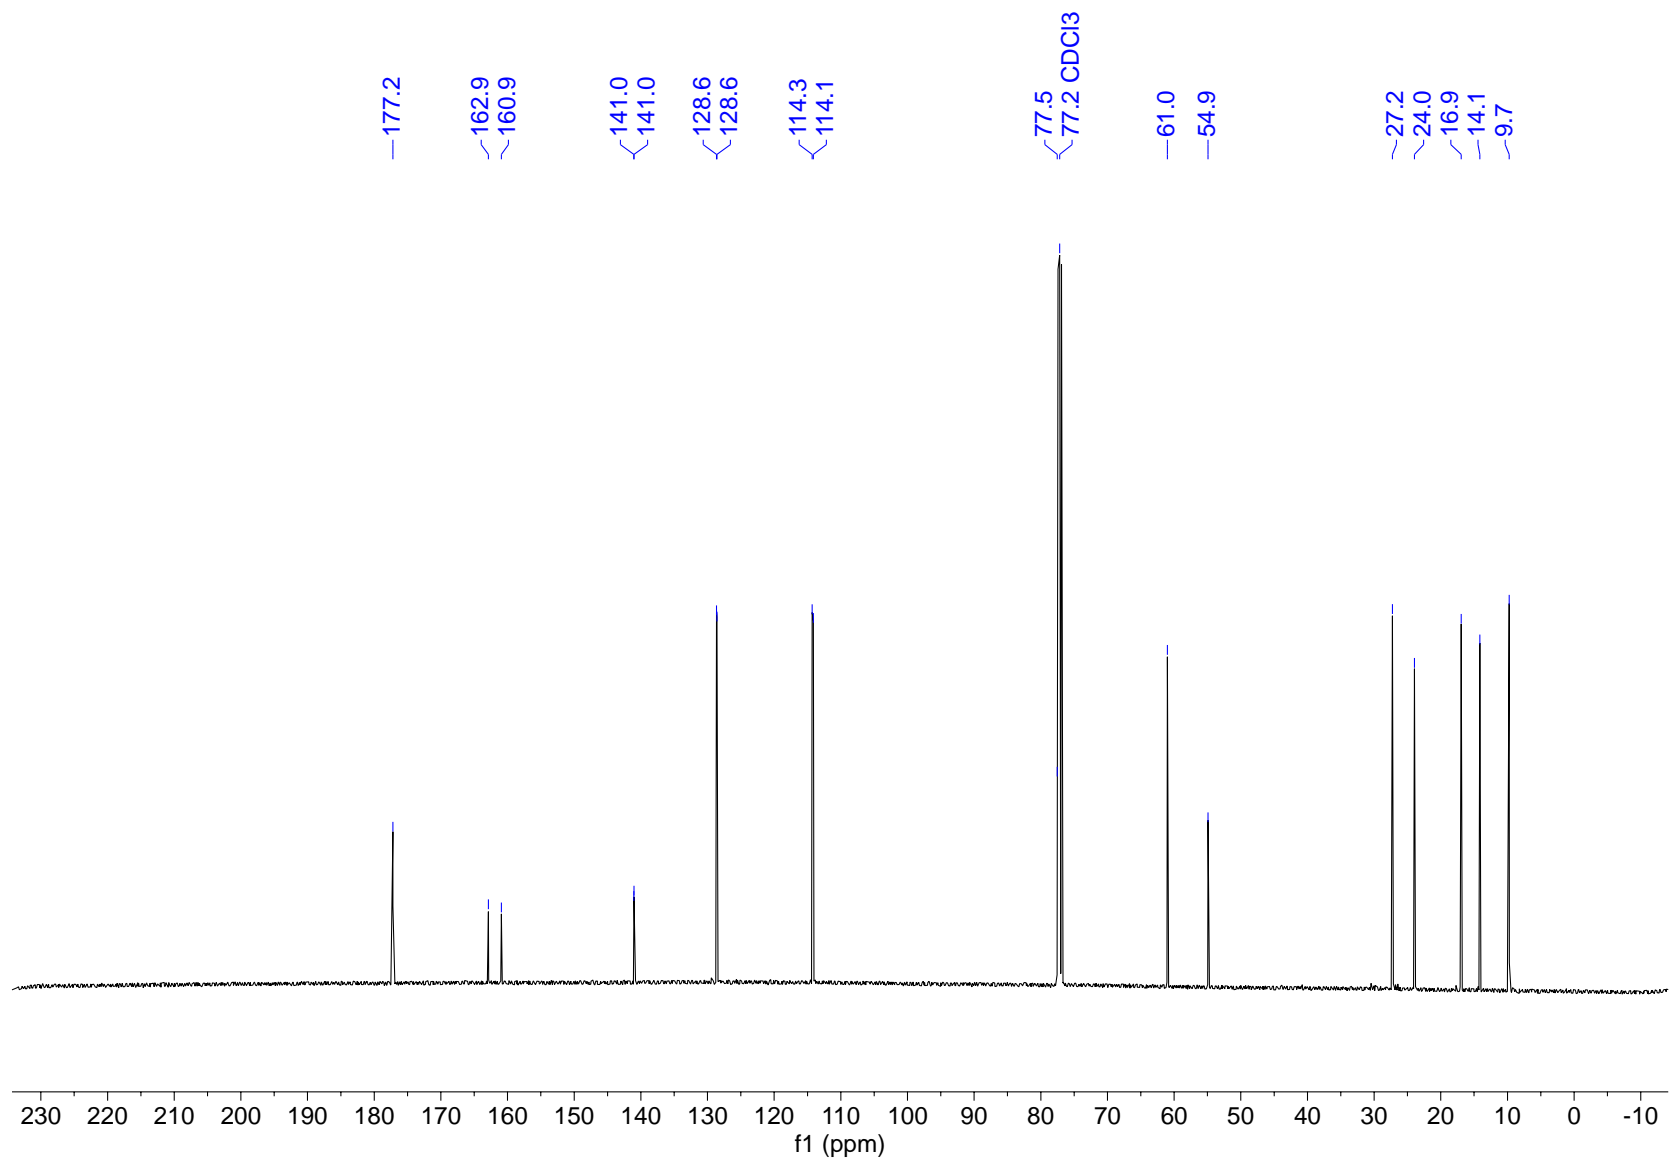

Figure S53:  $^{19}\text{F}$  NMR (470.2 MHz,  $\text{CDCl}_3$ , 298 K) spectrum of **2t**.

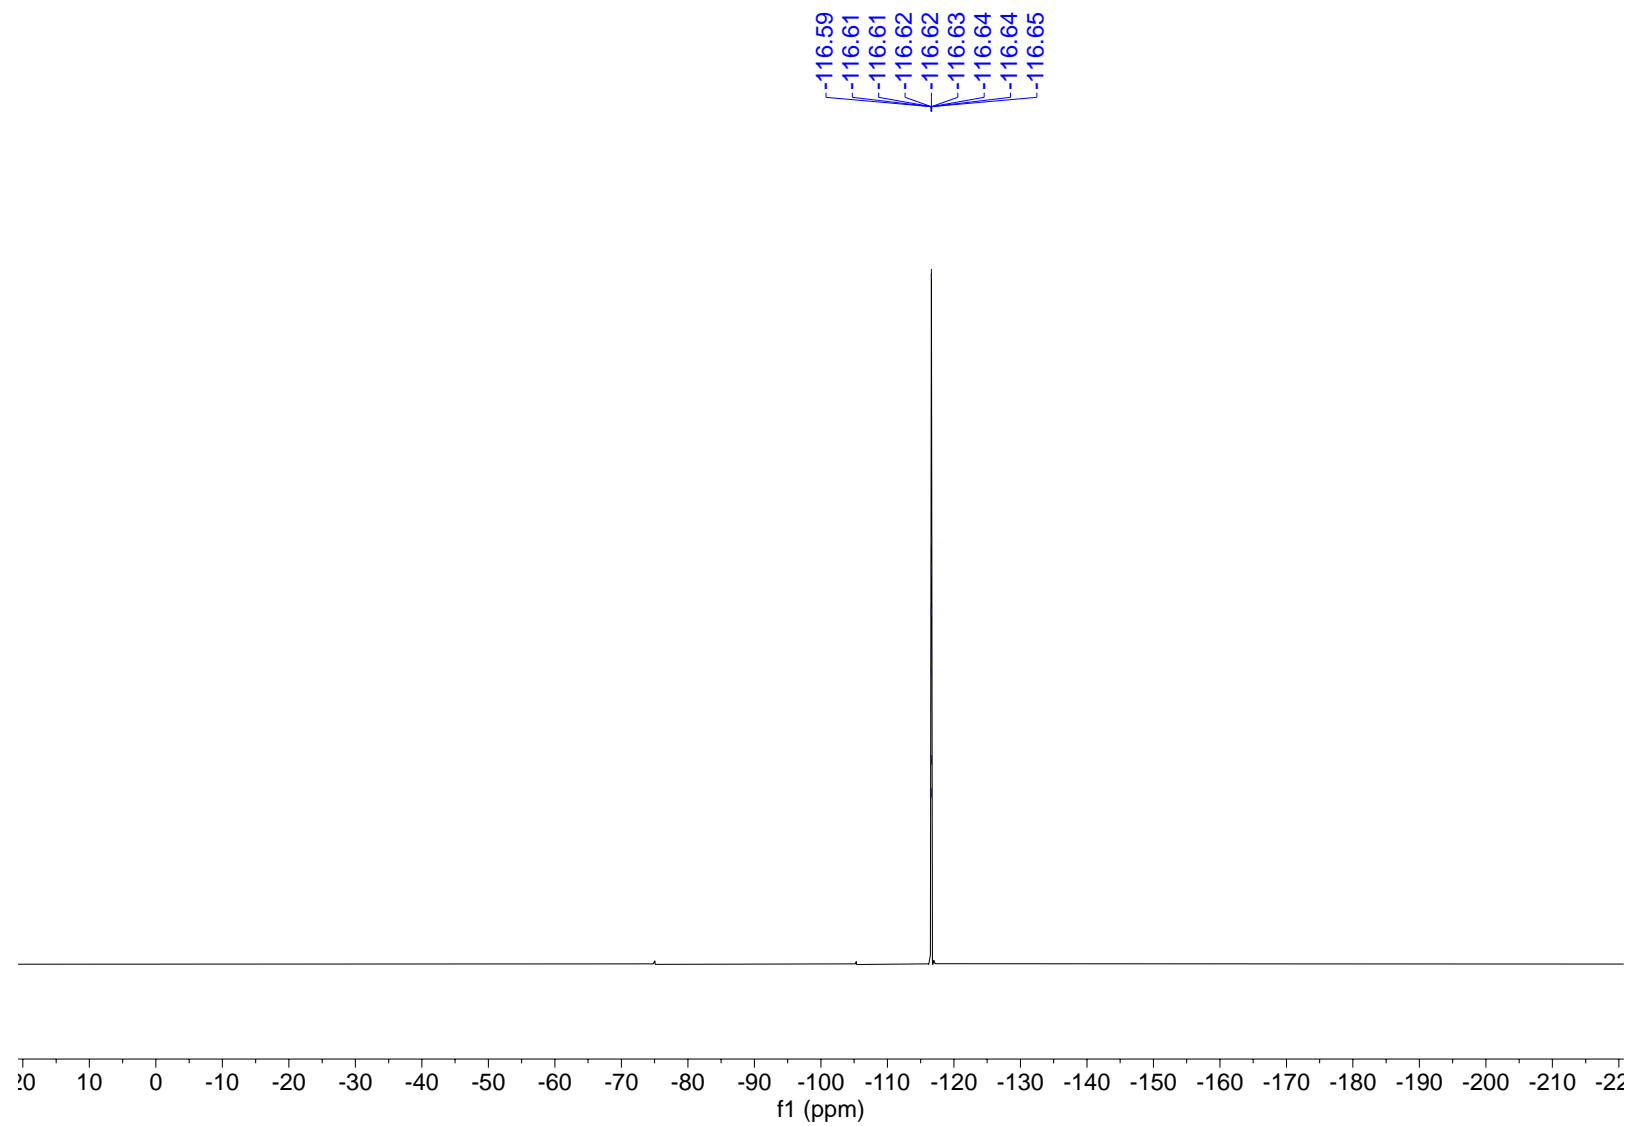

Figure S54:  $^1\text{H}$  NMR (400.1 MHz,  $\text{CDCl}_3$ , 298 K) spectrum of **2o**.

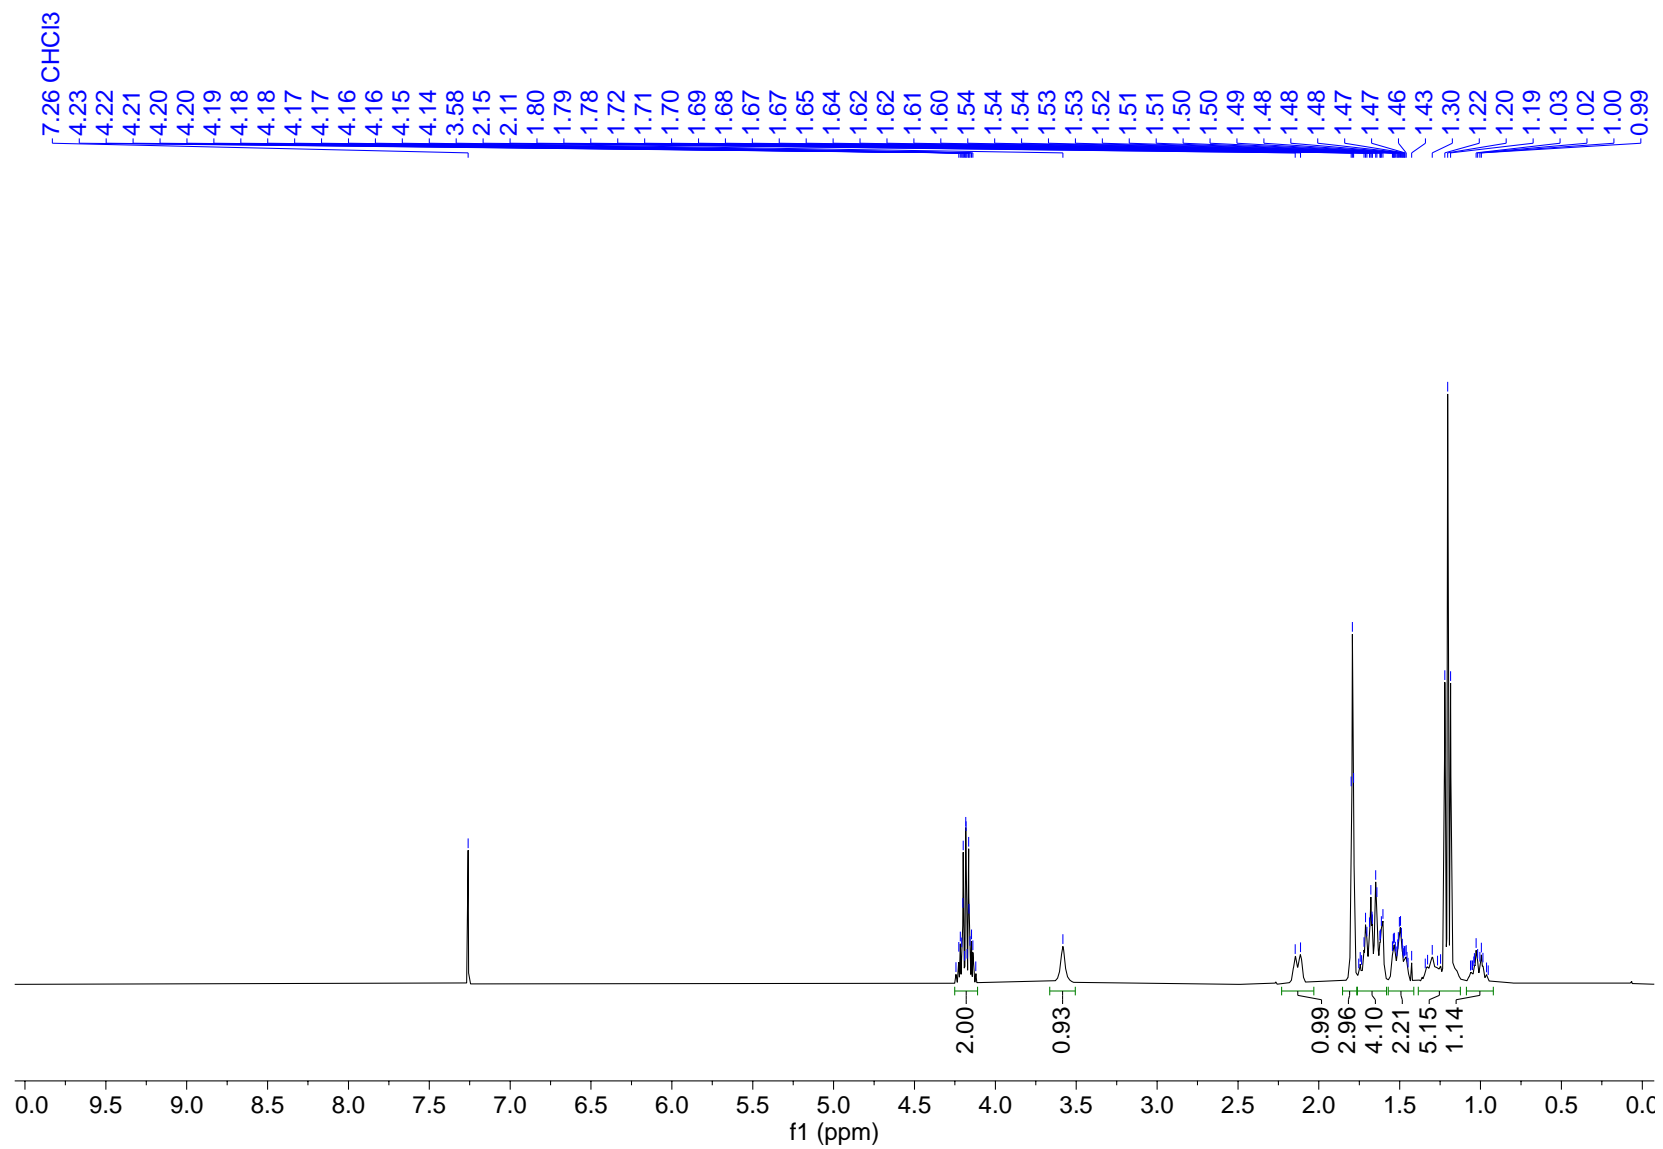



Figure S55:  $^{13}\text{C}$  NMR (125.8 MHz,  $\text{CDCl}_3$ , 298 K) spectrum of **2o**.

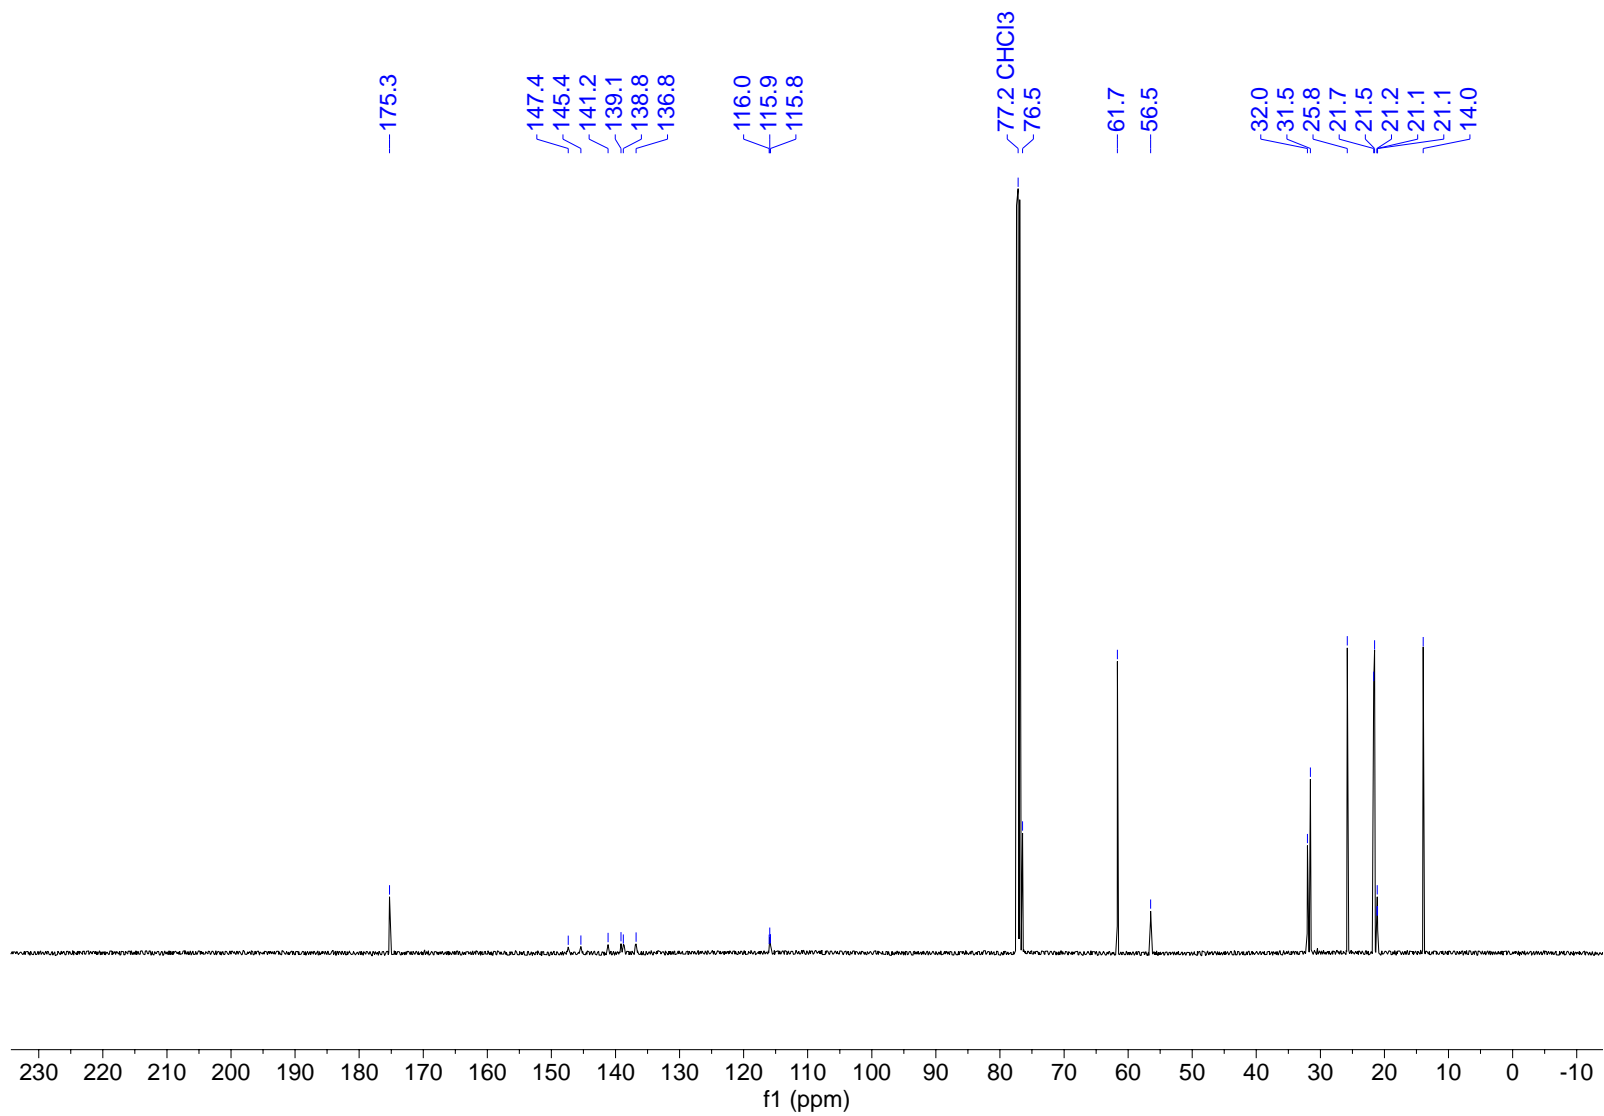

Figure S56:  $^{19}\text{F}$  NMR (376.5 MHz,  $\text{CDCl}_3$ , 298 K) spectrum of **2o**.

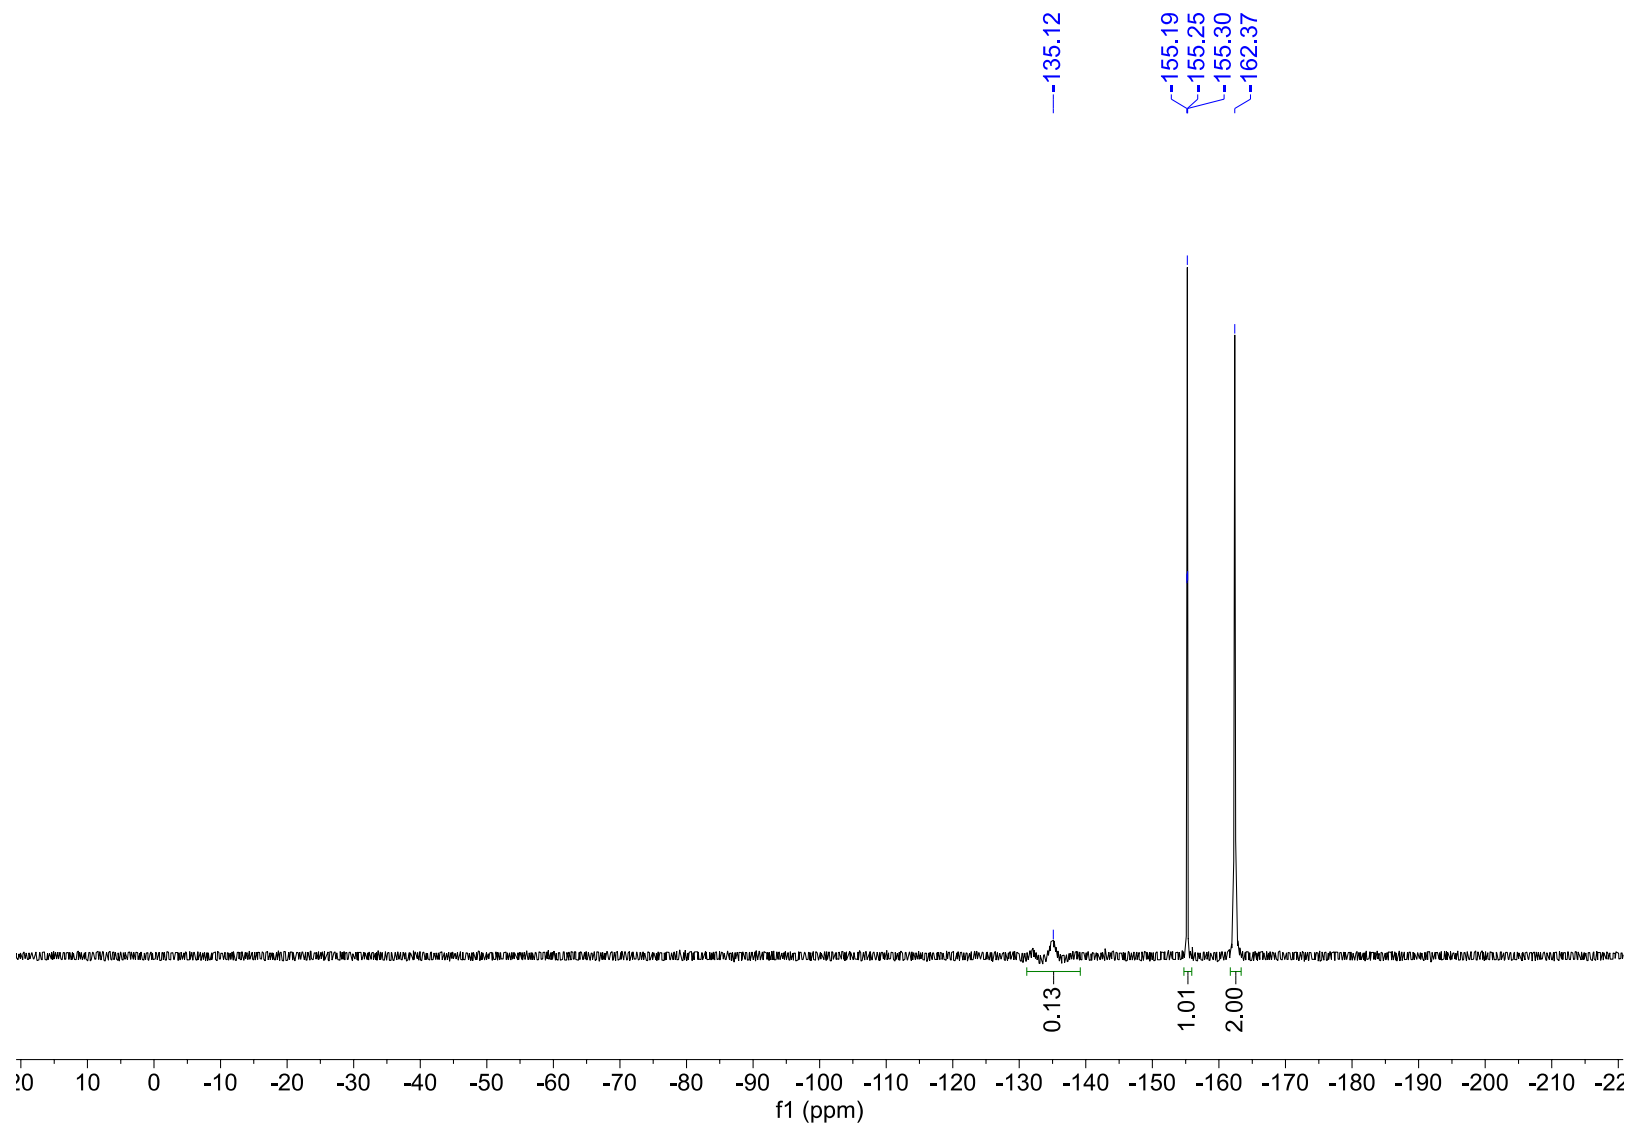

Figure S57:  $^1\text{H}$  NMR (400.1 MHz,  $\text{CDCl}_3$ , 298 K) spectrum of **2p**.

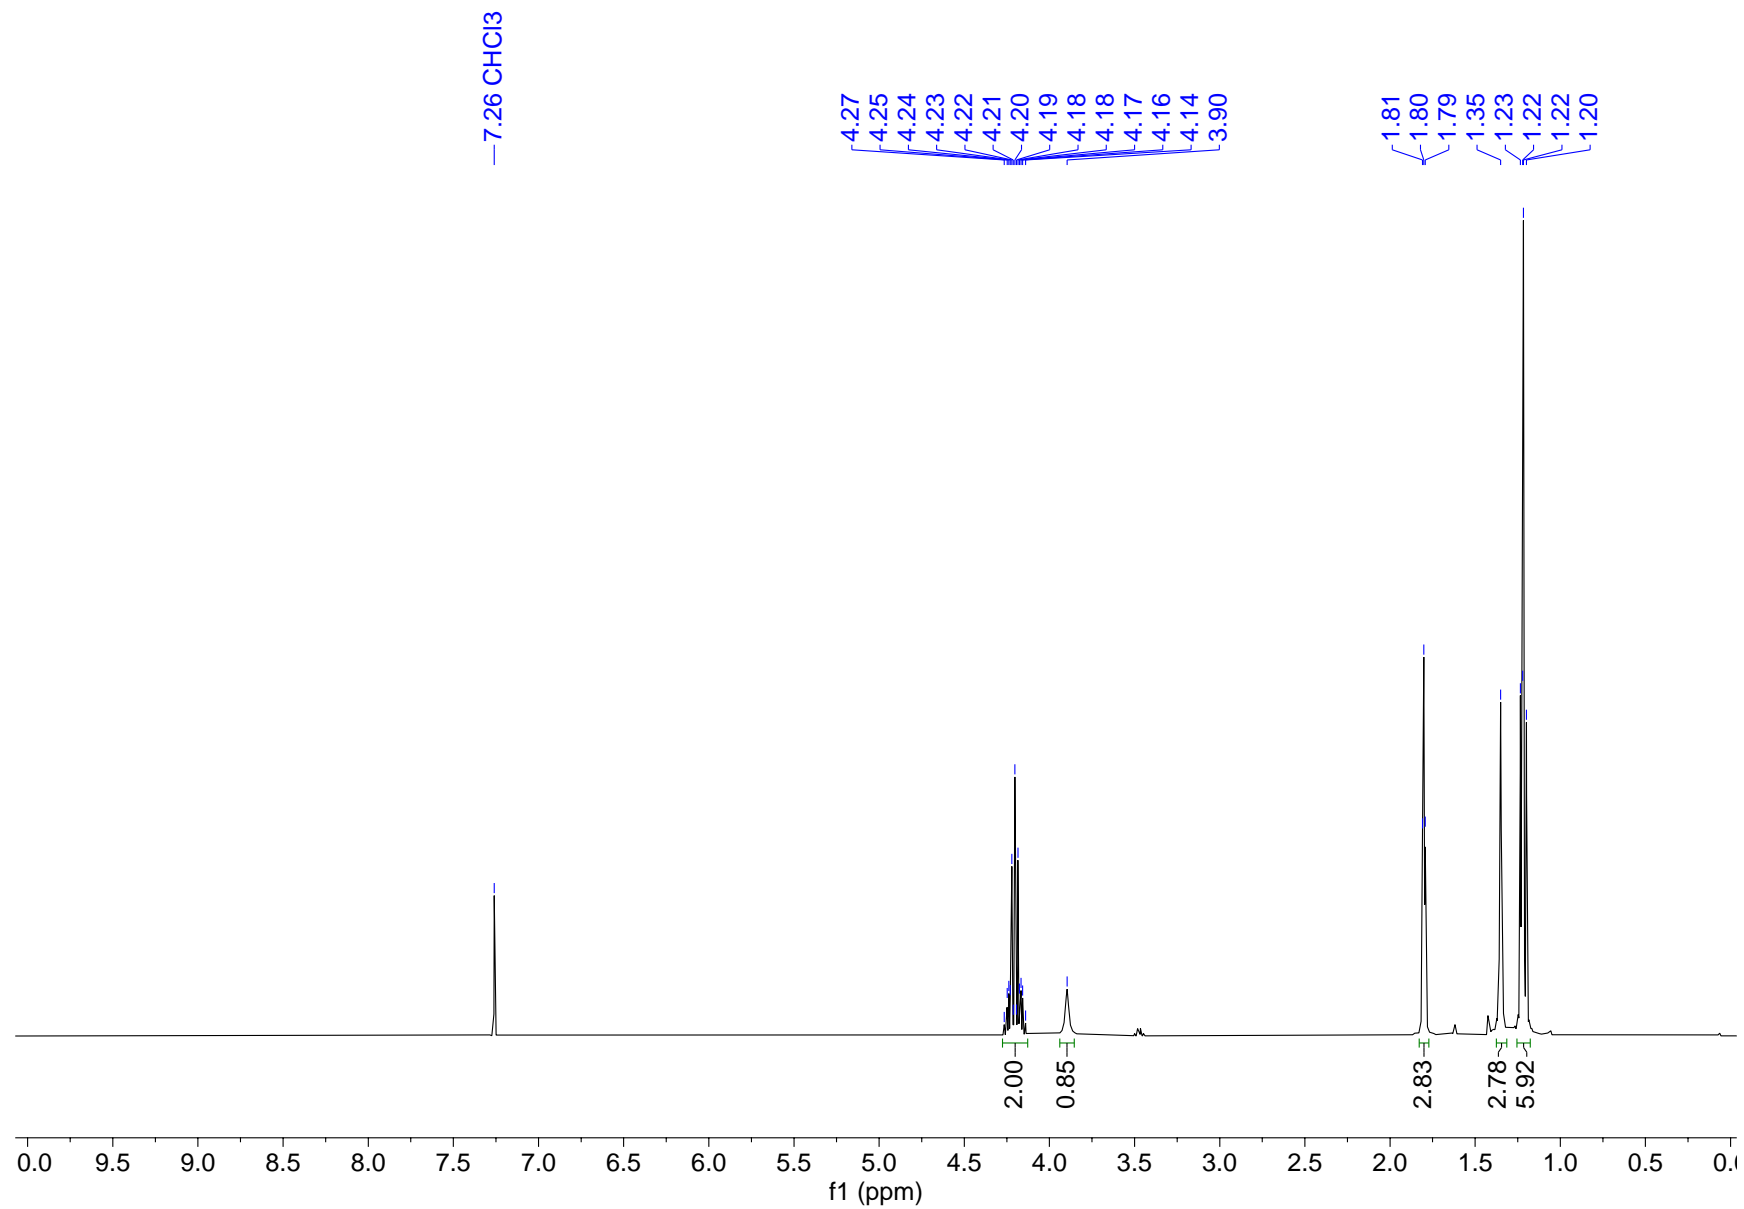

Figure S58:  $^{13}\text{C}$  NMR (125.8 MHz,  $\text{CDCl}_3$ , 298 K) spectrum of **2p**.

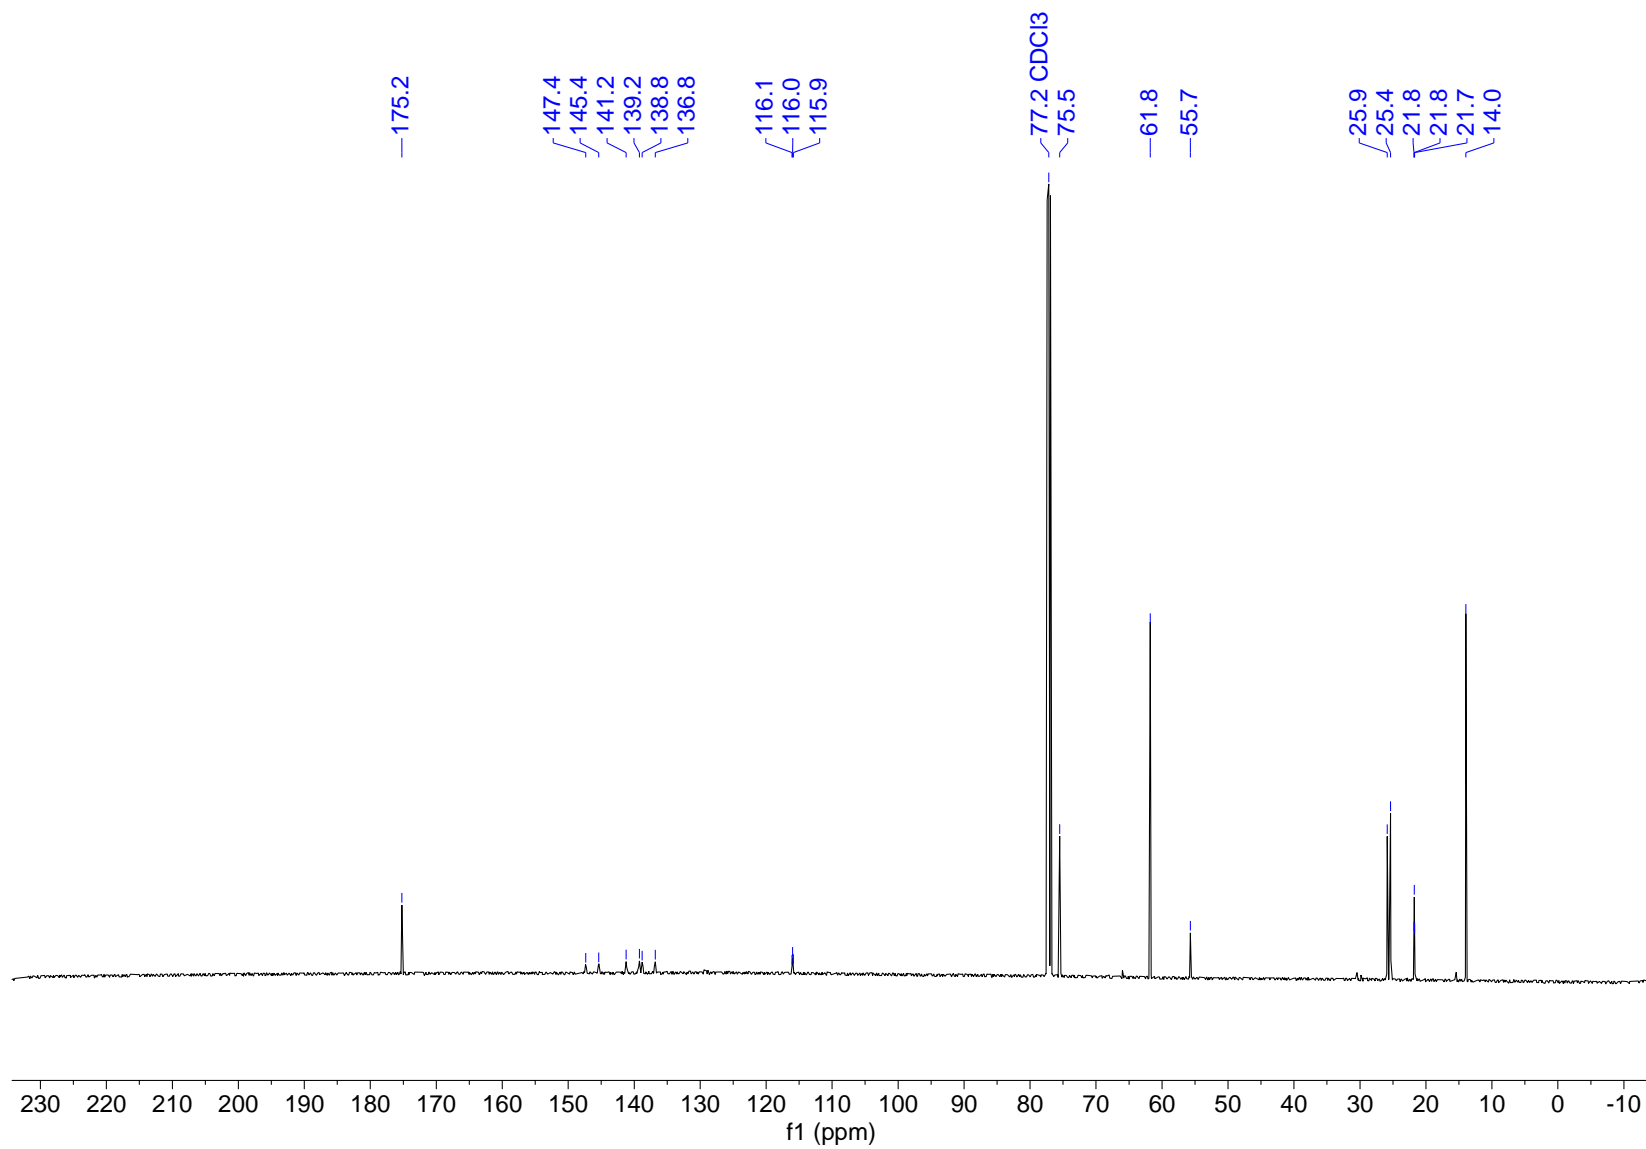

Figure S59:  $^{19}\text{F}$  NMR (376.5 MHz,  $\text{CDCl}_3$ , 298 K) spectrum of **2p**.

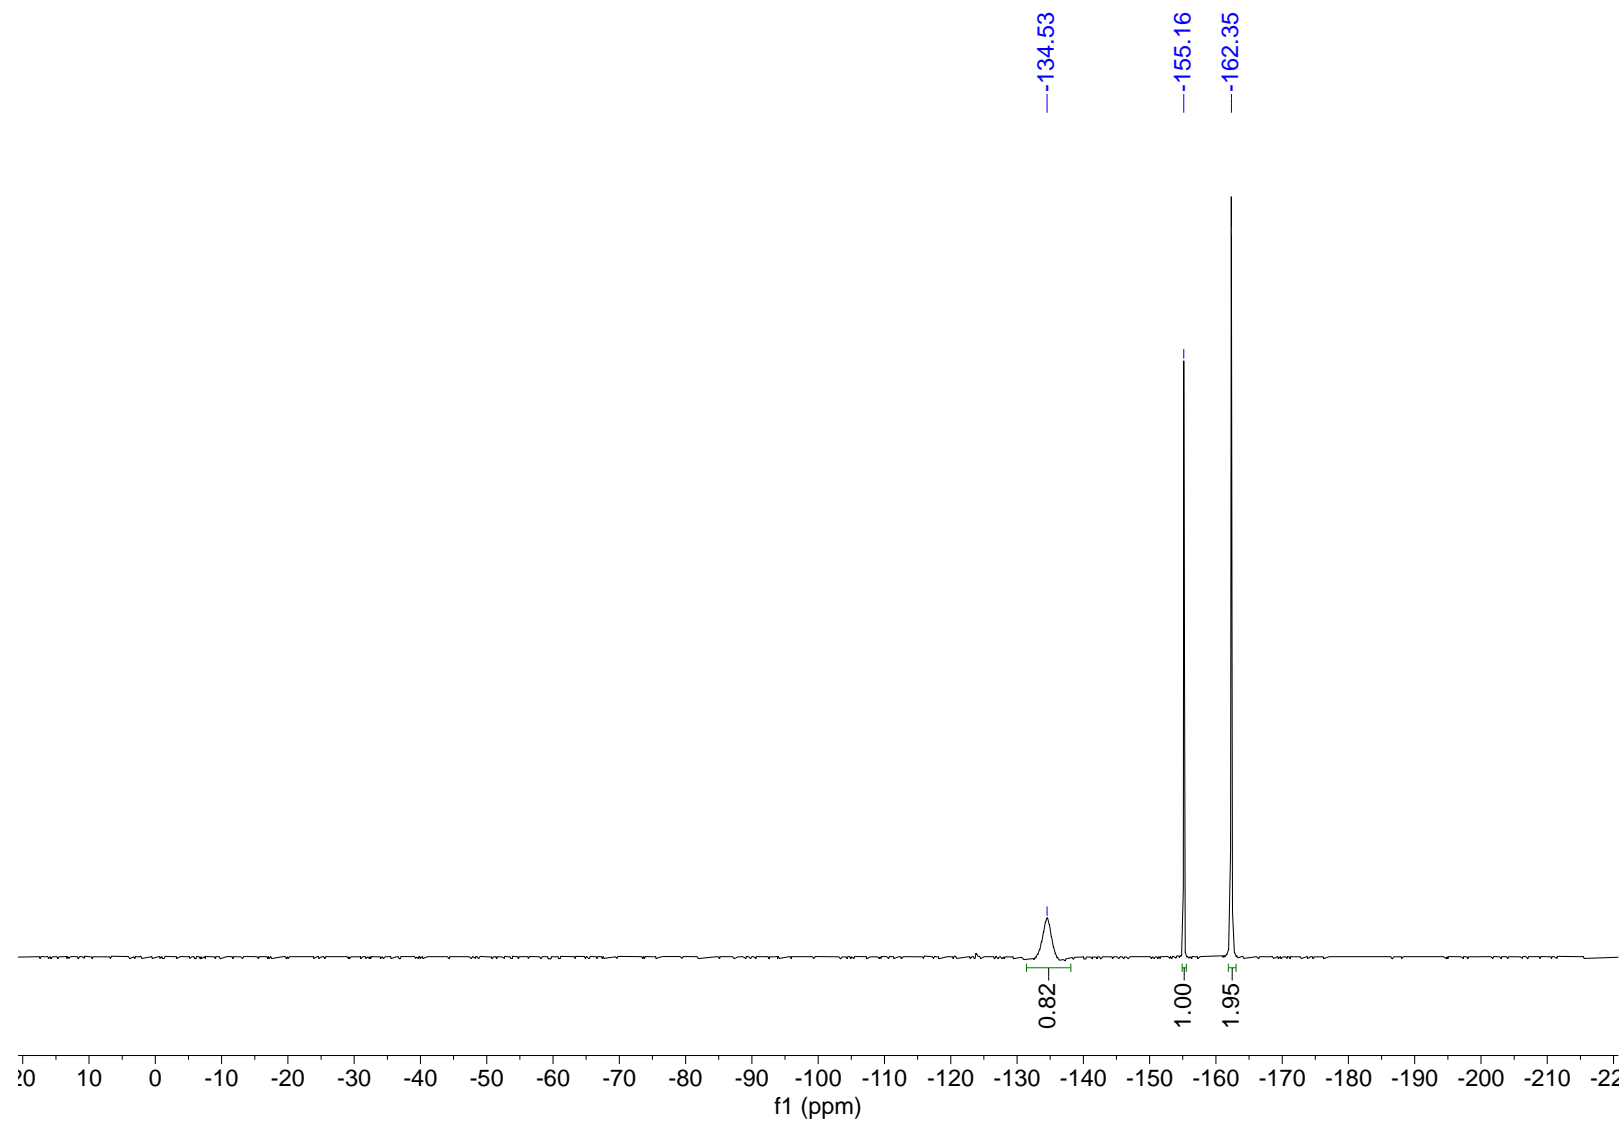

Figure S60:  $^1\text{H}$  NMR (500.2 MHz,  $\text{CDCl}_3$ , 298 K) spectrum of **2q**.

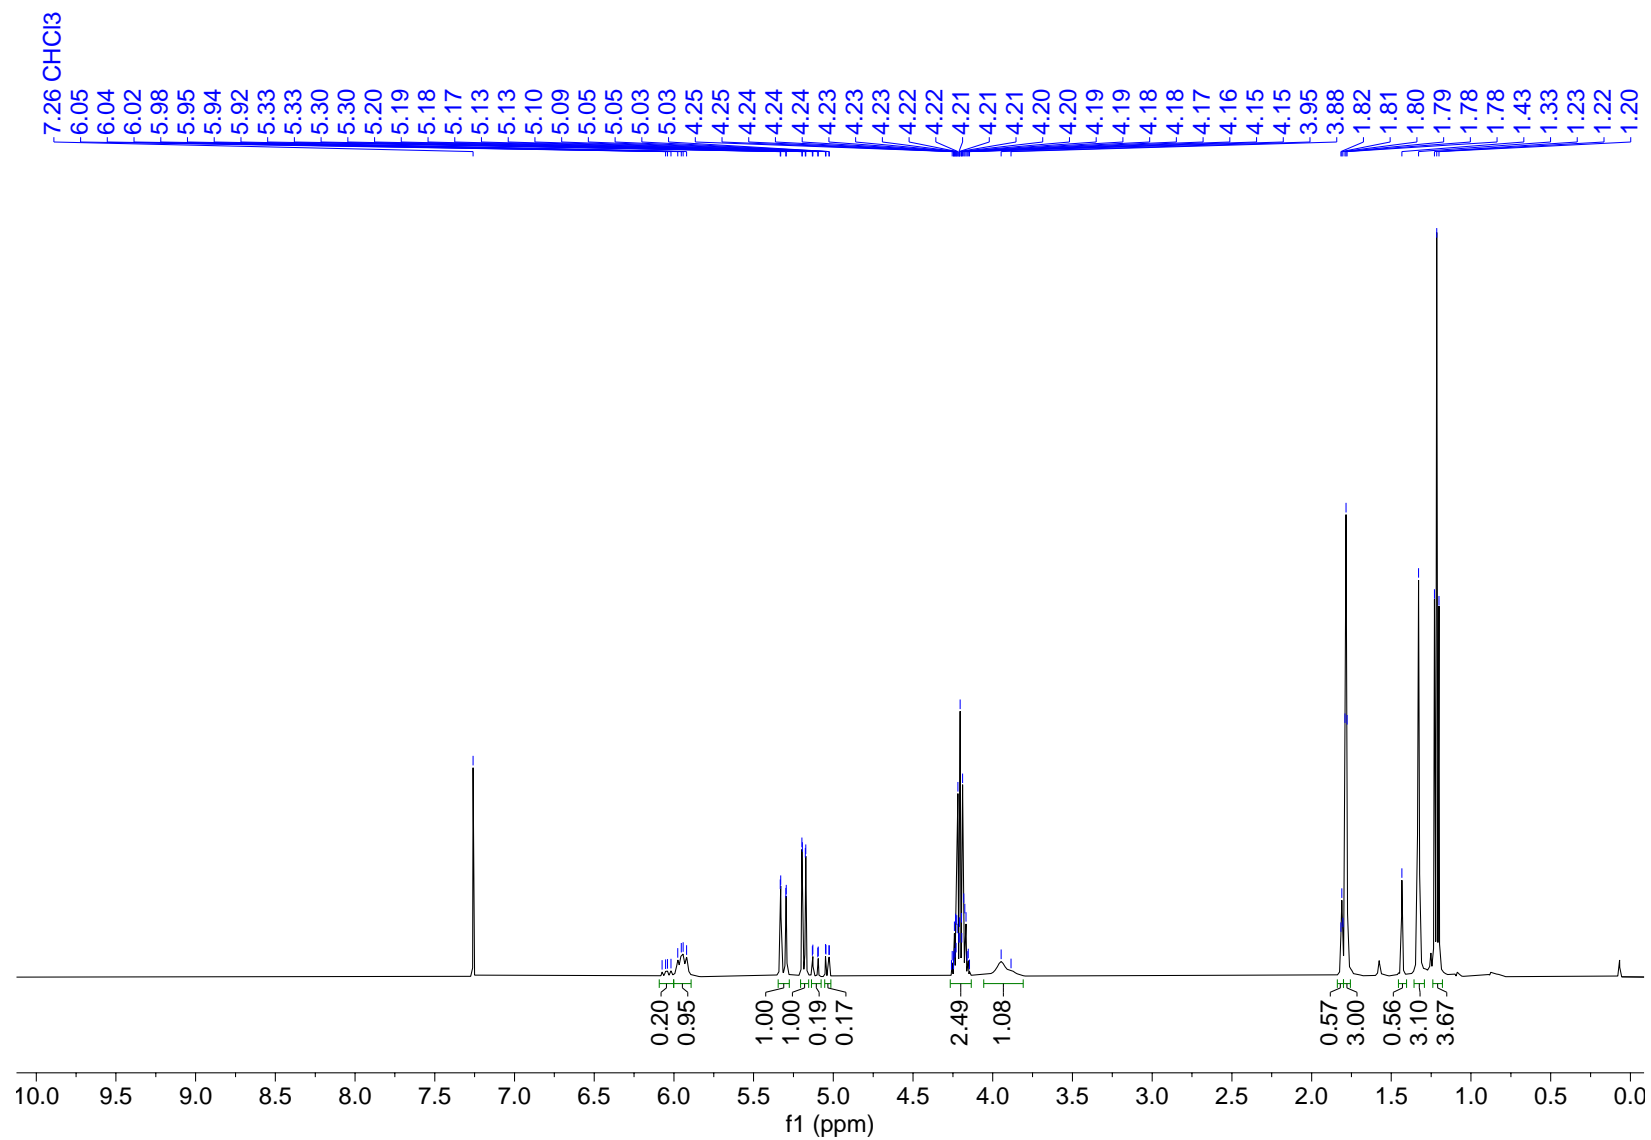

Figure S61:  $^{13}\text{C}$  NMR (125.8 MHz,  $\text{CDCl}_3$ , 298 K) spectrum of **2q**.

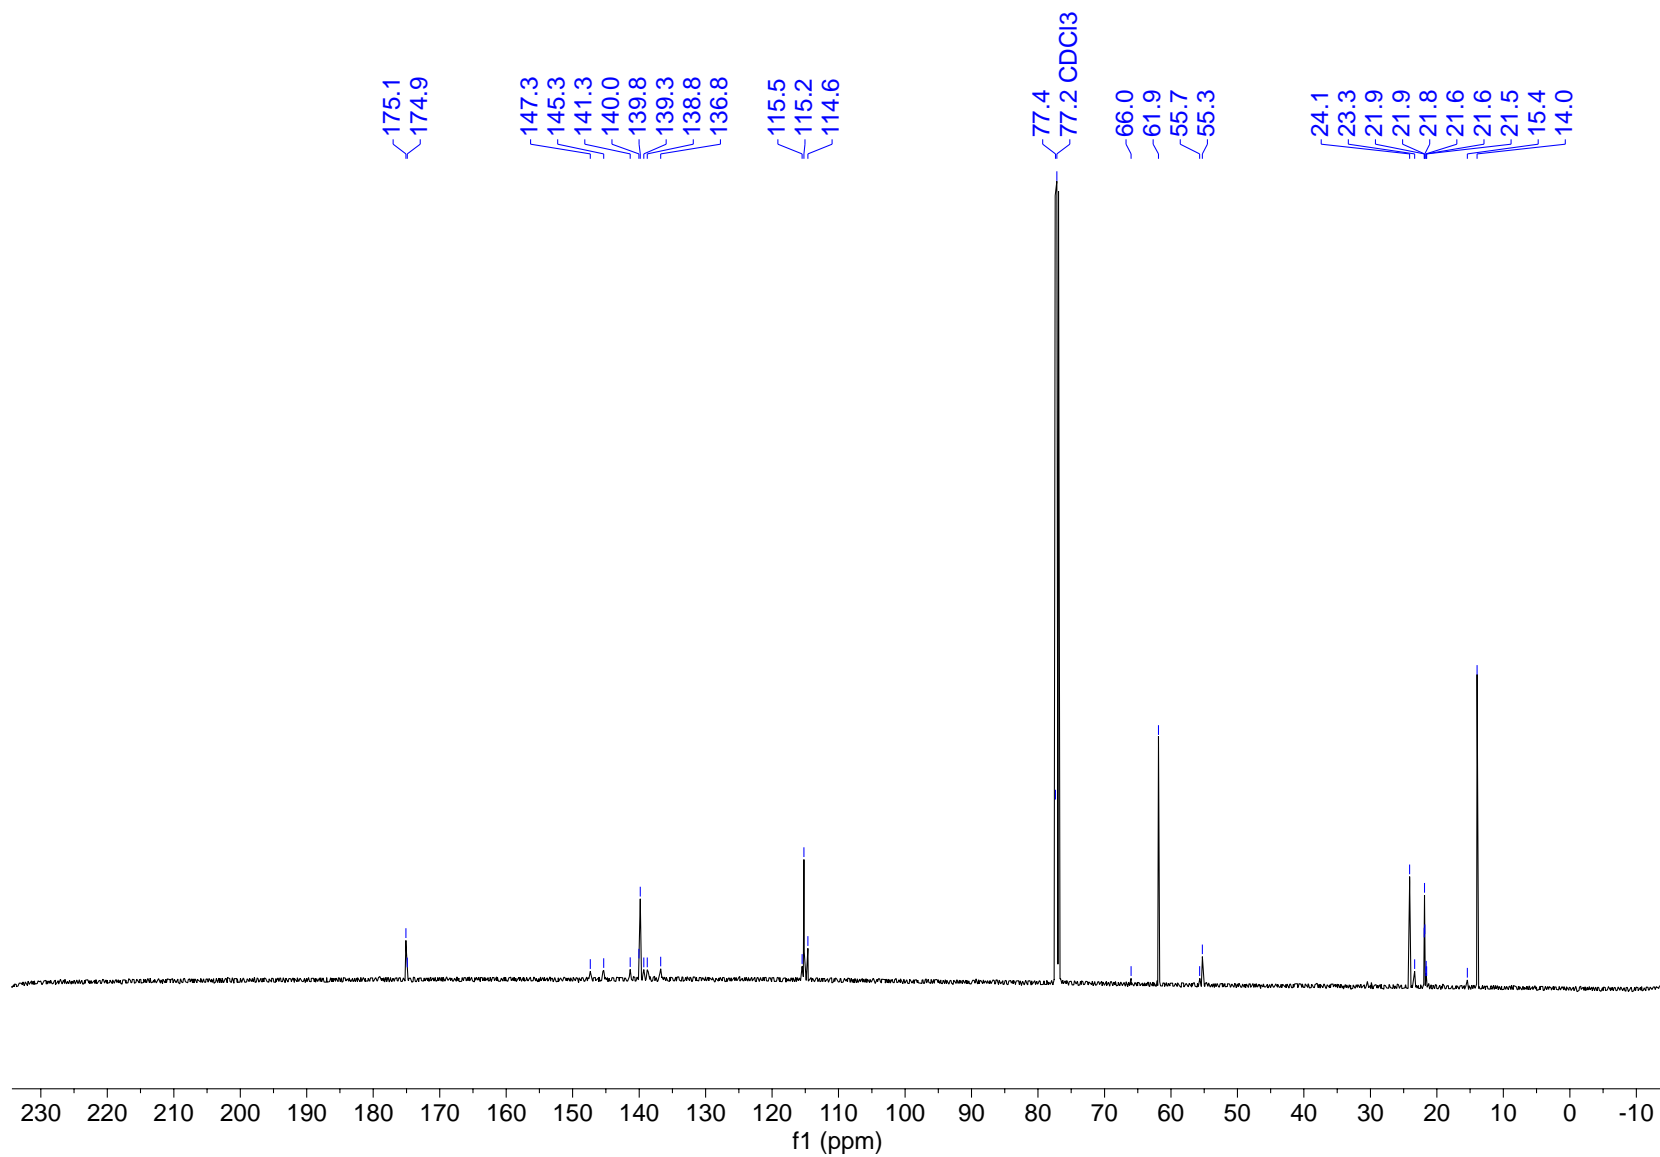

Figure S62:  $^{19}\text{F}$  NMR (470.2 MHz,  $\text{CDCl}_3$ , 298 K) spectrum of **2q**.

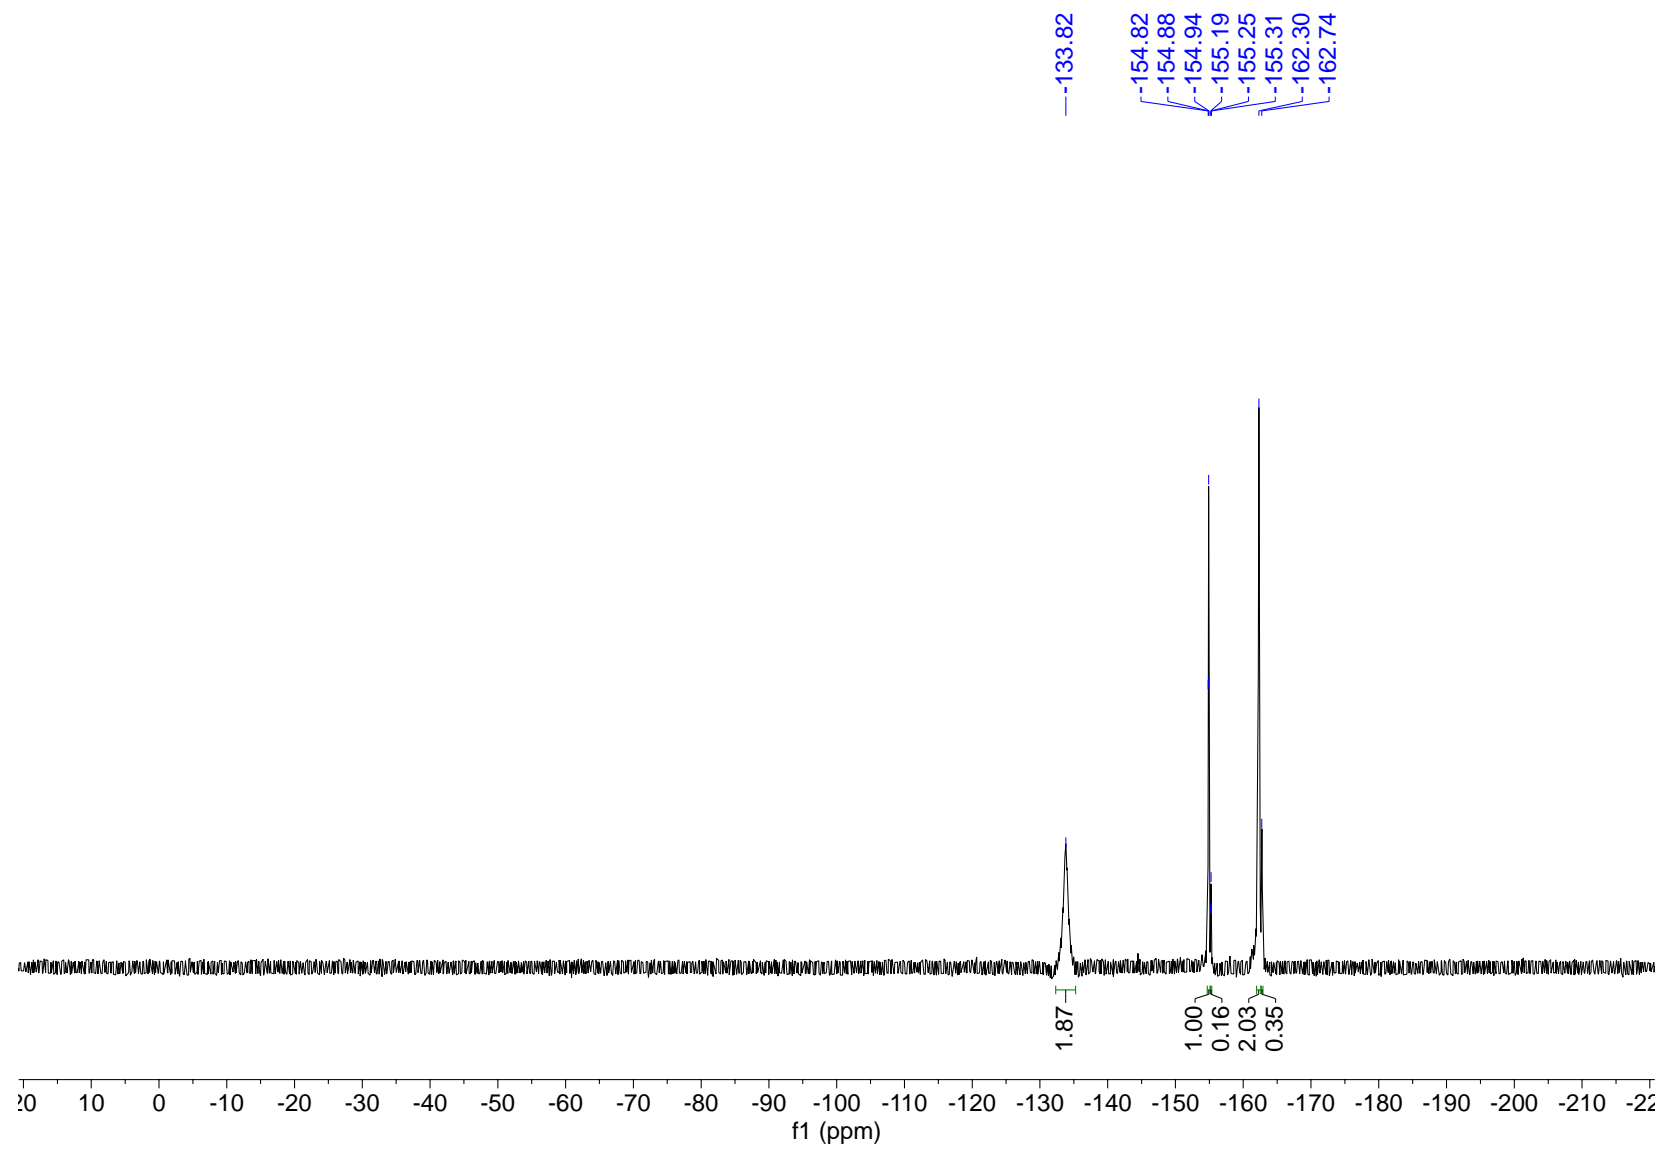



Figure S63:  $^1\text{H}$  NMR (500.2 MHz,  $\text{CDCl}_3$ , 298 K) spectrum of **3b**.

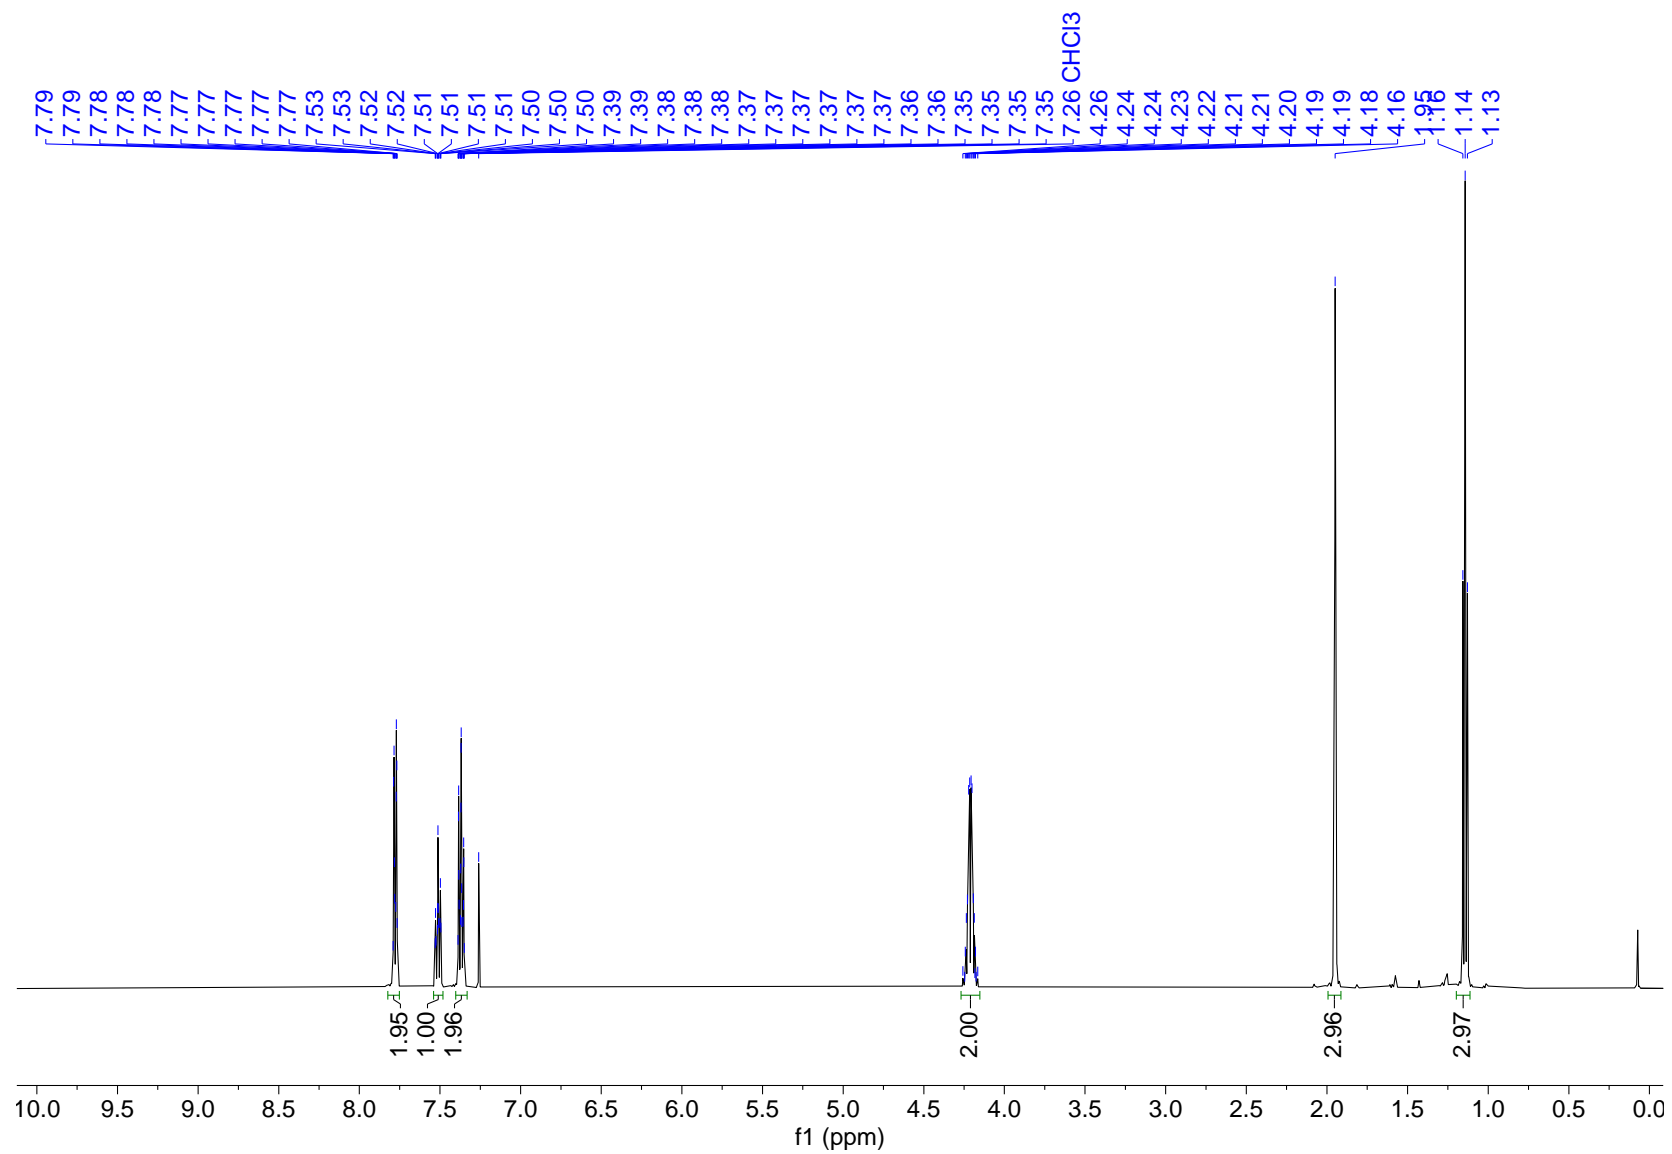

Figure S64:  $^{13}\text{C}$  NMR (125.8 MHz,  $\text{CDCl}_3$ , 298 K) spectrum of **3b**.

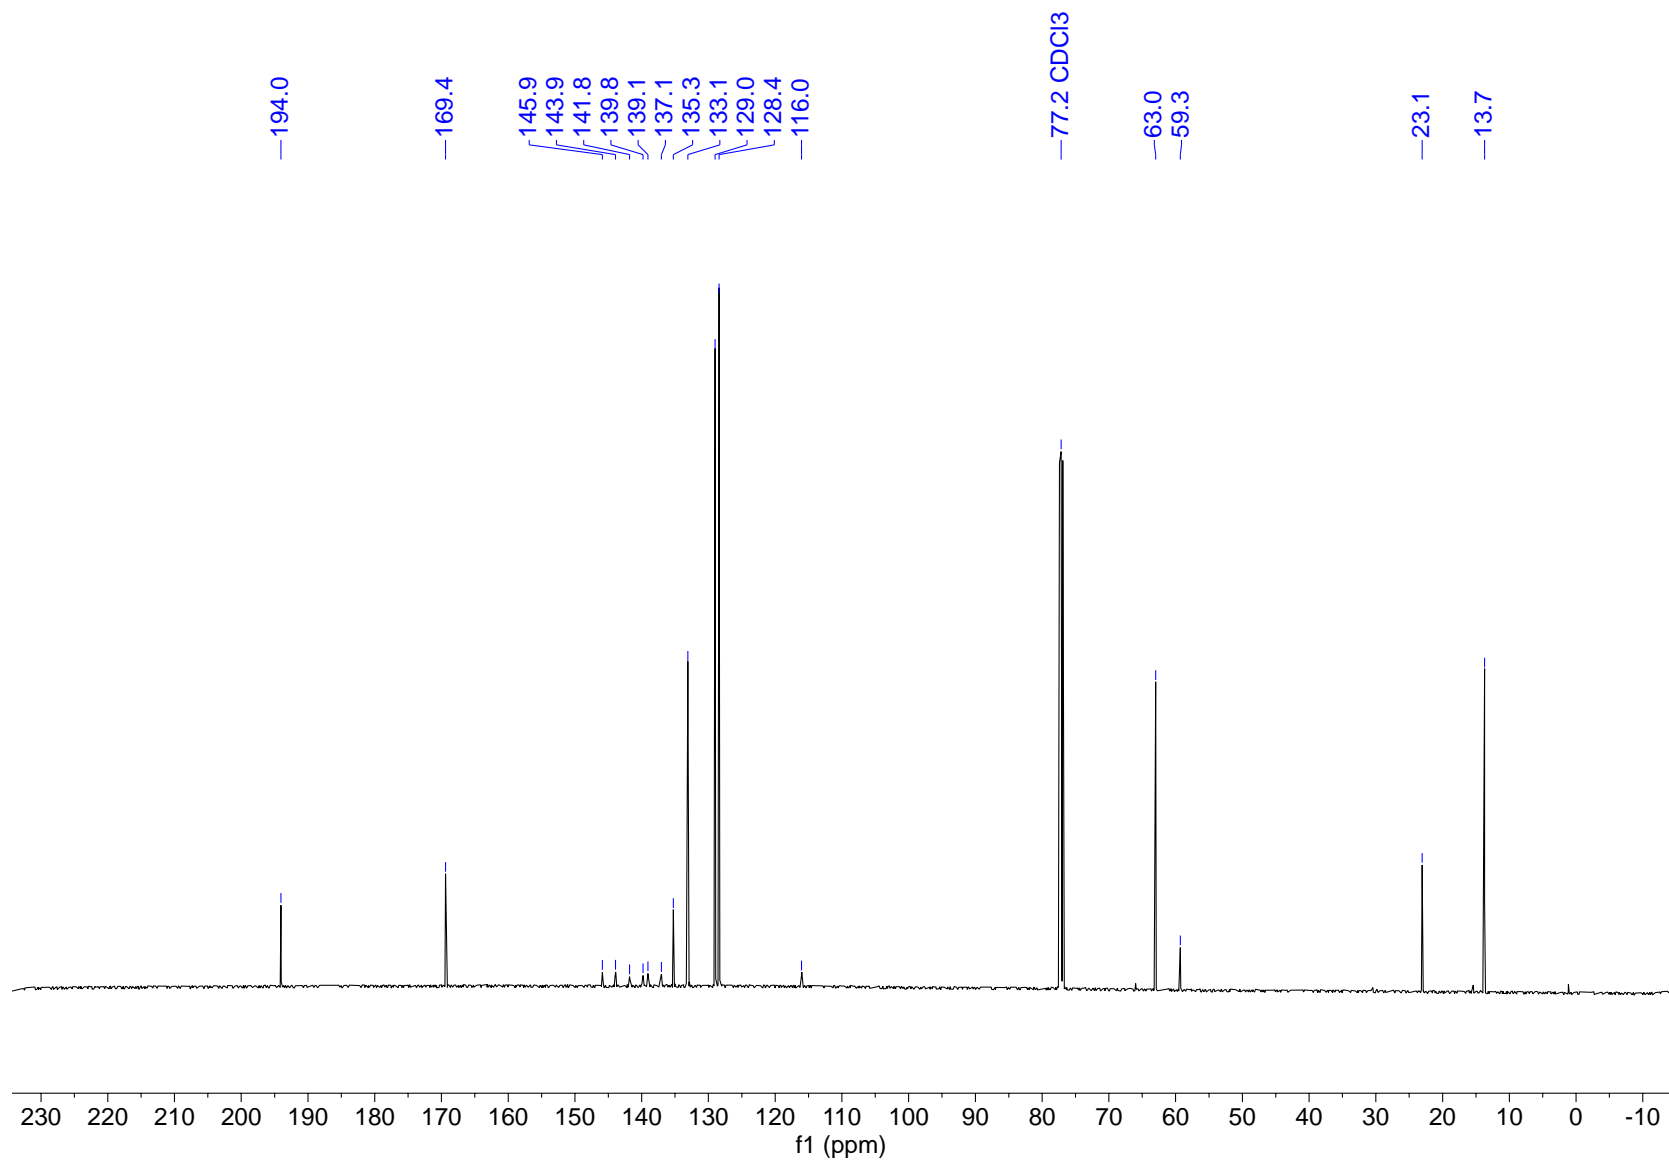

Figure S65:  $^{19}\text{F}$  NMR (470.2 MHz,  $\text{CDCl}_3$ , 298 K) spectrum of **3b**.

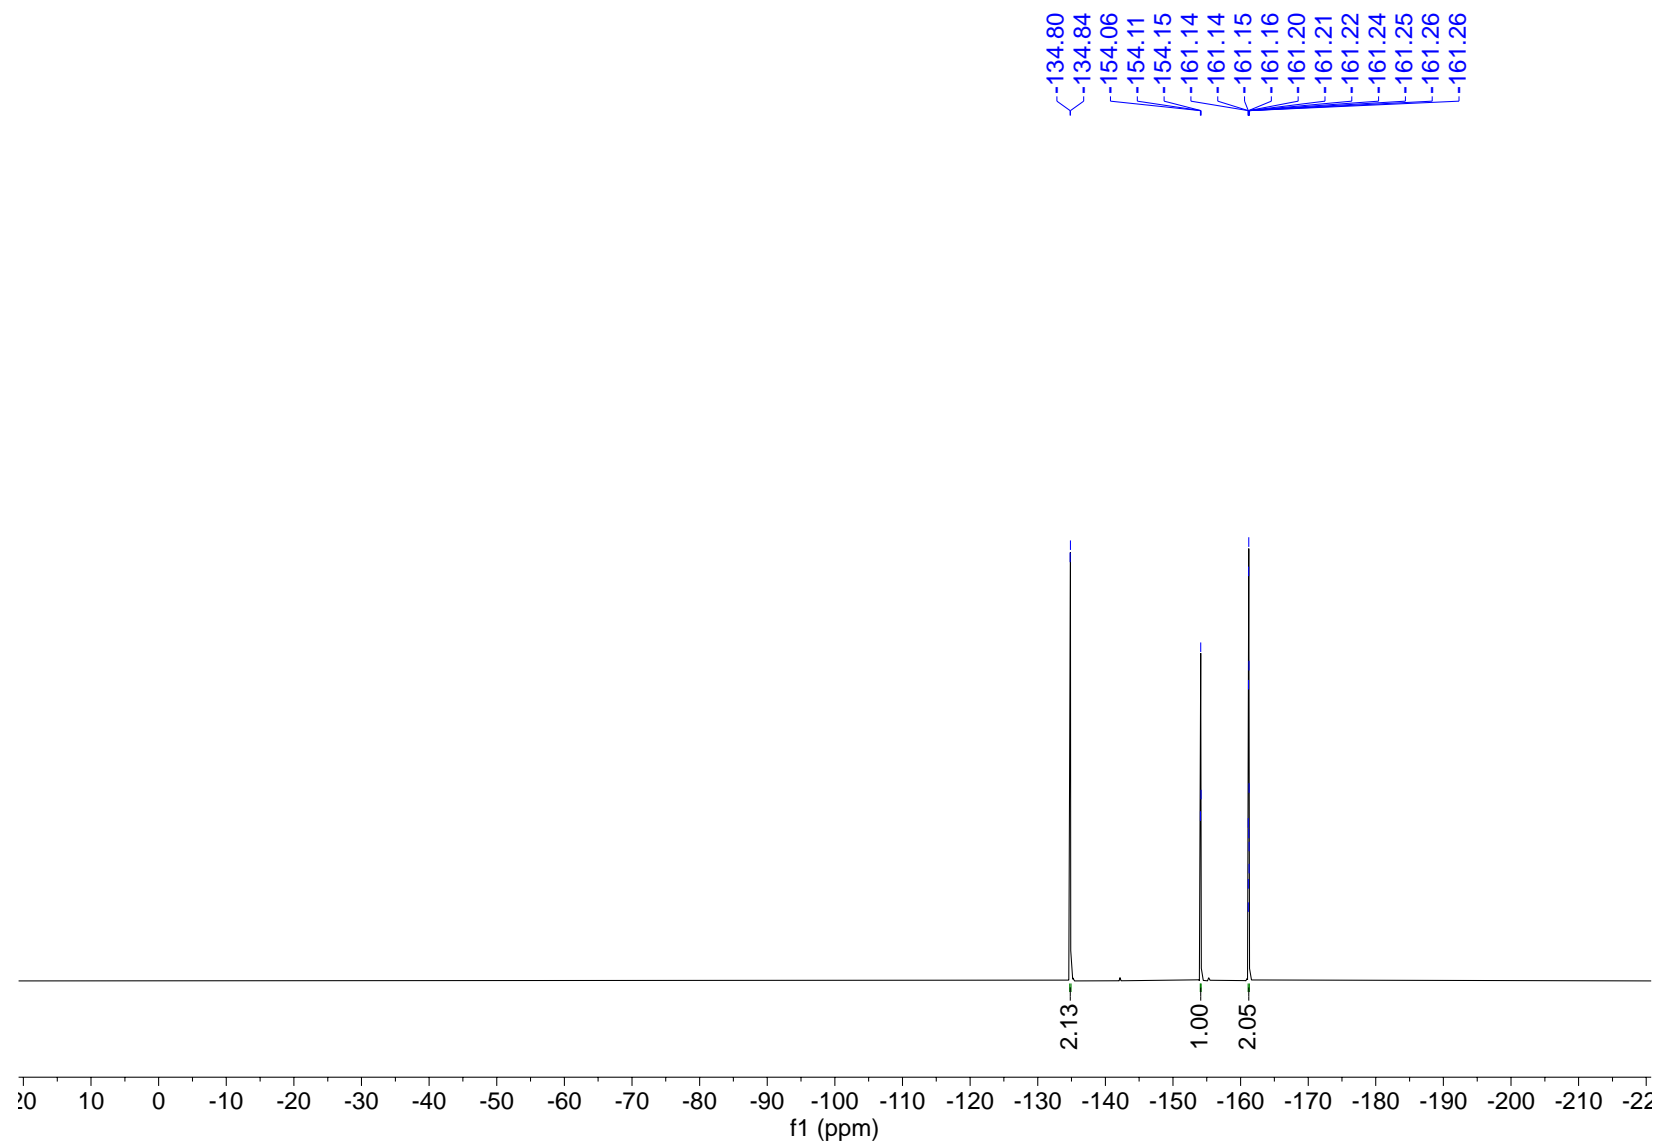

Figure S66:  $^1\text{H}$  NMR (500.2 MHz,  $\text{CDCl}_3$ , 298 K) spectrum of **3g**.

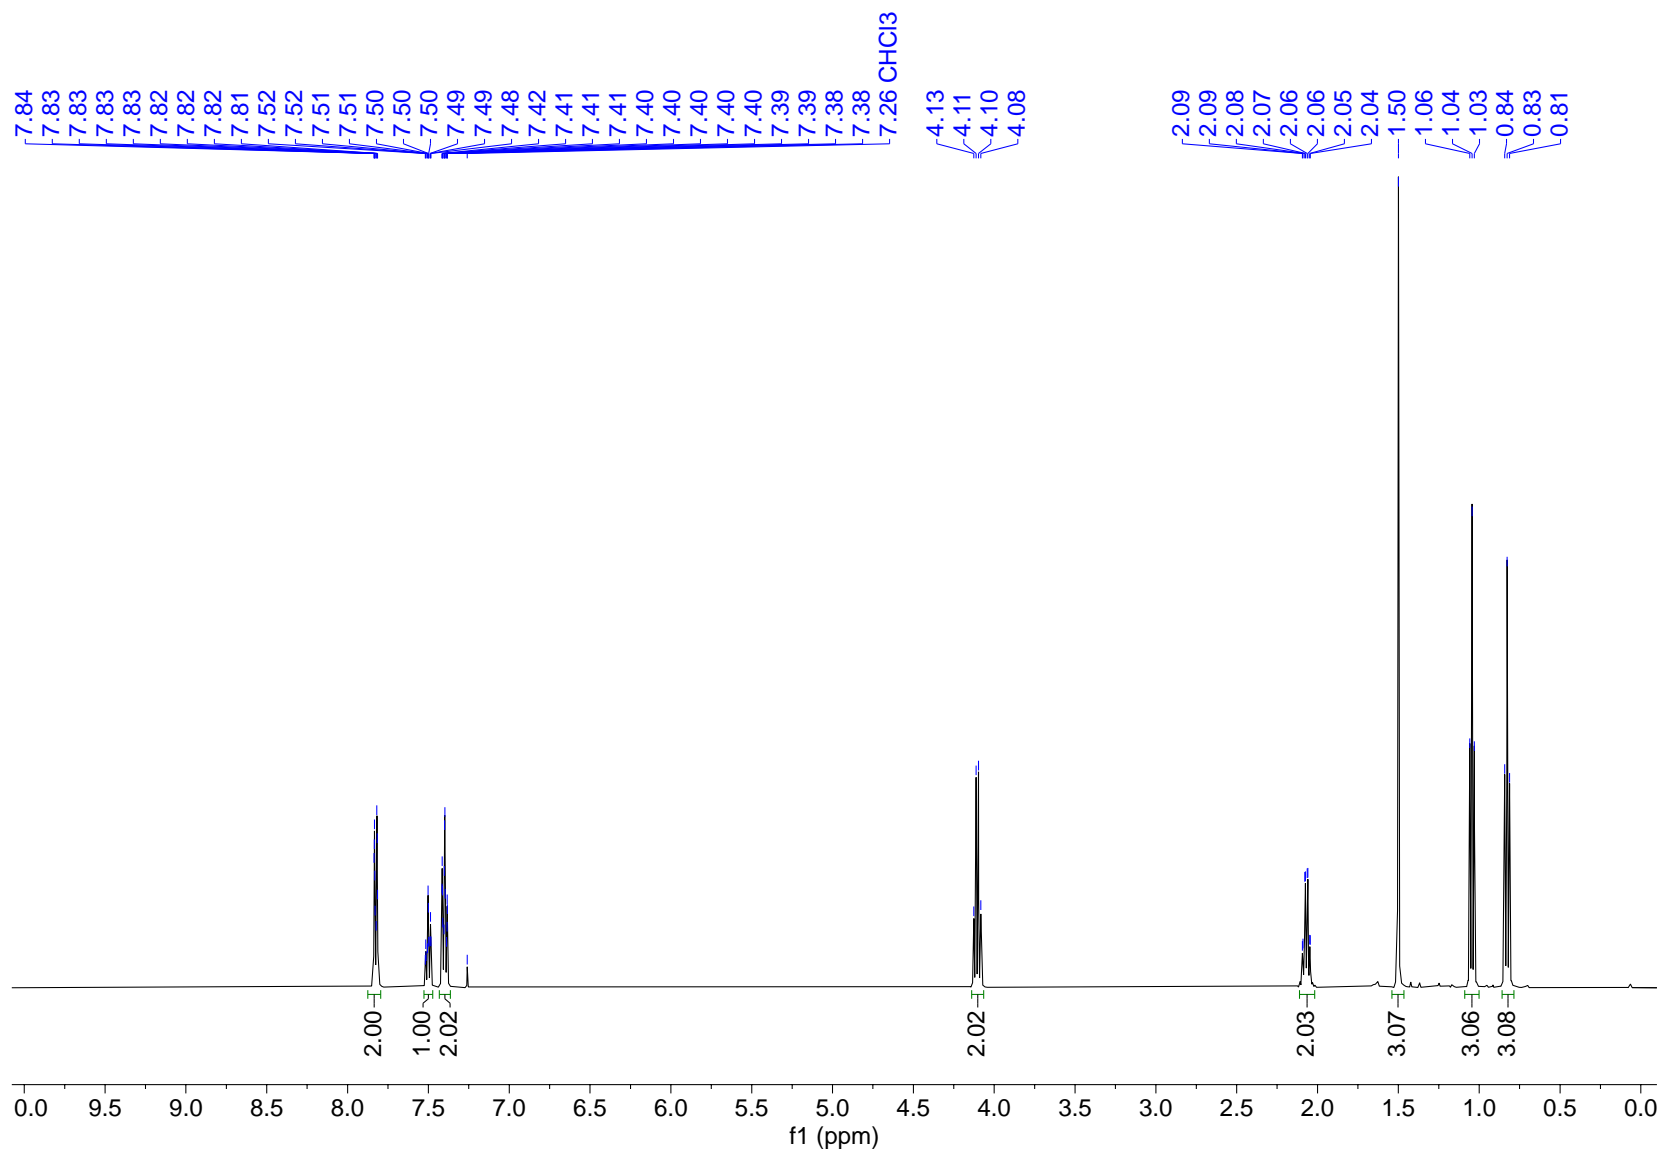

Figure S67:  $^{13}\text{C}$  NMR (125.8 MHz,  $\text{CDCl}_3$ , 298 K) spectrum of **3g**.

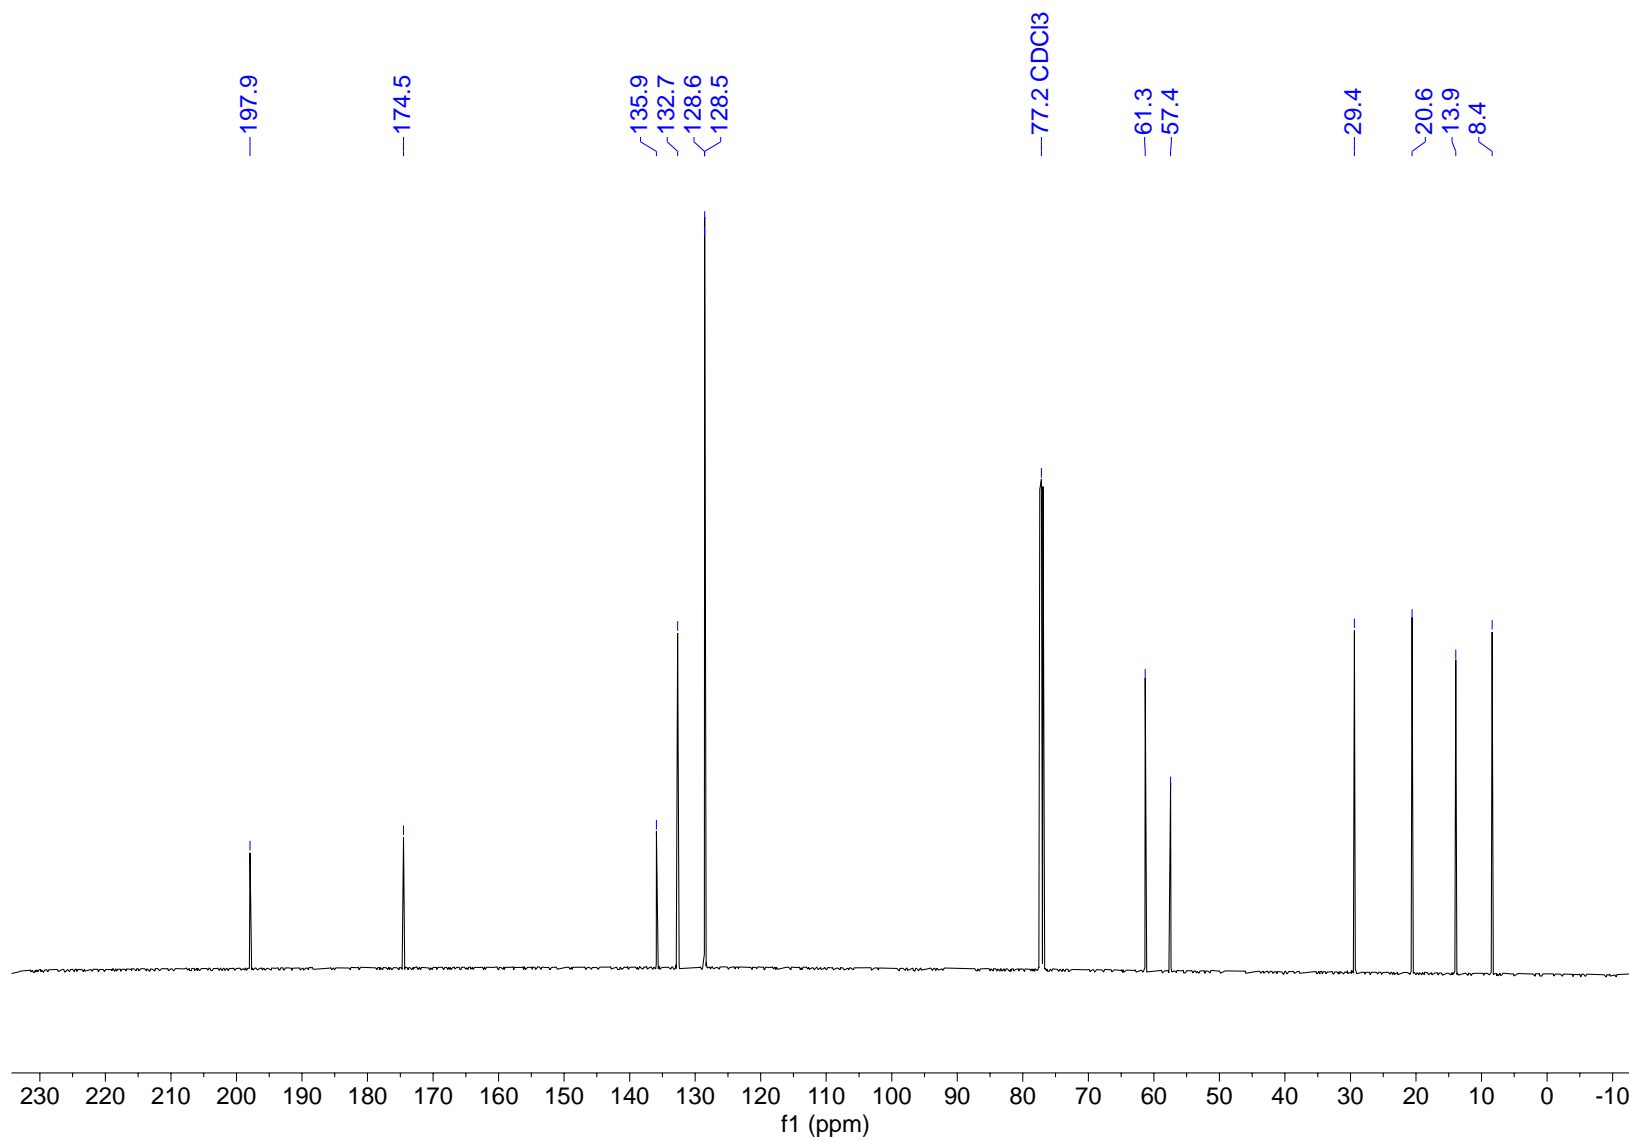

Figure S68:  $^1\text{H}$  NMR (500.2 MHz,  $\text{CDCl}_3$ , 298 K) spectrum of **3c**. Note: **3c** is decomposing quickly in solution. Additional signals are those of decomposition products.

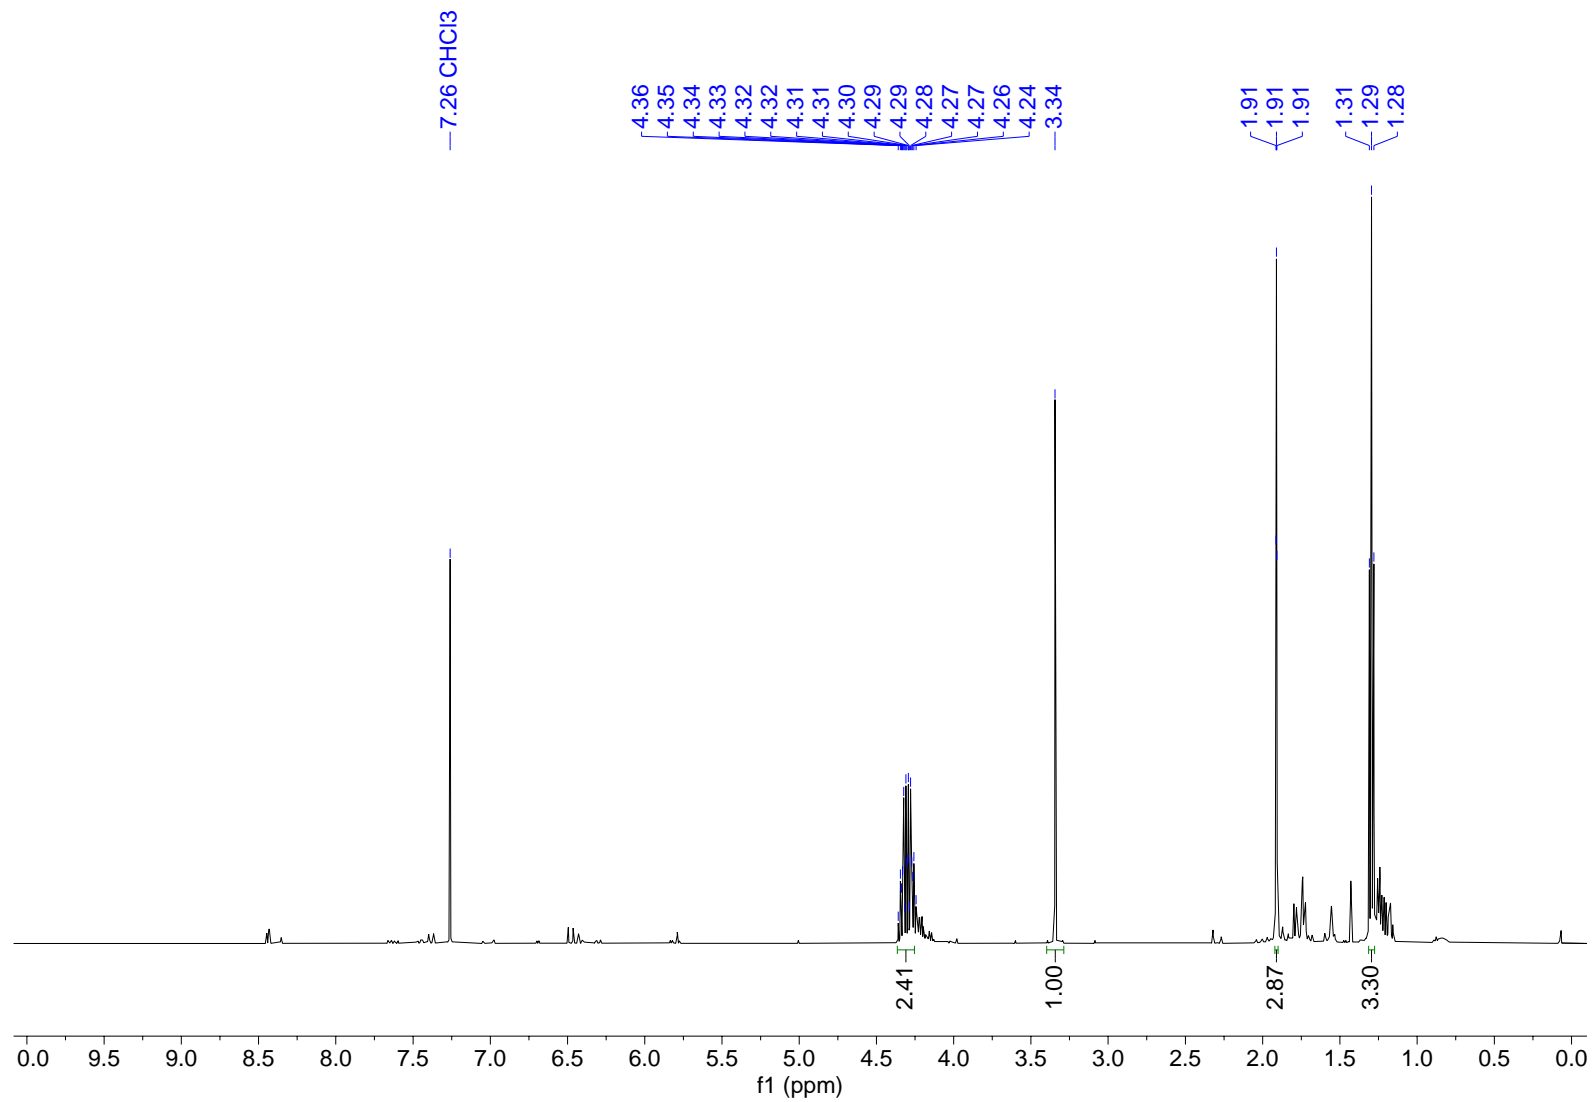

Figure S69:  $^{13}\text{C}$  NMR (125.8 MHz,  $\text{CDCl}_3$ , 298 K) spectrum of **3c**. Note: **3c** is decomposing quickly in solution. Additional signals are those of decomposition products.

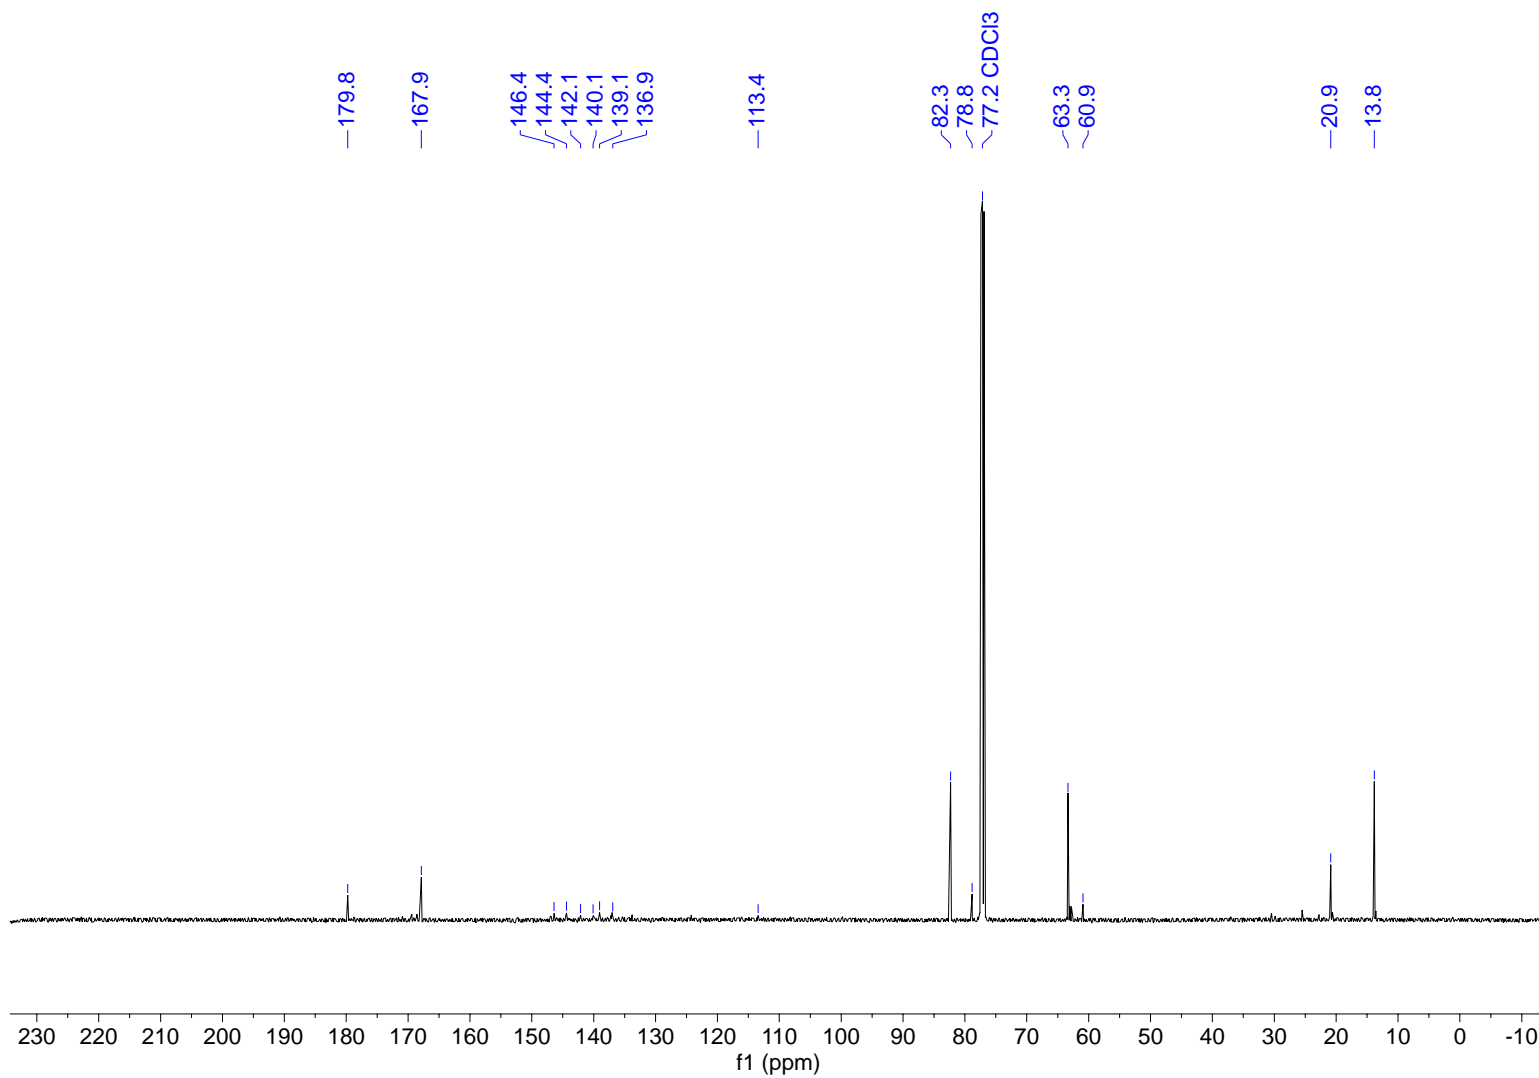

Figure S70:  $^{19}\text{F}$  NMR (470.2 MHz,  $\text{CDCl}_3$ , 298 K) spectrum of **3c**. Note: **3c** is decomposing quickly in solution. Additional signals are those of decomposition products.

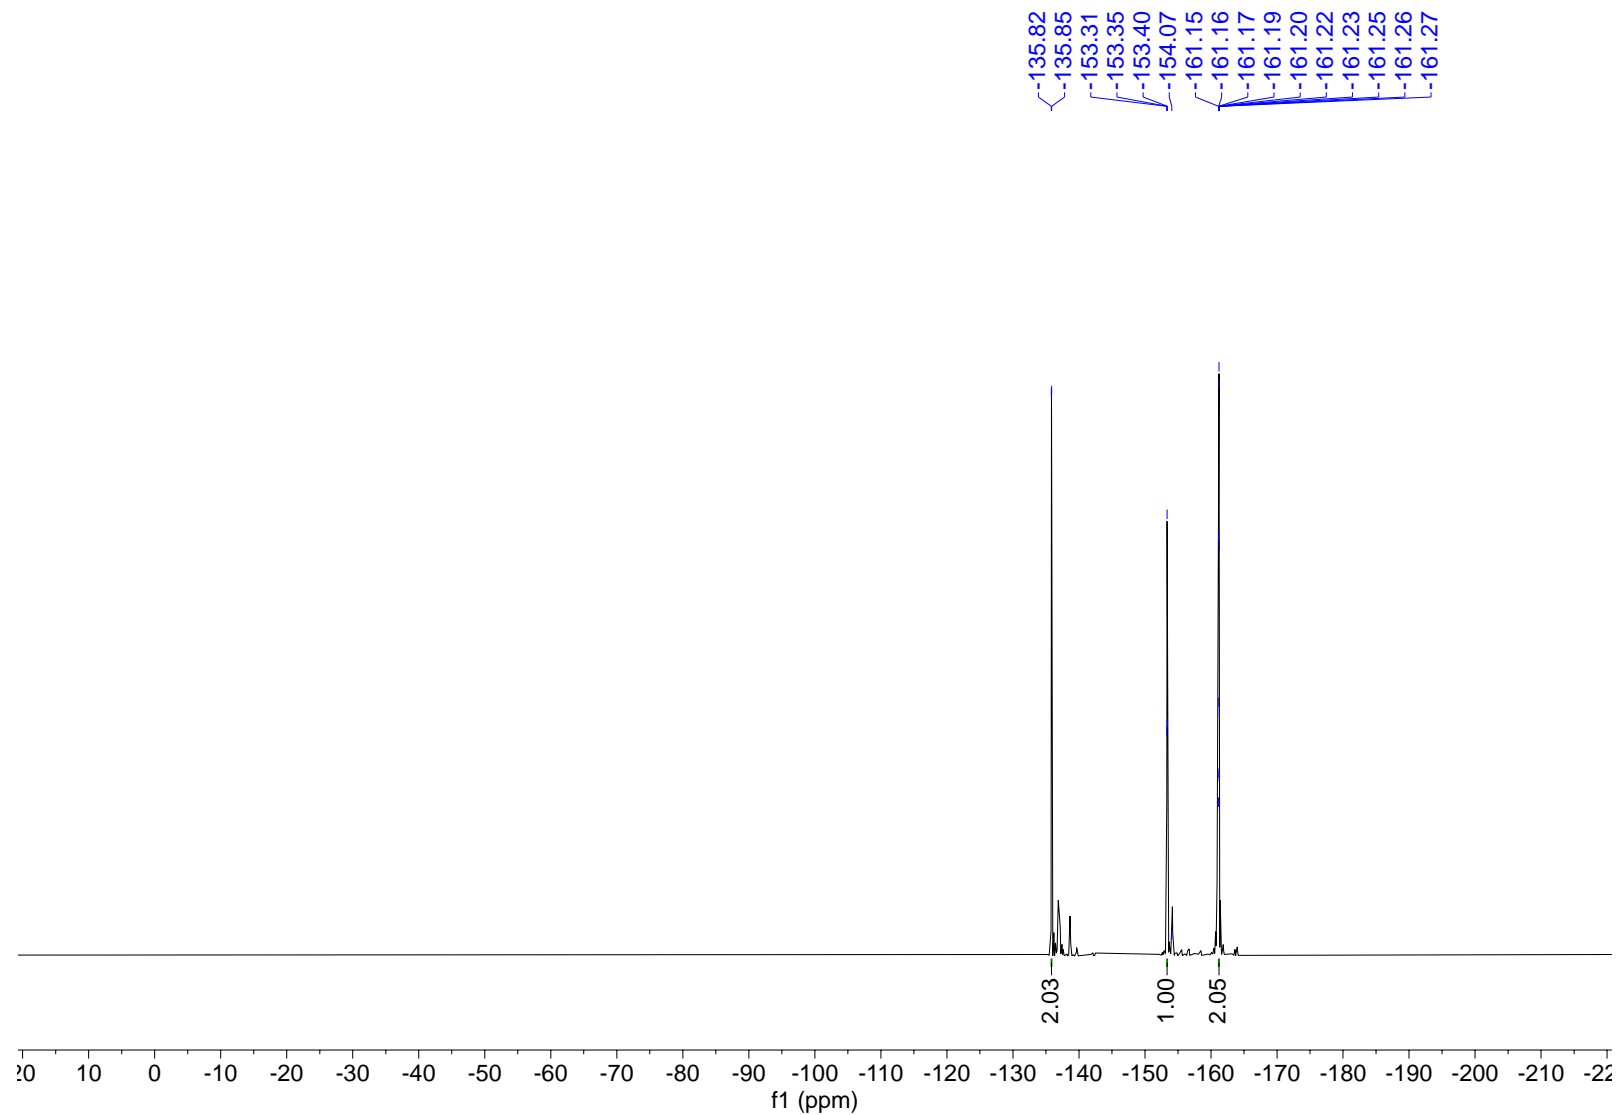



Figure S71:  $^1\text{H}$  NMR (500.2 MHz,  $\text{CDCl}_3$ , 298 K) spectrum of **3d**.

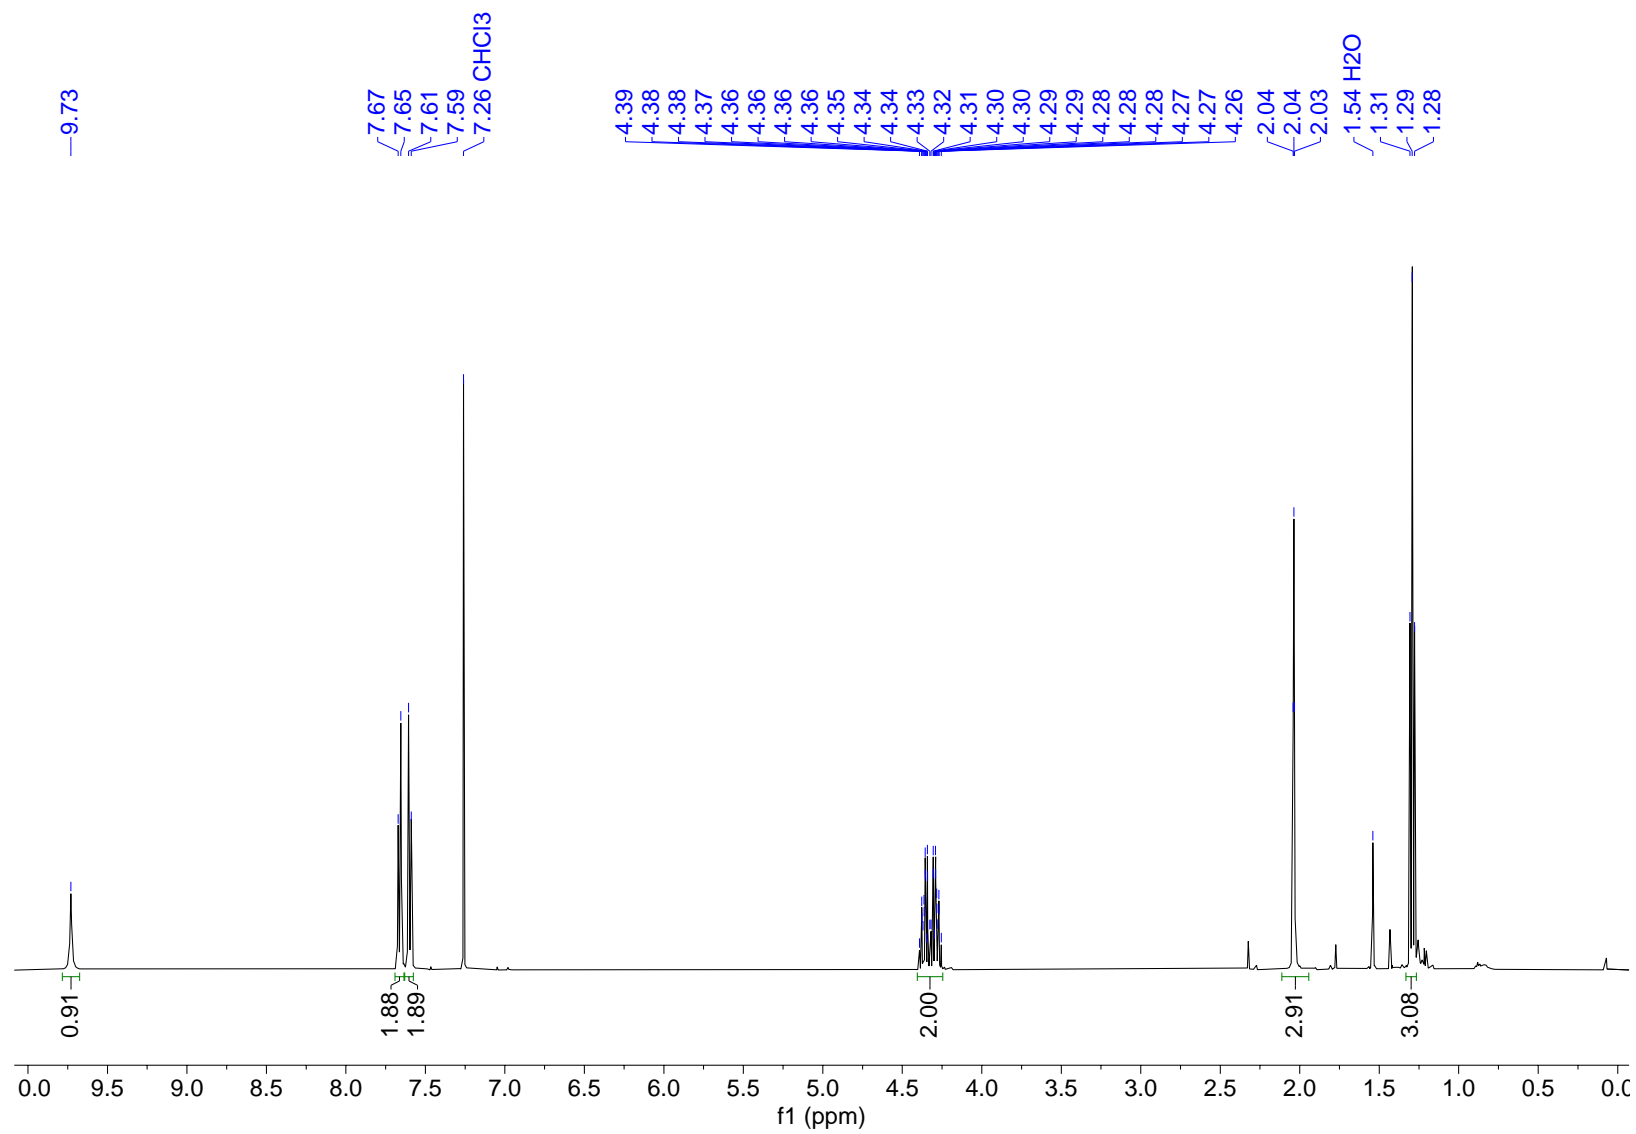

Figure S72:  $^{13}\text{C}$  NMR (125.8 MHz,  $\text{CDCl}_3$ , 298 K) spectrum of **3d**.

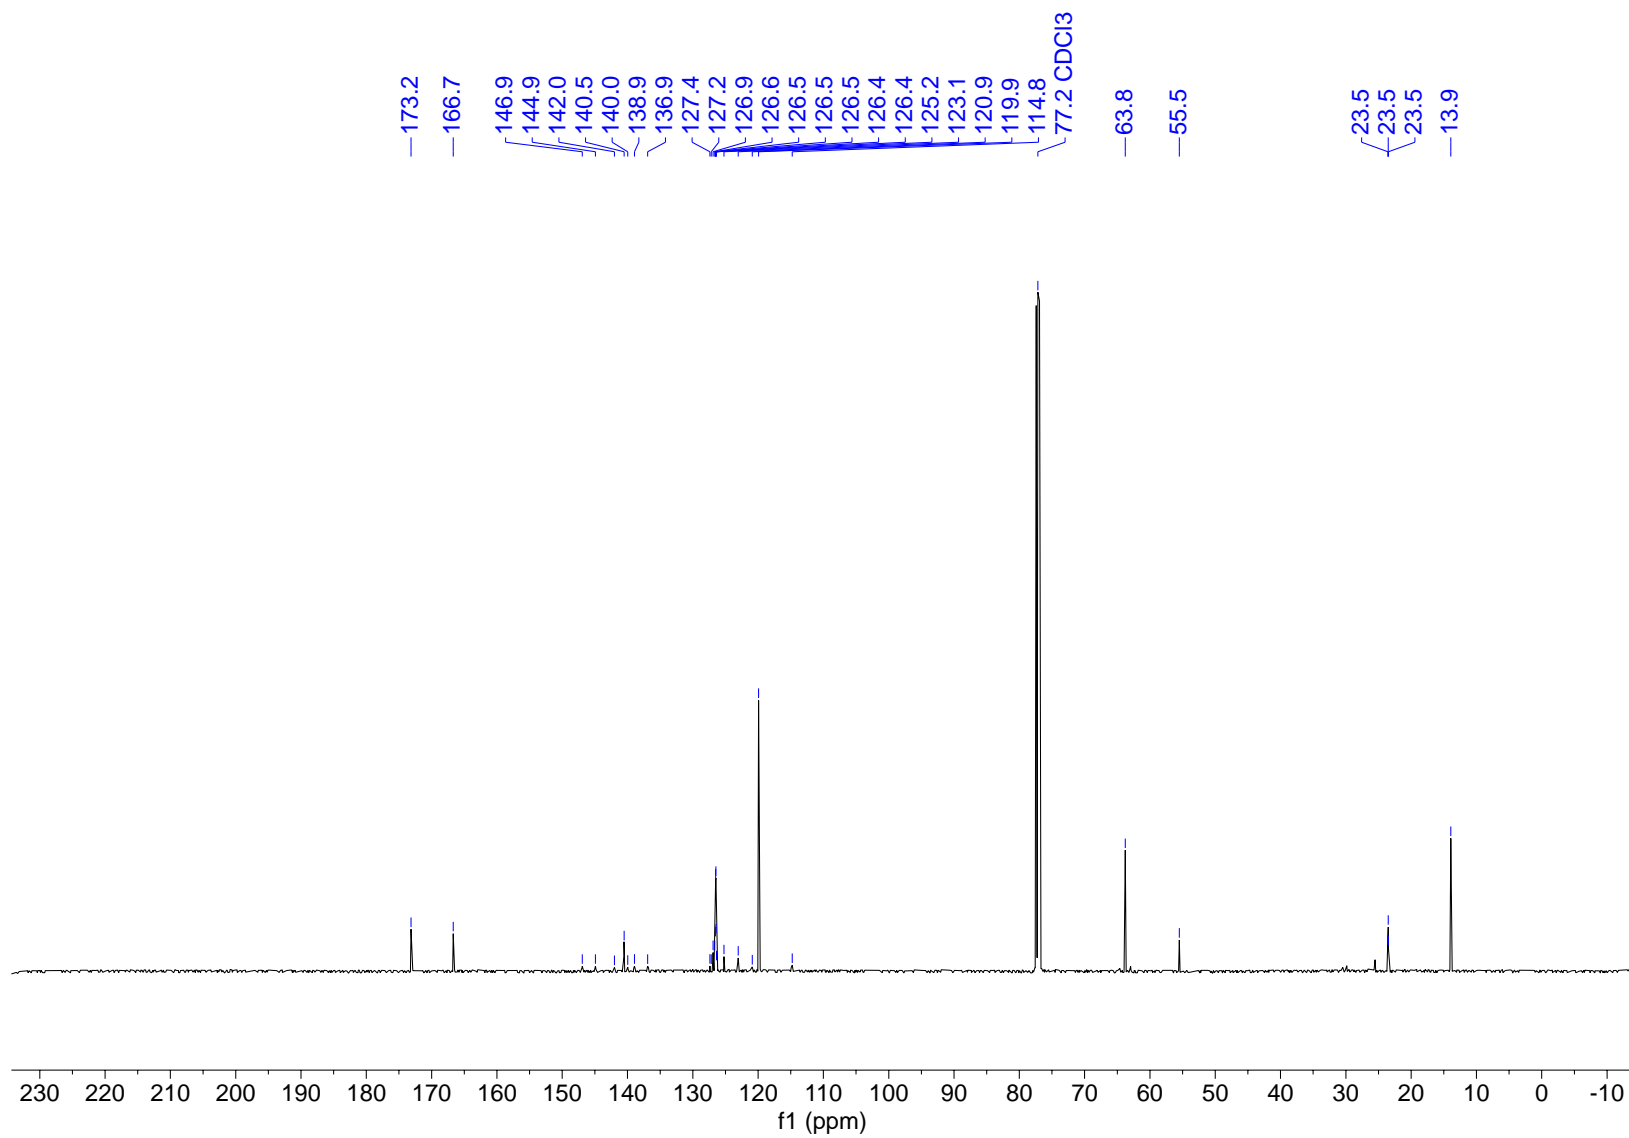

Figure S73:  $^{19}\text{F}$  NMR (470.2 MHz,  $\text{CDCl}_3$ , 298 K) spectrum of **3d**.

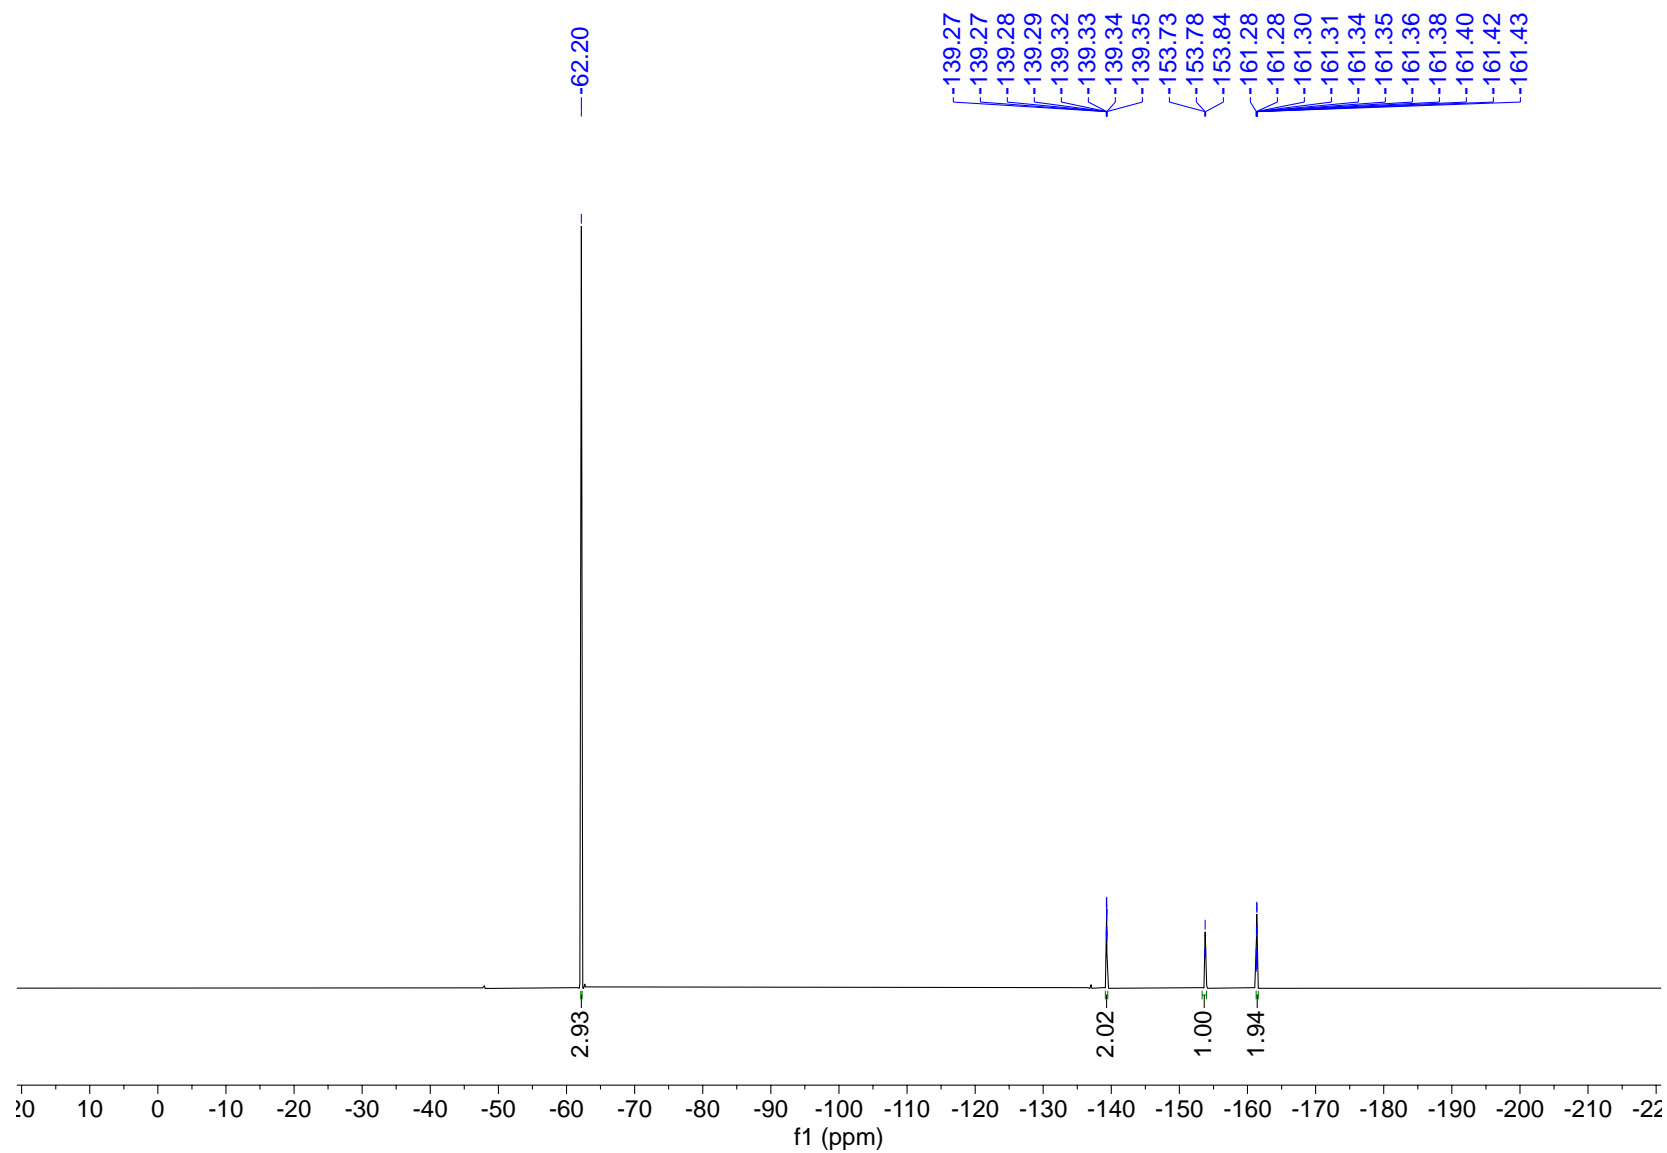

Figure S74:  $^1\text{H}$  NMR (500.2 MHz,  $\text{CDCl}_3$ , 298 K) spectrum of **3e**.

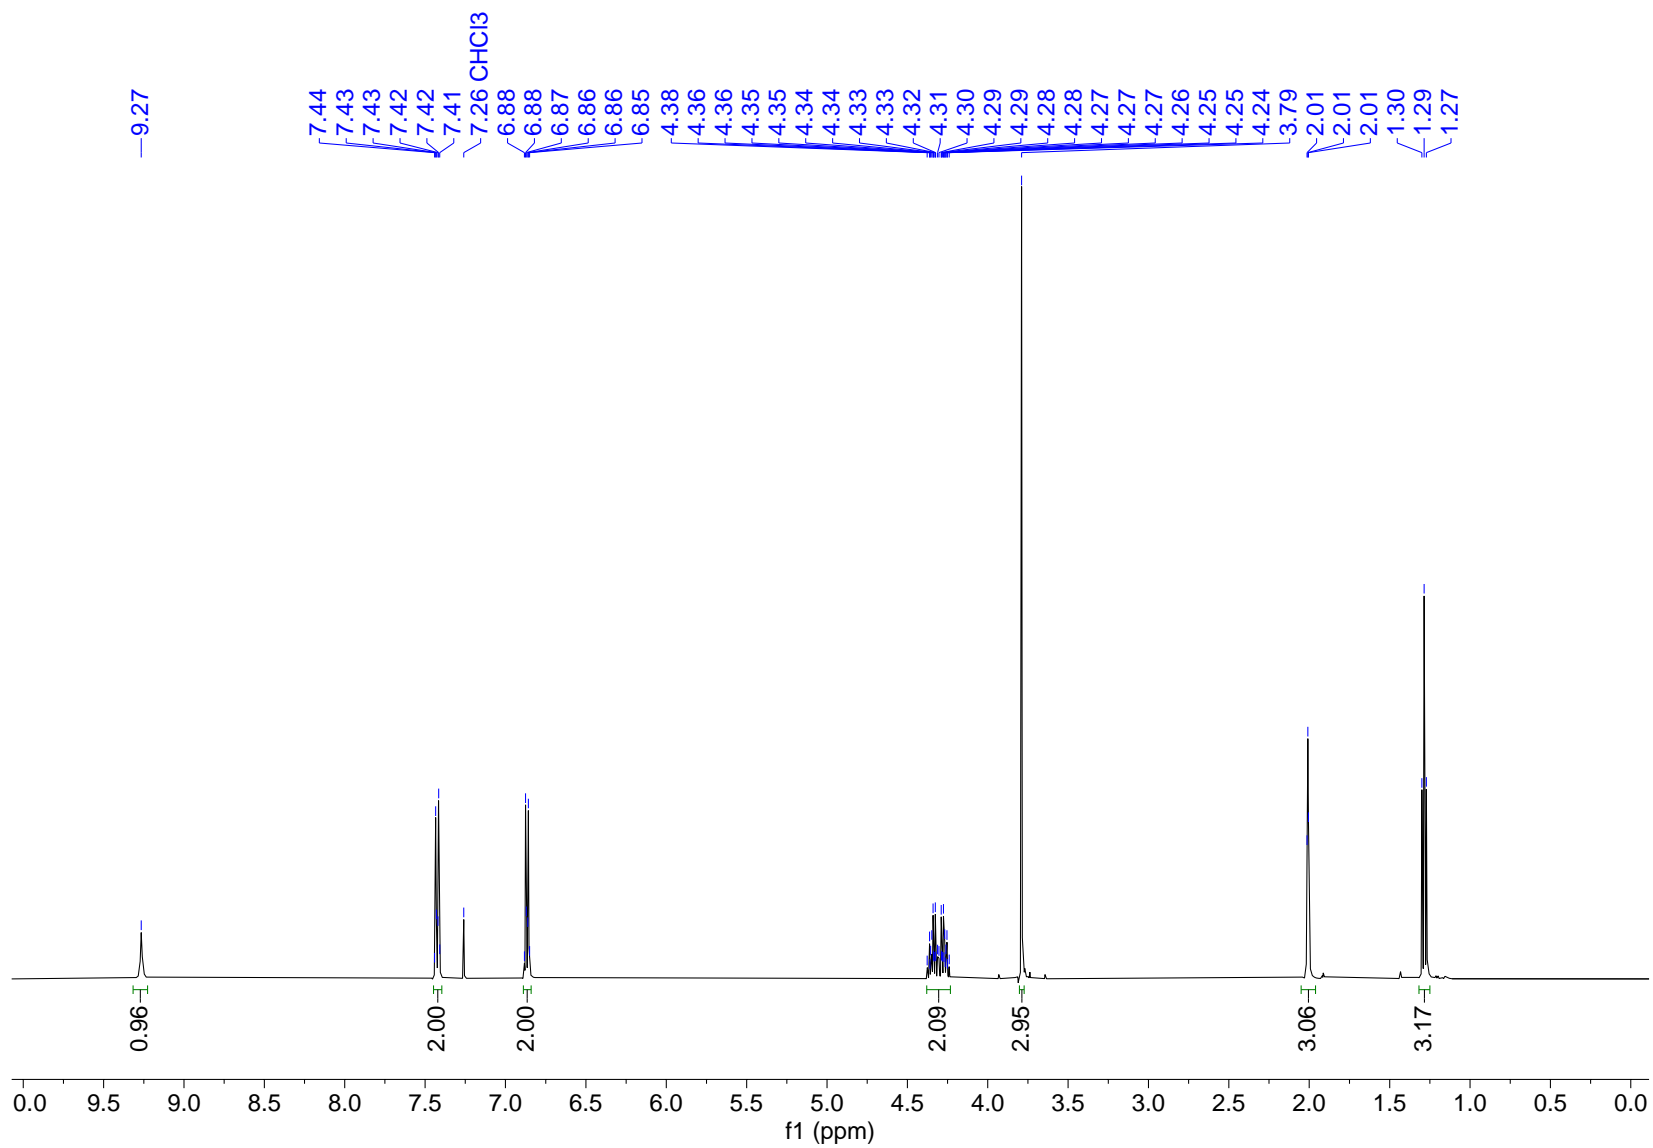

Figure S75:  $^{13}\text{C}$  NMR (125.8 MHz,  $\text{CDCl}_3$ , 298 K) spectrum of **3e**.

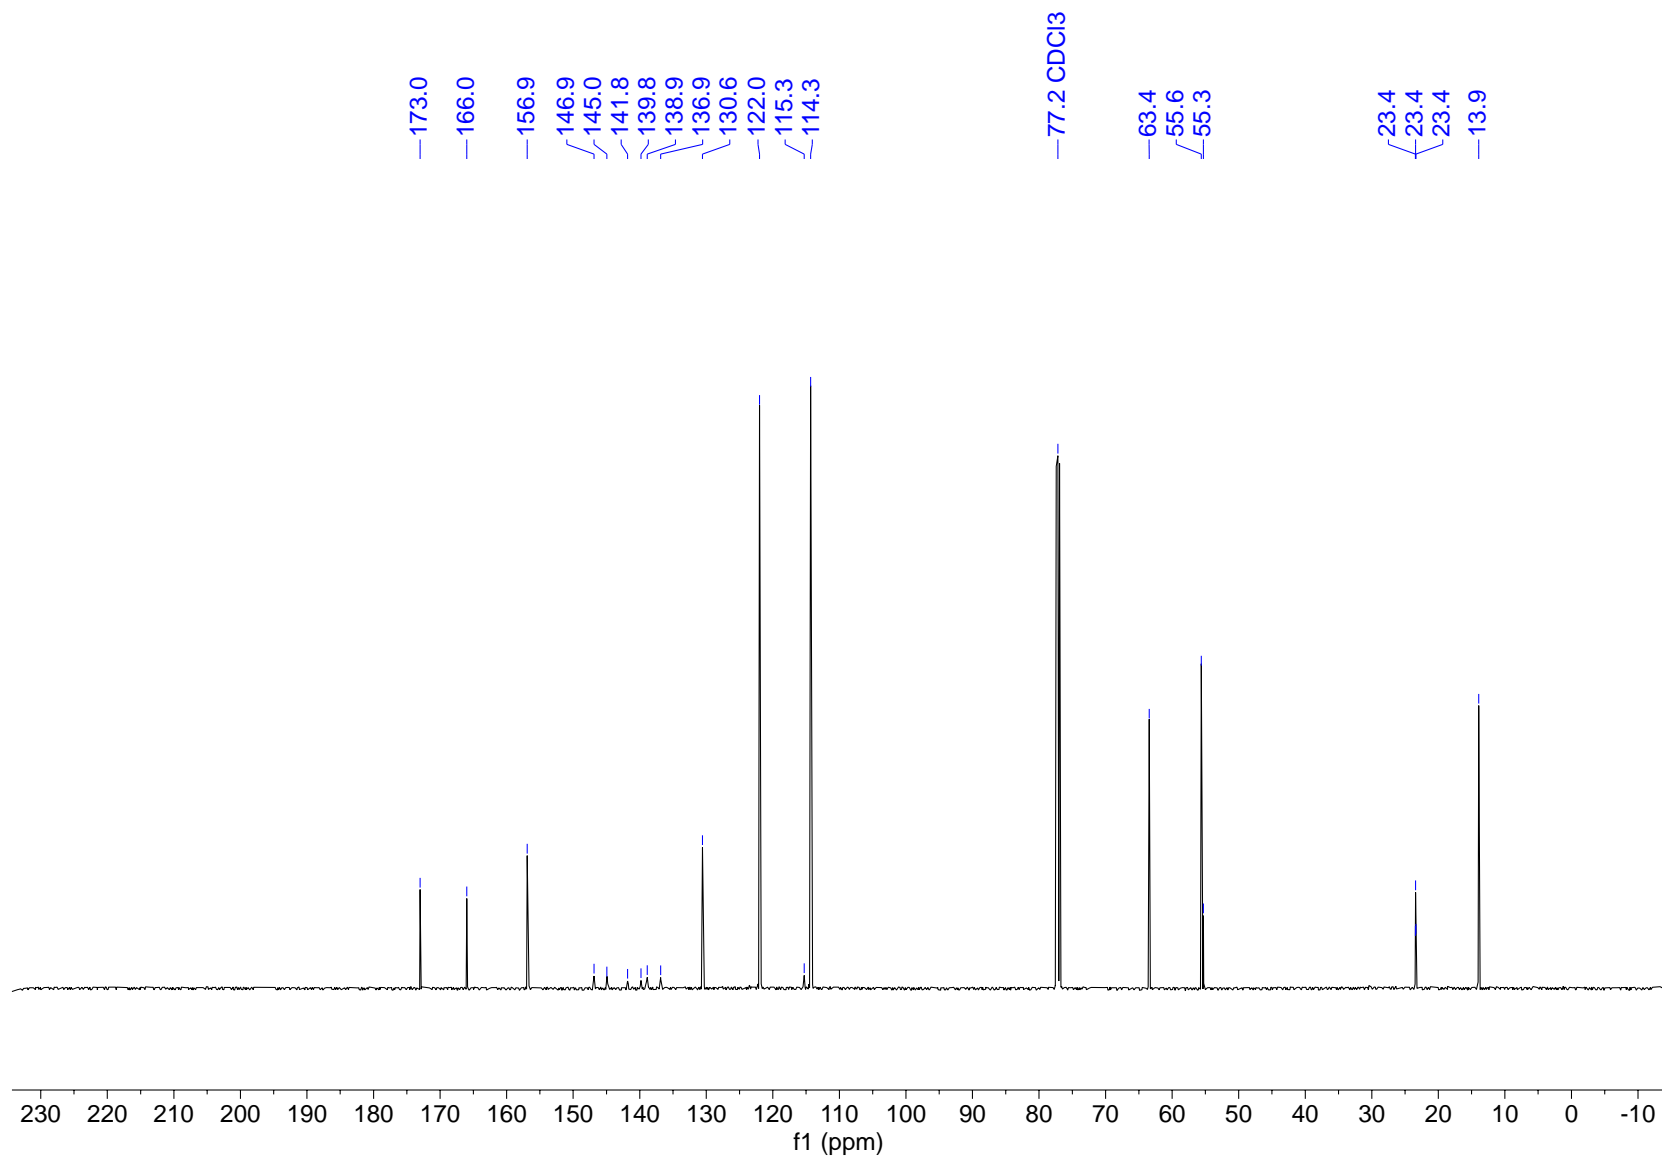

Figure S76:  $^{19}\text{F}$  NMR (470.2 MHz,  $\text{CDCl}_3$ , 298 K) spectrum of **3e**.

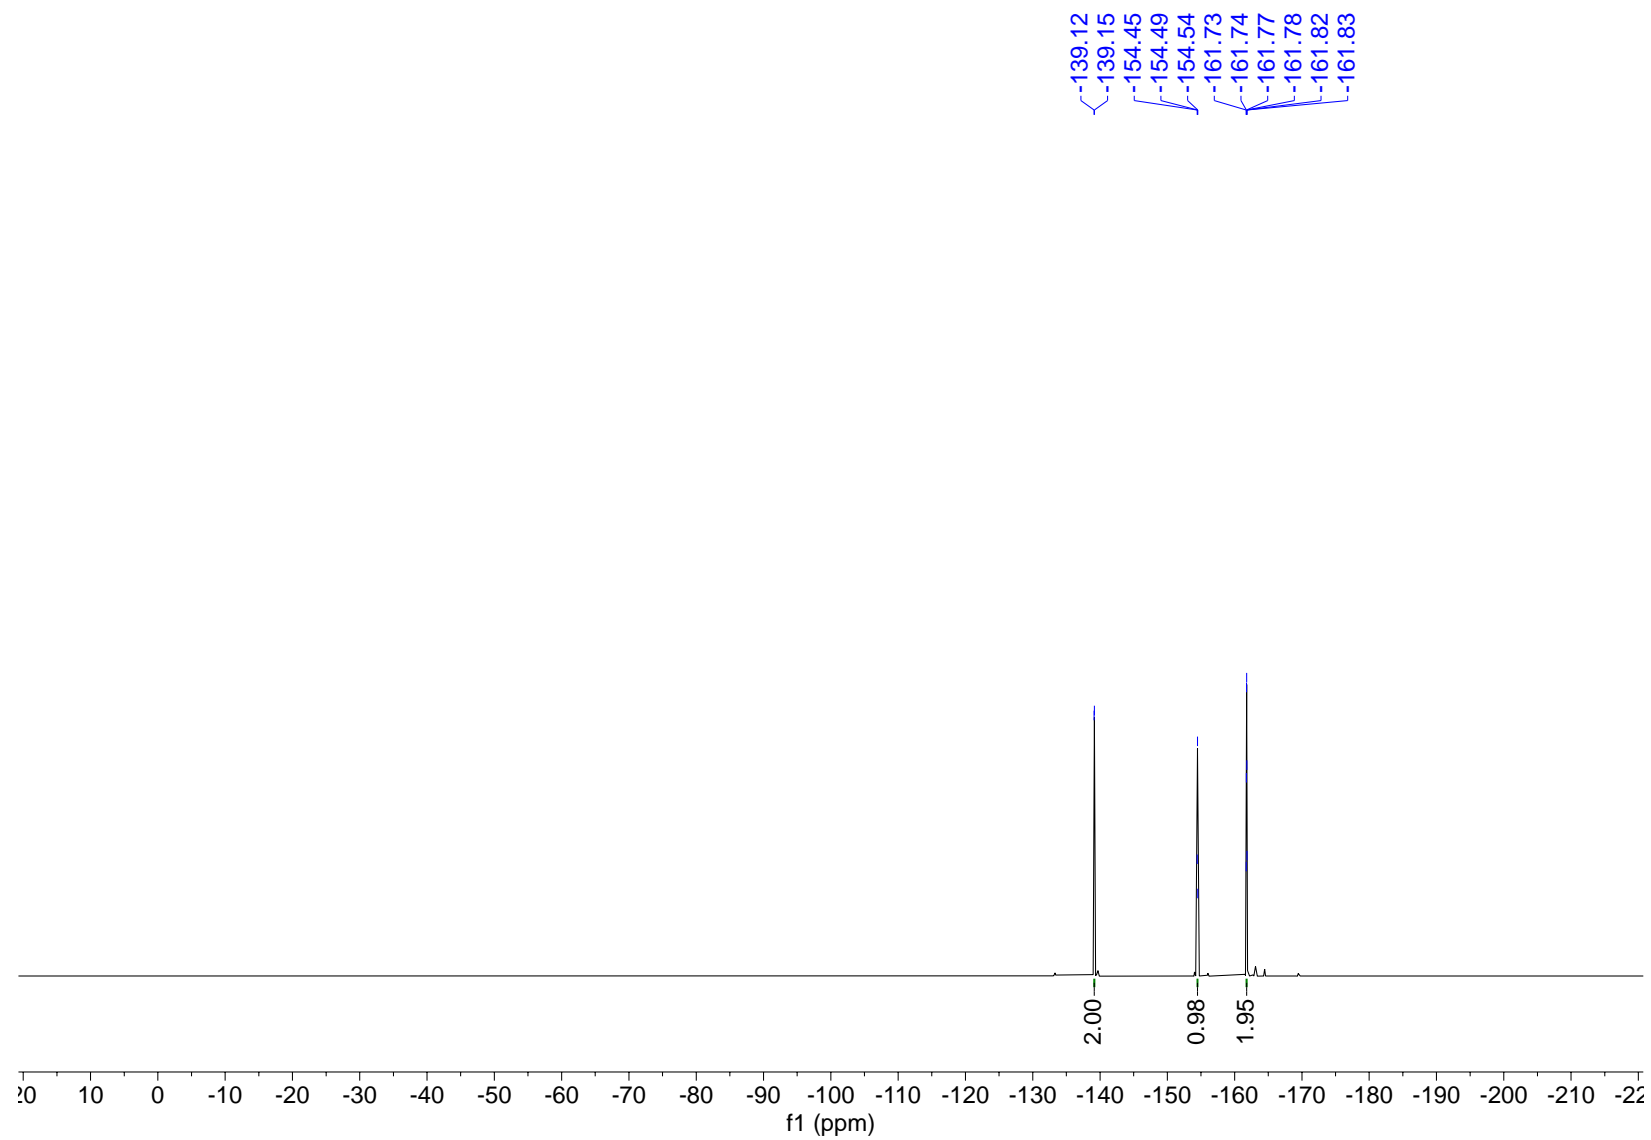

Figure S77:  $^1\text{H}$  NMR (500.2 MHz,  $\text{CDCl}_3$ , 298 K) spectrum of **3h**.

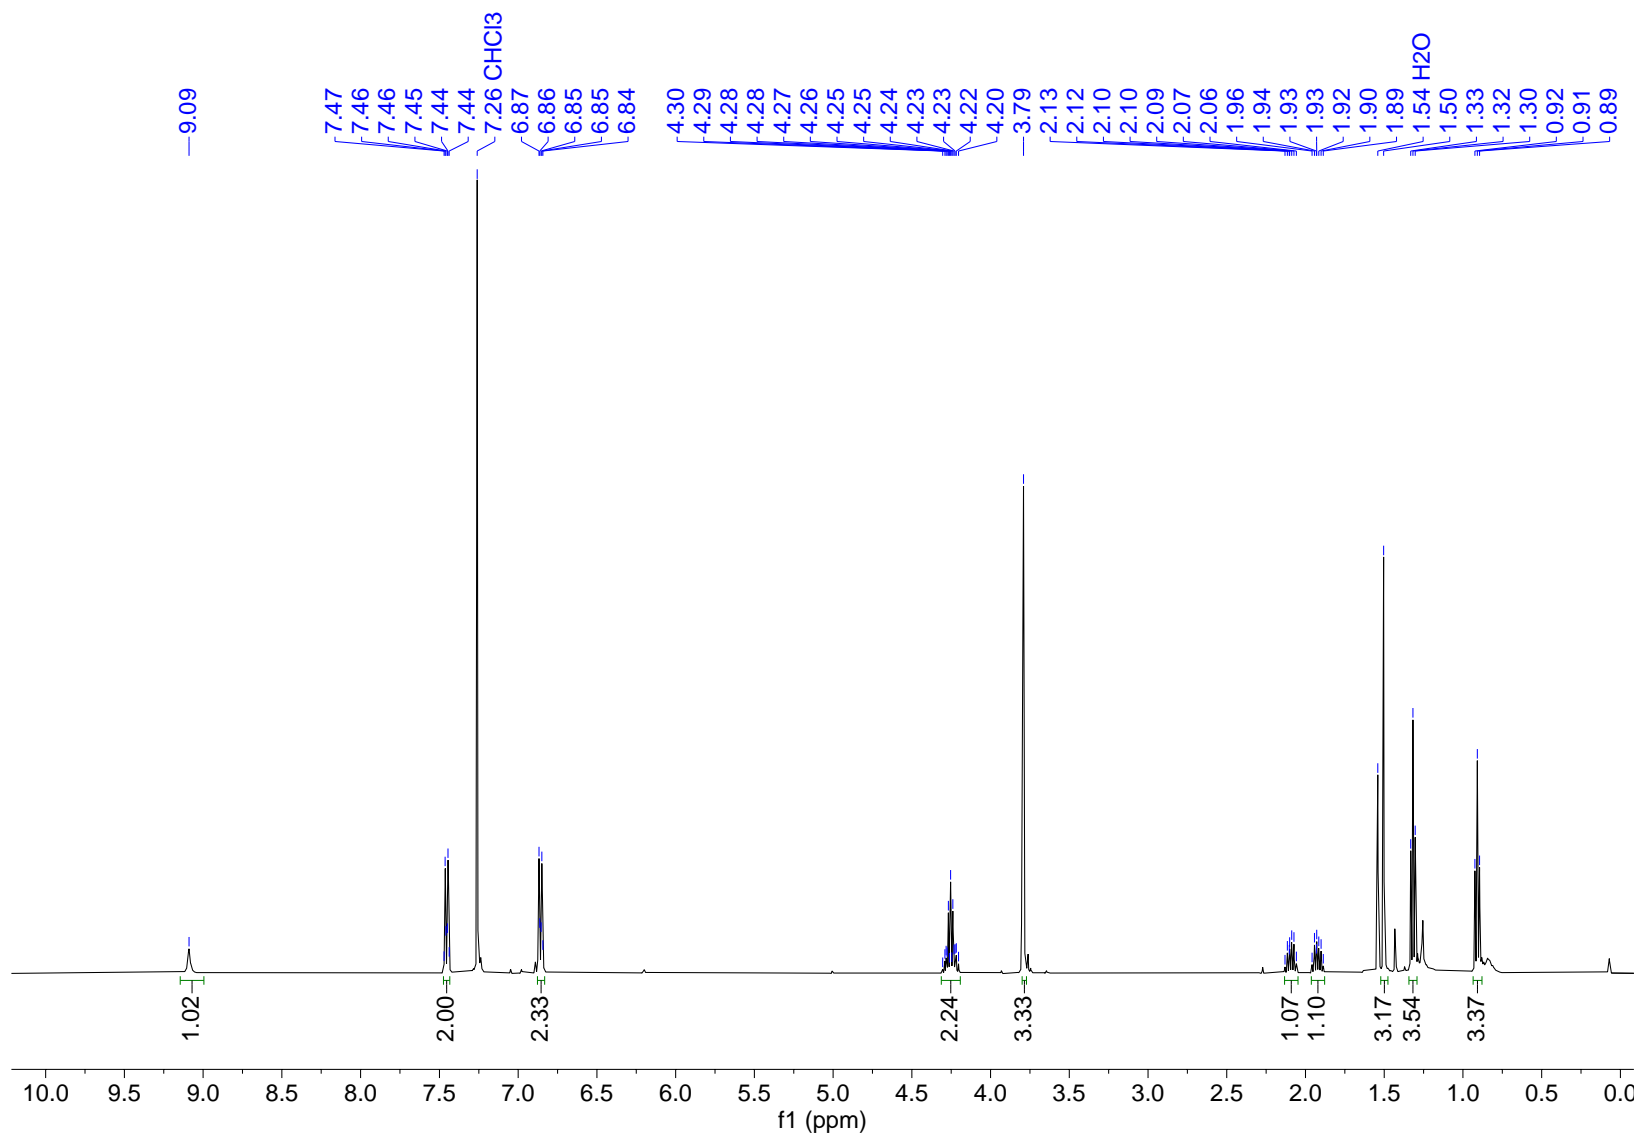

Figure S78:  $^{13}\text{C}$  NMR (125.8 MHz,  $\text{CDCl}_3$ , 298 K) spectrum of **3h**.

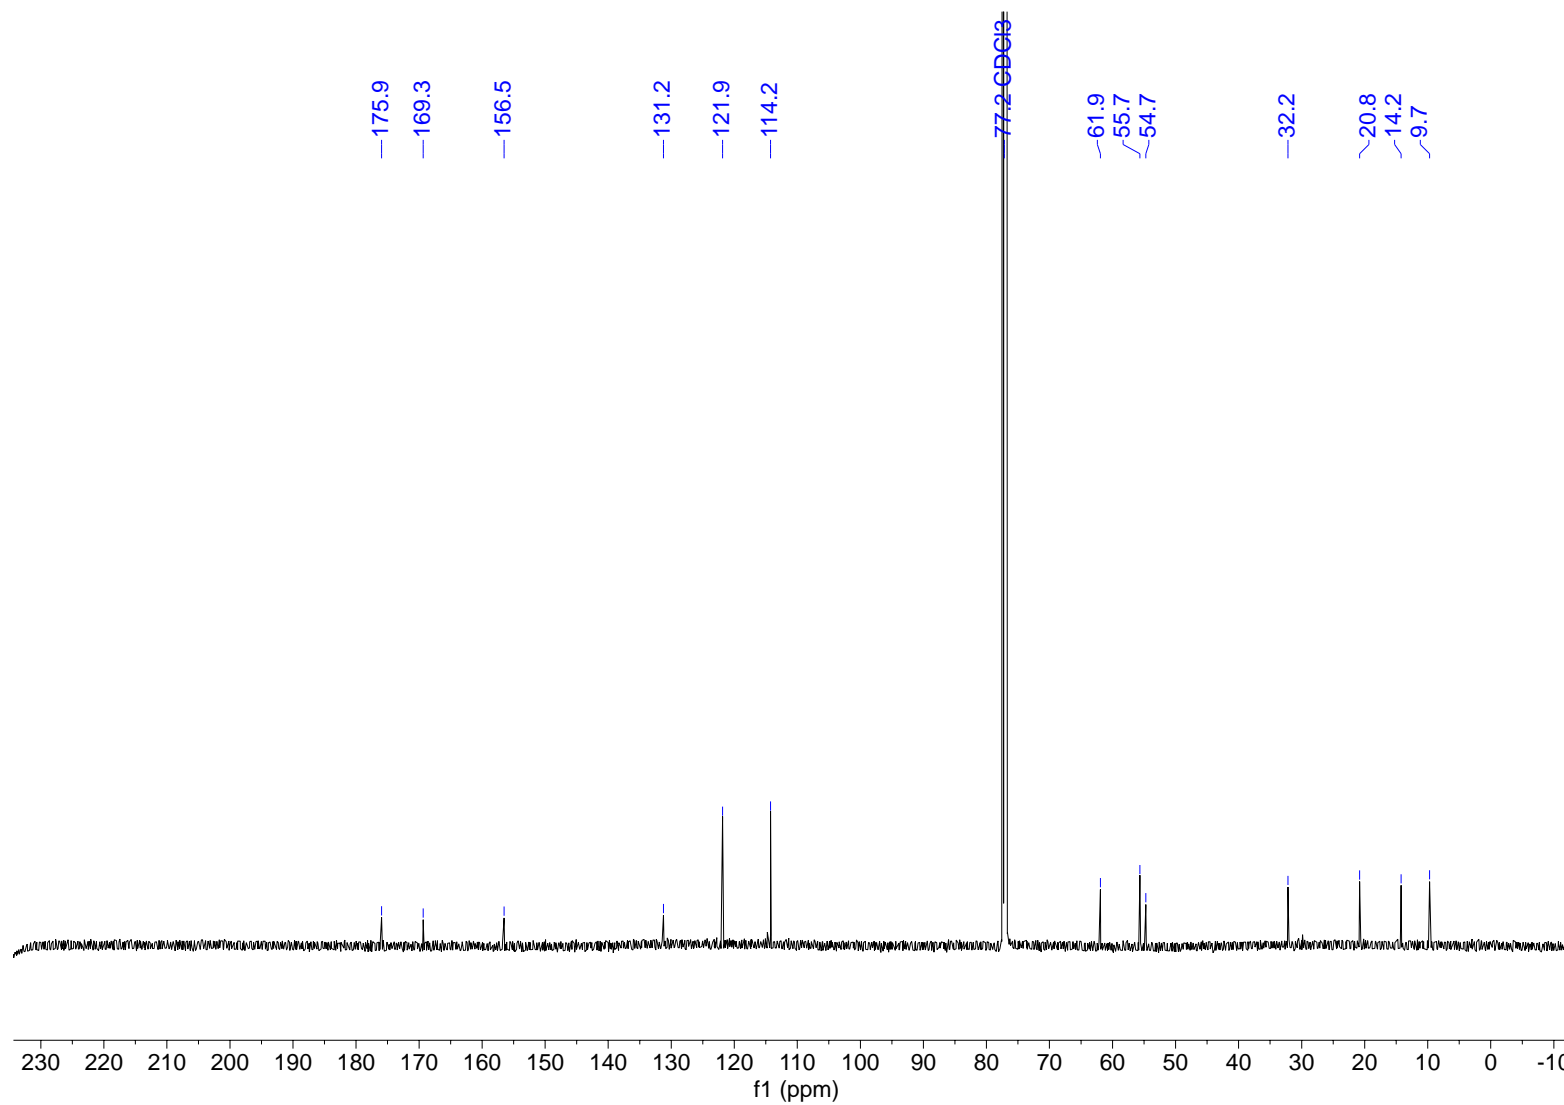



Figure S79:  $^1\text{H}$  NMR (500.2 MHz,  $\text{CDCl}_3$ , 298 K) spectrum of **3f**.

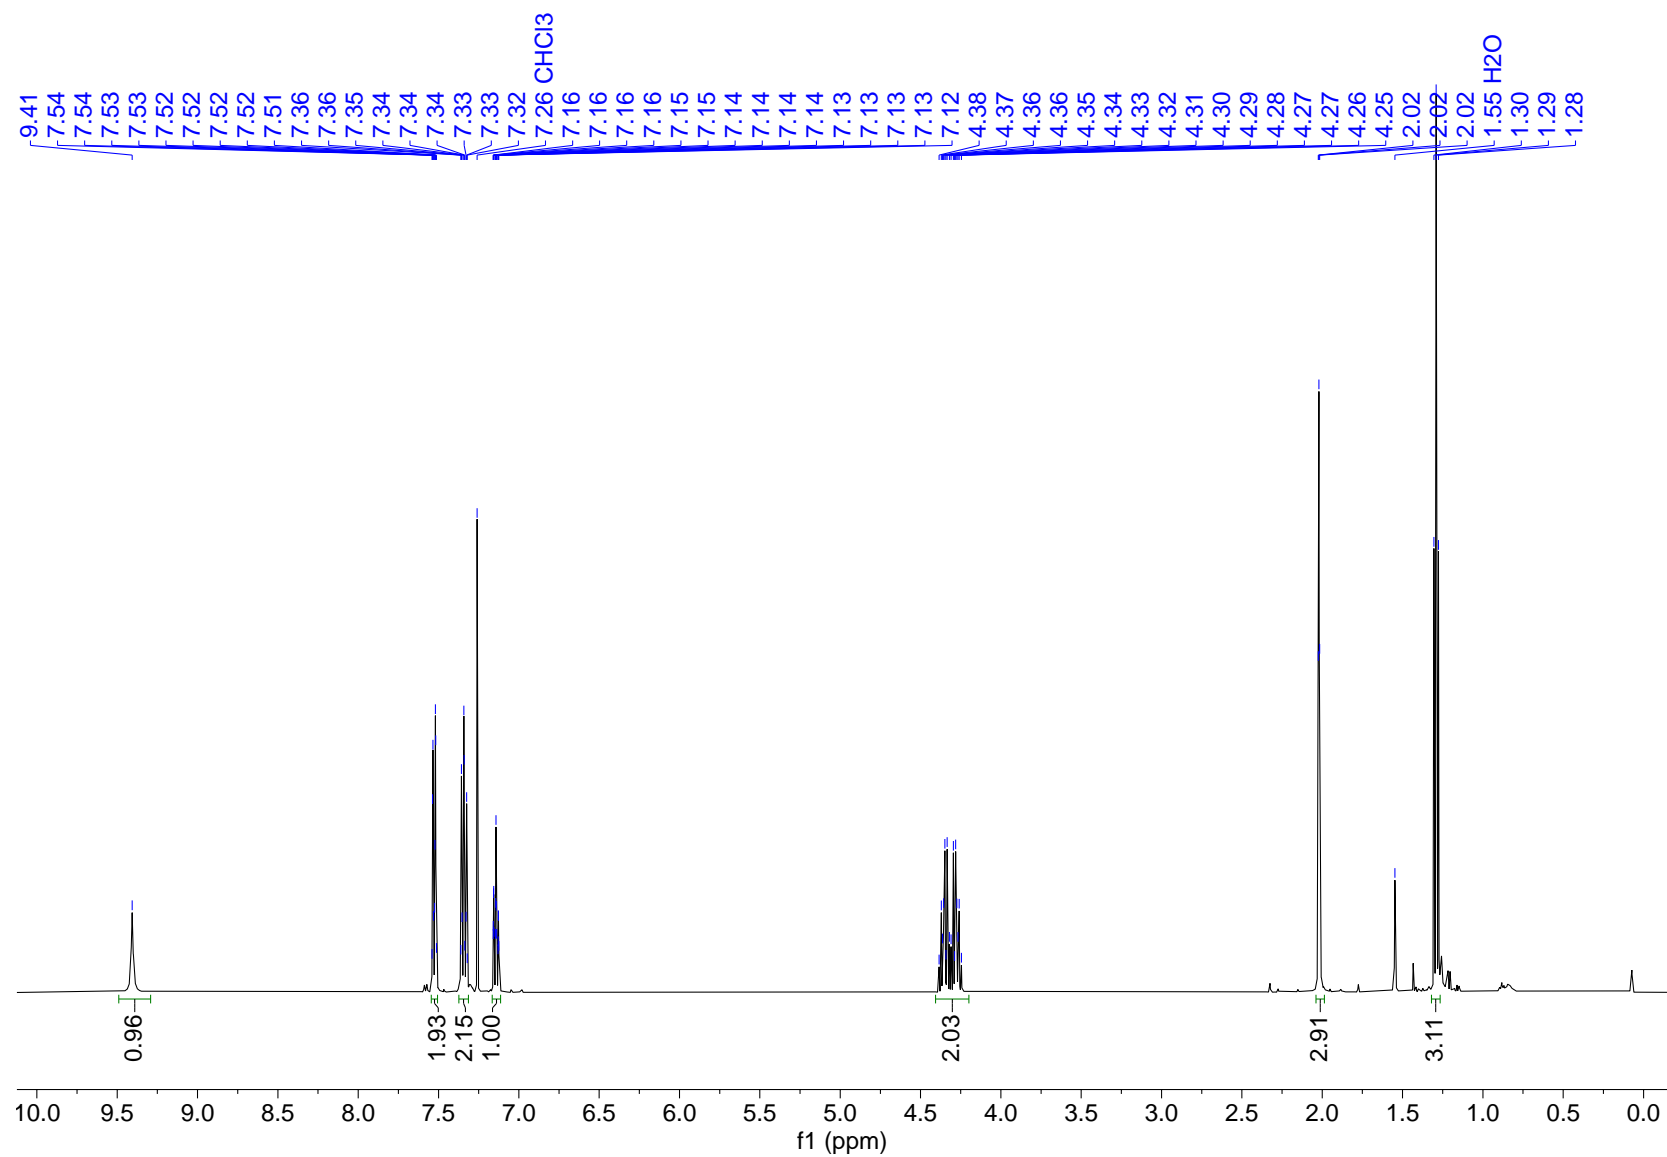

Figure S80:  $^{13}\text{C}$  NMR (125.8 MHz,  $\text{CDCl}_3$ , 298 K) spectrum of **3f**.

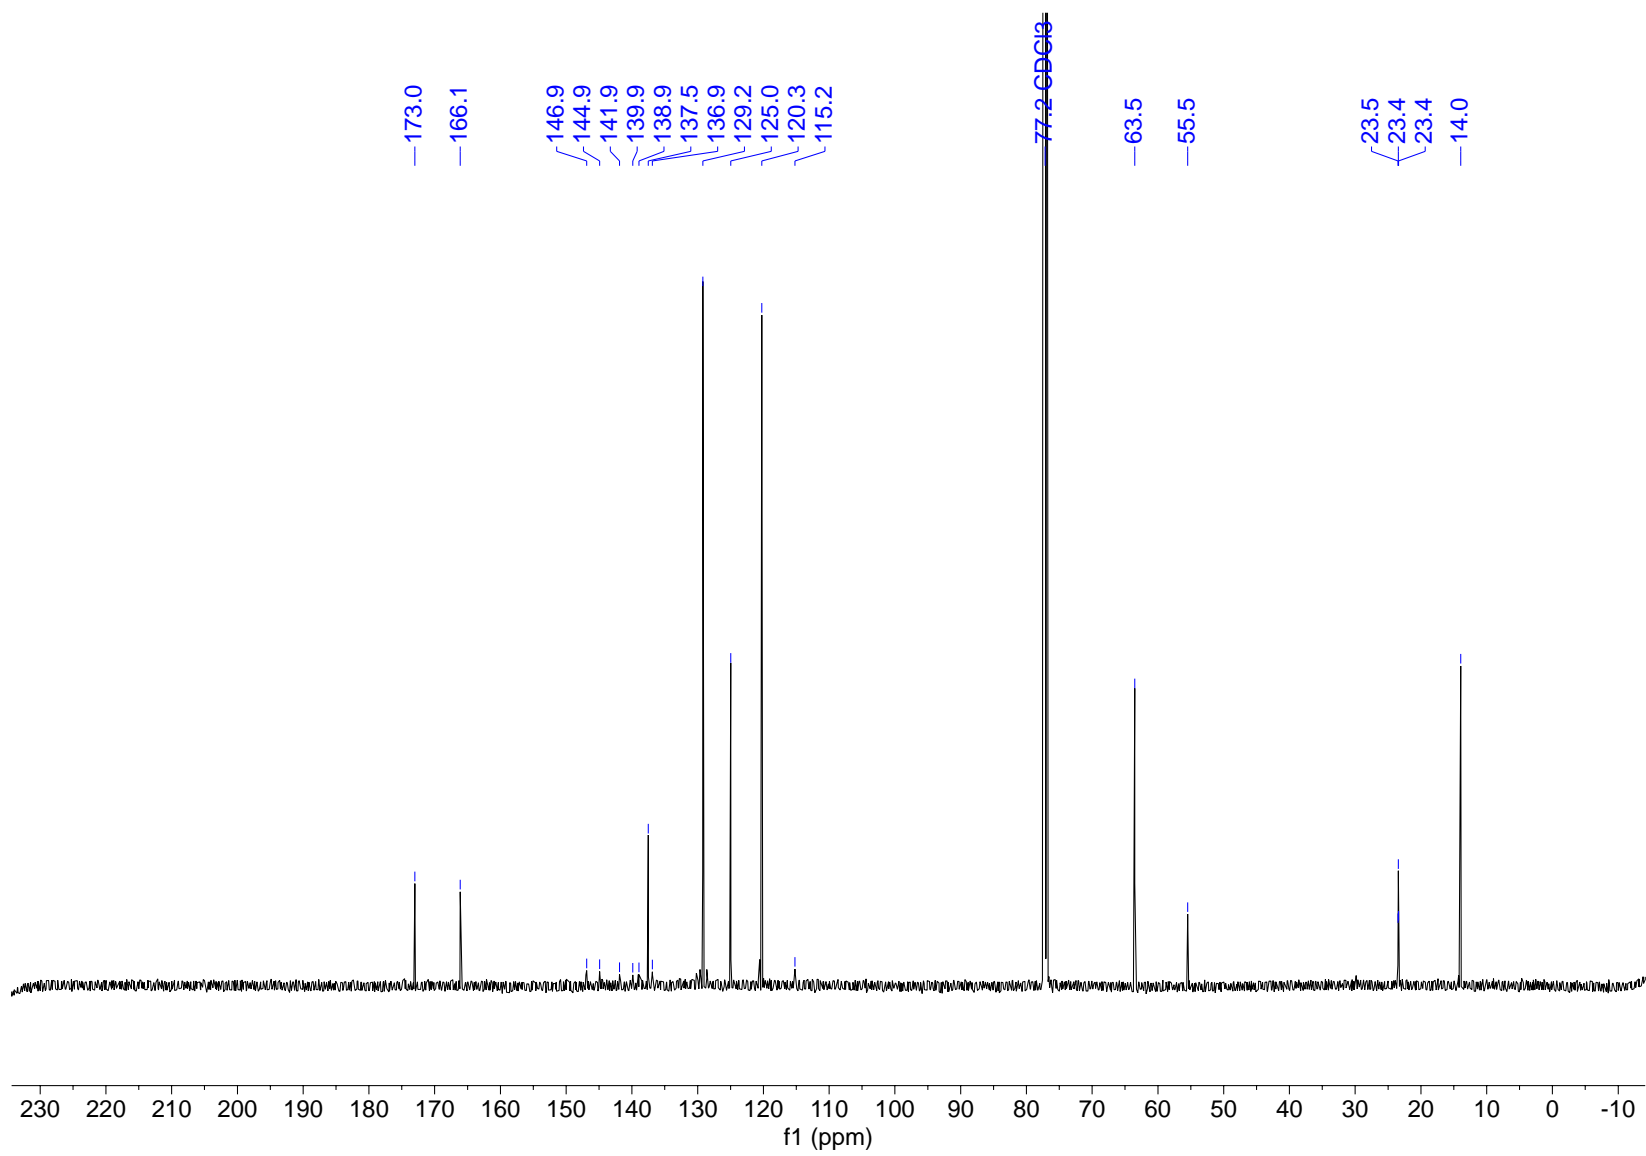

Figure S81:  $^{19}\text{F}$  NMR (470.2 MHz,  $\text{CDCl}_3$ , 298 K) spectrum of **3f**.

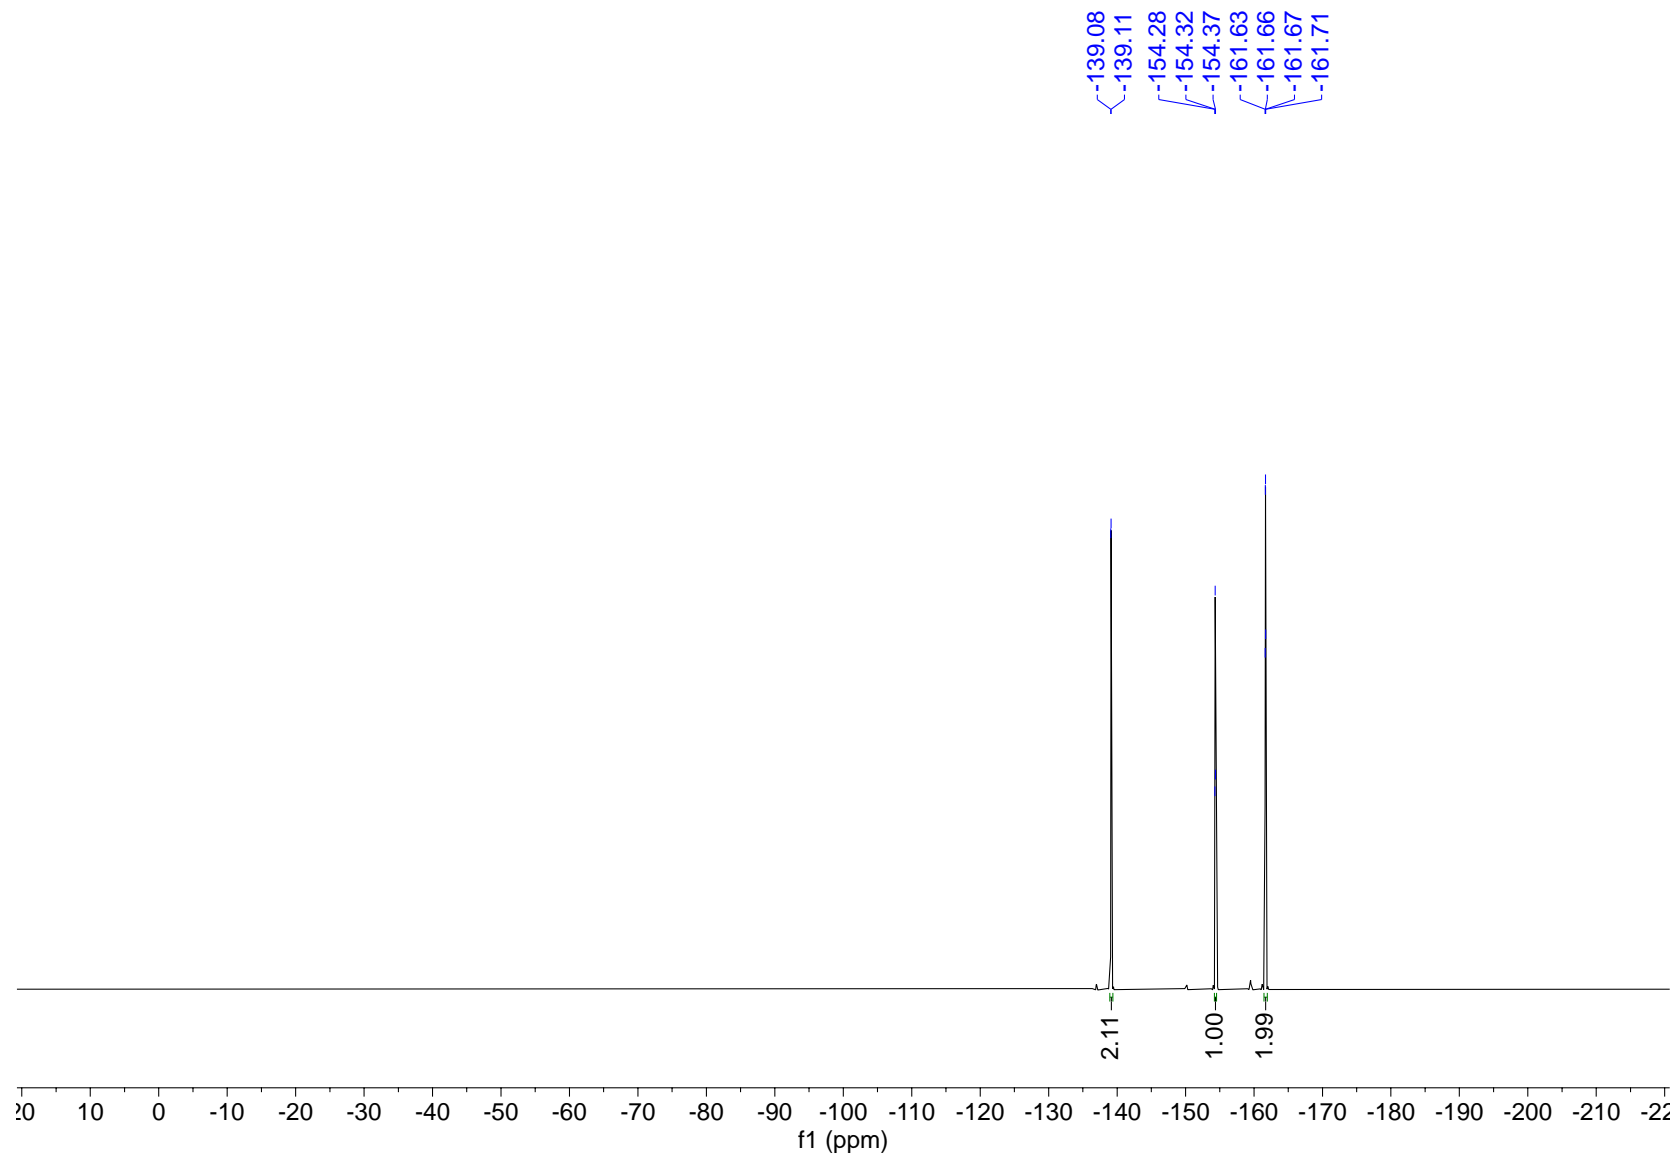

Figure S82:  $^1\text{H}$  NMR (500.2 MHz,  $\text{CDCl}_3$ , 298 K) spectrum of **7a** contaminated with the  $\beta$ -keto ester.

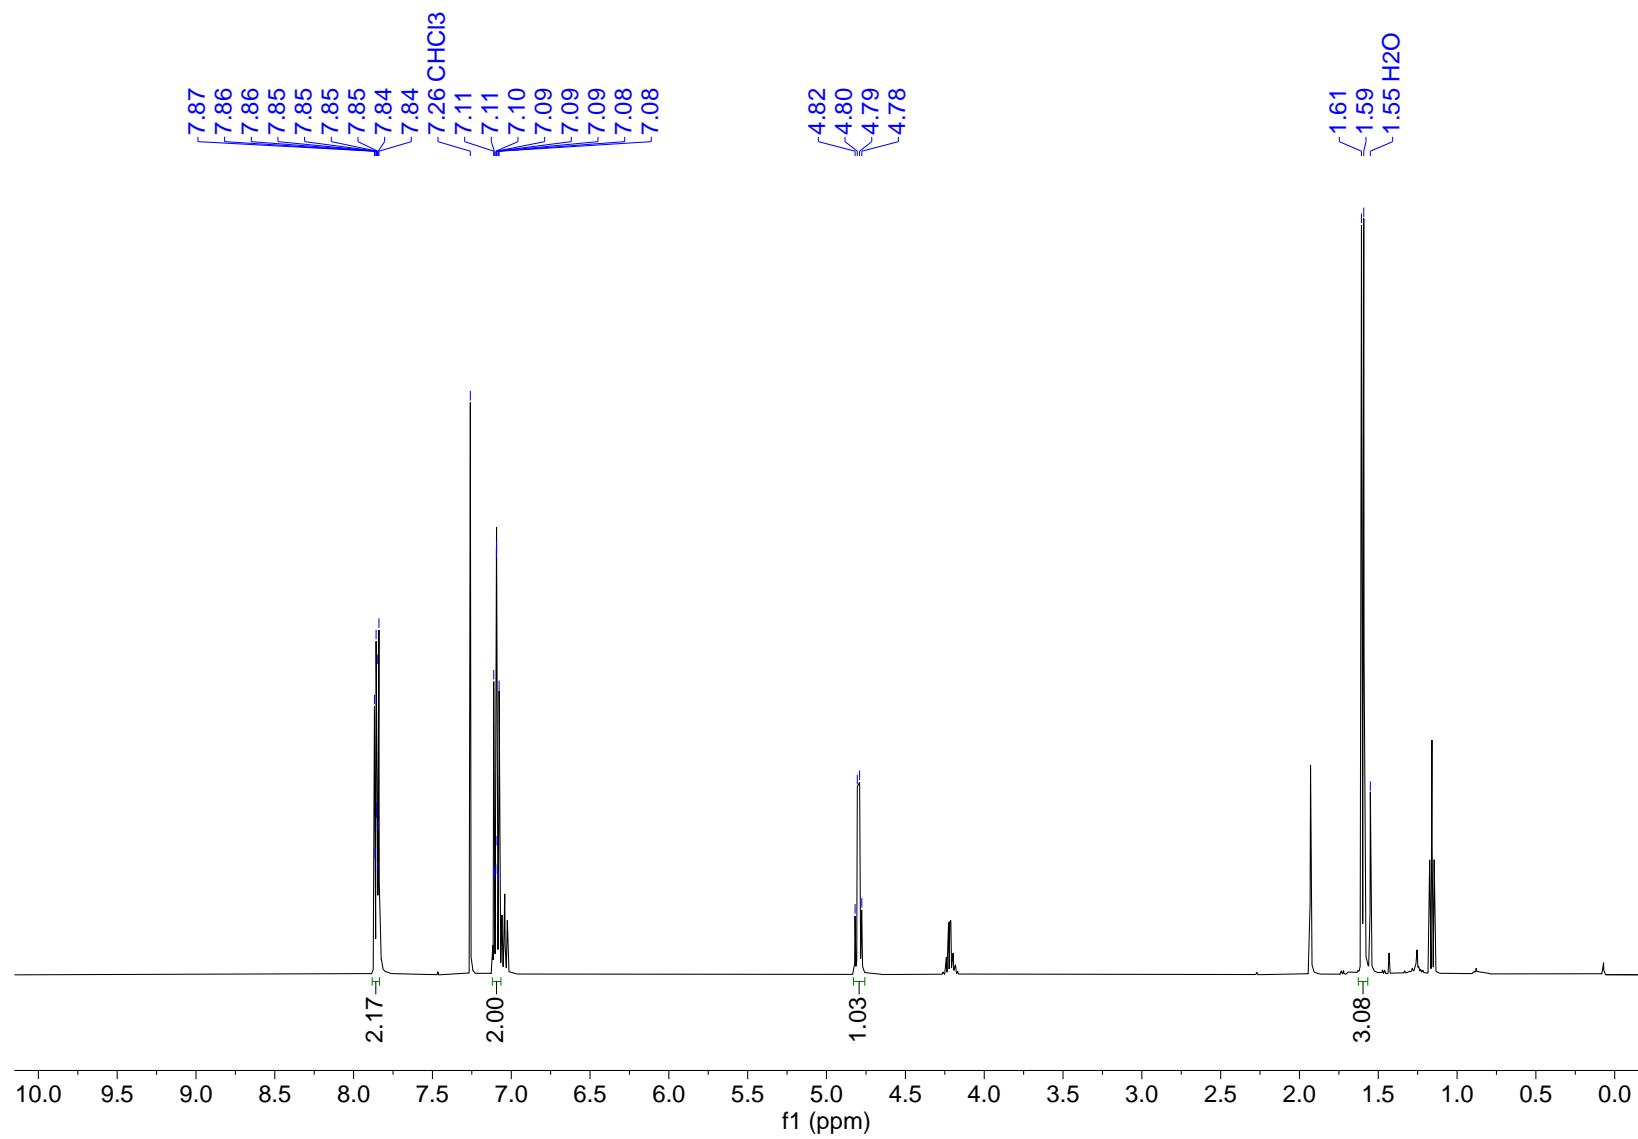

Figure S83:  $^{13}\text{C}$  NMR (125.8 MHz,  $\text{CDCl}_3$ , 298 K) spectrum of **7a** contaminated with the  $\beta$ -keto ester.

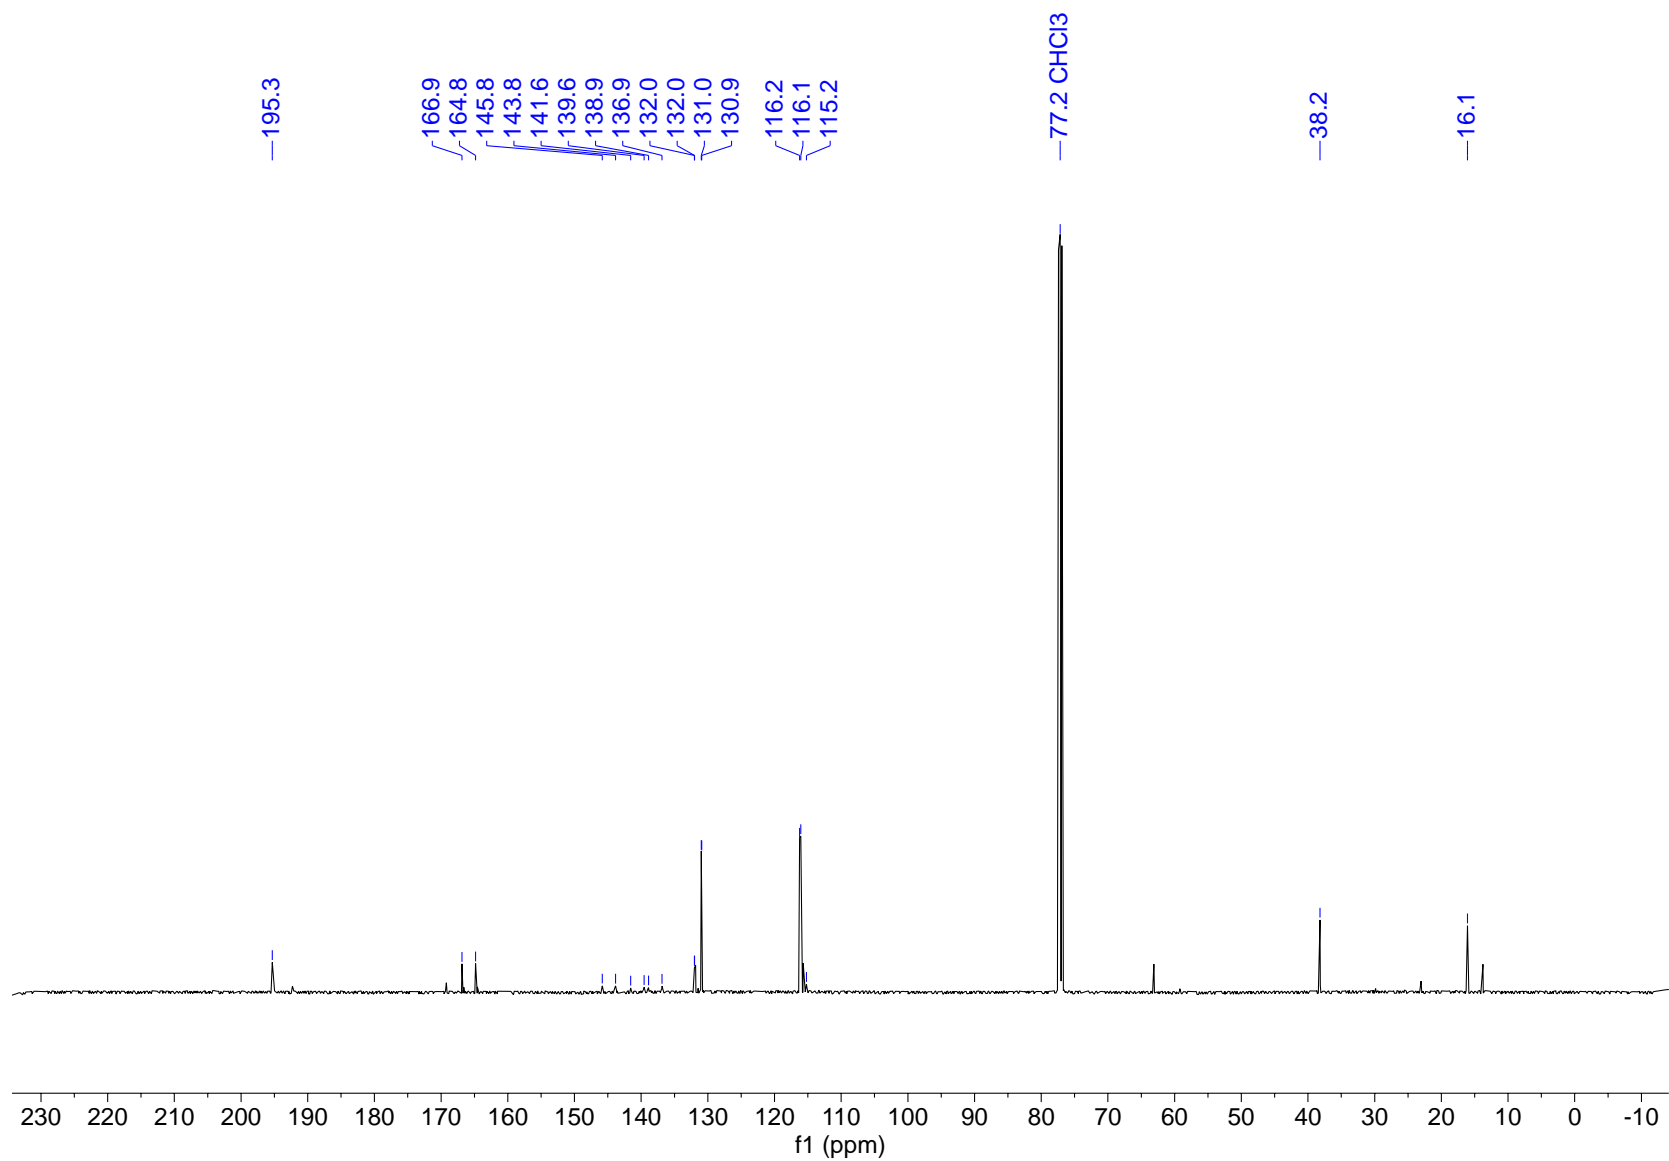

Figure S84:  $^{19}\text{F}$  NMR (470.2 MHz,  $\text{CDCl}_3$ , 298 K) spectrum of **7a** contaminated with the  $\beta$ -keto ester.

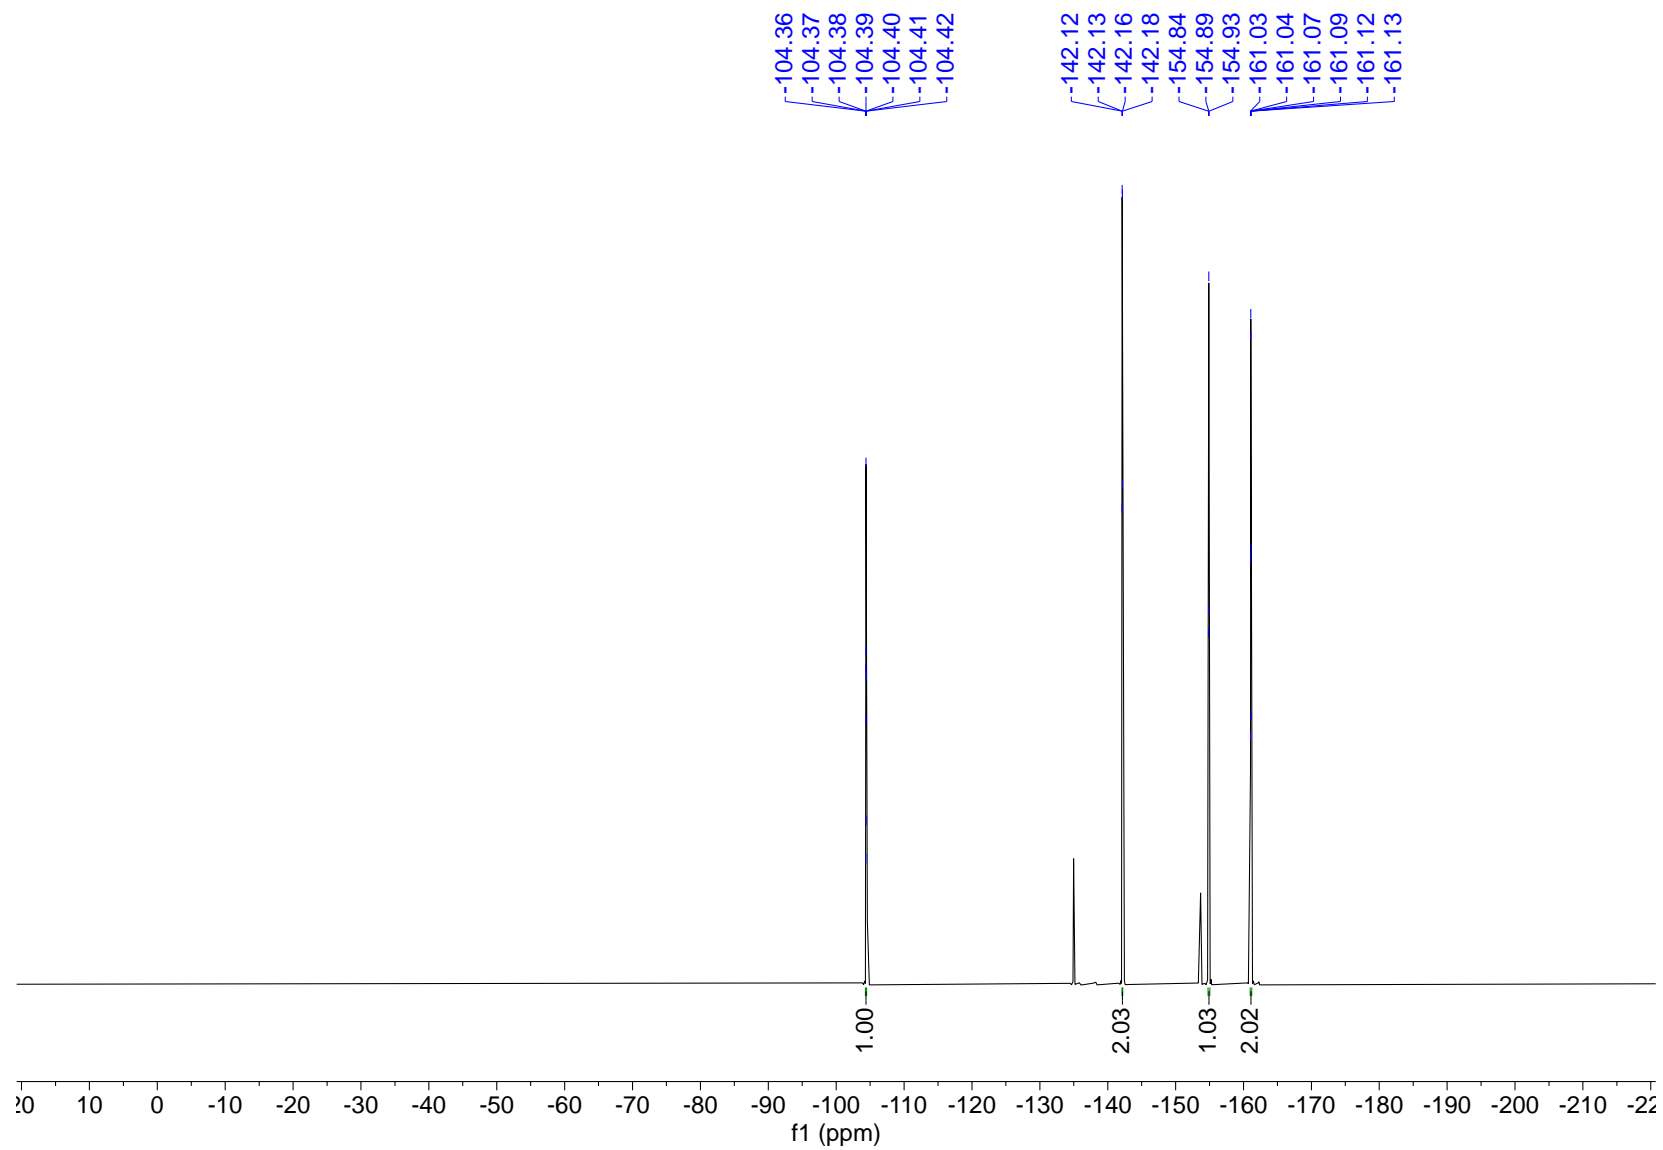

Figure S85:  $^1\text{H}$  NMR (500.2 MHz,  $\text{CDCl}_3$ , 298 K) spectrum of **7b**.

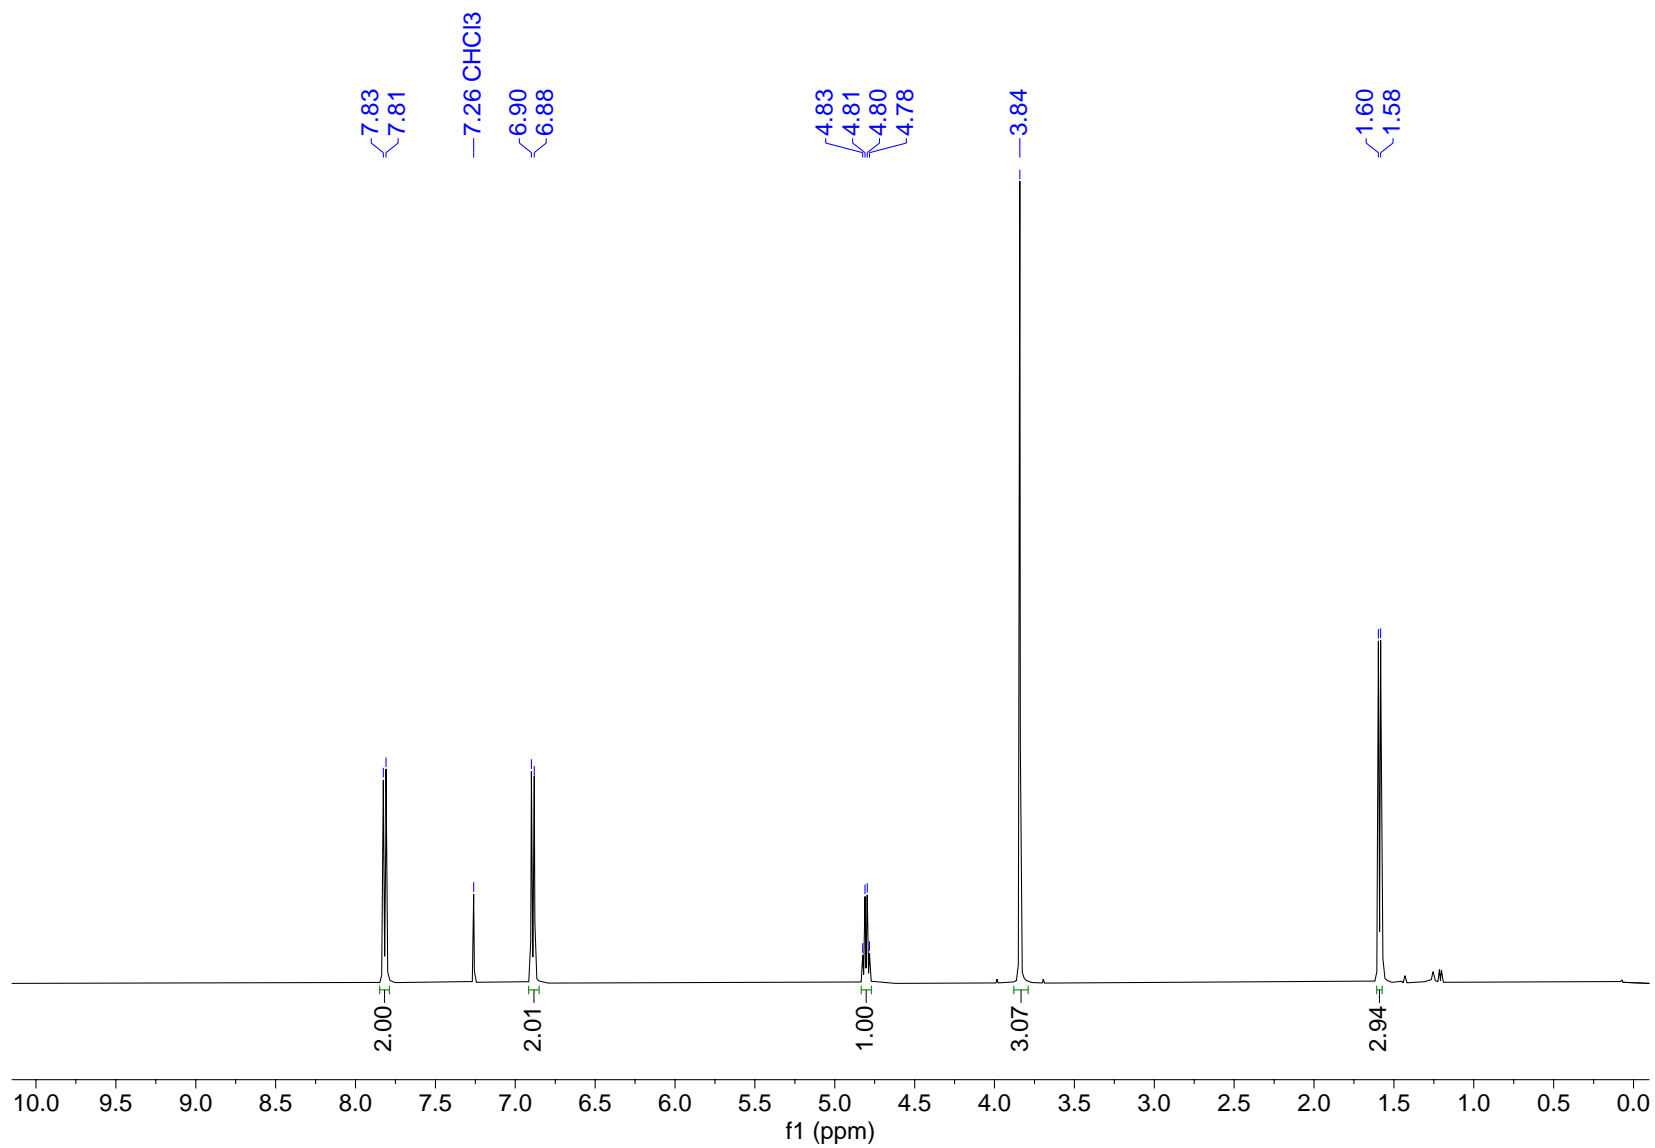

Figure S86:  $^{13}\text{C}$  NMR (125.8 MHz,  $\text{CDCl}_3$ , 298 K) spectrum of **7b**.

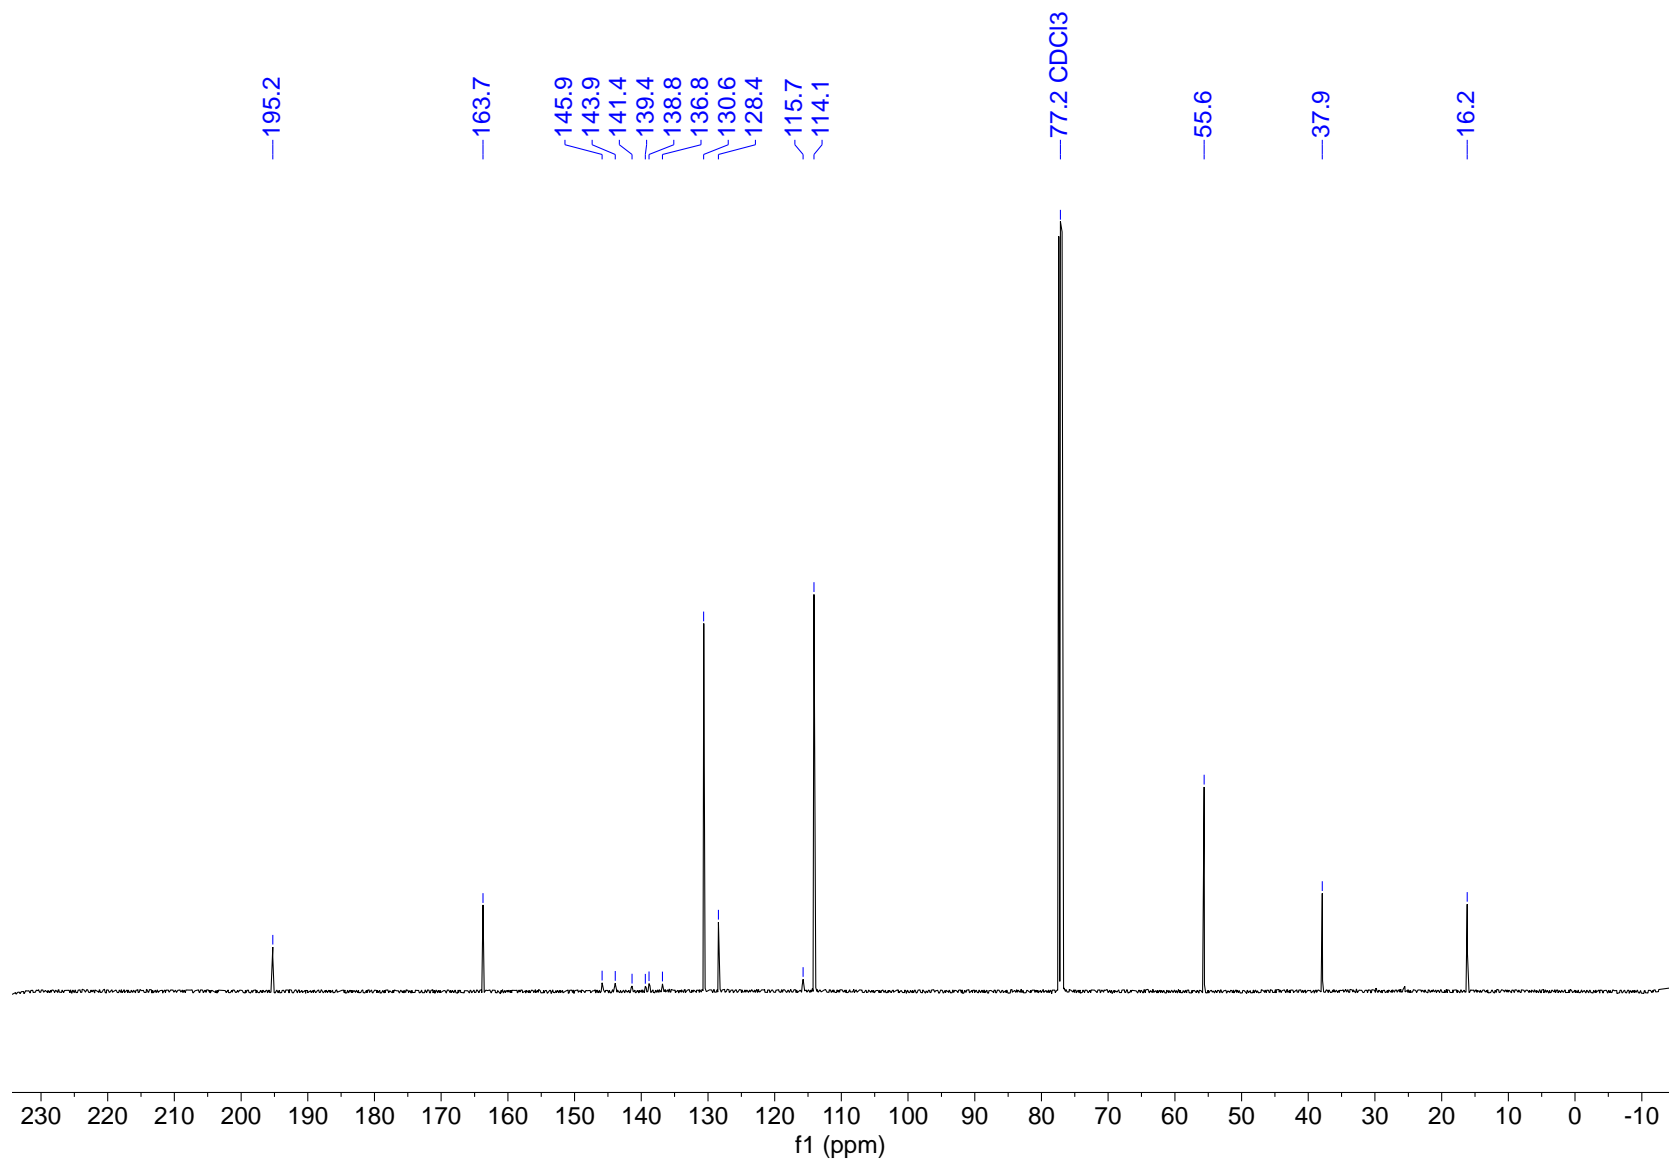



Figure S87:  $^{19}\text{F}$  NMR (470.2 MHz,  $\text{CDCl}_3$ , 298 K) spectrum of **7b**.

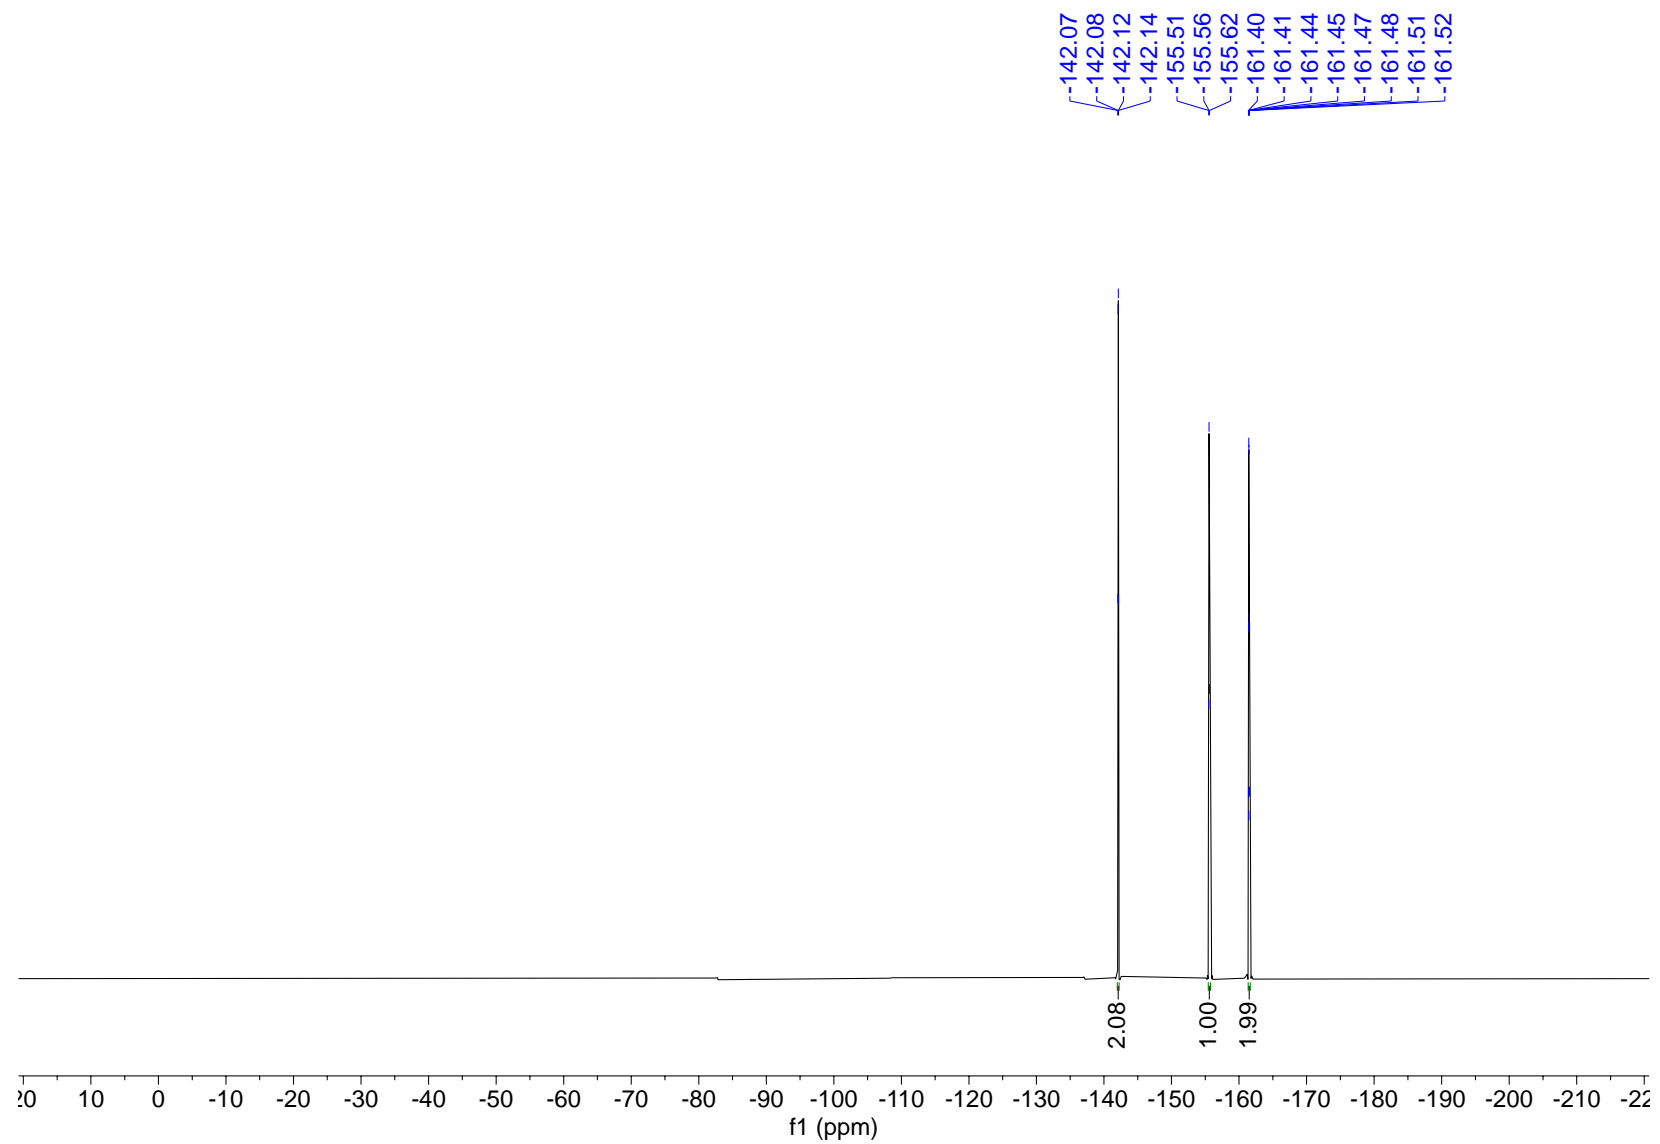

Figure S88:  $^1\text{H}$  NMR (500.2 MHz,  $\text{CDCl}_3$ , 298 K) spectrum of **7c**.

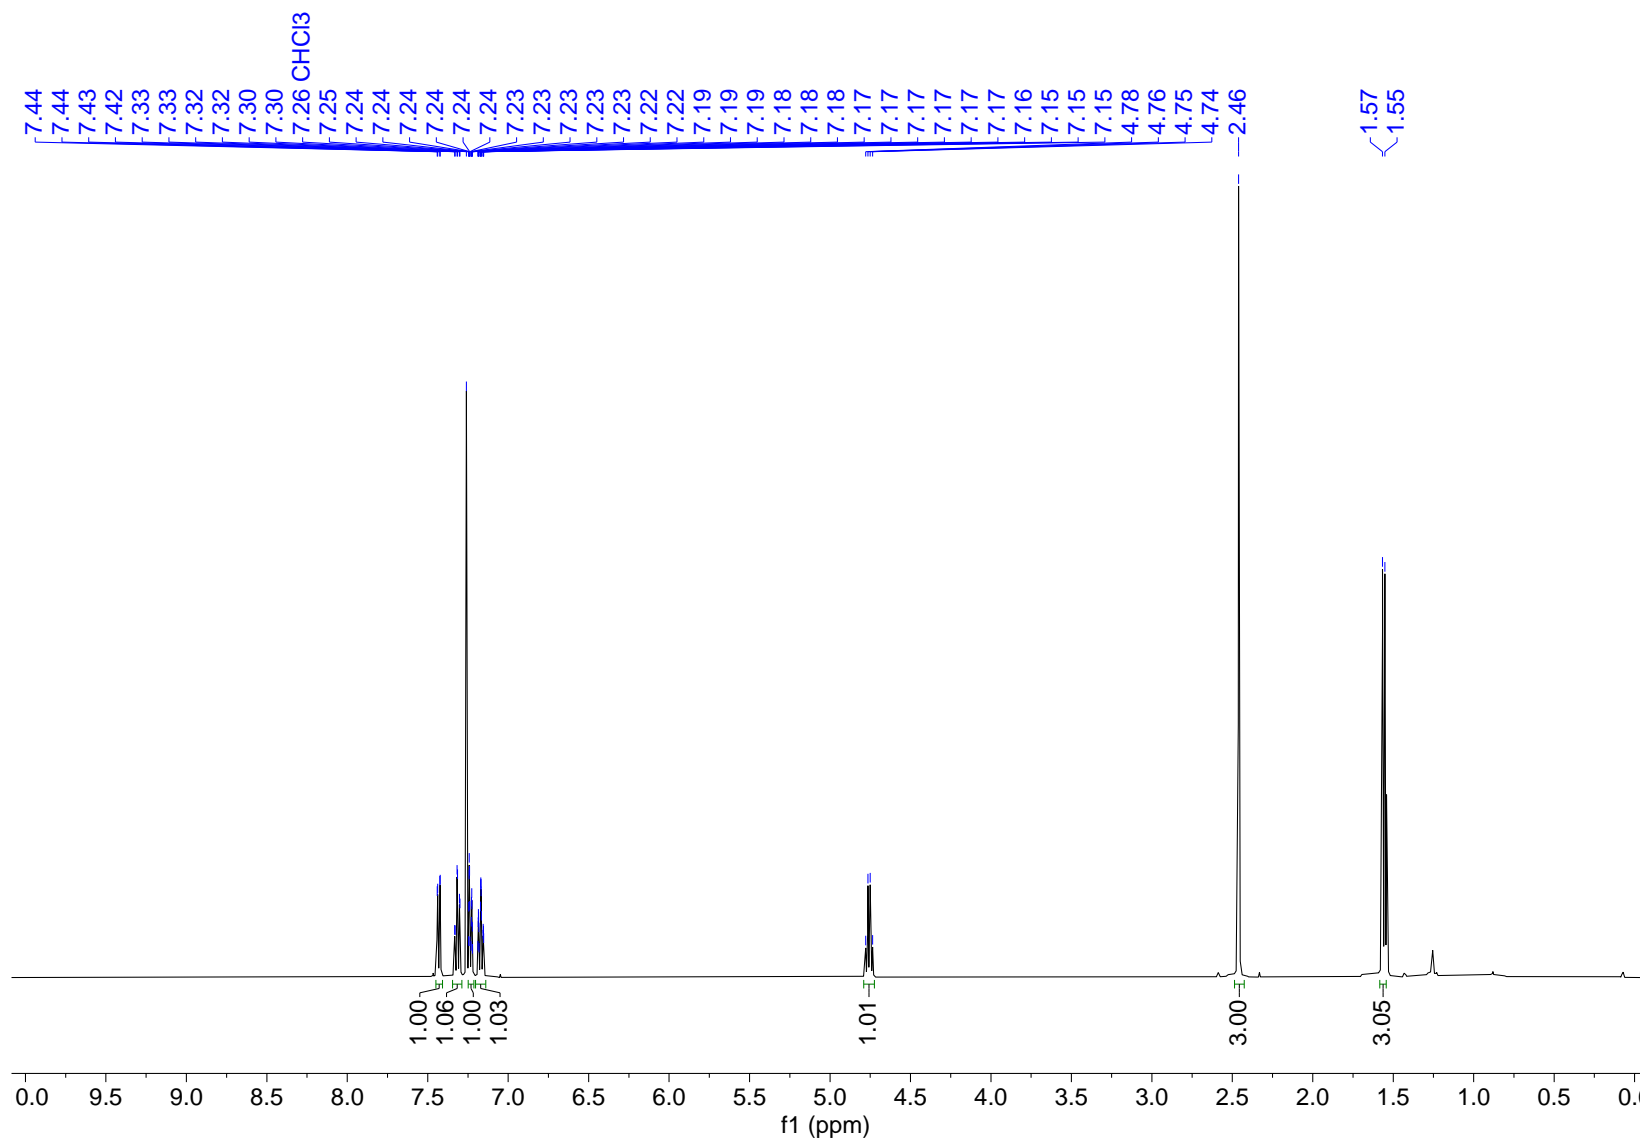

Figure S89:  $^{13}\text{C}$  NMR (125.8 MHz,  $\text{CDCl}_3$ , 298 K) spectrum of **7c**.

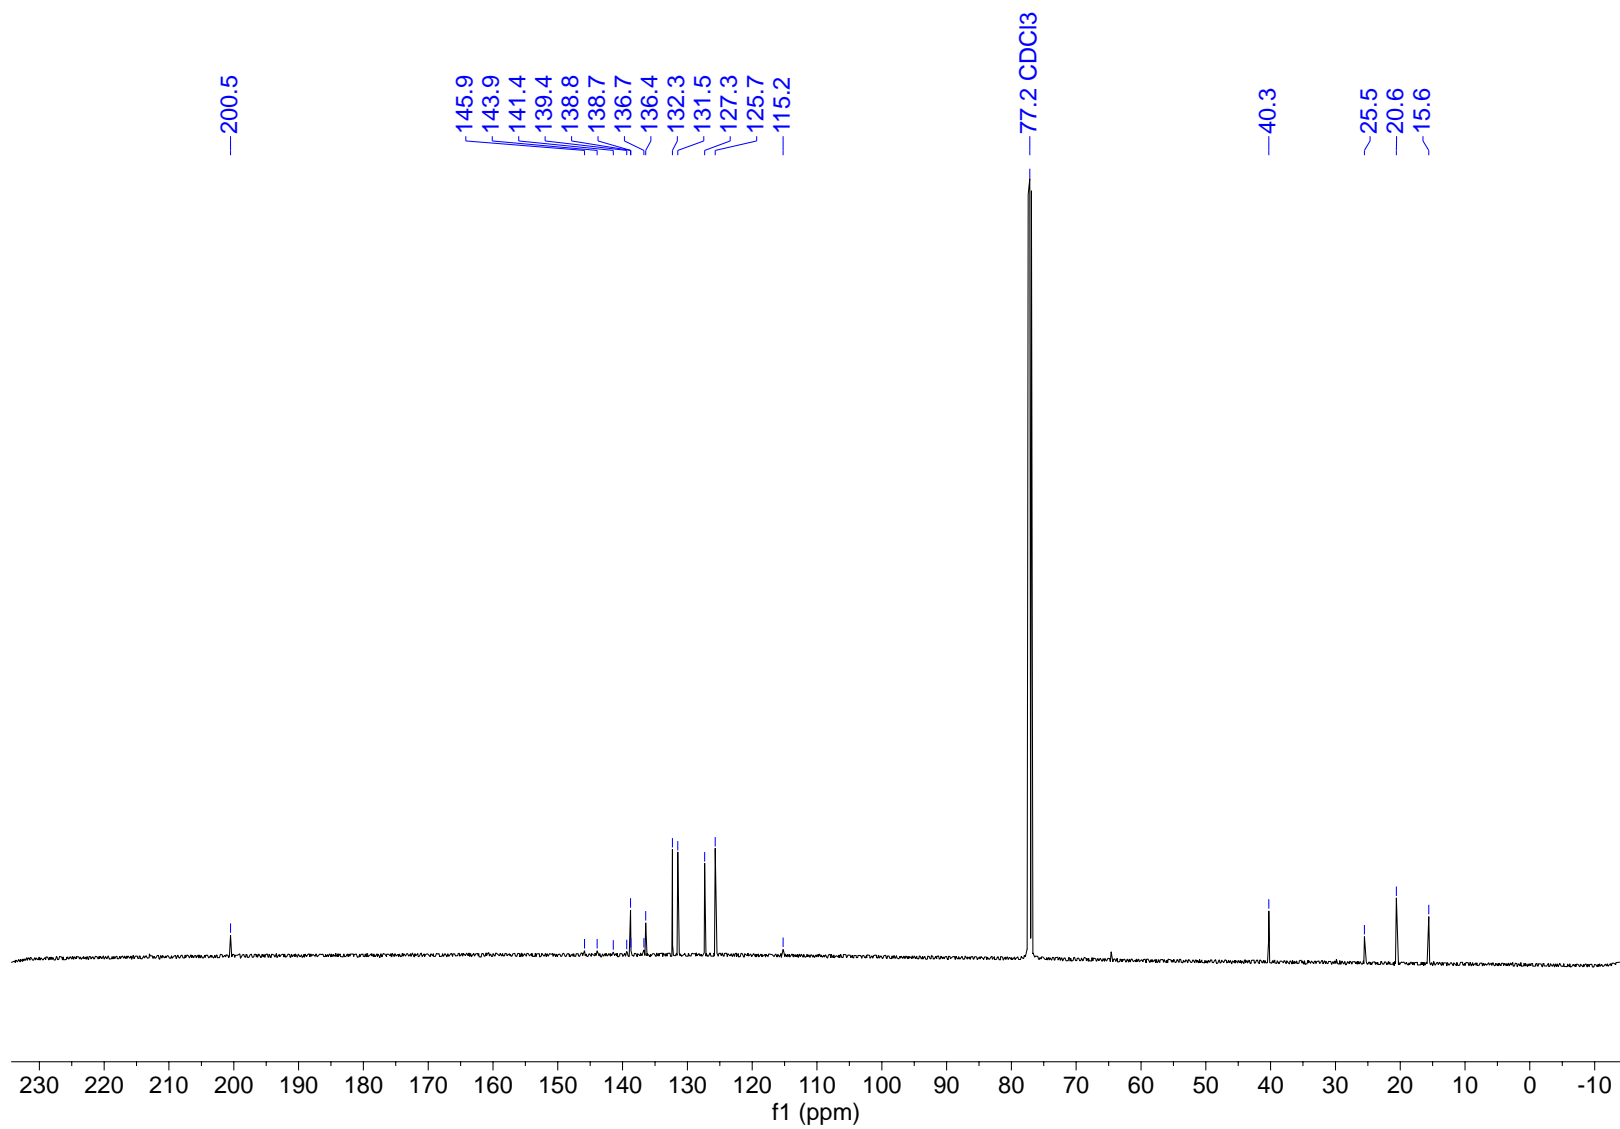

Figure S90:  $^{19}\text{F}$  NMR (470.2 MHz,  $\text{CDCl}_3$ , 298 K) spectrum of **7c**.

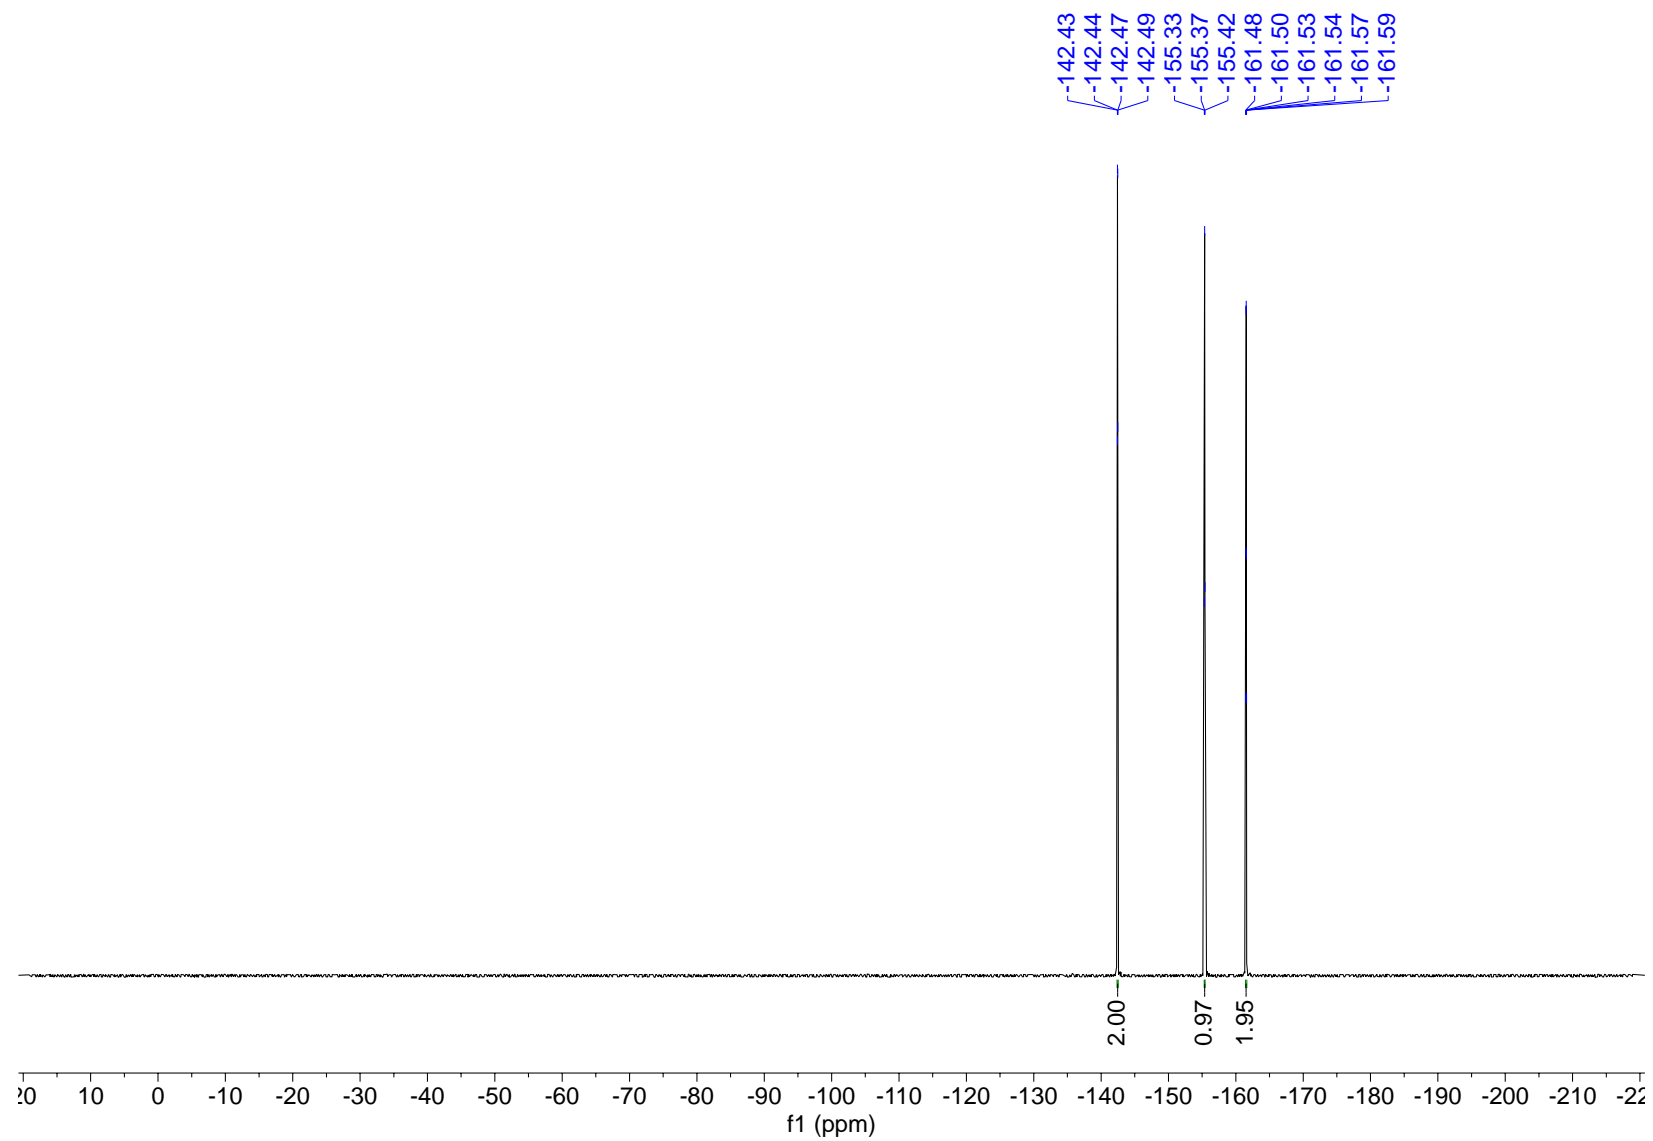

Figure S91:  $^1\text{H}$  NMR (500.2 MHz,  $\text{CDCl}_3$ , 298 K) spectrum of **7d**.

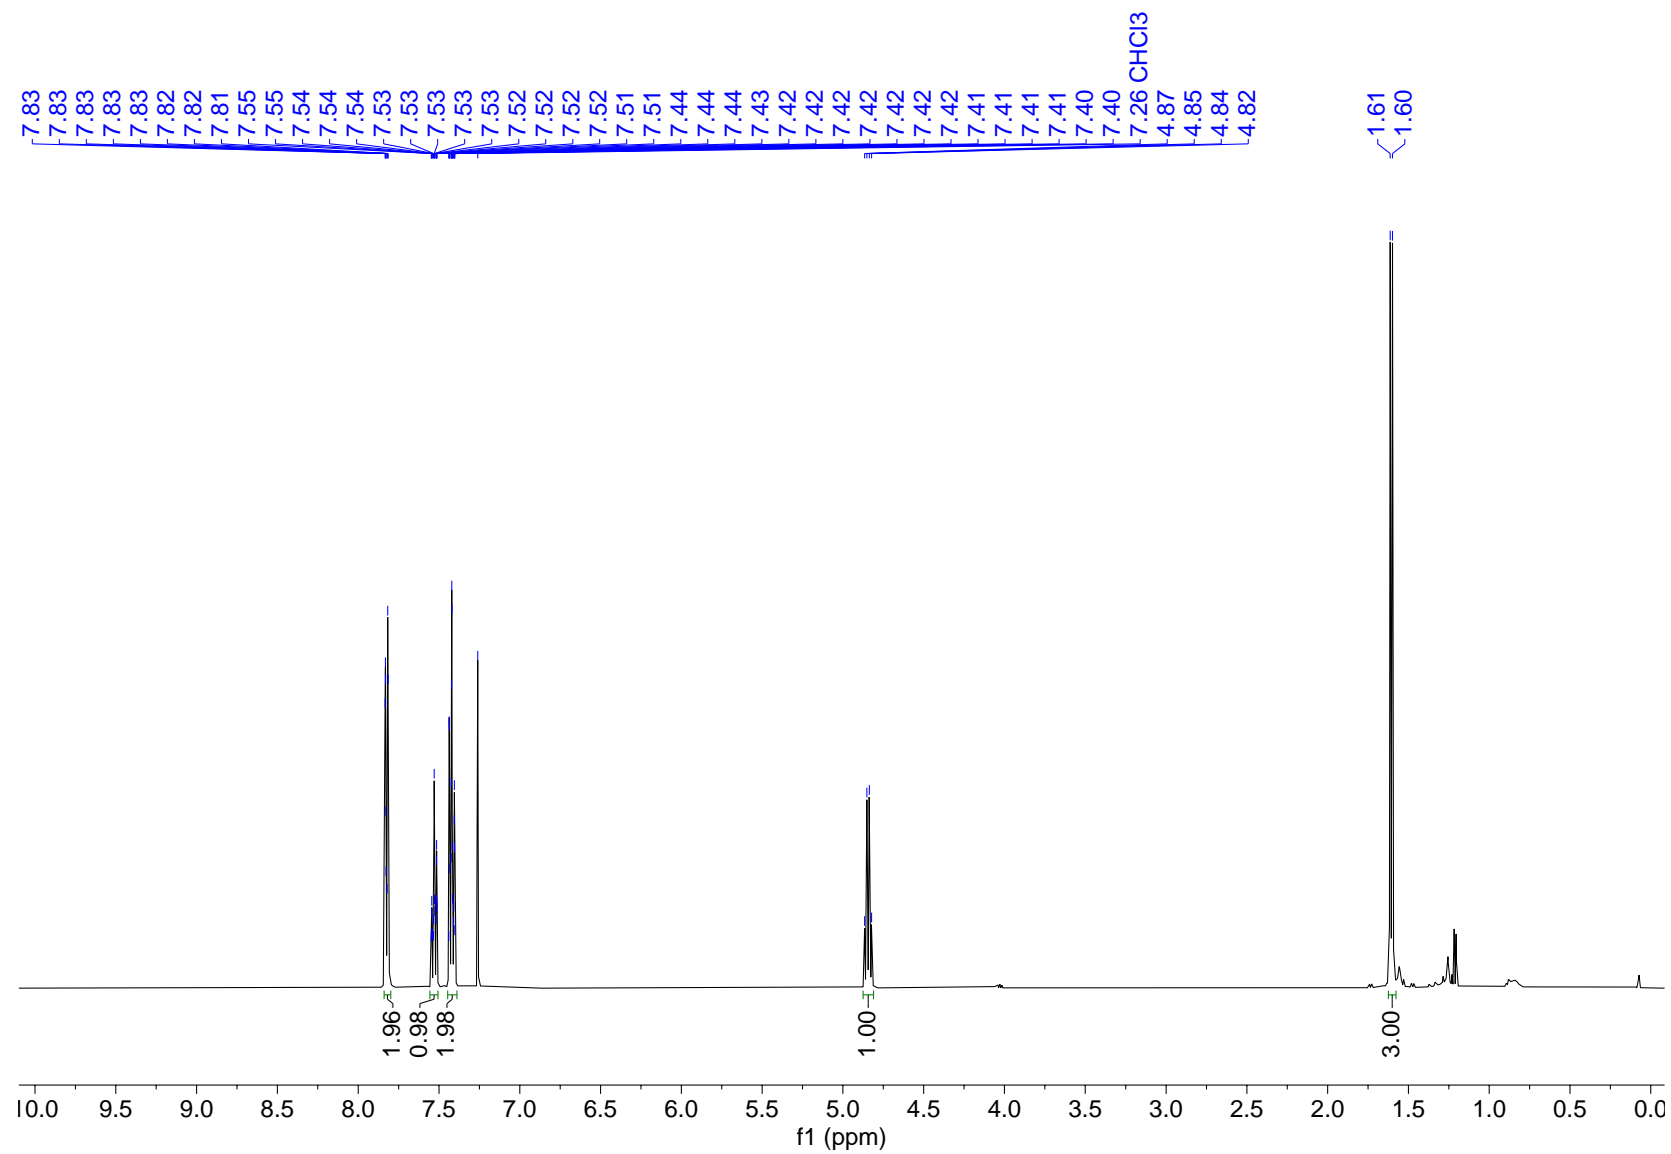

Figure S92:  $^{13}\text{C}$  NMR (125.8 MHz,  $\text{CDCl}_3$ , 298 K) spectrum of **7d**.

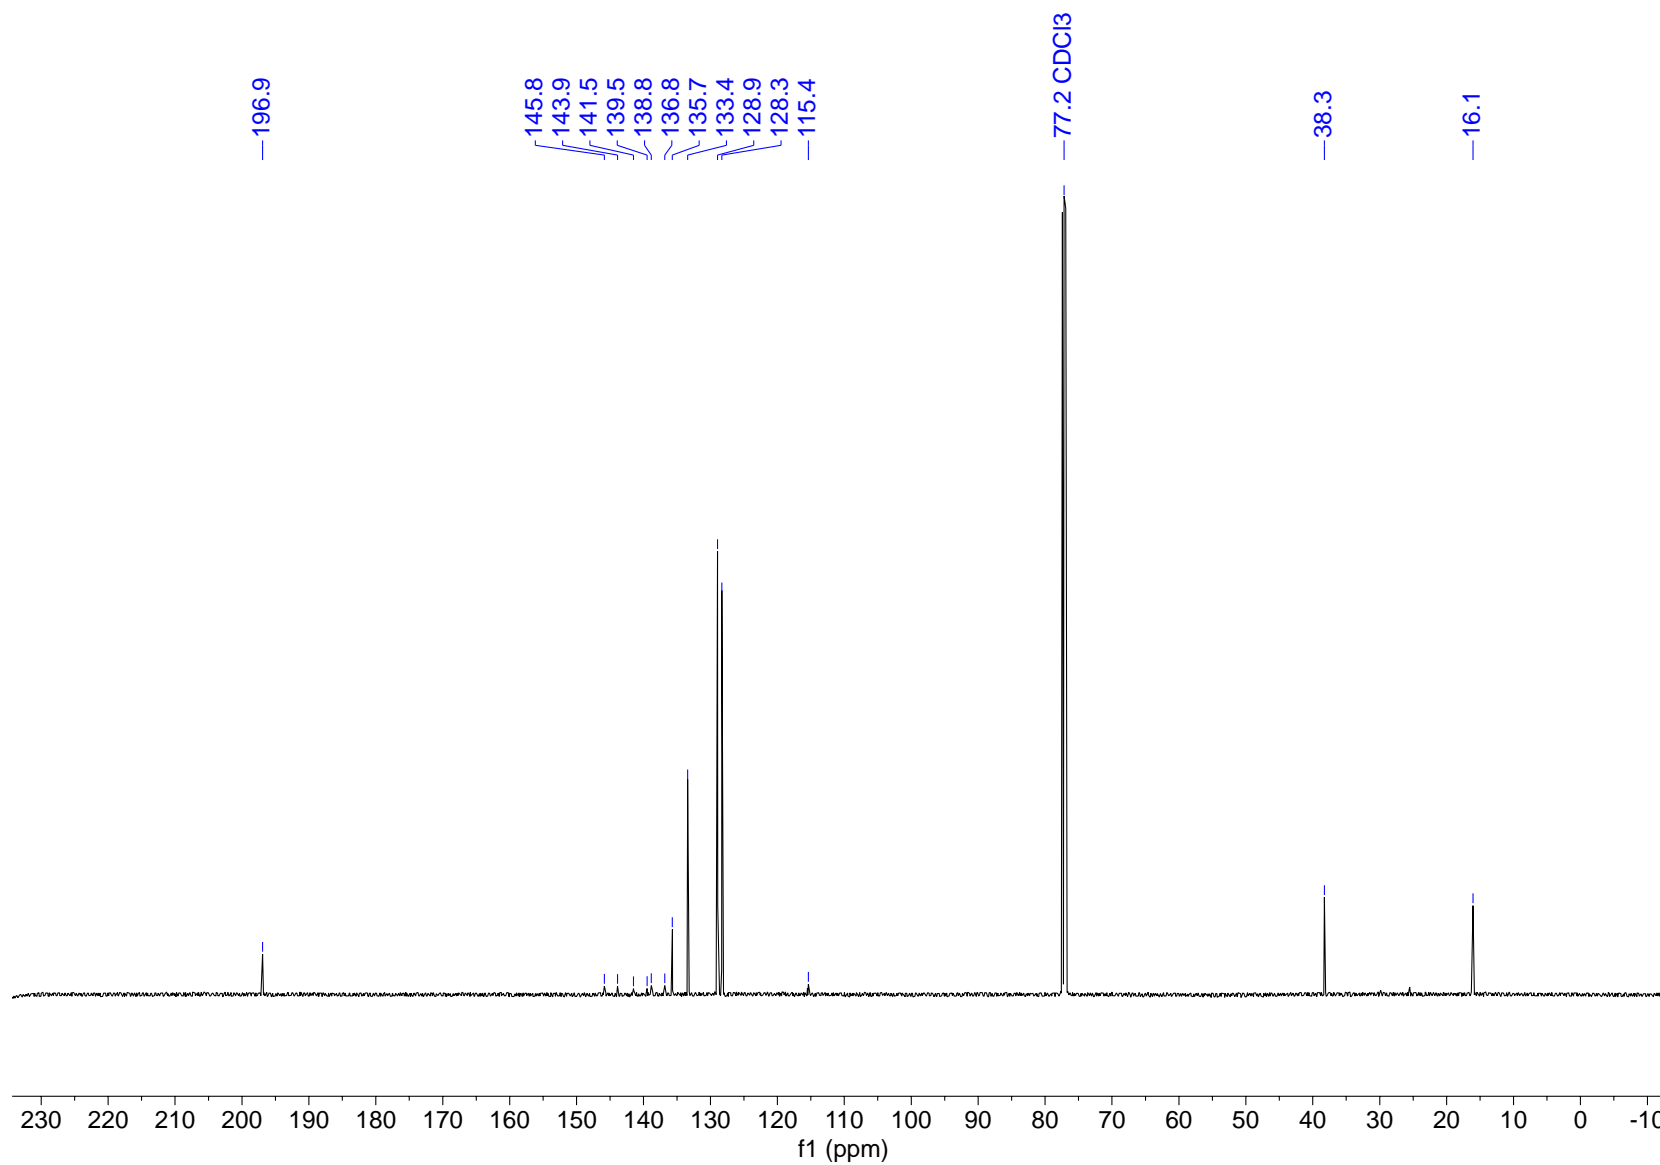

Figure S93:  $^{19}\text{F}$  NMR (470.2 MHz,  $\text{CDCl}_3$ , 298 K) spectrum of **7d**.

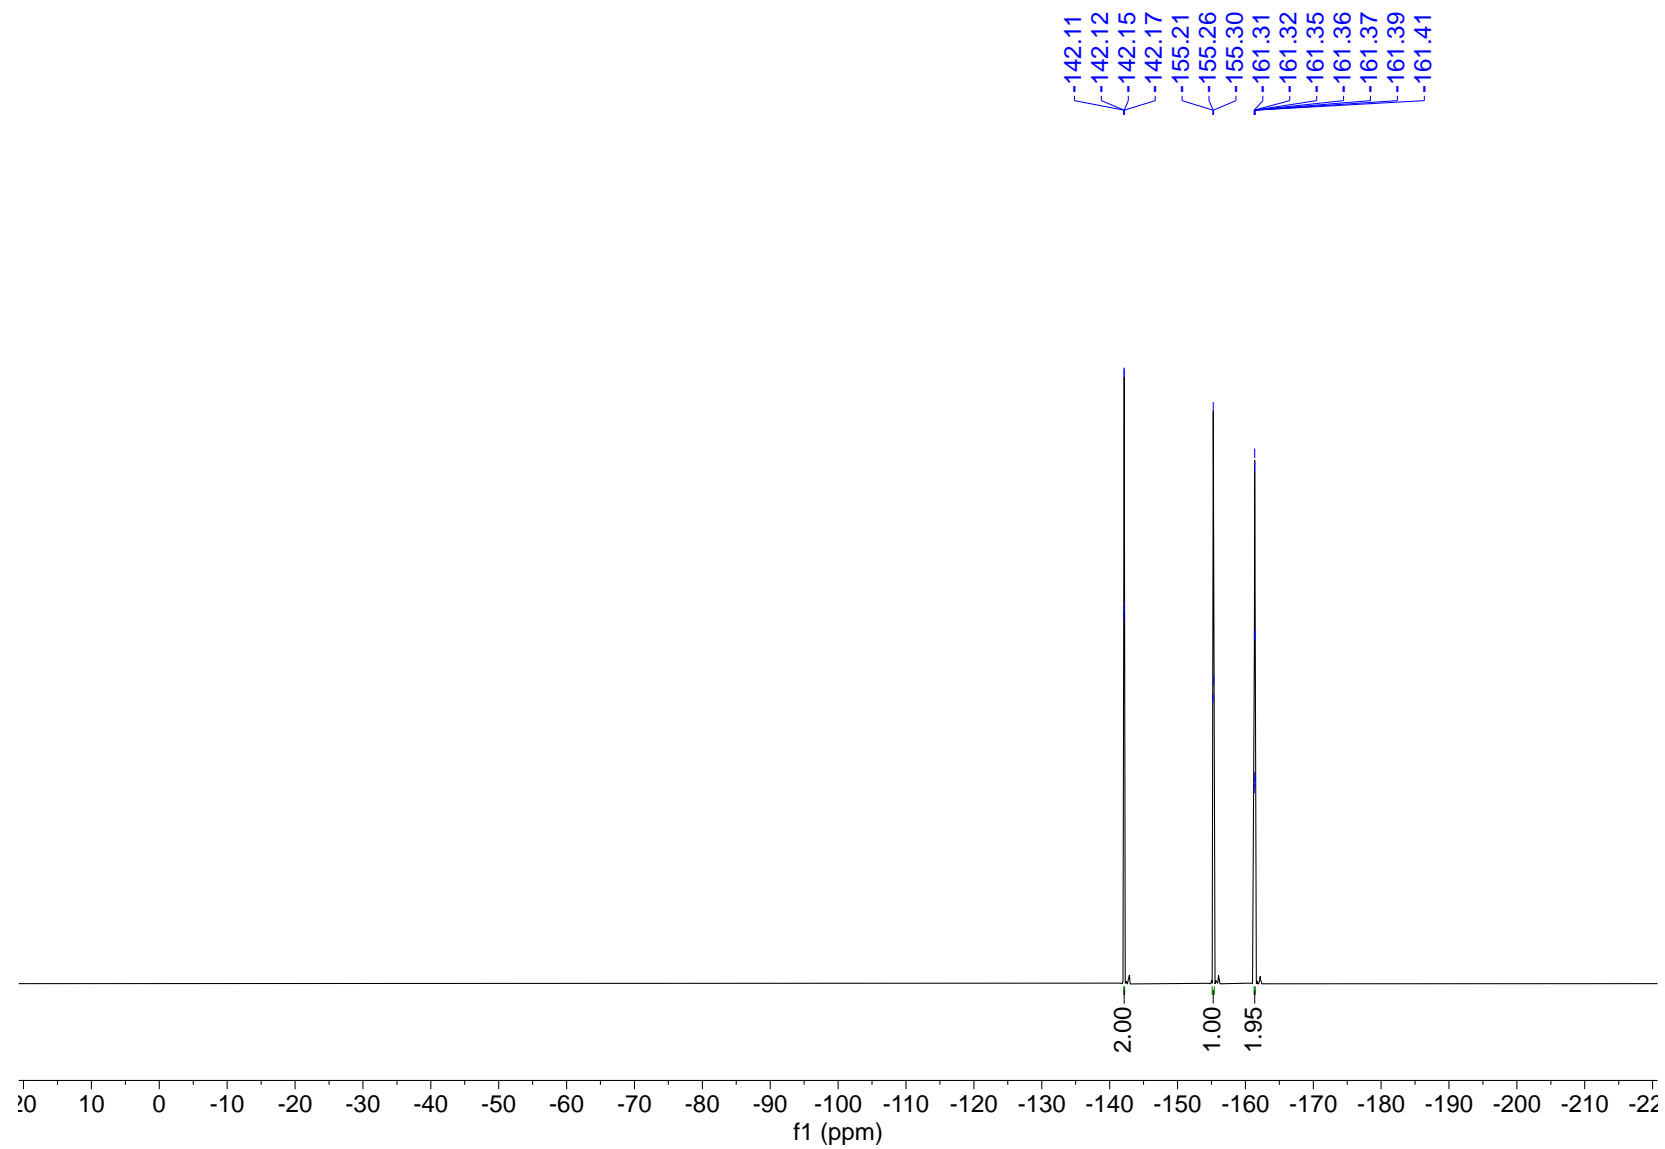

Figure S94:  $^1\text{H}$  NMR (400.1 MHz,  $\text{CDCl}_3$ , 298 K) spectrum of the mixture of **4** and **6**.

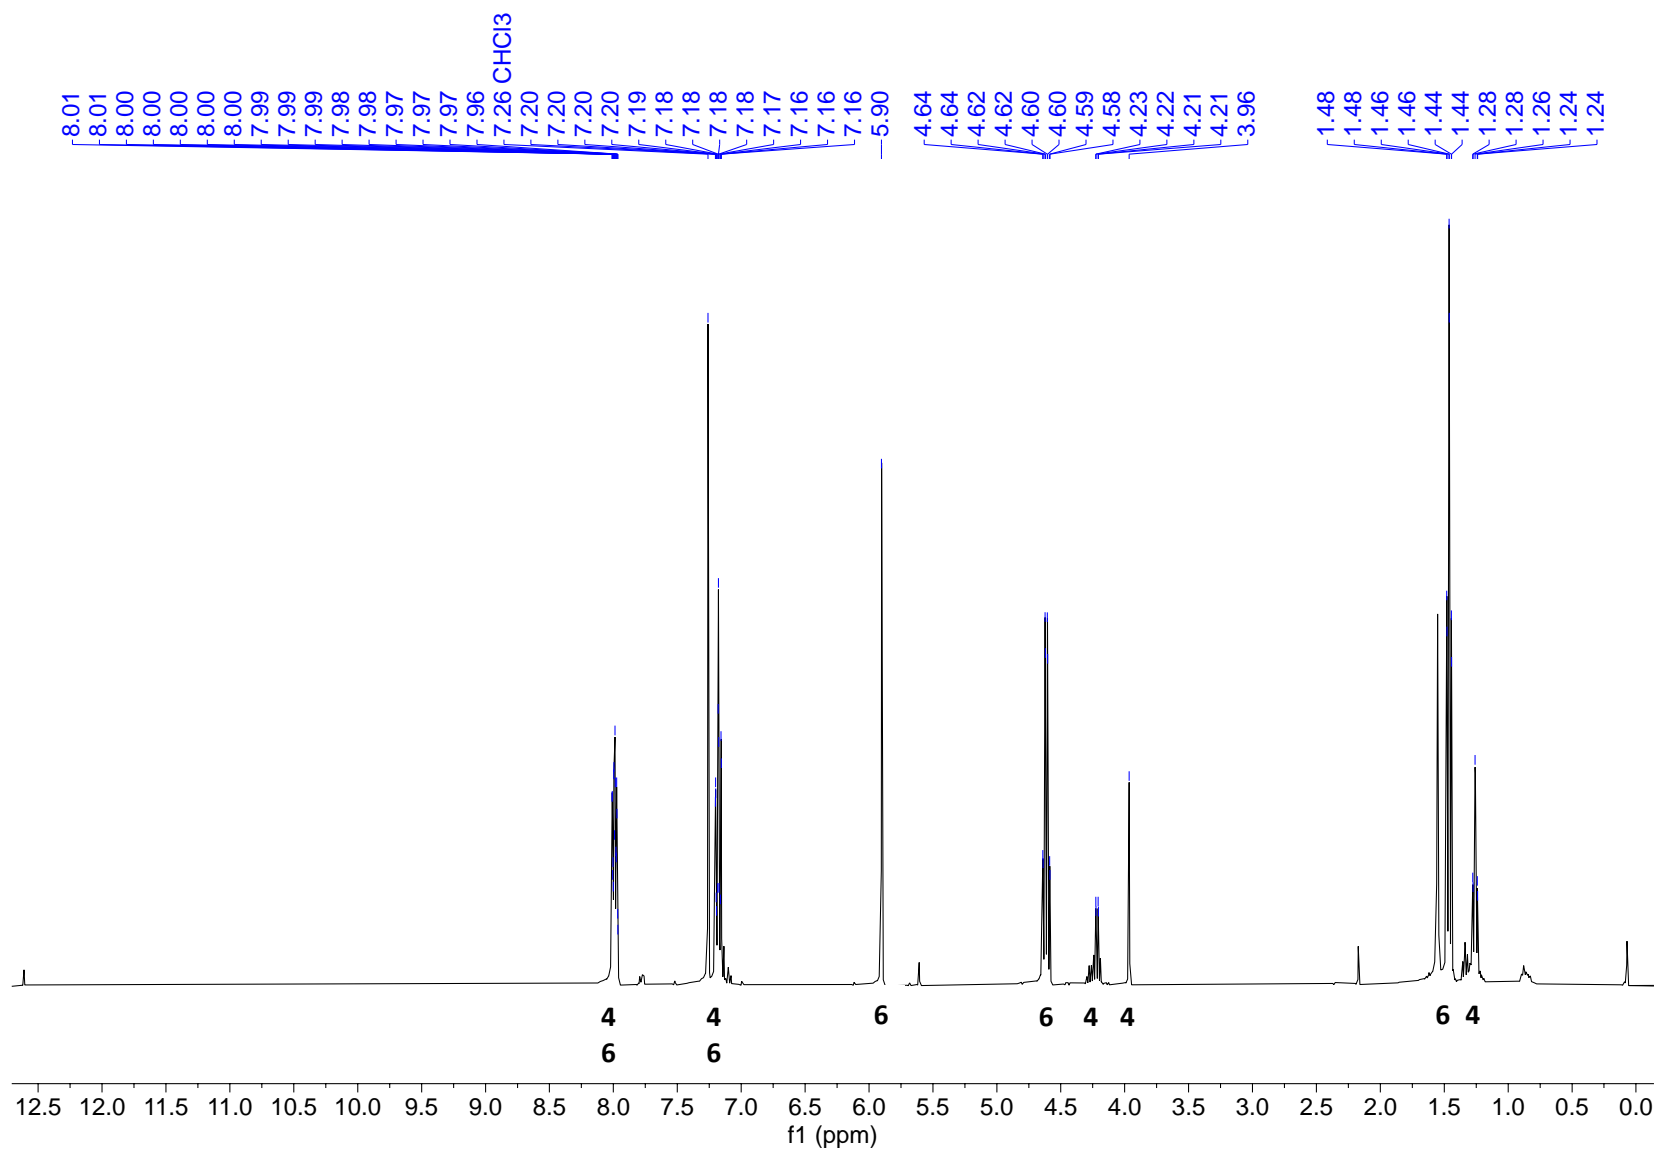



Figure S95:  $^1\text{H}$  NMR (400.1 MHz,  $\text{CDCl}_3$ , 298 K) spectrum of **6**.

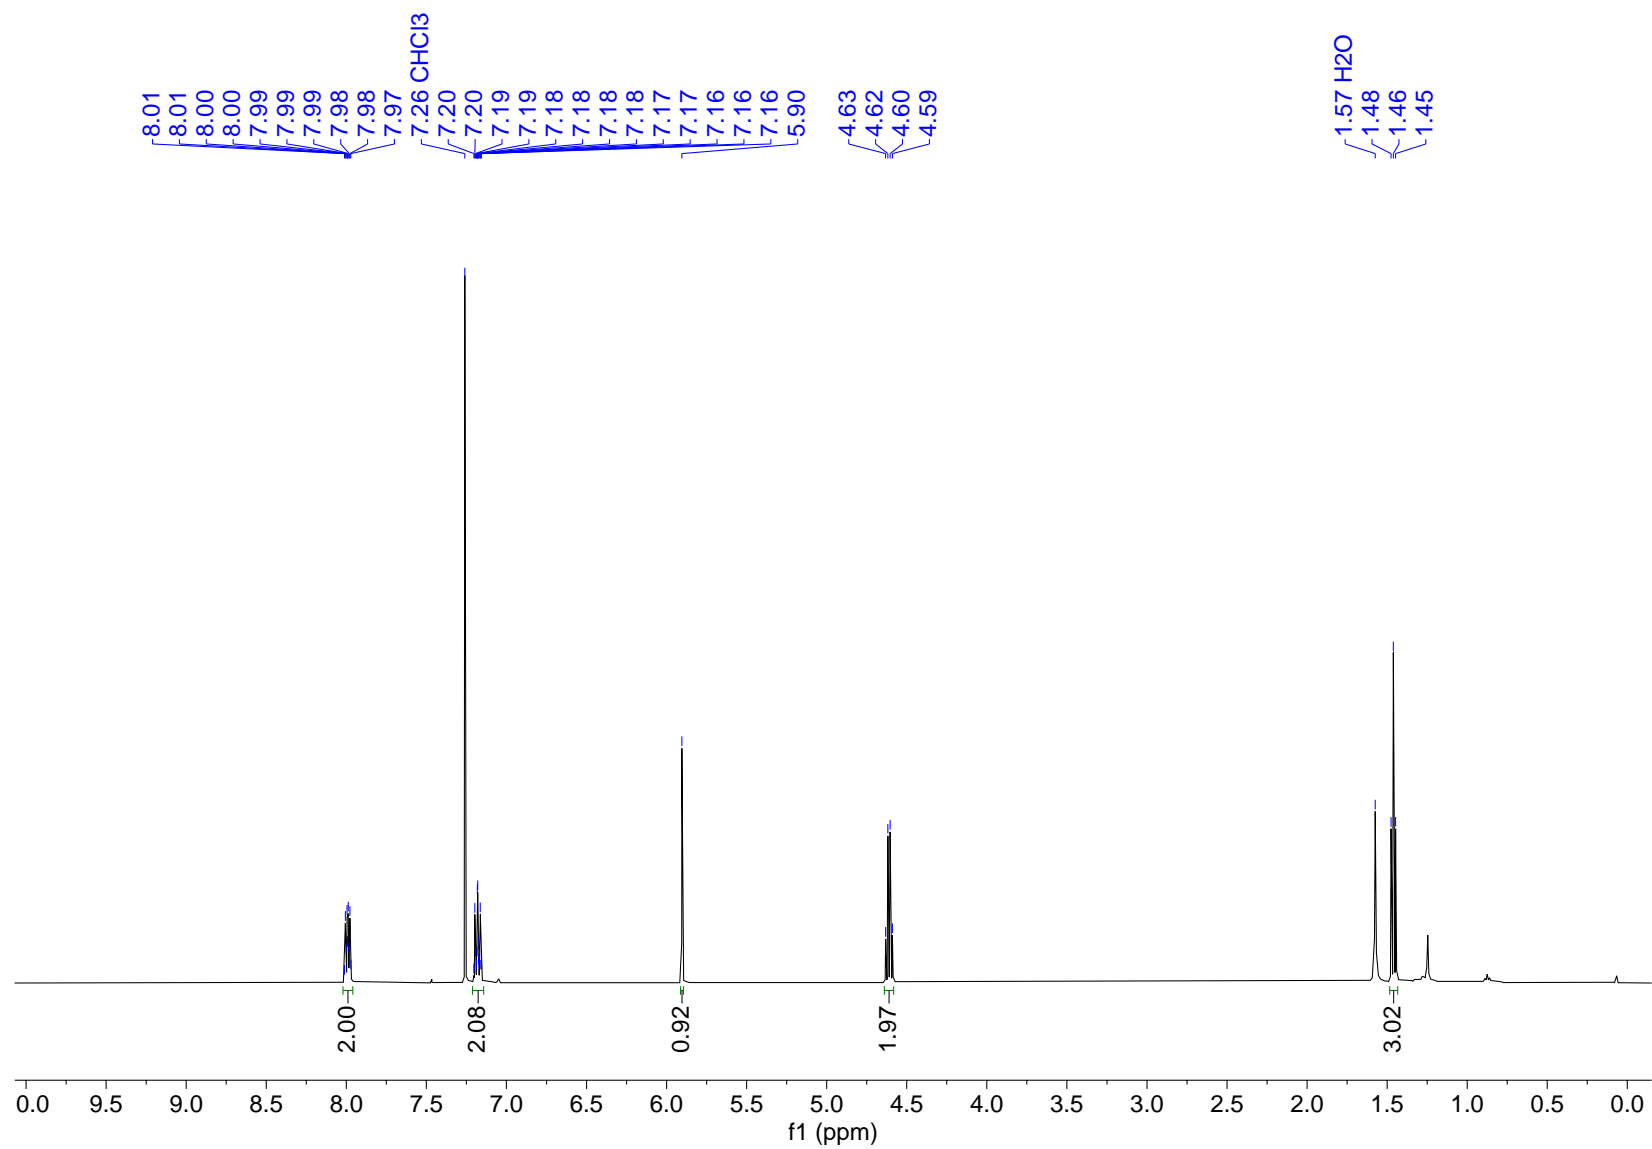

Figure S96:  $^{11}\text{B}$  NMR (157.4 MHz,  $\text{CDCl}_3$ , 298 K) spectrum of **6**.

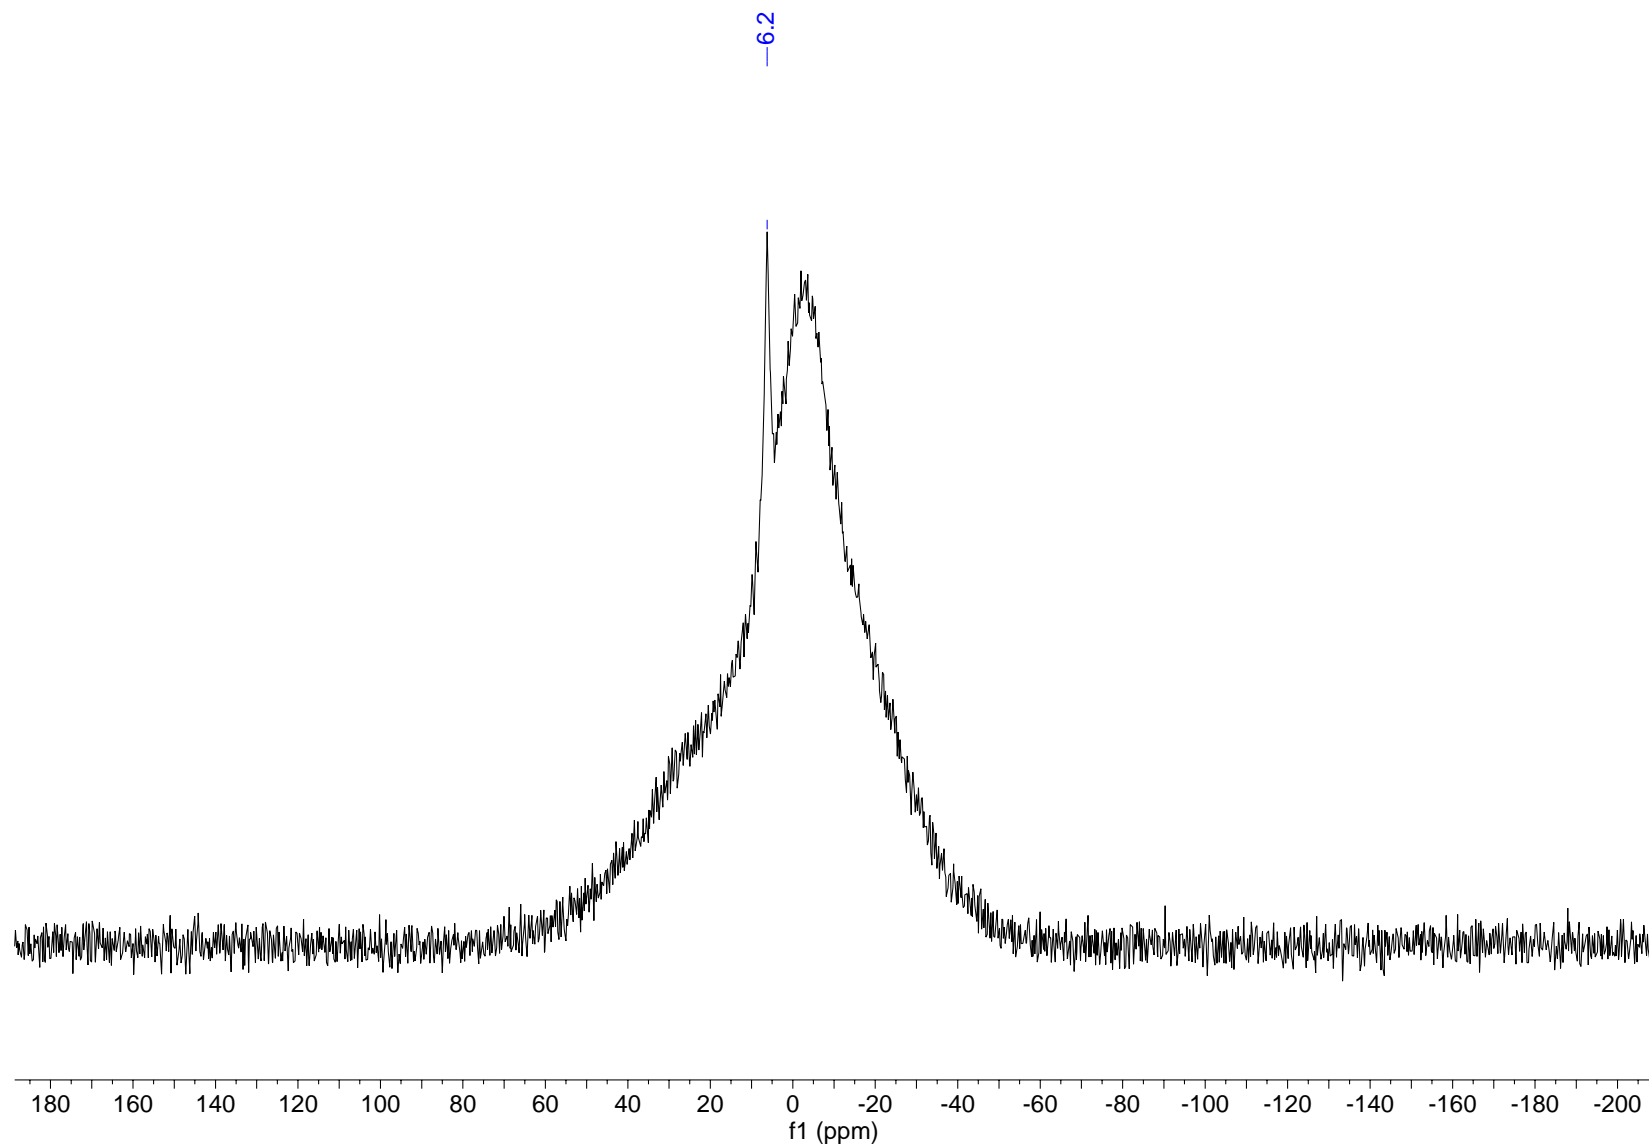

Figure S97:  $^{19}\text{F}$  NMR (470.2 MHz,  $\text{CDCl}_3$ , 298 K) spectrum of **6**.

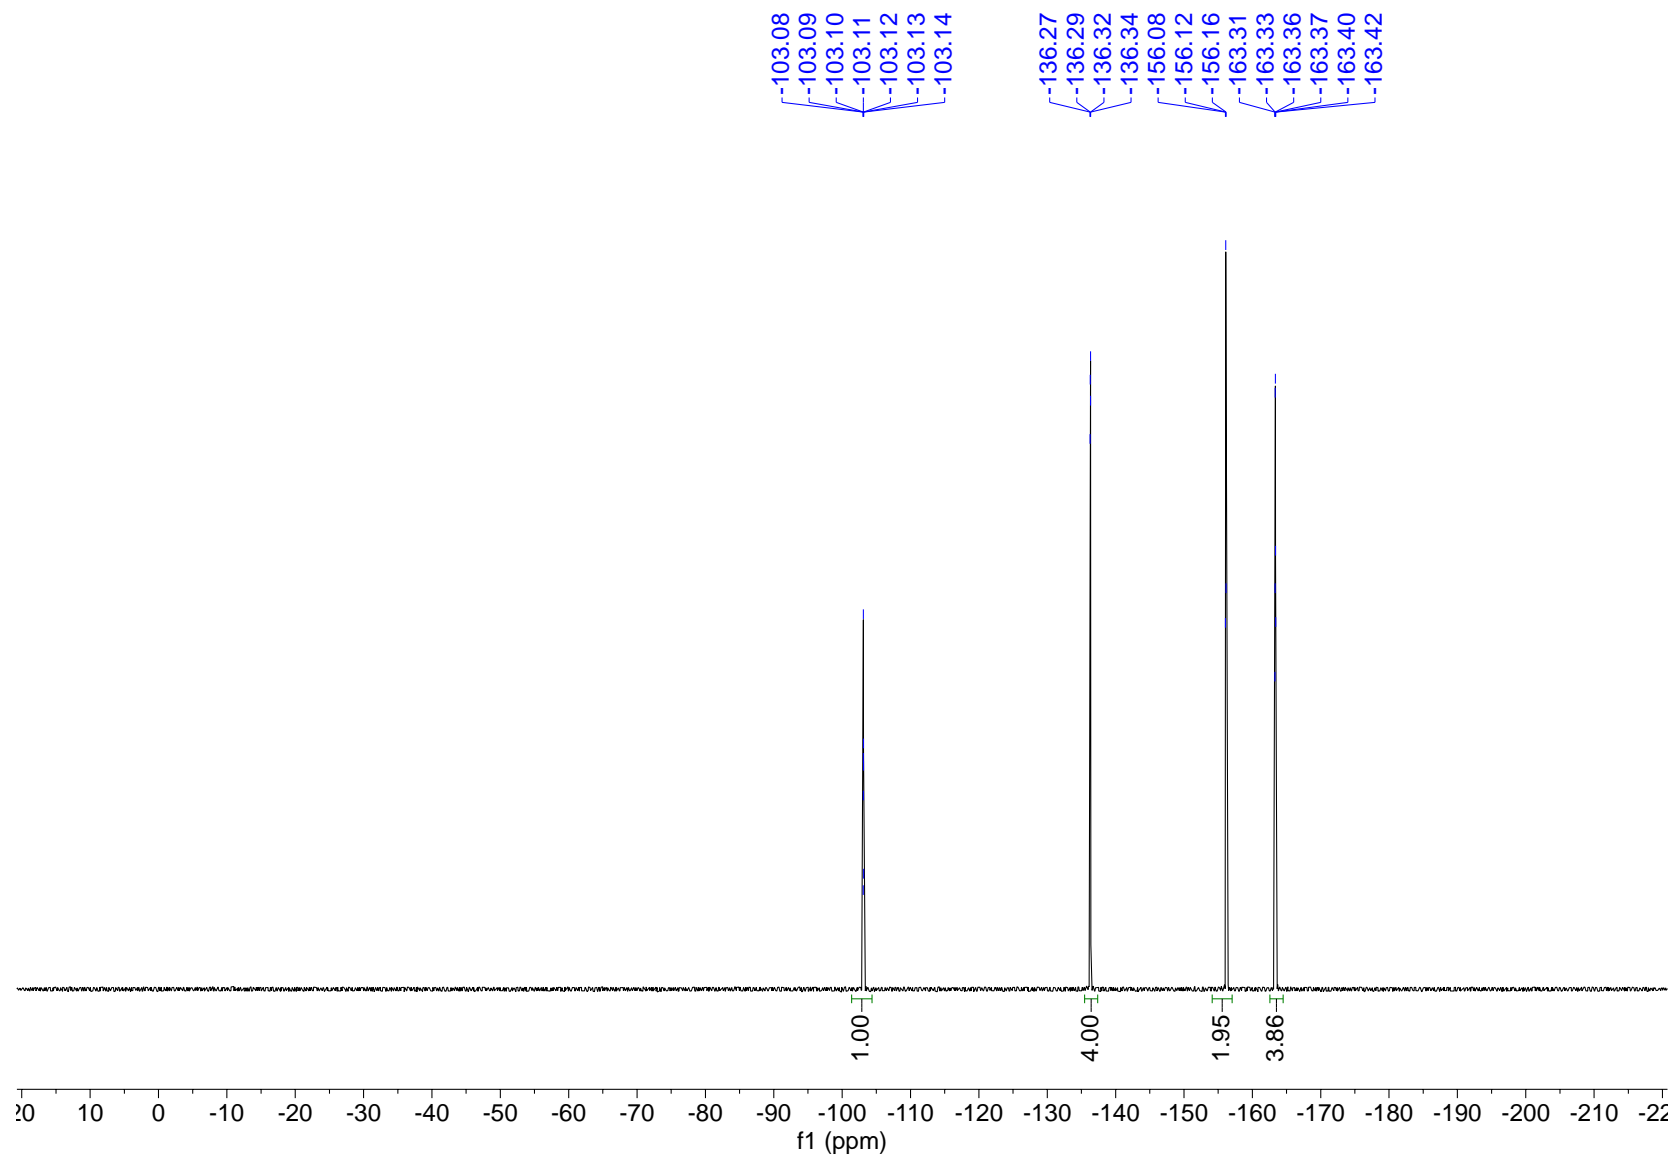

Figure S98:  $^1\text{H}$  NMR (400.1 MHz,  $\text{CDCl}_3$ , 298 K) spectrum of the crude reaction mixture including **5**.

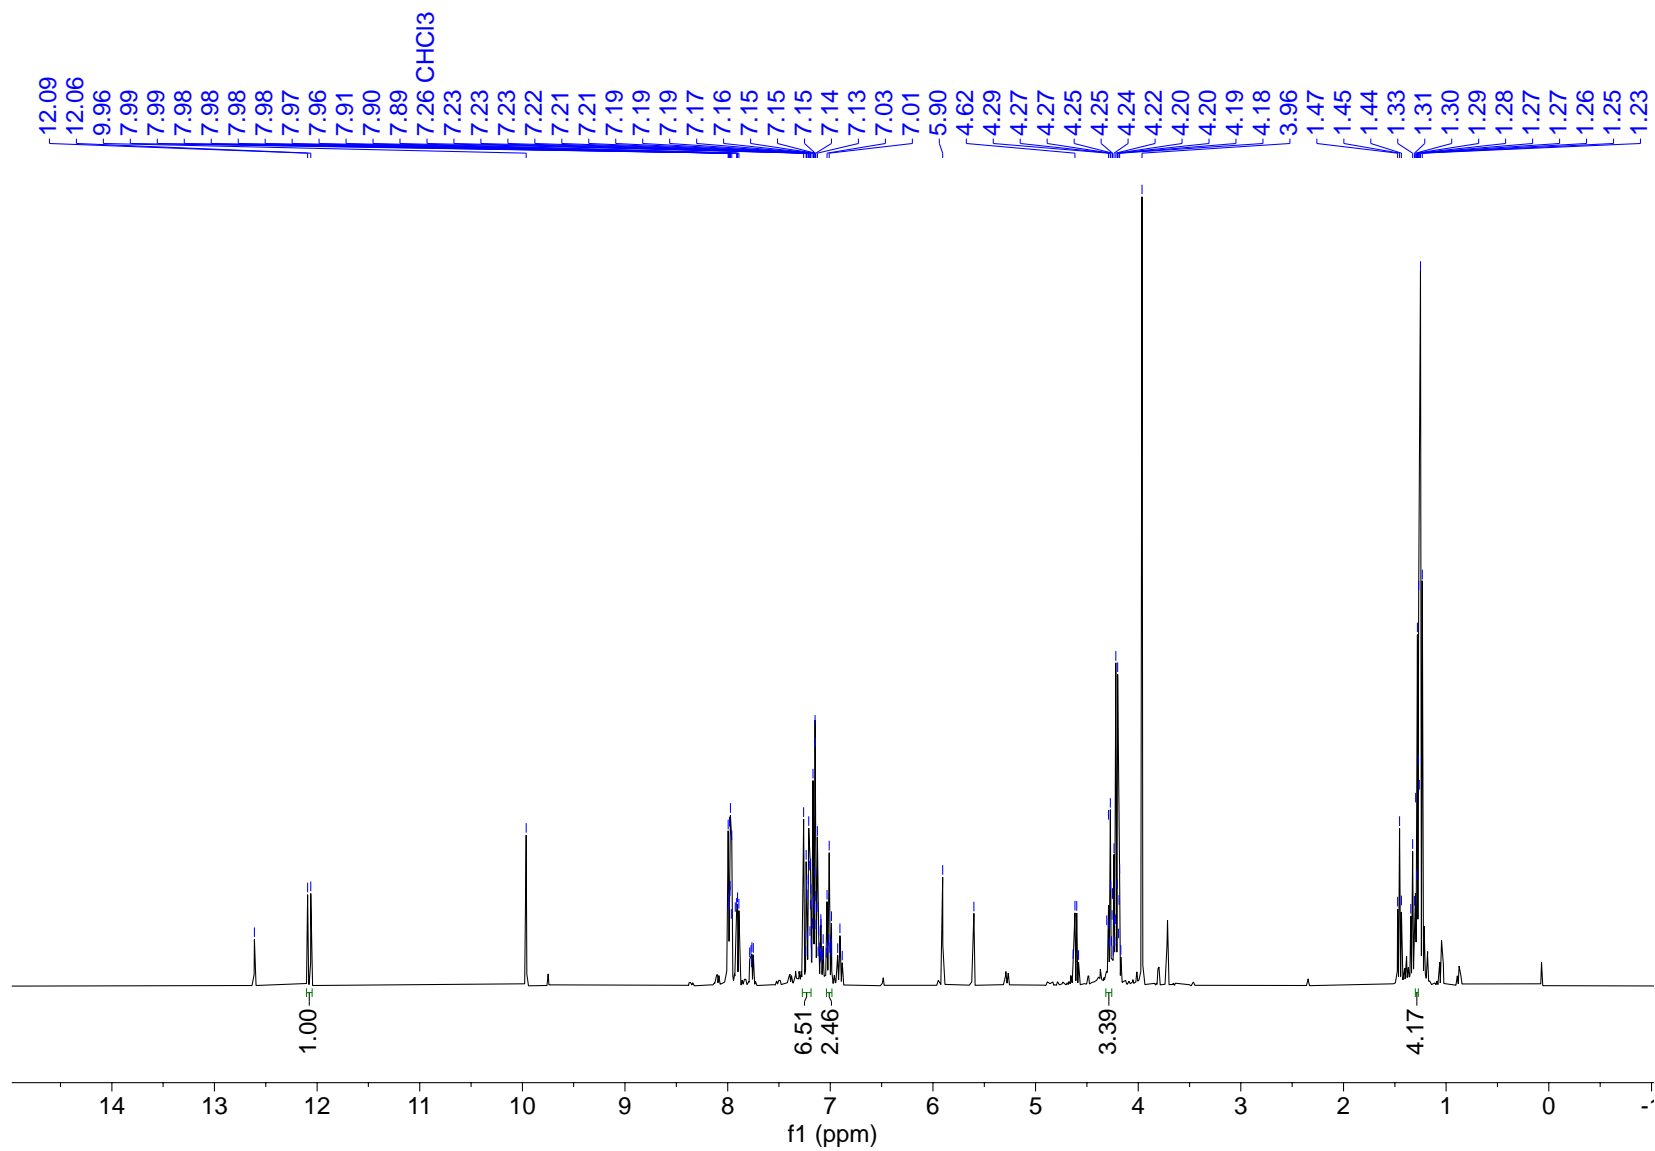

## 6. Crystallographic Data

### 6.1 Single crystal X-ray diffraction experimental

Single crystals of **6**, **2a**, **2k**, **2c**, and **2i** were grown by slow evaporation of a concentrated  $\text{CHCl}_3$  solution. **8** was grown by vapour diffusion using  $\text{CH}_2\text{Cl}_2$ /pentane. Crystallographic studies were undertaken on single crystal mounted in paratone and studied on an Agilent SuperNova Dual Atlas three-circle diffractometer using  $\text{Cu-K}\alpha$  radiation and a CCD detector. Measurements were taken at 150(2) K with temperatures maintained using an Oxford cryostream. Data were collected and integrated and data corrected for absorption using a numerical absorption correction based on Gaussian integration over a multifaceted crystal model within CrysAlisPro.<sup>5</sup> The structures were solved by direct methods and refined against  $F^2$  within SHELXL-2013.<sup>6</sup> The structures have been deposited with the Cambridge Structural Database (CCDC deposition numbers **2154538–2154540**, **2154542**, **2154543**, and **2154565**). These can be obtained free of charge from the Cambridge Crystallographic Data Centre via [www.ccdc.cam.ac.uk/data\\_request/cif](http://www.ccdc.cam.ac.uk/data_request/cif)

### 6.2 Solid-state structures

Figure S99: Solid-state structure of compound **6**, thermal ellipsoids drawn at 50% probability. Carbon: black; oxygen: red; boron: pink; fluorine: green. H atoms omitted for clarity.

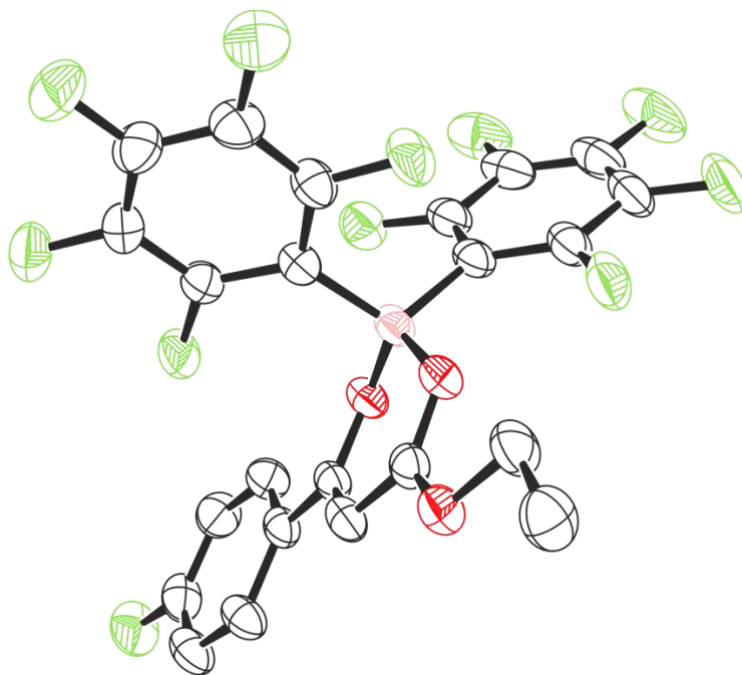

Figure S100: Solid-state structure of compound **2a**, thermal ellipsoids drawn at 50% probability. Carbon: black; oxygen: red; fluorine: green. H atoms omitted for clarity.

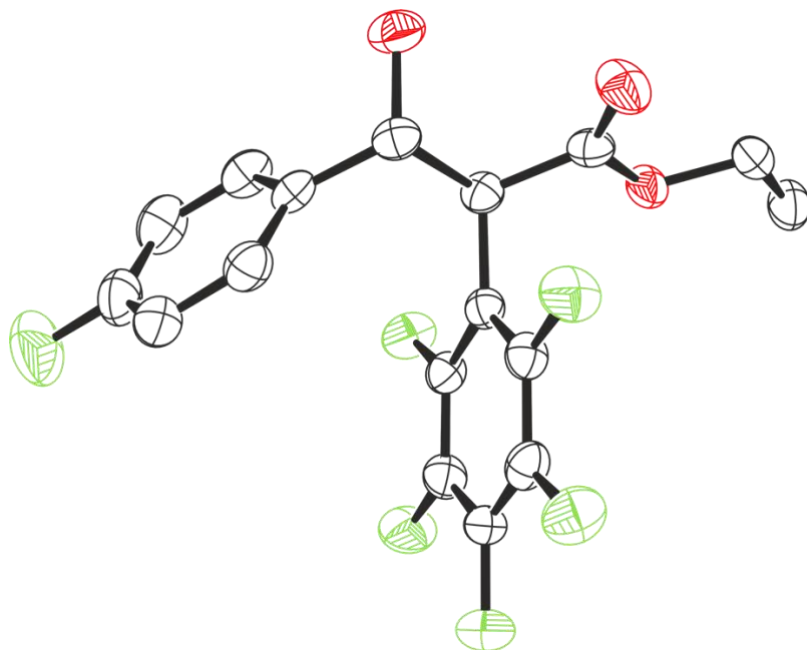

Figure S101: Solid-state structure of compound **2k**, thermal ellipsoids drawn at 50% probability. Carbon: black; oxygen: red; fluorine: green. H atoms omitted for clarity.

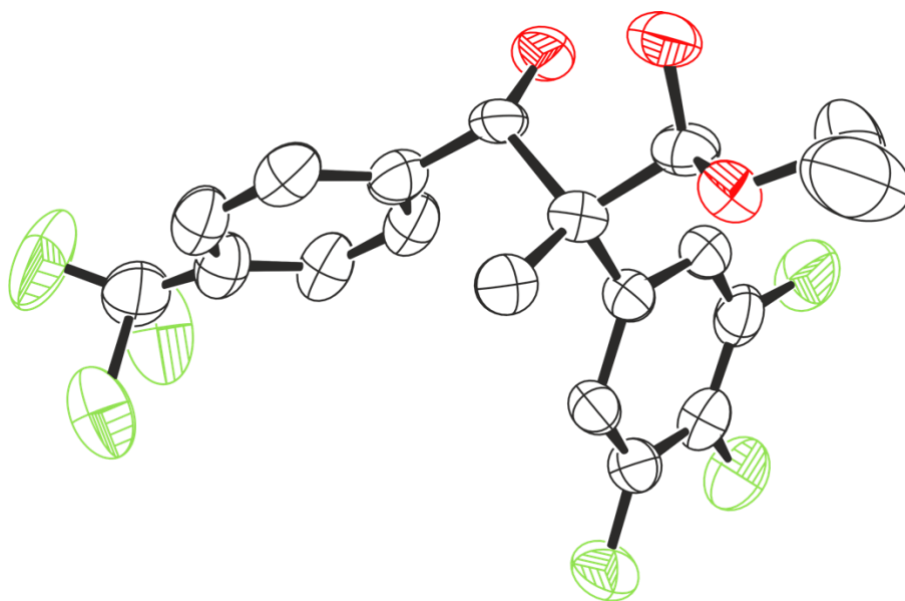

Figure S102: Solid-state structure of compound **2c**, thermal ellipsoids drawn at 50% probability. Carbon: black; oxygen: red; fluorine: green. H atoms omitted for clarity.

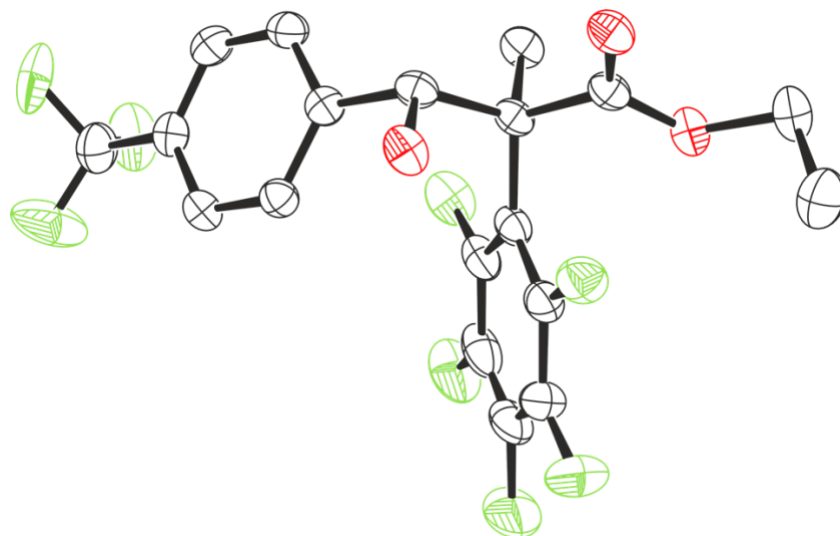

Figure S103: Solid-state structure of compound **2i**, thermal ellipsoids drawn at 50% probability. Carbon: black; oxygen: red; fluorine: green. H atoms omitted for clarity.

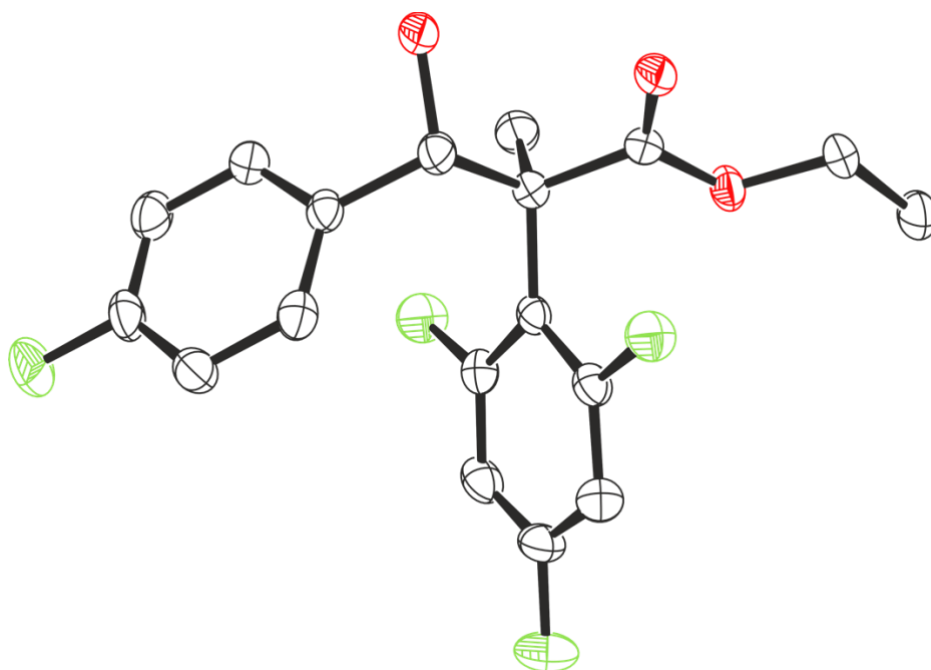

Figure S104: Solid-state structure of compound **8**, thermal ellipsoids drawn at 50% probability. Carbon: black; oxygen: red; fluorine: green. H atoms omitted for clarity.

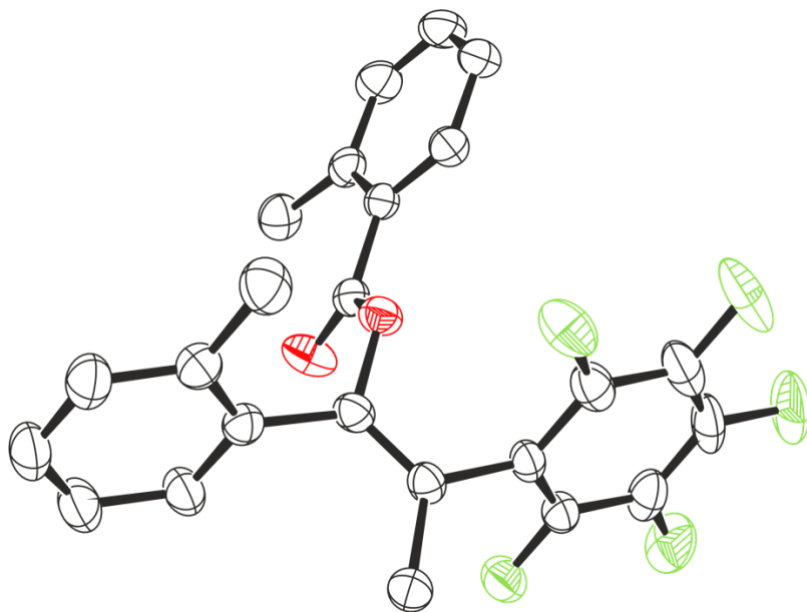



### 6.3 X-ray refinement data

**Table S1.** Crystal data and structure refinement for compound **6**. [RM2146b] CCDC 2154540

|                                                              |                                                                              |
|--------------------------------------------------------------|------------------------------------------------------------------------------|
| Empirical formula                                            | C <sub>23</sub> H <sub>10</sub> BF <sub>11</sub> O <sub>3</sub>              |
| Formula weight                                               | 554.12                                                                       |
| Temperature/K                                                | 180(2)                                                                       |
| Crystal system                                               | Monoclinic                                                                   |
| Space group                                                  | <i>P2<sub>1</sub>/n</i>                                                      |
| <i>a</i> /Å                                                  | 9.1068(3)                                                                    |
| <i>b</i> /Å                                                  | 13.2125(4)                                                                   |
| <i>c</i> /Å                                                  | 18.2143(7)                                                                   |
| $\alpha$ /°                                                  | 90                                                                           |
| $\beta$ /°                                                   | 93.148(3)                                                                    |
| $\gamma$ /°                                                  | 90                                                                           |
| Volume/Å <sup>3</sup>                                        | 2188.32(13)                                                                  |
| <i>Z</i>                                                     | 4                                                                            |
| Density ( $\rho_{\text{calc}}$ /cm <sup>3</sup> )            | 1.682                                                                        |
| Absorption coefficient ( $\mu$ /mm <sup>-1</sup> )           | 1.555                                                                        |
| F(000)                                                       | 1104.0                                                                       |
| Crystal size/mm <sup>3</sup>                                 | 0.492 × 0.115 × 0.073                                                        |
| Radiation                                                    | CuK $\alpha$ ( $\lambda$ = 1.54178)                                          |
| 2 $\theta$ range for data collection/°                       | 4.136 to 72.900                                                              |
| Index ranges                                                 | -11 ≤ <i>h</i> ≤ 8, -15 ≤ <i>k</i> ≤ 16, -20 ≤ <i>l</i> ≤ 22                 |
| Reflections collected                                        | 8687                                                                         |
| Independent reflections                                      | 4222 [ <i>R</i> <sub>int</sub> = 0.0256, <i>R</i> <sub>sigma</sub> = 0.0334] |
| Data/restraints/parameters                                   | 4222/0/344                                                                   |
| Goodness-of-fit on F <sup>2</sup>                            | 1.022                                                                        |
| Final <i>R</i> indexes [ <i>I</i> ≥ 2 $\sigma$ ( <i>I</i> )] | <i>R</i> <sub>1</sub> = 0.041, <i>wR</i> <sub>2</sub> = 0.106                |
| Final <i>R</i> indexes [all data]                            | <i>R</i> <sub>1</sub> = 0.057, <i>wR</i> <sub>2</sub> = 0.120                |
| Largest diff. peak/hole / e Å <sup>-3</sup>                  | 0.233/-0.230                                                                 |

**Table S2.** Crystal data and structure refinement for compound **2a** (RM2140) CCDC 2154539

|                                                              |                                                                              |
|--------------------------------------------------------------|------------------------------------------------------------------------------|
| Empirical formula                                            | C <sub>17</sub> H <sub>12</sub> F <sub>6</sub> O <sub>3</sub>                |
| Formula weight                                               | 378.27                                                                       |
| Temperature/K                                                | 200(2)                                                                       |
| Crystal system                                               | triclinic                                                                    |
| Space group                                                  | <i>P</i> -1                                                                  |
| <i>a</i> /Å                                                  | 5.8206 (3)                                                                   |
| <i>b</i> /Å                                                  | 17.0082 (9)                                                                  |
| <i>c</i> /Å                                                  | 18.1536 (10)                                                                 |
| $\alpha$ /°                                                  | 63.134 (5)                                                                   |
| $\beta$ /°                                                   | 87.435 (4)                                                                   |
| $\gamma$ /°                                                  | 88.496 (4)                                                                   |
| Volume/Å <sup>3</sup>                                        | 1601.54 (16)                                                                 |
| <i>Z</i>                                                     | 4                                                                            |
| Density ( $\rho_{\text{calc}}$ /cm <sup>3</sup> )            | 1.569                                                                        |
| Absorption coefficient ( $\mu$ /mm <sup>-1</sup> )           | 0.152                                                                        |
| <i>F</i> (000)                                               | 768                                                                          |
| Crystal size/mm <sup>3</sup>                                 | 0.30 × 0.15 × 0.10                                                           |
| Radiation                                                    | MoK $\alpha$ ( $\lambda$ = 0.71073)                                          |
| 2 $\theta$ range for data collection/°                       | 4.008 to 28.242                                                              |
| Index ranges                                                 | -7 ≤ <i>h</i> ≤ 7, -23 ≤ <i>k</i> ≤ 22, -20 ≤ <i>l</i> ≤ 24                  |
| Reflections collected                                        | 14036                                                                        |
| Independent reflections                                      | 7680 [ <i>R</i> <sub>int</sub> = 0.0337, <i>R</i> <sub>sigma</sub> = 0.0597] |
| Data/restraints/parameters                                   | 7680/0/475                                                                   |
| Goodness-of-fit on <i>F</i> <sup>2</sup>                     | 1.037                                                                        |
| Final <i>R</i> indexes [ <i>I</i> ≥ 2 $\sigma$ ( <i>I</i> )] | <i>R</i> <sub>1</sub> = 0.059, <i>wR</i> <sub>2</sub> = 0.141                |
| Final <i>R</i> indexes [all data]                            | <i>R</i> <sub>1</sub> = 0.105, <i>wR</i> <sub>2</sub> = 0.170                |
| Largest diff. peak/hole / e Å <sup>-3</sup>                  | 0.63/-0.27                                                                   |

**Table S3.** Crystal data and structure refinement for compound **2k** (RM1831h) CCDC 2154538

|                                                              |                                                                              |
|--------------------------------------------------------------|------------------------------------------------------------------------------|
| Empirical formula                                            | C <sub>19</sub> H <sub>16</sub> F <sub>6</sub> O <sub>3</sub>                |
| Formula weight                                               | 406.32                                                                       |
| Temperature/K                                                | 200(2)                                                                       |
| Crystal system                                               | triclinic                                                                    |
| Space group                                                  | <i>P</i> -1                                                                  |
| <i>a</i> /Å                                                  | 7.1188 (2)                                                                   |
| <i>b</i> /Å                                                  | 10.3636 (3)                                                                  |
| <i>c</i> /Å                                                  | 12.8288 (4)                                                                  |
| $\alpha$ /°                                                  | 101.608 (3)                                                                  |
| $\beta$ /°                                                   | 91.454 (2)                                                                   |
| $\gamma$ /°                                                  | 100.640 (3)                                                                  |
| Volume/Å <sup>3</sup>                                        | 909.24 (5)                                                                   |
| <i>Z</i>                                                     | 2                                                                            |
| Density ( $\rho_{\text{calc}}$ /cm <sup>3</sup> )            | 1.484                                                                        |
| Absorption coefficient ( $\mu$ /mm <sup>-1</sup> )           | 1.236                                                                        |
| F(000)                                                       | 416.0                                                                        |
| Crystal size/mm <sup>3</sup>                                 | 0.548 × 0.425 × 0.188                                                        |
| Radiation                                                    | CuK $\alpha$ ( $\lambda$ = 1.54184)                                          |
| 2 $\theta$ range for data collection/°                       | 4.401 to 73.332                                                              |
| Index ranges                                                 | -8 ≤ <i>h</i> ≤ 8, -12 ≤ <i>k</i> ≤ 12, -15 ≤ <i>l</i> ≤ 15                  |
| Reflections collected                                        | 31816                                                                        |
| Independent reflections                                      | 3644 [ <i>R</i> <sub>int</sub> = 0.0433, <i>R</i> <sub>sigma</sub> = 0.0175] |
| Data/restraints/parameters                                   | 3644/0/344                                                                   |
| Goodness-of-fit on F <sup>2</sup>                            | 1.047                                                                        |
| Final <i>R</i> indexes [ <i>I</i> ≥ 2 $\sigma$ ( <i>I</i> )] | <i>R</i> <sub>1</sub> = 0.055, <i>wR</i> <sub>2</sub> = 0.139                |
| Final <i>R</i> indexes [all data]                            | <i>R</i> <sub>1</sub> = 0.067, <i>wR</i> <sub>2</sub> = 0.147                |
| Largest diff. peak/hole / e Å <sup>-3</sup>                  | 0.23/-0.23                                                                   |

**Table S4.** Crystal data and structure refinement for compound **2c** (RM2204) CCDC 2154542

|                                                              |                                                                              |
|--------------------------------------------------------------|------------------------------------------------------------------------------|
| Empirical formula                                            | C <sub>19</sub> H <sub>14</sub> F <sub>8</sub> O <sub>3</sub>                |
| Formula weight                                               | 442.30                                                                       |
| Temperature/K                                                | 180(2)                                                                       |
| Crystal system                                               | triclinic                                                                    |
| Space group                                                  | <i>P</i> -1                                                                  |
| <i>a</i> /Å                                                  | 9.4520 (5)                                                                   |
| <i>b</i> /Å                                                  | 10.4243 (9)                                                                  |
| <i>c</i> /Å                                                  | 10.9360 (7)                                                                  |
| $\alpha$ /°                                                  | 71.015 (7)                                                                   |
| $\beta$ /°                                                   | 74.269 (5)                                                                   |
| $\gamma$ /°                                                  | 66.462 (7)                                                                   |
| Volume/Å <sup>3</sup>                                        | 921.67 (13)                                                                  |
| <i>Z</i>                                                     | 2                                                                            |
| Density ( $\rho_{\text{calc}}$ /cm <sup>3</sup> )            | 1.594                                                                        |
| Absorption coefficient ( $\mu$ /mm <sup>-1</sup> )           | 0.160                                                                        |
| <i>F</i> (000)                                               | 448.0                                                                        |
| Crystal size/mm <sup>3</sup>                                 | 0.442 × 0.227 × 0.137                                                        |
| Radiation                                                    | MoK $\alpha$ ( $\lambda$ = 0.71073)                                          |
| 2 $\theta$ range for data collection/°                       | 3.924 to 28.971                                                              |
| Index ranges                                                 | -11 ≤ <i>h</i> ≤ 11, -12 ≤ <i>k</i> ≤ 10, -12 ≤ <i>l</i> ≤ 12                |
| Reflections collected                                        | 6540                                                                         |
| Independent reflections                                      | 3144 [ <i>R</i> <sub>int</sub> = 0.0217, <i>R</i> <sub>sigma</sub> = 0.0338] |
| Data/restraints/parameters                                   | 3144/1/304                                                                   |
| Goodness-of-fit on <i>F</i> <sup>2</sup>                     | 1.047                                                                        |
| Final <i>R</i> indexes [ <i>I</i> ≥ 2 $\sigma$ ( <i>I</i> )] | <i>R</i> <sub>1</sub> = 0.038, <i>wR</i> <sub>2</sub> = 0.088                |
| Final <i>R</i> indexes [all data]                            | <i>R</i> <sub>1</sub> = 0.050, <i>wR</i> <sub>2</sub> = 0.097                |
| Largest diff. peak/hole / e Å <sup>-3</sup>                  | 0.18/-0.21                                                                   |

**Table S5.** Crystal data and structure refinement for compound **2i** (RM2205) CCDC 2154543

|                                                              |                                                                              |
|--------------------------------------------------------------|------------------------------------------------------------------------------|
| Empirical formula                                            | C <sub>18</sub> H <sub>16</sub> F <sub>4</sub> O <sub>3</sub>                |
| Formula weight                                               | 356.31                                                                       |
| Temperature/K                                                | 180 (2)                                                                      |
| Crystal system                                               | triclinic                                                                    |
| Space group                                                  | <i>P</i> -1                                                                  |
| <i>a</i> /Å                                                  | 8.0494 (7)                                                                   |
| <i>b</i> /Å                                                  | 9.9716 (7)                                                                   |
| <i>c</i> /Å                                                  | 11.4118 (7)                                                                  |
| $\alpha$ /°                                                  | 113.593 (6)                                                                  |
| $\beta$ /°                                                   | 103.792 (7)                                                                  |
| $\gamma$ /°                                                  | 90.918 (7)                                                                   |
| Volume/Å <sup>3</sup>                                        | 808.80 (11)                                                                  |
| <i>Z</i>                                                     | 2                                                                            |
| Density ( $\rho_{\text{calc}}$ /cm <sup>3</sup> )            | 1.463                                                                        |
| Absorption coefficient ( $\mu$ /mm <sup>-1</sup> )           | 0.129                                                                        |
| <i>F</i> (000)                                               | 368.0                                                                        |
| Crystal size/mm <sup>3</sup>                                 | 0.367 × 0.312 × 0.264                                                        |
| Radiation                                                    | MoK $\alpha$ ( $\lambda$ = 0.71073)                                          |
| 2 $\theta$ range for data collection/°                       | 4.087 to 28.697                                                              |
| Index ranges                                                 | -9 ≤ <i>h</i> ≤ 6, -12 ≤ <i>k</i> ≤ 10, -13 ≤ <i>l</i> ≤ 13                  |
| Reflections collected                                        | 6366                                                                         |
| Independent reflections                                      | 2948 [ <i>R</i> <sub>int</sub> = 0.0233, <i>R</i> <sub>sigma</sub> = 0.0384] |
| Data/restraints/parameters                                   | 2948/1/231                                                                   |
| Goodness-of-fit on <i>F</i> <sup>2</sup>                     | 1.039                                                                        |
| Final <i>R</i> indexes [ <i>I</i> ≥ 2 $\sigma$ ( <i>I</i> )] | <i>R</i> <sub>1</sub> = 0.038, <i>wR</i> <sub>2</sub> = 0.081                |
| Final <i>R</i> indexes [all data]                            | <i>R</i> <sub>1</sub> = 0.057, <i>wR</i> <sub>2</sub> = 0.092                |
| Largest diff. peak/hole / e Å <sup>-3</sup>                  | 0.22/-0.21                                                                   |

**Table S6.** Crystal data and structure refinement for compound **8** (RM2221) CCDC 2154565

|                                                              |                                                                              |
|--------------------------------------------------------------|------------------------------------------------------------------------------|
| Empirical formula                                            | C <sub>24</sub> H <sub>17</sub> F <sub>5</sub> O <sub>2</sub>                |
| Formula weight                                               | 432.37                                                                       |
| Temperature/K                                                | 180 (2)                                                                      |
| Crystal system                                               | triclinic                                                                    |
| Space group                                                  | <i>P</i> -1                                                                  |
| <i>a</i> /Å                                                  | 7.8551 (4)                                                                   |
| <i>b</i> /Å                                                  | 7.9171 (4)                                                                   |
| <i>c</i> /Å                                                  | 17.1195 (13)                                                                 |
| $\alpha$ /°                                                  | 101.373 (6)                                                                  |
| $\beta$ /°                                                   | 99.385 (5)                                                                   |
| $\gamma$ /°                                                  | 101.484 (5)                                                                  |
| Volume/Å <sup>3</sup>                                        | 999.91 (11)                                                                  |
| <i>Z</i>                                                     | 2                                                                            |
| Density ( $\rho_{\text{calc}}$ /cm <sup>3</sup> )            | 1.436                                                                        |
| Absorption coefficient ( $\mu$ /mm <sup>-1</sup> )           | 0.122                                                                        |
| F(000)                                                       | 444.0                                                                        |
| Crystal size/mm <sup>3</sup>                                 | 0.234 × 0.202 × 0.041                                                        |
| Radiation                                                    | MoK $\alpha$ ( $\lambda$ = 0.71073)                                          |
| 2 $\theta$ range for data collection/°                       | 3.266 to 29.399                                                              |
| Index ranges                                                 | -10 ≤ <i>h</i> ≤ 10, -10 ≤ <i>k</i> ≤ 10, -16 ≤ <i>l</i> ≤ 23                |
| Reflections collected                                        | 8968                                                                         |
| Independent reflections                                      | 4669 [ <i>R</i> <sub>int</sub> = 0.0040, <i>R</i> <sub>sigma</sub> = 0.0602] |
| Data/restraints/parameters                                   | 4669/0/283                                                                   |
| Goodness-of-fit on F <sup>2</sup>                            | 1.094                                                                        |
| Final <i>R</i> indexes [ <i>I</i> ≥ 2 $\sigma$ ( <i>I</i> )] | <i>R</i> <sub>1</sub> = 0.088, <i>wR</i> <sub>2</sub> = 0.233                |
| Final <i>R</i> indexes [all data]                            | <i>R</i> <sub>1</sub> = 0.118, <i>wR</i> <sub>2</sub> = 0.256                |
| Largest diff. peak/hole / e Å <sup>-3</sup>                  | 0.40/-0.31                                                                   |

## 7. References

- 1 Santi, M.; Ould, D. M. C.; Wenz, J., Soltani, Y.; Melen, R. L.; Wirth, T. *Angew. Chem. Int. Ed.* **2019**, *58*, 7861–7865.
- 2 Harris, R. K.; Becker, E. D.; Cabral De Menezes, S. M.; Goodfellow, R.; Granger, P. *Solid State Nucl Magn Reson.* **2002**, *4*, 458–483.
- 3 Y. Zhang, Y. Zhang, *Journal of Chemical Research* **2004**, 510–512.
- 4 D. Benito-Garagorri, J. Wiedermann, M. Pollak, K. Mereiter, and K. Kirchner, *Organometallics* **2007**, *26*, 217.
- 5 CrysAlisPro, Agilent Technologies, Version 1.171.37.33 (release 27-03-2014 CrysAlis171.NET).
- 6 SHELXL-2013, G.M. Sheldrick, University of Göttingen, Germany (2013).
